# Supplementary material for: Ion-pairing catalysis in the enantioselective addition of hydrazones to N-acyldihydropyrrole derivatives
Source: Royal Society of Chemistry journal article supplement (doi:10.1039/c8cc05311a), 2018-01-01
Supplement: c8cc05311a1.pdf [file c8cc05311a1.pdf]

## Ion-Pairing Catalysis in the Enantioselective Addition of Hydrazones to *N*-Acyldihydropyrrole Derivatives

Nagore Zabaleta, Uxue Uria,\* Efraím Reyes, Luisa Carrillo and Jose L. Vicario\*

Departamento de Química Orgánica II, Facultad de Ciencia y Tecnología. Universidad del País Vasco (UPV/EHU), P.O. Box 644, 48080 Bilbao (Spain), Fax: (+ 34) 94-601-2748 E-mail:uxue.uria@ehu.es, joseluis.vicario@ehu.es; Homepage: <http://www.ehu.es/gsa>

### Contents

|                                                        |             |
|--------------------------------------------------------|-------------|
| 1. General Methods                                     | page SI-2   |
| 2. Optimization of Reaction Conditions                 | page SI-3   |
| 3. Experimental Procedures and Characterizations       | page SI-5   |
| 4. X-Ray Analysis of Compound <b>4m</b> and <b>7a'</b> | page SI-32  |
| 5. NMR Spectra                                         | page SI-41  |
| 6. HPLC traces                                         | page SI-126 |

## 1. General Methods.<sup>1</sup>

NMR: Monodimensional nuclear magnetic resonance experiments, proton, carbon and fluorine spectra (<sup>1</sup>H NMR, <sup>13</sup>C NMR and <sup>19</sup>F NMR), were acquired on a Bruker AC-300 spectrometer (300 MHz for <sup>1</sup>H, 75.5 MHz for <sup>13</sup>C and 282 MHz for <sup>19</sup>F) and a Bruker AC-500 spectrometer (500 MHz for <sup>1</sup>H and 125.7 MHz <sup>13</sup>C) at the indicated temperature in each case. Chemical shifts ( $\delta$ ) are reported in ppm relative to residual solvent signals;<sup>2</sup> and coupling constants ( $J$ ) in hertz (Hz). The following abbreviations are used to indicate the multiplicity in <sup>1</sup>H NMR spectra: s, singlet; d, doublet; t, triplet; q, quartet; m, multiplet; bs, broad signal; appt t, apparent triplet. <sup>13</sup>C NMR spectra were acquired on a broad band decoupled mode using DEPT (Distortionless Enhancement by Polarization Transfer) experiments and/or HSQC (Heteronuclear Single Quantum Correlation) and HMBC (Heteronuclear Multiple Bond Correlation) experiments for assigning different types of carbon environment. Correlation Spectroscopy (<sup>1</sup>H-<sup>1</sup>H COSY) experiments were acquired to confirm precise molecular connectivity and to assist in deconvoluting complex multiplet signals.<sup>3</sup>

IR: Infrared spectra were measured in a Jasco FT/IR 4100 apparatus in the interval between 4000 and 400 cm<sup>-1</sup> with a 4 cm<sup>-1</sup> resolution, using Attenuated Total Reflection (ATR) technique. Only characteristic bands are given in each case.

MS: Mass spectra were recorded on an Agilent 7890A gas chromatograph coupled to an Agilent 5975 mass spectrometer under electronic impact (EI) conditions at 70 eV. The obtained data is presented in mass units (m/z) and the values found in brackets belong to the relative intensities comparing to the base peak (100%).

HRMS: High-resolution mass spectra were recorded on an Acquity UPLC coupled to a QTOF mass spectrometer (SYNAPT G2 HDMS) using electrospray ionization (ESI<sup>+</sup> or ESI<sup>-</sup>).

M.p.: Melting points were measured in a Büchi B-540 apparatus in open capillary tubes and are uncorrected.

HPLC: High performance liquid chromatography traces were recorded on a chiral stationary phase was performed in a Waters 2695 chromatograph coupled to a Waters 2998 photodiode array detector or Waters 600 chromatograph coupled to a Waters 996 photodiode array detector. Daicel Chiralpak AD-H, AS-H, IA, IC, ID-3, IE-3, AY-3 and Chiralcel OD-3, OZ-3 columns (0.46 cm  $\times$  25 cm) were used. Specific conditions are indicated for each case.

X-ray data collections were performed in an Agilent Supernova diffractometer equipped with an Atlas CCD area detector, and a CuK $\alpha$  micro-focus source with multilayer optics ( $\lambda = 1.54184\text{\AA}$ , 250 $\mu\text{m}$  FWHM beam size). The sample was kept at 120 K with an Oxford Cryosystems Cryostream 700 cooler. The quality of the crystals was checked under a polarizing microscope, and a suitable crystal or fragment was mounted on a Mitegen Micromount<sup>TM</sup> using Paratone N inert oil and transferred to the diffractometer.

Miscellaneous: Analytical grade solvents and commercially available reagents were used without further purification. Anhydrous solvents were purified and dried with activated molecular sieves prior to use<sup>4</sup> or using standard procedures described in the literature.<sup>5</sup> For reactions carried out under inert conditions, the argon was previously dried through a column of P<sub>2</sub>O<sub>5</sub> and a column of KOH and CaCl<sub>2</sub>. All the glassware was dried for 12 hours prior to use in an oven at 140°C, and allowed to cool under a dehumidified atmosphere.<sup>6</sup> Reactions were monitored using analytical thin layer chromatography (TLC), in pre-coated silica-backed plates (Merck Kieselgel 60 F254). These were visualized by ultraviolet irradiation and *p*-anisaldehyde dips.<sup>7</sup> For flash chromatography Silicycle 40-63, 230-400 mesh silica gel was used.<sup>8</sup> For the removal of solvents under reduced pressure Büchi series R-2 rotary evaporators were used. Reaction at reduces temperatures were carried out using a Termo Haake EK90 refrigerator.

The racemic standards for HPLC separation of stereoisomers were prepared using diphenyl phosphate as catalyst.

---

<sup>1</sup> SGIker technical support (MEC, GV/EJ and European Social Fund) is gratefully acknowledged (NMR and X-ray analysis).

<sup>2</sup> H. E. Gottlieb, V. Kotlyar, A. Nudelman, *J. Org. Chem.* **1997**, *62*, 7512.

<sup>3</sup> M. Kinss, J. K. M. Sanders, *J. Mag. Res.* **1984**, *56*, 518.

<sup>4</sup> J. Frey, S. Proemmel, M. A. Armitage, A. B. Holmes, *Org. Synth.* **2006**, *83*, 209.

<sup>5</sup> D. D. Perrin, W. L. F. Armarego, *Purification of Laboratory Chemicals*; Pergamon Press: Oxford, 1997.

<sup>6</sup> G. W. Kramer, A. B. Levy, M. M. Midland, *Organic Synthesis via Boranes*; John Wiley & Sons: New York, 1975.

<sup>7</sup> E. Stahl, *Thin Layer Chromatography*; Springer-Verlag: Berlin, 1969.

<sup>8</sup> W. C. Still, H. Kahn, A. J. Mitra, *J. Org. Chem.* **1978**, *43*, 2923.

## 2. Optimization of Reaction Conditions

Optimization of reactions conditions with different BINOL-based chiral phosphoric acids and *N*-triflylphosphoramides are presented in table SI-1, screening of different solvents are presented in table SI-2 and screening of temperature and drying agents are summarized in table SI-3.

**Table SI-1.** Chiral BINOL-derived Brønsted acid catalyst survey<sup>a</sup>

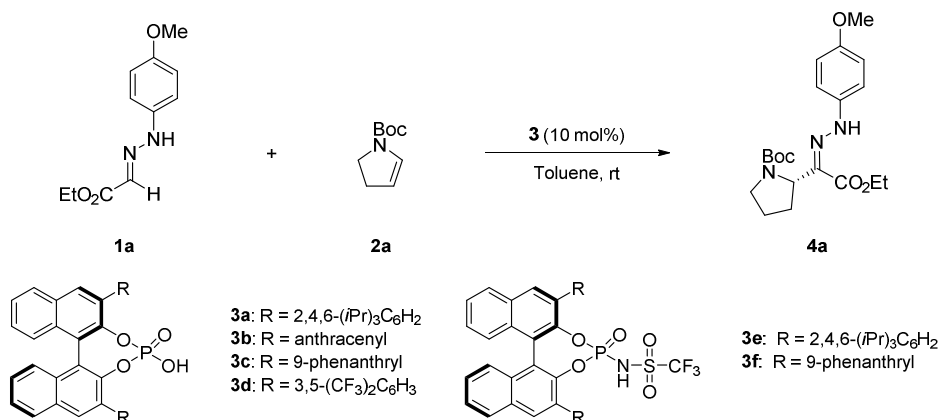

| Entry          | Catalyst  | Yield <sup>b</sup> | e.e. <sup>c</sup> |
|----------------|-----------|--------------------|-------------------|
| 1              | <b>3a</b> | <b>54</b>          | <b>68</b>         |
| 2              | <b>3b</b> | 52                 | 23                |
| 3              | <b>3c</b> | 53                 | 25                |
| 4              | <b>3d</b> | 53                 | 15                |
| 5              | <b>3e</b> | 61                 | 8                 |
| 6              | <b>3f</b> | 74                 | 0                 |
| 7 <sup>d</sup> | <b>3f</b> | 48                 | 2                 |

<sup>a</sup> The reaction was performed in 0.26 mL of toluene and 0.13 mmol of **2a**, using 1.2 eq. of **1a** at rt. <sup>b</sup> Yield of pure product isolated after flash chromatography. <sup>c</sup> Determined by HPLC analysis of the pure product. <sup>d</sup> Reaction carried out at -78°C.

**Table SI-2.** Screening of different solvents<sup>a</sup>

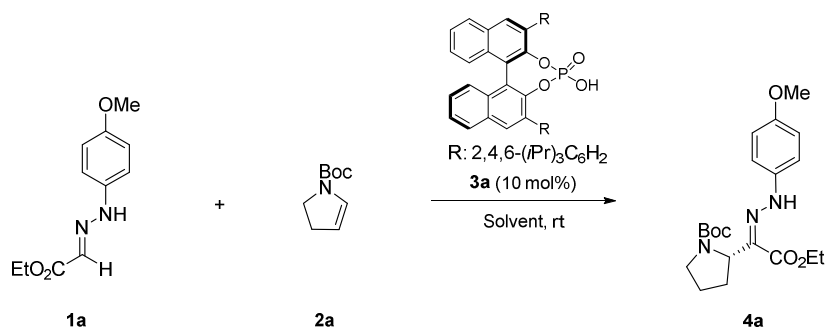

| Entry | Solvent                             | Yield <sup>b</sup> | e.e. <sup>c</sup> |
|-------|-------------------------------------|--------------------|-------------------|
| 1     | <b>Toluene</b>                      | <b>54</b>          | <b>68</b>         |
| 2     | <b>Benzene</b>                      | 53                 | 65                |
| 3     | <b><i>o</i>-Xylene</b>              | 43                 | 67                |
| 4     | <b>CH<sub>2</sub>Cl<sub>2</sub></b> | 52                 | 49                |
| 5     | <b>CHCl<sub>3</sub></b>             | 27                 | 26                |
| 6     | <b>EtOAc</b>                        | 83                 | 57                |

<sup>a</sup> The reaction was performed in 0.26 mL of toluene and 0.13 mmol of **2a**, using 1.2 eq. of **1a** at rt. <sup>b</sup> Yield of pure product isolated after flash chromatography. <sup>c</sup> Determined by HPLC analysis of the pure product.

**Table SI-3.** Influence of temperature and drying agents in the reaction <sup>a</sup>

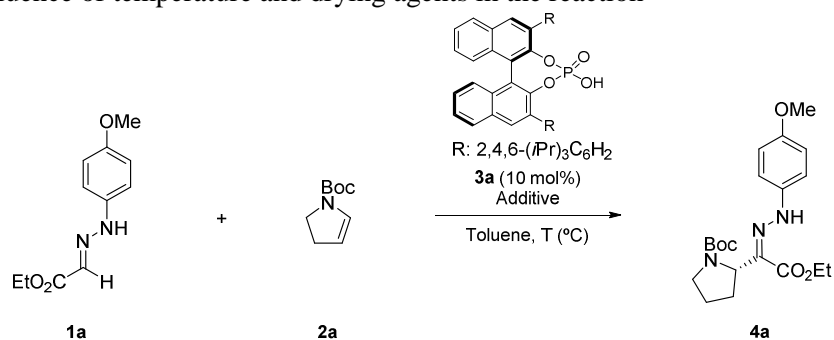

| Entry              | T (°C) | Additive          | Yield <sup>b</sup> | e.e. <sup>c</sup> |
|--------------------|--------|-------------------|--------------------|-------------------|
| 1                  | rt     | -                 | 54                 | 68                |
| 2                  | -5     | -                 | 43                 | 74                |
| 3                  | -15    | -                 | 30                 | 71                |
| 4                  | -20    | -                 | -                  | -                 |
| 5 <sup>d</sup>     | -5     | MgSO <sub>4</sub> | 45                 | 76                |
| 6 <sup>d</sup>     | -5     | 4 Å MS            | 40                 | 82                |
| 7 <sup>d,e</sup>   | -5     | 4 Å MS            | 42                 | 86                |
| 8 <sup>d,e,f</sup> | -5     | 4 Å MS            | <b>60</b>          | <b>86</b>         |

<sup>a</sup> The reaction was performed in 0.26 mL of toluene and 0.13 mmol scale of **2a**, using 1.2 eq. of **1a** for 14h. <sup>b</sup> Yield of pure product isolated after flash chromatography. <sup>c</sup> Determined by HPLC analysis of the pure product. <sup>d</sup> 27 mg of additive was added. <sup>e</sup> Reaction carried out with dry toluene. <sup>f</sup> Reaction carried out for 24h.

### 3. Experimental Procedures and Characterizations

#### 3.1. General structures of Hydrazones 1a-t

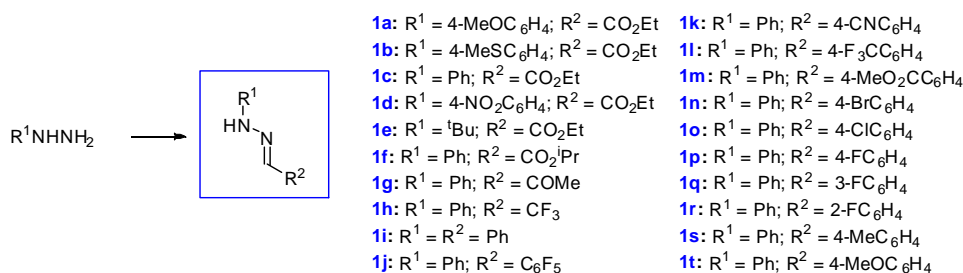

**Scheme SI-1.** Structure of hydrazones **1a-t**

Hydrazone **1g** is commercially available. Hydrazones **1a**,<sup>9</sup> **1c**,<sup>9</sup> **1d**,<sup>9</sup> **1h**,<sup>10</sup> **1j**,<sup>11</sup> and **1s**,<sup>12</sup> were synthesized according to the literature procedures, and spectroscopic data were in agreement with those reported in the literature.

#### General Procedures for the Synthesis of Hydrazones **1b**, **1e-f**, **1j-r** and **1t**

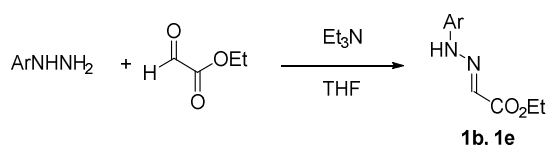

**Scheme SI-2.** Synthesis of hydrazones **1b**, **1e**

**General Procedure A (GP-A).** Hydrazone derivatives **1b** and **1e** were prepared according to literature procedure<sup>9</sup> as followed. A suspension of the corresponding hydrazine hydrochloride (28.65 mmol, 1.0 eq.) in anhydrous tetrahydrofuran (40 mL) was treated with triethylamine (28.65 mmol, 1.0 eq.) before the corresponding aldehyde (28.65 mmol, 1.0 eq.) was added dropwise to the reaction mixture at 0 °C. The mixture was stirred at this temperature for 30 minutes and then for 12 h at room temperature. The crude was filtered under vacuum and the filtrates were concentrated *in vacuo*. The resulting solids were dissolved in dichloromethane (~30 mL) and washed with HCl 1M (2 × 20 mL) and water (2 × 20 mL). The resulting organic layer was dried over Na<sub>2</sub>SO<sub>4</sub> and concentrated *in vacuo*. The resulting solids were triturated with diethyl ether or purified by flash column chromatography to obtain the desired hydrazone.

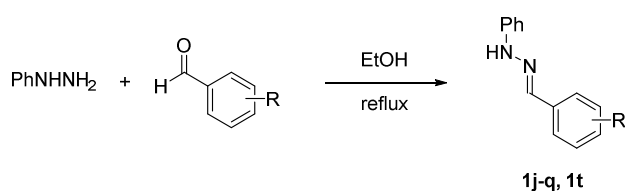

**Scheme SI-3.** Synthesis of hydrazones **1j-q**, **1t**

**General Procedure B (GP-B).** Hydrazone derivatives **1j-r** and **1t** were prepared according to literature procedure with some modifications.<sup>13</sup> The corresponding aldehyde (9.25 mmol, 1.0 eq.) was added to a solution of hydrazine (9.25 mmol, 1.0 eq.) in ethanol (9.25 mL). The mixture was stirred and heated to reflux for 3 hours. The precipitated hydrazone was filtered, washed with EtOH, dried and used without further purification.

<sup>9</sup> Fernández, M.; Uria, U.; Vicario, J. L.; Reyes, L.; Carrillo, L. *J. Am. Chem. Soc.* **2012**, *134*, 11872.

<sup>10</sup> Wojciechowska, A.; Jasiński, M.; Kaszyński, P. *Tetrahedron*, **2015**, *71*, 2349.

<sup>11</sup> Chang, M.-C.; Otten, E. *Chem. Commun.* **2014**, *50*, 7431.

<sup>12</sup> Xu, P.; Wang, G.; Zhu, Y.; Li, W.; Cheng, Y.; Li, S.; Zhu, C. *Angew. Chem., Int. Ed.* **2016**, *55*, 2939.

<sup>13</sup> Chen, Z.; Li, H.; Dong, W.; Miao, M.; Ren, H. *Org. Lett.* **2016**, *18*, 1334.

Procedures for the synthesis of hydrazones **If** and **Ii**. Individual procedures are indicated in each case.

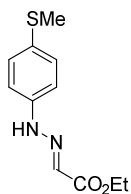

**Ethyl (E)-2-[2-[4-(methylthio)phenyl]hydrazono]acetate (1b).** Following *GP-A*, **1b** (936 mg, 3.9 mmol) was isolated by FC (hexanes/EtOAc gradient from 19:1 to 7:3) in 75% yield as a yellow solid starting from ethyl glyoxylate (50% *w/v* solution in toluene, 1.04 mL, 5.24 mmol), triethylamine (0.73 mL, 5.24 mmol) and 4-(methylthio)phenylhydrazine hydrochloride (1.0 g, 5.24 mmol) in anhydrous tetrahydrofuran (10 mL).  $R_f$ : 0.59 (hexanes/EtOAc 7:3).  $^1\text{H NMR}$  (300 MHz,  $\text{CDCl}_3$ ):  $\delta$  8.45 (bs, 1H, NH), 7.24 (d,  $J = 8.7$  Hz, 2H,  $\text{C}_{\text{Ar}}\text{-H}$ ), 7.11 (d,  $J = 8.7$  Hz, 2H,  $\text{C}_{\text{Ar}}\text{-H}$ ), 7.06 (s, 1H, CH), 4.31 (q,  $J = 7.1$  Hz, 2H,  $\text{CH}_2$ ), 2.45 (s, 3H,  $\text{SCH}_3$ ), 1.35 (t,  $J = 7.1$  Hz, 3H,  $\text{CH}_3$ ).  $^{13}\text{C NMR}$  (75 MHz,  $\text{CDCl}_3$ ):  $\delta$  164.3 (COO), 140.8 ( $\text{C}_{\text{Ar}}\text{-C}$ ), 131.2 ( $\text{C}_{\text{Ar}}\text{-C}$ ), 129.4 ( $\text{C}_{\text{Ar}}\text{-H}$ ), 126.0 (CH), 114.8 ( $\text{C}_{\text{Ar}}\text{-H}$ ), 61.1 ( $\text{CH}_2$ ), 17.6 ( $\text{SCH}_3$ ), 14.5 ( $\text{CH}_3$ ). IR (ATR)  $\text{cm}^{-1}$ : 3253 (NH), 2959 (C-H), 1692 (C=O), 1537 (C=N). MS (EI)  $m/z$  (%): 238 ( $\text{M}^+$ , 61), 164 (22), 138 (100), 122 (12). HRMS: Calculated for  $[\text{C}_{11}\text{H}_{15}\text{N}_2\text{O}_2\text{S}]^+$ : 239.0854 [(M+H) $^+$ ]; found: 239.0853. M.p. ( $\text{CH}_2\text{Cl}_2$ ): 130-132  $^\circ\text{C}$ .

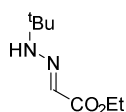

**Ethyl (E)-2-[2-(*tert*-butyl)hydrazono]acetate (1e).** Following *GP-B*, **1e** (315 mg, 1.83 mmol) was isolated by FC (hexanes/EtOAc gradient from 19:1 to 7:3) in 81% yield as a yellow solid starting from ethyl glyoxylate (50% *w/v* solution in toluene, 0.445 mL, 2.25 mmol), triethylamine (0.314 mL, 2.25 mmol) and *tert*-butylhydrazine hydrochloride (380 mg, 2.25 mmol) in anhydrous tetrahydrofuran (10 mL).  $R_f$ : 0.77 (hexanes/EtOAc 7:3).  $^1\text{H NMR}$  (300 MHz,  $\text{CDCl}_3$ ):  $\delta$  6.85 (s, 1H, CH), 6.29 (s, 1H, NH), 4.24 (q,  $J = 7.1$  Hz, 2H,  $\text{CH}_2$ ), 1.31 (t,  $J = 7.1$  Hz, 3H,  $\text{CH}_3$ ), 1.27 (s, 9H,  $\text{C}(\text{CH}_3)_3$ ).  $^{13}\text{C NMR}$  (75 MHz,  $\text{CDCl}_3$ ):  $\delta$  164.6 (COO), 123.3 (CH), 60.3 ( $\text{CH}_2$ ), 54.9 ( $\text{C}(\text{CH}_3)_3$ ), 28.8 ( $\text{C}(\text{CH}_3)_3$ ), 14.4 ( $\text{CH}_3$ ). IR (ATR)  $\text{cm}^{-1}$ : 3264 (NH), 2977 (C-H), 1691 (C=O), 1533 (C=N). MS (EI)  $m/z$  (%): 172 ( $\text{M}^+$ , 29), 157 (100), 115 (94), 87 (81), 83 (46), 72 (12), 57 (67). HRMS: Calculated for  $[\text{C}_8\text{H}_{17}\text{N}_2\text{O}_2]^+$ : 173.1290 [(M+H) $^+$ ]; found: 173.1286. M.p. ( $\text{CH}_2\text{Cl}_2$ ): 60-62  $^\circ\text{C}$ .

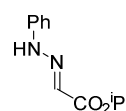

**Isopropyl-(E)-2-(2-phenylhydrazono)acetate (1f).**<sup>9</sup> To a suspension of phenylhydrazine (1.4 g, 12.9 mmol) in anhydrous tetrahydrofuran (12.9 mL) isopropyl glyoxylate (1.5 g, 12.9 mmol) was added dropwise at 0  $^\circ\text{C}$ . The mixture was stirred at this temperature for 30 minutes and then for 12 hours at room temperature. Solvents were removed *in vacuo* and the resulting solid was purified by flash column chromatography (hexanes/EtOAc gradient from 19:1 to 7:3) to afford **1f** (1.4 g, 6.8 mmol, 53%) as a light brown solid.  $R_f$ : 0.55 (hexanes/EtOAc 7:3).  $^1\text{H NMR}$  (300 MHz,  $\text{CDCl}_3$ ): (8:1 *E/Z* ratio, \*denotes minor isomer resonances)  $\delta$  8.61 (bs, 1H, NH), 7.32-7.23 (m, 2H,  $\text{C}_{\text{Ar}}\text{-H}$ ), 7.22-7.11 (m, 2H,  $\text{C}_{\text{Ar}}\text{-H}$ ), 7.07 (s, 1H, NCH), 6.97 (t,  $J = 7.3$  Hz, 1H,  $\text{C}_{\text{Ar}}\text{-H}$ ), 5.30-5.02 (m, 1H,  $\text{CH}(\text{CH}_3)_2$ ), 1.32 (d,  $J = 6.3$  Hz, 6H,  $\text{CH}(\text{CH}_3)_2$ ).  $^{13}\text{C NMR}$  (75 MHz,  $\text{CDCl}_3$ ):  $\delta$  163.6 (COO), 143.1 ( $\text{C}_{\text{Ar}}\text{-C}$ ), 142.7\* ( $\text{C}_{\text{Ar}}\text{-C}$ ), 129.5 ( $\text{C}_{\text{Ar}}\text{-H}$ ), 126.4\* (NCH), 122.7 ( $\text{C}_{\text{Ar}}\text{-H}$ ), 122.5\* ( $\text{C}_{\text{Ar}}\text{-H}$ ), 119.1 (NCH), 114.1\* ( $\text{C}_{\text{Ar}}\text{-H}$ ), 114.0 ( $\text{C}_{\text{Ar}}\text{-H}$ ), 68.5\* ( $\text{CH}(\text{CH}_3)_2$ ), 68.3 ( $\text{CH}(\text{CH}_3)_2$ ), 22.1\* ( $\text{CH}(\text{CH}_3)_2$ ), 22.0 ( $\text{CH}(\text{CH}_3)_2$ ). IR (ATR)  $\text{cm}^{-1}$ : 3255 (NH), 3052 (C-H), 1689 (C=O), 1539 (C=N). MS (EI)  $m/z$  (%): 206 ( $\text{M}^+$ , 54), 164 (56), 118 (100), 91 (94), 77 (22), 65 (43), 51 (9). HRMS: Calculated for  $[\text{C}_{11}\text{H}_{15}\text{N}_2\text{O}_2]^+$ : 207.1134 [(M+H) $^+$ ]; found: 207.1136. M.p. (EtOH): 124-126  $^\circ\text{C}$ .

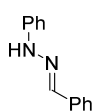

**(E)-1-benzylidene-2-phenylhydrazine (1i).**<sup>14</sup> To a solution of phenylhydrazine (0.91 mL, 9.25 mmol) in MeOH (8 mL) was added benzaldehyde (0.9 mL, 8.8 mmol) slowly. The mixture was stirred at room temperature for 6h. MeOH was evaporated *in vacuo*, and the residue was recrystallized from MeOH to afford (*E*)-1-benzylidene-2-phenylhydrazine **1i** (1.36 g, 6.9 mmol) in 79% yield as a light yellow solid.  $R_f$ : 0.9 (hexanes/EtOAc 7:3).  $^1\text{H NMR}$  (300 MHz,  $\text{CDCl}_3$ ):  $\delta$  7.73-7.64 (m, 3H, CH +  $\text{C}_{\text{Ar}}\text{-H}$ ), 7.59 (bs, 1H, NH), 7.44-7.25 (m, 5H,  $\text{C}_{\text{Ar}}\text{-H}$ ), 7.14 (d,  $J = 7.7$  Hz, 2H,  $\text{C}_{\text{Ar}}\text{-H}$ ), 6.90 (t,  $J = 7.3$  Hz, 1H,  $\text{C}_{\text{Ar}}\text{-H}$ ).  $^{13}\text{C NMR}$  (75 MHz,  $\text{CDCl}_3$ ):  $\delta$  144.8 ( $\text{C}_{\text{Ar}}\text{-C}$ ), 137.4 (CH), 135.4 ( $\text{C}_{\text{Ar}}\text{-C}$ ), 129.4 ( $\text{C}_{\text{Ar}}\text{-H}$ ), 128.7 ( $\text{C}_{\text{Ar}}\text{-H}$ ), 128.6 ( $\text{C}_{\text{Ar}}\text{-H}$ ), 126.3 ( $\text{C}_{\text{Ar}}\text{-H}$ ), 120.2 ( $\text{C}_{\text{Ar}}\text{-H}$ ), 112.9 ( $\text{C}_{\text{Ar}}\text{-H}$ ). IR (ATR)  $\text{cm}^{-1}$ : 3313 (NH), 2924 (C-H), 1592 (CN). MS (EI)  $m/z$  (%): 196 ( $\text{M}^+$ , 100), 103 (51), 92 (43), 77 (41), 65 (30), 51 (24). HRMS: Calculated for  $[\text{C}_{13}\text{H}_{13}\text{N}_2]^+$ : 197.1079 [(M+H) $^+$ ]; found: 197.1078. M.p. (EtOH): 155-157  $^\circ\text{C}$ .

<sup>14</sup> Yatham, V. R.; Harnying, W.; Kootz D.; Neudörfel, J. M.; Schlörer, N. E.; Berkessel, A. *J. Am. Chem. Soc.* **2016**, *138*, 2670.

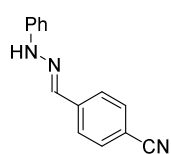

**(E)-4-[(2-phenylhydrazono)methyl]benzonitrile (1k).** Following *GP-B*, **1k** (1.7 g, 7.7 mmol) was isolated in 83% yield as a yellow solid starting from 4-formylbenzonitrile (1.27 g, 9.25 mmol) and phenylhydrazine (0.91 mL, 9.25 mmol) in ethanol (9.25 mL). *R*<sub>f</sub>: 0.36 (hexanes/EtOAc 7:3). <sup>1</sup>H NMR (300 MHz, CDCl<sub>3</sub>): δ 7.69 (bs, 1H, NH), 7.77-7.69 (m, 2H, C<sub>Ar</sub>-H), 7.68-7.59 (m, 3H, CH + C<sub>Ar</sub>-H), 7.31 (ddd, *J* = 8.5, 5.5, 1.7 Hz, 2H, C<sub>Ar</sub>-H), 7.18-7.10 (m, 2H, C<sub>Ar</sub>-H), 6.99-6.90 (m, 1H, C<sub>Ar</sub>-H). <sup>13</sup>C NMR (75 MHz, CDCl<sub>3</sub>): δ 143.9 (C<sub>Ar</sub>-C), 139.9 (C<sub>Ar</sub>-C), 134.4 (CH), 132.5 (C<sub>Ar</sub>-H), 129.5 (C<sub>Ar</sub>-H), 126.4 (C<sub>Ar</sub>-H), 121.2 (C<sub>Ar</sub>-H), 119.2 (CN), 113.2 (C<sub>Ar</sub>-H), 111.1 (C<sub>Ar</sub>-C). IR (ATR) cm<sup>-1</sup>: 3273 (NH), 3038 (C-H), 2221 (*p*-CN), 1577 (C=N). MS (EI) *m/z* (%): 221 (M<sup>+</sup>, 66), 207 (38), 128 (100), 102 (13), 92 (66), 77 (13), 65 (27), 51 (14). HRMS: Calculated for [C<sub>14</sub>H<sub>12</sub>N<sub>3</sub>]<sup>+</sup>: 222.1031 [(M+H)<sup>+</sup>]; found: 222.1021. M.p. (EtOH): 151-153 °C.

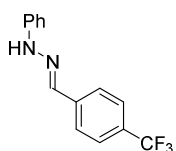

**(E)-1-phenyl-2-[4-(trifluoromethyl)benzylidene]hydrazine (1l).** Following *GP-B*, **1l** (1.35 g, 5.1 mmol) was isolated in 55% yield as a light yellow solid starting from 4-(trifluoromethyl)benzaldehyde (1.3 g, 9.25 mmol) and phenylhydrazine (0.91 mL, 9.25 mmol) in ethanol (9.25 mL). *R*<sub>f</sub>: 0.68 (hexanes/EtOAc 7:3). <sup>1</sup>H NMR (300 MHz, CDCl<sub>3</sub>): δ 7.79-7.70 (m, 3H, NH + C<sub>Ar</sub>-H), 7.67-7.57 (m, 3H, CH + C<sub>Ar</sub>-H), 7.32 (ddd, *J* = 8.6, 5.7, 2.2 Hz, 2H, C<sub>Ar</sub>-H), 7.18-7.10 (m, 2H, C<sub>Ar</sub>-H), 6.94 (t, *J* = 7.3 Hz, 1H, C<sub>Ar</sub>-H). <sup>13</sup>C NMR (75 MHz, CDCl<sub>3</sub>): δ 144.2 (C<sub>Ar</sub>-C), 138.9 (C<sub>Ar</sub>-C), 135.3 (CH), 129.9 (q, <sup>2</sup>*J*<sub>C-F</sub> = 32.1 Hz, CCF<sub>3</sub>), 129.5 (C<sub>Ar</sub>-H), 126.2 (C<sub>Ar</sub>-H), 125.7 (q, <sup>3</sup>*J*<sub>C-F</sub> = 3.9 Hz, C<sub>Ar</sub>-H), 122.9 (q, <sup>1</sup>*J*<sub>C-F</sub> = 272.5 Hz, CF<sub>3</sub>), 120.9 (C<sub>Ar</sub>-H), 113.1 (C<sub>Ar</sub>-H). <sup>19</sup>F NMR (300 MHz, CDCl<sub>3</sub>): δ -62.5 (CF<sub>3</sub>). IR (ATR) cm<sup>-1</sup>: 3292 (NH), 1594 (C=N). MS (EI) *m/z* (%): 264 (M<sup>+</sup>, 100), 207 (13), 171 (78), 152 (36), 121 (44), 92 (88), 75 (20), 65 (37), 51 (17). HRMS: Calculated for [C<sub>14</sub>H<sub>12</sub>N<sub>2</sub>F<sub>3</sub>]<sup>+</sup>: 265.0953 [(M+H)<sup>+</sup>]; found: 265.0948. M.p. (EtOH): 132-134 °C.

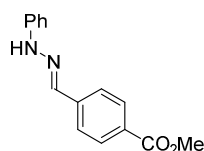

**Methyl (E)-4-[(2-phenylhydrazono)methyl]benzoate (1m).** Following *GP-B*, **1m** (1.9 g, 7.5 mmol) was isolated in 80% yield as a yellow solid starting from methyl 4-formylbenzoate (1.53 g, 9.25 mmol) and phenylhydrazine (0.91 mL, 9.25 mmol) in ethanol (9.25 mL). *R*<sub>f</sub>: 0.42 (hexanes/EtOAc 8:2). <sup>1</sup>H NMR (300 MHz, CDCl<sub>3</sub>): δ 8.03 (d, *J* = 8.4 Hz, 2H, C<sub>Ar</sub>-H), 7.82 (bs, 1H, NH), 7.78-7.63 (m, 3H, CH + C<sub>Ar</sub>-H), 7.36-7.24 (m, 2H, C<sub>Ar</sub>-H), 7.19-7.09 (m, 2H, C<sub>Ar</sub>-H), 6.91 (t, *J* = 7.3 Hz, 1H, C<sub>Ar</sub>-H), 3.93 (s, 3H, CH<sub>3</sub>). <sup>13</sup>C NMR (75 MHz, CDCl<sub>3</sub>): δ 167.0 (COO), 144.2 (C<sub>Ar</sub>-C), 139.9 (C<sub>Ar</sub>-C), 135.7 (CH), 130.0 (C<sub>Ar</sub>-H), 129.5 (C<sub>Ar</sub>-H), 125.9 (C<sub>Ar</sub>-H), 120.7 (C<sub>Ar</sub>-H), 113.0 (C<sub>Ar</sub>-H), 52.2 (CH<sub>3</sub>). IR (ATR) cm<sup>-1</sup>: 3288 (NH), 3042 (C-H), 1690 (C=O), 1578 (C=N). MS (EI) *m/z* (%): 254 (M<sup>+</sup>, 83), 207 (28), 161 (26), 130 (100), 102 (40), 92 (57), 77 (19), 65 (26), 51 (18). HRMS: Calculated for [C<sub>15</sub>H<sub>15</sub>N<sub>2</sub>O<sub>2</sub>]<sup>+</sup>: 255.1134 [(M+H)<sup>+</sup>]; found: 255.1132. M.p. (EtOH): 142-144 °C.

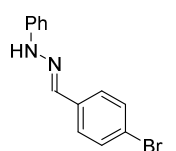

**(E)-1-(4-bromobenzylidene)-2-phenylhydrazine (1n).** Following *GP-B*, **1n** (1.1 g, 3.99 mmol) was isolated in 49% yield as a light yellow solid starting from 4-bromobenzaldehyde (1.52 g, 8.1 mmol) and phenylhydrazine (0.8 mL, 8.1 mmol) in ethanol (8.1 mL). *R*<sub>f</sub>: 0.56 (hexanes/EtOAc 7:3). <sup>1</sup>H NMR (300 MHz, CDCl<sub>3</sub>): δ 7.64 (s, 1H, NH), 7.60 (s, 1H, CH), 7.56-7.46 (m, 4H, C<sub>Ar</sub>-H), 7.33-7.24 (m, 2H, C<sub>Ar</sub>-H), 7.11 (d, *J* = 8.5 Hz, 2H, C<sub>Ar</sub>-H), 6.95-6.86 (m, 1H, C<sub>Ar</sub>-H). <sup>13</sup>C NMR (75 MHz, CDCl<sub>3</sub>): δ 144.5 (C<sub>Ar</sub>-C), 136.0 (CH), 134.4 (C<sub>Ar</sub>-C), 131.9 (C<sub>Ar</sub>-H), 129.5 (C<sub>Ar</sub>-H), 127.7 (C<sub>Ar</sub>-H), 122.3 (C<sub>Ar</sub>-C), 120.5 (C<sub>Ar</sub>-H), 113.0 (C<sub>Ar</sub>-H). IR (ATR) cm<sup>-1</sup>: 3308 (NH), 3051 (C-H), 1591 (C=N). MS (EI) *m/z* (%): 274 (M<sup>+</sup>, 91), 207 (93), 183 (100), 102 (69), 92 (95), 75 (37), 65 (47), 51 (27). HRMS: Calculated for [C<sub>13</sub>H<sub>12</sub>N<sub>2</sub>Br]<sup>+</sup>: 275.0184 [(M+H)<sup>+</sup>]; found: 275.0185. M.p. (EtOH): 120-122 °C.

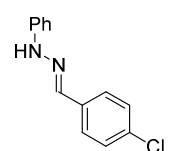

**(E)-1-(4-chlorobenzylidene)-2-phenylhydrazine (1o).** Following *GP-B*, **1o** (1.35 g, 5.9 mmol) was isolated in 63% yield as a white solid starting from 4-chlorobenzaldehyde (1.32 g, 9.25 mmol) and phenylhydrazine (0.91 mL, 9.25 mmol) in ethanol (9.25 mL). *R*<sub>f</sub>: 0.64 (hexanes/EtOAc 8:2). <sup>1</sup>H NMR (300 MHz, CDCl<sub>3</sub>): δ 7.66-7.54 (m, 4H, NH + CH + C<sub>Ar</sub>-H), 7.38-7.24 (m, 4H, C<sub>Ar</sub>-H), 7.11 (d, *J* = 7.6 Hz, 2H, C<sub>Ar</sub>-H), 6.90 (t, *J* = 7.3 Hz, 1H, C<sub>Ar</sub>-H). <sup>13</sup>C NMR (75 MHz, CDCl<sub>3</sub>): δ 144.5 (C<sub>Ar</sub>-C), 135.9 (CH), 134.1 (C<sub>Ar</sub>-C), 134.0 (C<sub>Ar</sub>-C), 129.5 (C<sub>Ar</sub>-H), 129.0 (C<sub>Ar</sub>-H), 127.4 (C<sub>Ar</sub>-H), 120.5 (C<sub>Ar</sub>-H), 112.9 (C<sub>Ar</sub>-H). IR (ATR) cm<sup>-1</sup>: 3312 (NH), 3055 (C-H), 1598 (C=N), 747 (CCl). MS (EI) *m/z* (%): 230 (M<sup>+</sup>, 66), 207 (57), 137 (100), 102 (30), 92 (54), 65 (24). HRMS: Calculated for [C<sub>13</sub>H<sub>12</sub>N<sub>2</sub>Cl]<sup>+</sup>: 231.0689 [(M+H)<sup>+</sup>]; found: 231.0689. M.p. (EtOH): 126-128 °C.

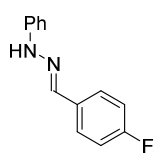

**(E)-1-(4-fluorobenzylidene)-2-phenylhydrazine (1p).** Following *GP-B*, **1p** (1.28 g, 5.97 mmol) was isolated in 65% yield as a white solid starting from 4-fluorobenzaldehyde (1.32 g, 9.25 mmol) and phenylhydrazine (0.91 mL, 9.25 mmol) in ethanol (9.25 mL).  $R_f$ : 0.64 (hexanes/EtOAc 8:2).  $^1\text{H NMR}$  (300 MHz,  $\text{CDCl}_3$ ):  $\delta$  7.70-7.49 (m, 4H, NH + CH +  $\text{C}_{\text{Ar}}\text{-H}$ ), 7.29 (t,  $J = 7.9$  Hz, 2H,  $\text{C}_{\text{Ar}}\text{-H}$ ), 7.16-7.00 (m, 4H,  $\text{C}_{\text{Ar}}\text{-H}$ ), 6.89 (t,  $J = 6.8$  Hz, 1H,  $\text{C}_{\text{Ar}}\text{-H}$ ).  $^{13}\text{C NMR}$  (75 MHz,  $\text{CDCl}_3$ ):  $\delta$  163.0 (d,  $^1J_{\text{C-F}} = 248.2$  Hz, CF), 144.7 ( $\text{C}_{\text{Ar}}\text{-C}$ ), 136.3 (CH), 131.7 (d,  $^4J_{\text{C-F}} = 3.2$  Hz,  $\text{C}_{\text{Ar}}\text{-C}$ ), 129.5 ( $\text{C}_{\text{Ar}}\text{-H}$ ), 127.9 (d,  $^3J_{\text{C-F}} = 8.1$  Hz,  $\text{C}_{\text{Ar}}\text{-H}$ ), 120.4 ( $\text{C}_{\text{Ar}}\text{-H}$ ), 116.0 (d,  $^2J_{\text{C-F}} = 21.9$  Hz,  $\text{C}_{\text{Ar}}\text{-H}$ ), 112.9 ( $\text{C}_{\text{Ar}}\text{-H}$ ).  $^{19}\text{F NMR}$  (282 MHz,  $\text{CDCl}_3$ ):  $\delta$  -112.7 (CF). IR (ATR)  $\text{cm}^{-1}$ : 3311 (NH), 3053 (C-H), 1597 (C=N), 1230 (CF). MS (EI)  $m/z$  (%): 214 ( $\text{M}^+$ , 87), 121 (100), 92 (52), 77 (11), 65 (27), 51 (9). HRMS: Calculated for  $[\text{C}_{13}\text{H}_{12}\text{N}_2\text{F}]^+$ : 215.0985  $[(\text{M}+\text{H})^+]$ ; found: 215.0988. M.p. (EtOH): 145-147 °C.

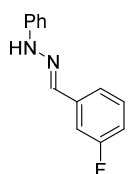

**(E)-1-(3-fluorobenzylidene)-2-phenylhydrazine (1q).** Following *GP-B*, **1q** (1.4 g, 6.5 mmol) was isolated in 81% yield as a light yellow solid starting from 3-fluorobenzaldehyde (0.88 mL, 8.1 mmol) and phenylhydrazine (0.8 mL, 8.1 mmol) in ethanol (8.1 mL).  $R_f$ : 0.86 (hexanes/EtOAc 7:3).  $^1\text{H NMR}$  (300 MHz,  $\text{CDCl}_3$ ):  $\delta$  7.68 (bs, 1H, NH), 7.63 (s, 1H, CH), 7.49-7.25 (m, 5H,  $\text{C}_{\text{Ar}}\text{-H}$ ), 7.20-7.08 (m, 2H,  $\text{C}_{\text{Ar}}\text{-H}$ ), 7.04-7.95 (m, 1H,  $\text{C}_{\text{Ar}}\text{-H}$ ), 6.91 (t,  $J = 7.3$  Hz, 1H,  $\text{C}_{\text{Ar}}\text{-H}$ ).  $^{13}\text{C NMR}$  (75 MHz,  $\text{CDCl}_3$ ):  $\delta$  163.3 (d,  $^1J_{\text{C-F}} = 245.3$  Hz, CF), 144.4 ( $\text{C}_{\text{Ar}}\text{-C}$ ), 137.8 (d,  $^3J_{\text{C-F}} = 8.0$  Hz,  $\text{C}_{\text{Ar}}\text{-C}$ ), 135.8 (d,  $^4J_{\text{C-F}} = 3.2$  Hz, CH), 130.2 (d,  $^3J_{\text{C-F}} = 8.4$  Hz,  $\text{C}_{\text{Ar}}\text{-H}$ ), 129.5 ( $\text{C}_{\text{Ar}}\text{-H}$ ), 122.3 (d,  $^4J_{\text{C-F}} = 2.7$  Hz,  $\text{C}_{\text{Ar}}\text{-H}$ ), 120.6 ( $\text{C}_{\text{Ar}}\text{-H}$ ), 115.3 (d,  $^2J_{\text{C-F}} = 21.7$  Hz,  $\text{C}_{\text{Ar}}\text{-H}$ ), 113.0 ( $\text{C}_{\text{Ar}}\text{-H}$ ), 112.4 (d,  $^2J_{\text{C-F}} = 22.8$  Hz,  $\text{C}_{\text{Ar}}\text{-H}$ ).  $^{19}\text{F NMR}$  (282 MHz,  $\text{CDCl}_3$ ):  $\delta$  -113.2 (CF). IR (ATR)  $\text{cm}^{-1}$ : 3311 (NH), 3008 (C-H), 1594 (C=N), 1262 (CF). MS (EI)  $m/z$  (%): 214 ( $\text{M}^+$ , 100), 121 (88), 107 (11), 92 (75), 75 (18), 65 (37), 51 (14). HRMS: Calculated for  $[\text{C}_{13}\text{H}_{12}\text{N}_2\text{F}]^+$ : 215.0985  $[(\text{M}+\text{H})^+]$ ; found: 215.0981. M.p. (EtOH): 115-117 °C.

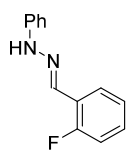

**(E)-1-(2-fluorobenzylidene)-2-phenylhydrazine (1r).** Following *GP-B*, **1r** (1.7 g, 7.9 mmol) was isolated in 98% yield as an orange solid starting from 2-fluorobenzaldehyde (0.88 mL, 8.1 mmol) and phenylhydrazine (0.8 mL, 8.1 mmol) in ethanol (8.1 mL).  $R_f$ : 0.78 (hexanes/EtOAc 8:2).  $^1\text{H NMR}$  (300 MHz,  $\text{CDCl}_3$ ):  $\delta$  8.01 (td,  $J = 7.6, 1.8$  Hz, 1H,  $\text{C}_{\text{Ar}}\text{-H}$ ), 7.94 (s, 1H, CH), 7.77 (bs, 1H, NH), 7.36-7.22 (m, 3H,  $\text{C}_{\text{Ar}}\text{-H}$ ), 7.20-7.10 (m, 3H,  $\text{C}_{\text{Ar}}\text{-H}$ ), 7.10-7.00 (m, 1H,  $\text{C}_{\text{Ar}}\text{-H}$ ), 6.89 (t,  $J = 7.3$  Hz, 1H,  $\text{C}_{\text{Ar}}\text{-H}$ ).  $^{13}\text{C NMR}$  (75 MHz,  $\text{CDCl}_3$ ):  $\delta$  160.6 (d,  $^1J_{\text{C-F}} = 249.5$  Hz, CF), 114.5 ( $\text{C}_{\text{Ar}}\text{-C}$ ), 130.2 (d,  $^3J_{\text{C-F}} = 4.9$  Hz, CH), 129.7 (d,  $^3J_{\text{C-F}} = 8.2$  Hz,  $\text{C}_{\text{Ar}}\text{-H}$ ), 129.5 ( $\text{C}_{\text{Ar}}\text{-H}$ ), 126.3 (d,  $^4J_{\text{C-F}} = 3.1$  Hz,  $\text{C}_{\text{Ar}}\text{-H}$ ), 124.4 (d,  $^3J_{\text{C-F}} = 3.4$  Hz,  $\text{C}_{\text{Ar}}\text{-H}$ ), 123.3 (d,  $^2J_{\text{C-F}} = 10.2$  Hz,  $\text{C}_{\text{Ar}}\text{-C}$ ), 120.5 ( $\text{C}_{\text{Ar}}\text{-H}$ ), 115.7 (d,  $^2J_{\text{C-F}} = 21.0$  Hz,  $\text{C}_{\text{Ar}}\text{-H}$ ), 112.9 ( $\text{C}_{\text{Ar}}\text{-H}$ ).  $^{19}\text{F NMR}$  (282 MHz,  $\text{CDCl}_3$ ):  $\delta$  -122.5 (CF). IR (ATR)  $\text{cm}^{-1}$ : 3307 (NH), 3055 (C-H), 1598 (C=N), 1258 (CF). MS (EI)  $m/z$  (%): 214 ( $\text{M}^+$ , 99), 121 (100), 107 (11), 92 (65), 75 (21), 65 (35), 51 (13). HRMS: Calculated for  $[\text{C}_{13}\text{H}_{12}\text{N}_2\text{F}]^+$ : 215.0985  $[(\text{M}+\text{H})^+]$ ; found: 215.0982. M.p. (EtOH): 86-88 °C.

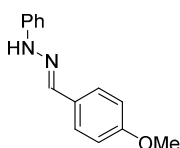

**(E)-1-(4-methoxybenzylidene)-2-phenylhydrazine (1t).** Following *GP-B*, **1t** (2.05 g, 8.0 mmol) was isolated in 99% yield as a white solid starting from 4-methoxybenzaldehyde (0.99 mL, 8.1 mmol) and phenylhydrazine (0.88 mL, 8.1 mmol) in ethanol (8.1 mL).  $R_f$ : 0.64 (hexanes/EtOAc 8:2).  $^1\text{H NMR}$  (300 MHz,  $\text{CDCl}_3$ ):  $\delta$  7.71-7.56 (m, 3H,  $\text{C}_{\text{Ar}}\text{-H}$ ), 7.48 (bs, 1H, NH), 7.33-7.23 (m, 2H,  $\text{C}_{\text{Ar}}\text{-H}$ ), 7.10 (d,  $J = 7.6$  Hz, 2H,  $\text{C}_{\text{Ar}}\text{-H}$ ), 6.98-6.81 (m, 3H, CH +  $\text{C}_{\text{Ar}}\text{-H}$ ), 3.84 (s, 3H,  $\text{OCH}_3$ ).  $^{13}\text{C NMR}$  (75 MHz,  $\text{CDCl}_3$ ):  $\delta$  160.1 ( $\text{C}_{\text{Ar}}\text{-C}$ ), 145.1 ( $\text{C}_{\text{Ar}}\text{-C}$ ), 137.5 (CH), 129.4 ( $\text{C}_{\text{Ar}}\text{-H}$ ), 128.3 ( $\text{C}_{\text{Ar}}\text{-C}$ ), 127.7 ( $\text{C}_{\text{Ar}}\text{-H}$ ), 119.9 ( $\text{C}_{\text{Ar}}\text{-H}$ ), 114.3 ( $\text{C}_{\text{Ar}}\text{-H}$ ), 112.8 ( $\text{C}_{\text{Ar}}\text{-H}$ ), 55.5 ( $\text{OCH}_3$ ). IR (ATR)  $\text{cm}^{-1}$ : 3314 (NH), 3024 (C-H), 1594 (C=N). MS (EI)  $m/z$  (%): 226 ( $\text{M}^+$ , 100), 207 (41), 133 (58), 107 (11), 92 (37), 77 (31), 65 (24), 51 (13). HRMS: Calculated for  $[\text{C}_{14}\text{H}_{15}\text{N}_2\text{O}]^+$ : 227.1184  $[(\text{M}+\text{H})^+]$ ; found: 227.1188. M.p. (EtOH): 145-147 °C.

### 3.2. General structures of Dihydropyrroles 2a-e and 5a-c

Cyclic enecarbamate **2a** is commercially available. Cyclic enamide **2b**<sup>15</sup> and cyclic enamine **2c**<sup>16</sup> were synthesized according to the literature procedures, and spectroscopic data were in agreement with those reported in the literature.

<sup>15</sup> Gerard, B.; O'shea, M. W.; Donckele, E.; Kesavan, S.; Akella, L. B.; Xu, H.; Jacobsen, E. N.; Marcaurelle, L. A. *ACS Comb. Sci.* **2012**, *14*, 621.



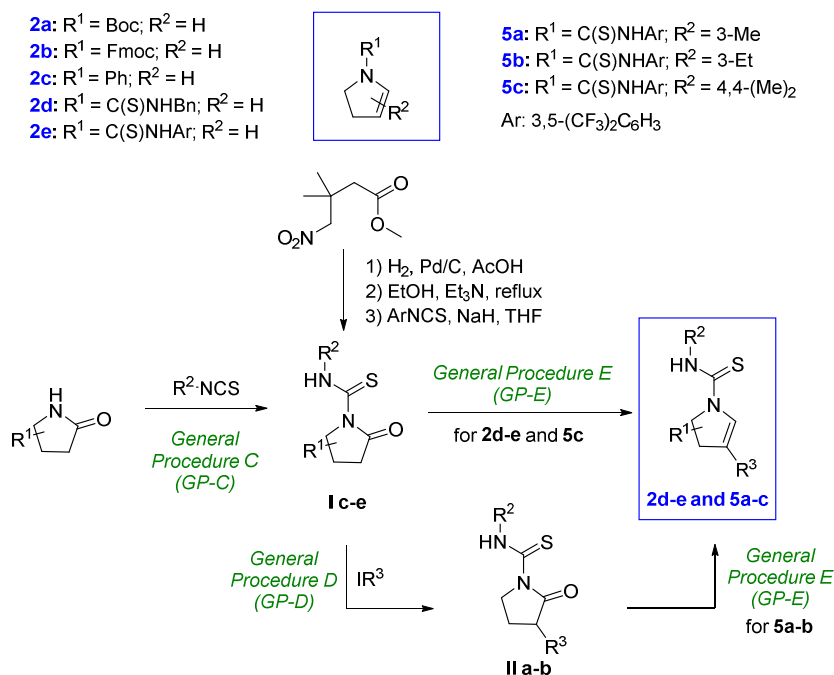

**Scheme SI-4.** General Overview of the Synthesis of **2d-e** and **5a-c**

**General Procedure C (GP-C).** Lactams **Ic-e** were prepared according to literature procedure<sup>17</sup> as followed. To a stirred solution of pyrrolidin-2-one (13.4 mmol, 1.0 eq.) in THF (60 mL) at 0 °C, was added portionwise NaH (60%, 20.1 mmol, 1.5 eq.). After stirring at 0 °C for 30 min, the corresponding isothiocyanate (20.1 mmol, 1.5 eq.) was slowly added at -78 °C and the reaction was stirred and allowed to warm to room temperature overnight. Then a solution of saturated NH<sub>4</sub>Cl was added to quench the reaction, and the mixture was extracted with EtOAc, and the organic layer was dried over Na<sub>2</sub>SO<sub>4</sub> and concentrated *in vacuo*. The crude product was then purified by flash column chromatography on silica gel. Spectroscopic data for lactam **Id**<sup>17</sup> was in agreement with the literature.

**General Procedure D (GP-D).** 3-substituted lactams **IIa-b** were prepared according to an adapted literature procedure<sup>18</sup> as followed. To a stirred solution of *N*-substituted-pyrrolidin-2-one (9.82 mmol, 1.0 eq.) in THF (47 mL) at -78 °C, was added dropwise a solution of lithium bis(trimethylsilyl)amide (LHMDS) (20.6 mmol, 2.1 eq.), followed by stirring for 1 hour. Then, iodomethane or iodoethane (9.82 mmol, 1.0 eq.) was dropwise added. Thereafter, the temperature was gradually raised to -30 °C for 2 hours. 50 mL of EtOAc was added to the solution, and the reaction solution was washed with aqueous NH<sub>4</sub>Cl, and the organic layer was dried over anhydrous Na<sub>2</sub>SO<sub>4</sub>. The solvent was evaporated under reduced pressure, then the residue was purified by flash column chromatography on silica gel.

**General Procedure E (GP-E).** Cyclic enthioureas **2d-e** and **5a-c** were prepared in two steps according to an adapted literature procedure<sup>17</sup> as followed. 1<sup>st</sup> step: A solution of *N*-substituted-lactams (6.4 mmol, 1.0 eq.) in tetrahydrofuran (15 mL) was cooled to -78 °C under argon atmosphere. Then super-hydride (1M in THF, 14.1 mmol, 1.1 eq.) was slowly added and the reaction was stirred for 30 min at -78 °C and 2 hours at room temperature. Then, a saturated aqueous solution of NaHCO<sub>3</sub> was added and the mixture was extracted with EtOAc (3 × 20 mL). The organic layer was dried over anhydrous Na<sub>2</sub>SO<sub>4</sub>, filtered and concentrated *in vacuo* to give the crude pyrrolidinol derivative which was purified by column chromatography (hexanes/EtOAc gradient from 19:1 to 7:3). 2<sup>nd</sup> step: To a solution of previously synthesized intermediates (3.33 mmol, 1.0 eq.) in a mixture of tetrahydrofuran/toluene (8 mL/16 mL) and cooled to -78 °C. Then, DMAP (0.128 mmol, 0.02 eq.), and trifluoroacetic anhydride (7.7 mmol, 1.2 eq.) were added. After 5 minutes Et<sub>3</sub>N (35.2 mmol, 5.5 eq.) was slowly added during 30 minutes and the reaction mixture was

<sup>16</sup> For the synthesis, see: Hyeok, S.; Sanders, D. P.; Lee, C. W.; Grubbs, R. H. *J. Am. Chem. Soc.* **2005**, *127*, 17160; For the spectroscopic data, see: Seto, Y.; Guengerich, F. P. *J. Biol. Chem.* **1993**, *268*, 9986.

<sup>17</sup> Dagousset, G.; Retailleau, P.; Masson, G.; Zhu, J. *Chem. Eur. J.* **2012**, *18*, 5869.

<sup>18</sup> Dieter, R. K.; Sharma, R. R. *J. Org. Chem.* **1996**, *61*, 4180.

allowed to warm to room temperature for 2 hours. Then, water was added, and the organic layer was dried over Na<sub>2</sub>SO<sub>4</sub> and concentrated *in vacuo*. The crude product was then purified by flash column chromatography on silica gel. Spectroscopic data for lactam **2d**<sup>17</sup> was in agreement with the literature.

*Procedure for the synthesis of lactam Ic* is indicated.

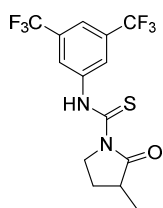

***N*-[3,5-bis(trifluoromethyl)phenyl]-3-methyl-2-oxopyrrolidine-1-carbothioamide (Ia).**

Following *GP-D*, **Ia** (3.5 g, 9.45 mmol) was isolated by FC (petroleum ether/EtOAc gradient from 19:1 to 7:3) in 96% yield as a colorless oil starting from *N*-3,5-bis(trifluoromethyl)phenylpyrrolidin-2-one (3.5 g, 9.82 mmol), lithium bis(trimethylsilyl)amide (20.6 mL, 20.6 mmol) and iodomethane (0.62 mL, 9.82 mmol) in THF (47 mL). R<sub>f</sub>: 0.78 (hexanes/EtOAc 7:3). <sup>1</sup>H NMR (300 MHz, CDCl<sub>3</sub>): δ 12.92 (bs, 1H, NH), 8.20 (s, 2H, C<sub>Ar</sub>-H), 7.72 (s, 1H, C<sub>Ar</sub>-H), 4.39 (ddd, *J* = 11.5, 8.9, 2.5 Hz, 1H, C<sub>5</sub>-H<sub>a</sub>), 3.99 (ddd, *J* = 11.5, 9.5, 7.5 Hz, 1H, C<sub>5</sub>-H<sub>b</sub>), 3.03-2.79 (m, 1H, C<sub>4</sub>-H<sub>a</sub>), 2.41-2.16 (m, 1H, C<sub>4</sub>-H<sub>b</sub>), 1.81-1.64 (m, 1H, C<sub>3</sub>-H), 1.32 (d, *J* = 7.0 Hz, 3H, CH<sub>3</sub>). <sup>13</sup>C NMR (75 MHz, CDCl<sub>3</sub>): δ 179.9 (C<sub>S</sub>), 179.5 (C<sub>2</sub>), 139.8 (C<sub>Ar</sub>-C), 132.2 (q, <sup>2</sup>*J*<sub>C-F</sub> = 33.7 Hz, CCF<sub>3</sub>), 124.2 (q, <sup>3</sup>*J*<sub>C-F</sub> = 2.9 Hz, C<sub>Ar</sub>-H), 123.1 (q, <sup>1</sup>*J*<sub>C-F</sub> = 272.8 Hz, CF<sub>3</sub>), 119.7 (q, <sup>3</sup>*J*<sub>C-F</sub> = 3.6 Hz, C<sub>Ar</sub>-H), 49.2 (C<sub>5</sub>), 40.6 (C<sub>3</sub>), 25.6 (C<sub>4</sub>), 15.5 (CH<sub>3</sub>). <sup>19</sup>F NMR (282 MHz, CDCl<sub>3</sub>): δ -63.0 (CF<sub>3</sub>). IR (ATR) cm<sup>-1</sup>: 2978 (NH), 2925 (C-H), 1703 (C=O), 1276 (C=S), 1126 (C-N). MS (EI) *m/z* (%): 271 (100), 252 (23), 213 (24), 202 (10), 163 (11), 143 (7), 99 (13), 56 (8). HRMS: Calculated for [C<sub>14</sub>H<sub>13</sub>N<sub>2</sub>OSF<sub>6</sub>]<sup>+</sup>: 371.0653 [(M+H)<sup>+</sup>]; found: 371.0649.

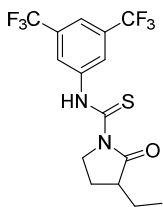

***N*-[3,5-bis(trifluoromethyl)phenyl]-3-ethyl-2-oxopyrrolidine-1-carbothioamide (Ib).**

Following *GP-D*, **Ib** (0.84 g, 2.19 mmol) was isolated by FC (petroleum ether/EtOAc gradient from 19:1 to 8:2) in 52% yield as a white solid starting from *N*-3,5-bis(trifluoromethyl)phenylpyrrolidin-2-one (1.5 g, 4.22 mmol), lithium bis(trimethylsilyl)amide (8.84 mL, 8.84 mmol) and iodoethane (0.342 mL, 4.22 mmol) in THF (20 mL). R<sub>f</sub>: 0.83 (hexanes/EtOAc 8:2). <sup>1</sup>H NMR (300 MHz, CDCl<sub>3</sub>): δ 12.94 (bs, 1H, NH), 8.20 (s, 2H, C<sub>Ar</sub>-H), 7.72 (s, 1H, C<sub>Ar</sub>-H), 4.39 (ddd, *J* = 11.8, 8.9, 3.1 Hz, 1H, C<sub>5</sub>-H<sub>a</sub>), 4.02 (ddd, *J* = 11.7, 9.0, 7.6 Hz, 1H, C<sub>5</sub>-H<sub>b</sub>), 2.79 (ddd, *J* = 18.5, 8.8, 4.8 Hz, 1H, C<sub>4</sub>-H<sub>a</sub>), 2.45-2.15 (m, 1H, C<sub>3</sub>-H), 2.11-1.87 (m, 1H, C<sub>4</sub>-H<sub>b</sub>), 1.87-1.68 (m, 1H, CH<sub>a</sub>H<sub>b</sub>CH<sub>3</sub>), 1.68-1.47 (m, 1H, CH<sub>a</sub>H<sub>b</sub>CH<sub>3</sub>), 1.05 (t, *J* = 7.5 Hz, 3H, CH<sub>3</sub>). <sup>13</sup>C NMR (75 MHz, CDCl<sub>3</sub>): δ 179.5 (C<sub>2</sub>), 179.3 (C<sub>S</sub>), 139.8 (C<sub>Ar</sub>-C), 132.2 (q, <sup>2</sup>*J*<sub>C-F</sub> = 33.5 Hz, CCF<sub>3</sub>), 124.3 (C<sub>Ar</sub>-H), 123.1 (q, <sup>1</sup>*J*<sub>C-F</sub> = 272.7 Hz, CF<sub>3</sub>), 119.7 (q, *J* = 3.2 Hz, C<sub>Ar</sub>-H), 49.4 (C<sub>5</sub>), 47.0 (C<sub>3</sub>), 23.8 (C<sub>4</sub>), 22.9 (CH<sub>2</sub>CH<sub>3</sub>), 11.4 (CH<sub>2</sub>CH<sub>3</sub>). <sup>19</sup>F NMR (282 MHz, CDCl<sub>3</sub>): δ -63.0 (CF<sub>3</sub>). IR (ATR) cm<sup>-1</sup>: 2977 (NH), 2877 (C-H), 1699 (C=O), 1274 (C=S), 1125 (C-N). MS (EI) *m/z* (%): 271 (100), 252 (25), 213 (26), 202 (12), 163 (13), 83 (35), 69 (10). HRMS: Calculated for [C<sub>15</sub>H<sub>15</sub>N<sub>2</sub>OSF<sub>6</sub>]<sup>+</sup>: 385.0809 [(M+H)<sup>+</sup>]; found: 385.0808. M.p. (CH<sub>2</sub>Cl<sub>2</sub>): 77-79 °C.

***N*-[3,5-bis(trifluoromethyl)phenyl]-4,4-dimethyl-2-oxopyrrolidine-1-carbothioamide (Ic).**

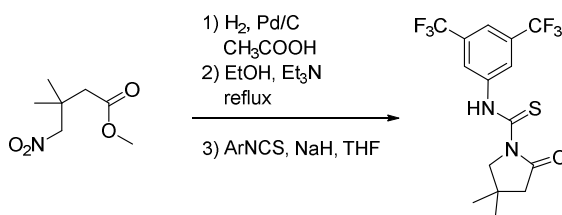

**Scheme SI-5.** Synthesis of **Ic**

Pd/C (53.2 mg, 10wt%) was added to a solution of methyl 3,3-dimethyl-4-nitrobutanoate<sup>19</sup> (1.86 g, 10.6 mmol) in acetic acid (26.5 mL) and the mixture was stirred under a hydrogen atmosphere at room temperature for 12 hours. After that, the mixture was filtered through celite and the solvent was evaporated. Then, the crude product was dissolved in EtOH (20 mL) and Et<sub>3</sub>N was added to maintain basic pH. The solution was stirred at reflux overnight. Then, solvent was evaporated and the crude mixture was dissolved in Et<sub>2</sub>O and 1M HCl was added. Aqueous phase was extracted with Et<sub>2</sub>O (2 × 20 mL), organic phases were

<sup>19</sup> Bunce, R. A.; Drumright, R. E. *The New Journal for Organic Synthesis*, **1987**, *19*, 471.

collected, dried over anhydrous  $\text{Na}_2\text{SO}_4$ , filtered and concentrated *in vacuo*. Then, to a stirred solution of the crude product in THF (48 mL) at 0 °C, NaH (0.64 g, 60%, 15.9 mmol) was added portionwise. After stirring at 0 °C for 30 min, 3,5-bis(trifluoromethyl)phenyl isothiocyanate (3.0 mL, 15.9 mmol) was slowly added at -78 °C and the reaction was stirred and allowed to warm to room temperature overnight. Then a solution of saturated  $\text{NH}_4\text{Cl}$  was added to quench the reaction, and the mixture was extracted with EtOAc, and the organic layer was dried over  $\text{Na}_2\text{SO}_4$  and concentrated *in vacuo*. The crude product was then purified by column chromatography on silica gel (Hexanes/EtOAc) to afford 2.7 g of **1c** (7.0 mmol, 66%) as a white solid.  $R_f$ : 0.88 (hexanes/EtOAc 8:2).  $^1\text{H}$  NMR (300 MHz,  $\text{CDCl}_3$ ):  $\delta$  12.79 (s, 1H, NH), 8.18 (s, 2H,  $\text{C}_{\text{Ar}}\text{-H}$ ), 7.72 (s, 1H,  $\text{C}_{\text{Ar}}\text{-H}$ ), 4.01 (s, 2H,  $\text{C}_5\text{-H}$ ), 2.62 (s, 2H,  $\text{C}_3\text{-H}$ ), 1.23 (s, 6H,  $2 \times \text{CH}_3$ ).  $^{13}\text{C}$  NMR (75 MHz,  $\text{CDCl}_3$ ):  $\delta$  179.7 (CS), 176.7 ( $\text{C}_2$ ), 139.8 ( $\text{C}_{\text{Ar}}\text{-C}$ ), 132.2 (q,  $^2J_{\text{C-F}} = 33.7$  Hz,  $2 \times \text{CCF}_3$ ), 123.2 (q,  $^1J_{\text{C-F}} = 272.8$  Hz,  $2 \times \text{CF}_3$ ), 124.5 ( $\text{C}_{\text{Ar}}\text{-H}$ ), 124.4 ( $\text{C}_{\text{Ar}}\text{-H}$ ), 119.8 (q,  $^3J_{\text{C-F}} = 3.8$  Hz,  $\text{C}_{\text{Ar}}\text{-H}$ ), 63.6 ( $\text{C}_5$ ), 49.1 ( $\text{C}_3$ ), 31.2 ( $\text{C}_4$ ), 27.2 ( $2 \times \text{CH}_3$ ).  $^{19}\text{F}$  NMR (282 MHz,  $\text{CDCl}_3$ ):  $\delta$  -63.0 ( $2 \times \text{CF}_3$ ). IR (ATR)  $\text{cm}^{-1}$ : 2960 (NH), 1709 (C=O), 1276 (C=S), 1127 (C-N). MS (EI)  $m/z$  (%): 271 (100), 252 (24), 213 (25), 202 (13), 163 (15), 143 (8), 113 (10), 69 (10). HRMS: Calculated for  $[\text{C}_{15}\text{H}_{15}\text{N}_2\text{OSF}_6]^+$ : 385.0809 [(M+H) $^+$ ]; found: 385.0808. M.p. ( $\text{CH}_2\text{Cl}_2$ ): 93-95 °C.

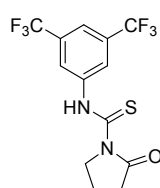

***N*-[3,5-bis(trifluoromethyl)phenyl]-2-oxopyrrolidine-1-carbothioamide (**1c**)**. Following *GP-C*, **1c** (2.15 g, 6.0 mmol) was isolated by FC (petroleum ether/EtOAc gradient from 19:1 to 8:2) in 98% yield as colorless crystals starting from pyrrolidin-2-one (0.47 mL, 6.15 mmol) and 3,5-bis(trifluoromethyl)phenyl isothiocyanate (1.68 mL, 9.2 mmol) and NaH (0.37 g, 9.2 mmol) in tetrahydrofuran (28 mL).  $R_f$ : 0.53 (hexanes/EtOAc 7:3).  $^1\text{H}$  NMR (300 MHz,  $\text{CDCl}_3$ ):  $\delta$  12.86 (bs, 1H, NH), 8.18 (s, 2H,  $\text{C}_{\text{Ar}}\text{-H}$ ), 7.72 (s, 1H,  $\text{C}_{\text{Ar}}\text{-H}$ ), 4.35-4.20 (m, 2H,  $\text{C}_5$ ), 2.83 (t,  $J = 8.1$  Hz, 2H,  $\text{C}_3\text{-H}$ ), 2.18-2.04 (m, 2H,  $\text{C}_4\text{-H}$ ).  $^{13}\text{C}$  NMR (75 MHz,  $\text{CDCl}_3$ ):  $\delta$  179.5 (CS), 177.3 ( $\text{C}_2$ ), 139.7 ( $\text{C}_{\text{Ar}}\text{-C}$ ), 132.2 (q,  $^2J_{\text{C-F}} = 33.7$  Hz,  $\text{CCF}_3$ ), 124.4 (q,  $^3J_{\text{C-F}} = 3.8$  Hz,  $\text{C}_{\text{Ar}}\text{-H}$ ), 123.1 (q,  $^1J_{\text{C-F}} = 272.8$  Hz,  $\text{CF}_3$ ), 119.8 (q,  $^3J_{\text{C-F}} = 3.9$  Hz,  $\text{C}_{\text{Ar}}\text{-H}$ ), 51.4 ( $\text{C}_5$ ), 34.7 ( $\text{C}_3$ ), 16.6 ( $\text{C}_4$ ).  $^{19}\text{F}$  NMR (282 MHz,  $\text{CDCl}_3$ ):  $\delta$  -63.0 ( $\text{CF}_3$ ). IR (ATR)  $\text{cm}^{-1}$ : 2992 (NH), 1704 (C=O), 1276 (C=S), 1120 (C-N). MS (EI)  $m/z$  (%): 271 (100), 252 (24), 213 (25), 202 (13), 163 (15), 144 (8), 85 (13), 69 (9). HRMS: Calculated for  $[\text{C}_{13}\text{H}_{11}\text{N}_2\text{OSF}_6]^+$ : 357.0496 [(M+H) $^+$ ]; found: 357.0500. M.p. ( $\text{CH}_2\text{Cl}_2$ ): 101-103 °C.

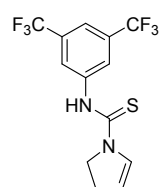

***N*-[3,5-bis(trifluoromethyl)phenyl]-2,3-dihydro-1H-pyrrole-1-carbothioamide (**2e**)**. Following *GP-E*, **2e** (862 mg, 2.53 mmol) was isolated by FC (petroleum ether/EtOAc gradient from 19:1 to 8:2) in 76% yield as a white solid starting from *N*-(3,5-bis(trifluoromethyl)phenyl)-2-oxopyrrolidine-1-carbothioamide **1c** (1.19 g, 3.3 mmol) and  $\text{LiEt}_3\text{BH}$  (7.0 mL, 7.0 mmol) in tetrahydrofuran (7 mL), and then, using DMAP (8.2 mg, 0.067 mmol), TFAA (0.57 mL, 4.0 mmol) and  $\text{Et}_3\text{N}$  (2.57 mL, 18.4 mmol) in tetrahydrofuran/toluene mixture (4 mL/8 mL).  $R_f$ : 0.46 (hexanes/EtOAc 7:3).  $^1\text{H}$  NMR (300 MHz,  $\text{CDCl}_3$ ):  $\delta$  7.89 (s, 2H,  $\text{C}_{\text{Ar}}\text{-H}$ ), 7.64 (s, 1H,  $\text{C}_{\text{Ar}}\text{-H}$ ), 7.13 (s, 1H,  $\text{C}_2\text{-H}$ ), 5.53 (s, 1H,  $\text{C}_3\text{-H}$ ), 4.14-3.99 (m, 2H,  $\text{C}_5\text{-H}$ ), 2.93-2.78 (m, 2H,  $\text{C}_4\text{-H}$ ).  $^{13}\text{C}$  NMR (75 MHz,  $\text{CDCl}_3$ ):  $\delta$  174.5 (CS), 140.5 ( $\text{C}_{\text{Ar}}\text{-C}$ ), 131.2 ( $\text{C}_2$ ), 131.9 (q,  $^2J_{\text{C-F}} = 33.6$  Hz,  $\text{CCF}_3$ ), 124.4 ( $\text{C}_{\text{Ar}}\text{-H}$ ), 123.2 (q,  $^1J_{\text{C-F}} = 272.8$  Hz,  $\text{CF}_3$ ), 118.7 ( $\text{C}_{\text{Ar}}\text{-H}$ ), 115.2 ( $\text{C}_3$ ), 53.6 ( $\text{C}_5$ ), 29.8 ( $\text{C}_4$ ).  $^{19}\text{F}$  NMR (282 MHz,  $\text{CDCl}_3$ ):  $\delta$  -63.0 ( $\text{CF}_3$ ). IR (ATR)  $\text{cm}^{-1}$ : 3197 (NH), 2910 (C-H), 1537 (C=C), 1277 (C=S), 1125 (C-N). MS (EI)  $m/z$  (%): 271 (100), 252 (26), 213 (24), 202 (12), 163 (16), 143 (9), 83 (34), 69 (10). HRMS: Calculated for  $[\text{C}_{13}\text{H}_{11}\text{N}_2\text{SF}_6]^+$ : 341.0547 [(M+H) $^+$ ]; found: 341.0554. M.p. ( $\text{CH}_2\text{Cl}_2$ ): 142-144 °C.

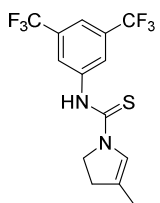

***N*-[3,5-bis(trifluoromethyl)phenyl]-4-methyl-2,3-dihydro-1H-pyrrole-1-carbothioamide (**5a**)**. Following *GP-E*, **5a** (868 mg, 2.45 mmol) was isolated by FC (petroleum ether/EtOAc gradient from 19:1 to 8:2) in 57% yield as a white solid starting from *N*-(3,5-bis(trifluoromethyl)phenyl)-3-methyl-2-oxopyrrolidine-1-carbothioamide **11a** (1.6 g, 4.3 mmol) and  $\text{LiEt}_3\text{BH}$  (9.0 mL, 9.0 mmol) in tetrahydrofuran (10 mL), and then, using DMAP (10.5 mg, 0.086 mmol), TFAA (0.73 mL, 5.17 mmol) and  $\text{Et}_3\text{N}$  (3.3 mL, 23.7 mmol) in tetrahydrofuran/toluene mixture (5.5 mL/11 mL).  $R_f$ : 0.69 (hexanes/EtOAc 7:3).  $^1\text{H}$  NMR (500 MHz,  $\text{DMSO-}d_6$ , 100 °C):  $\delta$  9.36 (bs, 1H, NH), 8.24 (s, 2H,  $\text{C}_{\text{Ar}}\text{-H}$ ), 7.65 (s, 1H,  $\text{C}_{\text{Ar}}\text{-H}$ ), 7.08 (s, 1H,  $\text{C}_2\text{-H}$ ), 4.23-4.05 (m, 2H,  $\text{C}_5\text{-H}$ ), 2.73-2.65 (m, 2H,  $\text{C}_4\text{-H}$ ), 1.82 (s, 3H,  $\text{CH}_3$ ).  $^{13}\text{C}$  NMR (125 MHz,  $\text{DMSO-}d_6$ , 100 °C):  $\delta$  172.3 (CS), 142.3 ( $\text{C}_{\text{Ar}}\text{-C}$ ), 129.4 (q,  $^2J_{\text{C-F}} = 32.9$  Hz,  $\text{CCF}_3$ ), 125.2 ( $\text{C}_2$ ), 123.2 ( $\text{C}_{\text{Ar}}\text{-H}$ ), 122.9 (q,  $^1J_{\text{C-F}} = 272.8$  Hz,  $\text{CF}_3$ ), 115.6 (q,  $^3J_{\text{C-F}} = 4.1$  Hz,  $\text{C}_{\text{Ar}}\text{-H}$ ), 49.7 ( $\text{C}_5$ ), 32.7 ( $\text{C}_3$ ), 13.0 ( $\text{CH}_3$ ).  $^{19}\text{F}$  NMR (282 MHz,  $\text{DMSO-}d_6$ ):  $\delta$  -61.5 ( $\text{CF}_3$ ). IR (ATR)  $\text{cm}^{-1}$ : 2930 (NH), 2820 (C-H), 1540 (C=C), 1274 (C=S), 1123 (C-

N). MS (EI)  $m/z$  (%): 271 (100), 252 (22), 213 (22), 202 (10), 163 (12), 143 (7), 83 (31), 69 (6). HRMS: Calculated for  $[C_{14}H_{13}N_2SF_6]^+$ : 355.0704  $[(M+H)^+]$ ; found: 355.0712. M.p. ( $CH_2Cl_2$ ): 144-146 °C.

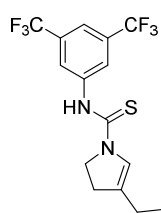

***N*-[3,5-bis(trifluoromethyl)phenyl]-4-ethyl-2,3-dihydro-1*H*-pyrrole-1-carbothioamide (5b).** Following *GP-E*, **5b** (244 mg, 0.66 mmol) was isolated by FC (petroleum ether/EtOAc gradient from 19:1 to 8:2) in 51% yield as a white solid starting from *N*-(3,5-bis(trifluoromethyl)phenyl)-3-ethyl-2-oxopyrrolidine-1-carbothioamide **IIb** (500 mg, 1.3 mmol) and  $LiEt_3BH$  (2.7 mL, 2.7 mmol) in tetrahydrofuran (3.0 mL), and then, using DMAP (3.2 mg, 0.026 mmol), TFAA (0.219 mL, 1.55 mmol) and  $Et_3N$  (0.99 mL, 7.12 mmol) in tetrahydrofuran/toluene mixture (1.7 mL/3.4 mL).  $R_f$ : 0.58 (hexanes/EtOAc 8:2).  $^1H$  NMR (500 MHz,  $DMSO-d_6$ , 100 °C):  $\delta$  9.38 (bs, 1H, NH), 8.24 (s, 2H,  $C_{Ar}$ -H), 7.65 (s, 1H,  $C_{Ar}$ -H), 7.08 (s, 1H,  $C_2$ -H), 4.16-4.09 (m, 2H,  $C_5$ -H), 2.75-2.64 (m, 2H,  $C_4$ -H), 2.19 (q,  $J = 7.4$  Hz, 2H,  $CH_2CH_3$ ), 1.10 (t,  $J = 7.4$  Hz, 3H,  $CH_2CH_3$ ).  $^{13}C$  NMR (125 MHz,  $DMSO-d_6$ , 100 °C):  $\delta$  172.4 (CS), 142.3 ( $C_{Ar}$ -C), 131.4 ( $C_3$ ), 129.5 (q,  $^2J_{C-F} = 32.8$  Hz,  $CCF_3$ ), 124.4 ( $C_2$ ), 123.2 ( $C_{Ar}$ -H), 122.9 (q,  $^1J_{C-F} = 272.6$  Hz,  $CF_3$ ), 115.6 ( $C_{Ar}$ -H), 49.6 ( $C_5$ ), 30.8 ( $C_4$ ), 20.9 ( $CH_2CH_3$ ), 11.5 ( $CH_2CH_3$ ).  $^{19}F$  NMR (282 MHz,  $DMSO-d_6$ ):  $\delta$  -61.6 ( $CF_3$ ). IR (ATR)  $cm^{-1}$ : 2971 (NH), 1537 (C=C), 1274 (C=S), 1126 (C-H). MS (EI)  $m/z$  (%): 271 (100), 252 (25), 213 (26), 202 (10), 163 (11), 83 (10), 69 (12). HRMS: Calculated for  $[C_{15}H_{15}N_2SF_6]^+$ : 369.0860  $[(M+H)^+]$ ; found: 369.0863. M.p. ( $CH_2Cl_2$ ): 133-135 °C.

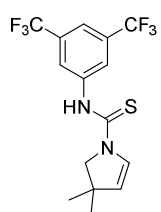

***N*-[3,5-bis(trifluoromethyl)phenyl]-3,3-dimethyl-2,3-dihydro-1*H*-pyrrole-1-carbothioamide (5c).** Following *GP-E*, **5c** (465 mg, 1.26 mmol) was isolated by FC (petroleum ether/EtOAc gradient from 19:1 to 8:2) in 92% yield as a white solid starting from *N*-(3,5-bis(trifluoromethyl)phenyl)-4,4-dimethyl-2-oxopyrrolidine-1-carbothioamide **Ic** (530 mg, 1.372 mmol) and  $LiEt_3BH$  (2.88 mL, 2.88 mmol) in tetrahydrofuran (3 mL), and then, using DMAP (3.4 mg, 0.0274 mmol), TFAA (0.23 mL, 1.65 mmol) and  $Et_3N$  (1.05 mL, 7.55 mmol) in tetrahydrofuran/toluene mixture (1.5 mL/3.5 mL).  $R_f$ : 0.80 (hexanes/EtOAc 8:2).  $^1H$  NMR (500 MHz,  $DMSO-d_6$ ):  $\delta$  9.53 (s, 1H, NH), 8.26 (s, 2H,  $C_{Ar}$ -H), 7.69 (s, 1H,  $C_{Ar}$ -H), 7.21 (d,  $J = 4.2$  Hz, 1H,  $C_2$ -H), 5.46 (d,  $J = 4.6$  Hz, 1H,  $C_3$ -H), 3.86 (s, 2H,  $C_5$ -H), 1.21 (s, 6H,  $2 \times CH_3$ ).  $^{13}C$  NMR (125 MHz,  $DMSO-d_6$ ):  $\delta$  174.2 (CS), 142.0 ( $C_{Ar}$ -C), 129.5 (q,  $^2J_{C-F} = 32.9$  Hz,  $CCF_3$ ), 128.4 ( $C_2$ ), 124.1 ( $C_3$ ), 123.6 ( $C_{Ar}$ -H), 122.8 (q,  $^1J_{C-F} = 273.0$  Hz,  $CF_3$ ), 116.0 ( $C_{Ar}$ -H), 62.9 ( $C_5$ ), 42.0 ( $C_4$ ), 27.5 ( $C(CH_3)_2$ ).  $^{19}F$  NMR (282 MHz,  $DMSO-d_6$ ):  $\delta$  -63.0 ( $CF_3$ ). IR (ATR)  $cm^{-1}$ : 2960 (NH), 2931 (C-H), 1534 (C=C), 1274 (C=S), 1125 (C-N). MS (EI)  $m/z$  (%): 271 (100), 252 (23), 213 (23), 202 (12), 163 (14), 143 (7), 83 (35), 69 (8). HRMS: Calculated for  $[C_{15}H_{15}N_2SF_6]^+$ : 369.0860  $[(M+H)^+]$ ; found: 369.0866. M.p. ( $CH_2Cl_2$ ): 123-125 °C.

### 3.3. Preparation of catalysts 3

Catalyst **3a**, **3b**, **3c** and **3d** are commercially available. Catalysts **3e**<sup>20</sup> and **3f**<sup>21</sup> have been previously synthesized and used in the literature.

<sup>20</sup> D. Nakashima, H. Yamamoto, *J. Am. Chem. Soc.* **2006**, *128*, 9626.

<sup>21</sup> M. Rueping, B. J. Nachtsheim, R. M. Koenigs, W. Ieawsuwan, *Chem. Eur. J.* **2010**, *16*, 13116.

### 3.4. Preparation of hydrazone pyrrolidines **4a-z** and **6a-c** (Table 1, 2 and Scheme 2)

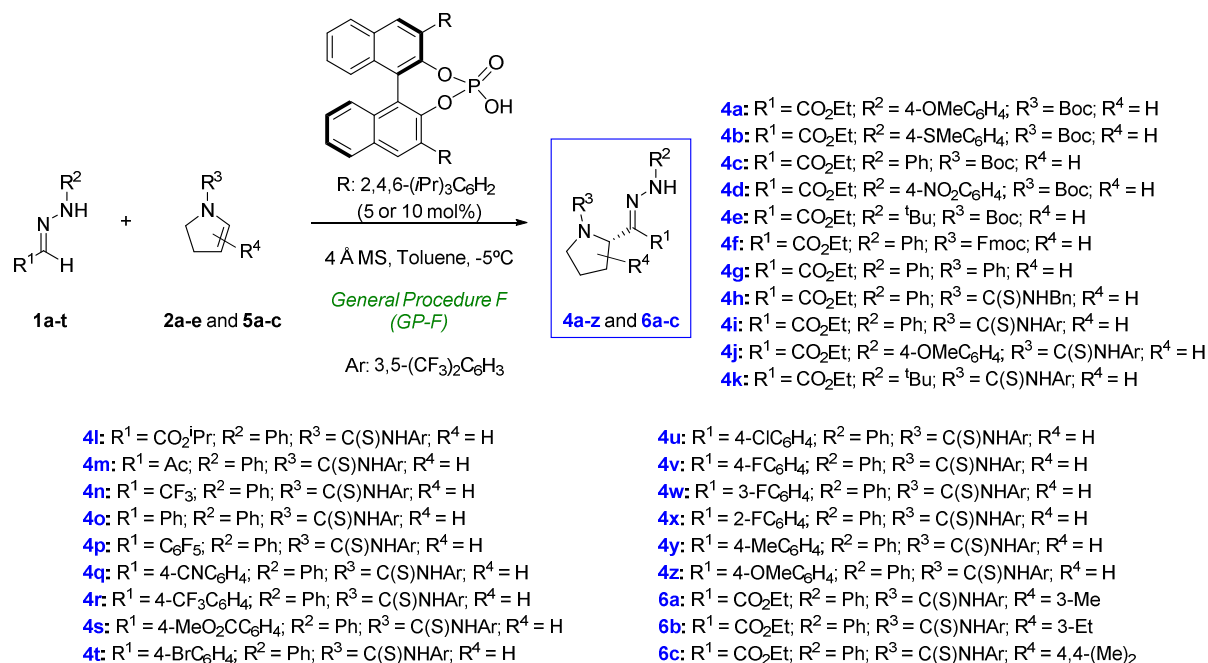

**Scheme SI-6.** 1,2-Addition reaction of hydrazones to enamides

**General procedure F (GP-F).** An ordinary vial equipped with a magnetic stirring bar was charged with catalyst (**R**)-TRIP (0.009 mmol, 0.01 eq.), dry toluene (0.18 mL) and smashed molecular sieves (4Å, 27 mg). The reaction was cooled to -5 °C and the corresponding encarbamate/enethiourea (0.135 mmol, 1.5 eq.) and the corresponding hydrazone (0.09 mmol, 1.0 eq.) were added. The reaction mixture was stirred at -5 °C until completion of reaction. The crude reaction mixture was directly charged onto silica gel and subjected to flash chromatography, affording the corresponding adducts **4a-z** and **6a-c**.

The <sup>1</sup>H NMR and <sup>13</sup>C NMR spectra of products **4h-z** and **6a-c** were performed in DMSO-*d*<sub>6</sub> and at 100 °C to get rid of rotamers and simplified the spectra. It should be pointed out that <sup>13</sup>C NMR for these compounds were assigned by 2D NMR experiments (HSQC, HMBC), due to the low signal intensities in the <sup>13</sup>C NMR spectra.

**(S)-N-Boc-(Z)-2-{2-ethoxy-1-[2-(4-(methoxyphenyl))hydrazono]-2-oxoethyl}pyrrolidine (**4a**).** Following GP-F with slight modification, **4a** (30.8 mg, 0.079 mmol) was isolated by FC (hexanes/EtOAc gradient from 19:1 to 7:3) after 24h in 60% yield as a yellow oil starting from ethyl (*E*)-2-(2-(4-(methoxy)phenyl)hydrazono)acetate **1a** (34.4 mg, 0.156 mmol) and *N*-Boc-2,3-dihydro-1*H*-pyrrole **2a** (23.2 mg, 0.13 mmol) in the presence of catalyst (*R*)-TRIP (9.8 mg, 0.013 mmol), MS (4Å, 38 mg) and using dry toluene (0.26 mL) as solvent. R<sub>f</sub>: 0.72 (hexanes/EtOAc 7:3). <sup>1</sup>H NMR (300 MHz, CDCl<sub>3</sub>): (1.45:1 rotamer ratio, \*denotes minor rotamer resonances, #denotes overlapped signals) δ 12.01# (bs, 1H, NH), 11.98\*# (bs, 1H, NH), 7.08 (d, *J* = 8.5 Hz, 2H, C<sub>Ar</sub>-H), 6.84 (d, *J* = 8.5 Hz, 2H, C<sub>Ar</sub>-H), 5.03-4.90\* (m, 1H, C<sub>2</sub>-H), 4.81 (dd, *J* = 7.8, 3.2 Hz, 1H, C<sub>2</sub>-H), 4.27 (q, *J* = 7.2 Hz, 2H, CH<sub>2</sub>CH<sub>3</sub>), 3.77 (s, 3H, OCH<sub>3</sub>), 3.68-3.33 (m, 2H, C<sub>5</sub>-H), 2.30-1.68 (m, 4H, C<sub>3</sub>-H + C<sub>4</sub>-H), 1.58-1.23 (m, 12H, CH<sub>2</sub>CH<sub>3</sub> + C(CH<sub>3</sub>)<sub>3</sub>). <sup>13</sup>C NMR (75 MHz, CDCl<sub>3</sub>): δ 163.1 (COO), 155.2 (C<sub>Ar</sub>-C), 154.4 (NCOO), 137.4 (CN), 127.7 (C<sub>Ar</sub>-C), 114.8 (C<sub>Ar</sub>-H), 114.8 (C<sub>Ar</sub>-H), 79.1 (C(CH<sub>3</sub>)<sub>3</sub>), 60.6 (CH<sub>2</sub>CH<sub>3</sub>), 58.0 (C<sub>2</sub>), 55.7 (OCH<sub>3</sub>), 46.6 (C<sub>5</sub>), 32.5 (C<sub>3</sub>), 28.6 (C(CH<sub>3</sub>)<sub>3</sub>), 22.8 (C<sub>4</sub>), 14.4 (CH<sub>2</sub>CH<sub>3</sub>). IR (ATR) cm<sup>-1</sup>: 2977 (NH), 2930 (C-H), 1691 (C=O), 1548 (C=N). MS (EI) *m/z* (%): 281 (16), 207 (57), 149 (100), 134 (62), 108 (50), 93 (14), 78 (52), 52 (40). HRMS: Calculated for [C<sub>20</sub>H<sub>30</sub>N<sub>3</sub>O<sub>5</sub>]<sup>+</sup>: 392.2185 [(M+H)<sup>+</sup>]; found: 392.2188. The ee was determined by HPLC using a Chiralcel OD-3 column [*n*-hexane/*i*PrOH (95:05)]; flow rate 1.00 mL/min; τ<sub>major</sub> = 5.295 min, τ<sub>minor</sub> = 6.207 min (86% ee). [α]<sub>D</sub><sup>20</sup>: -88.5 (*c* = 1.0, CH<sub>2</sub>Cl<sub>2</sub>).

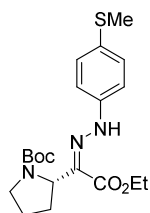

**(S)-N-Boc-(Z)-2-[2-ethoxy-1-[2-(4-(methylthio)phenyl)hydrazono]-2-oxoethyl]pyrrolidine (4b).**

Following *GP-F* with slight modification, **4b** (28.1 mg, 0.069 mmol) was isolated by FC (hexanes/EtOAc gradient from 19:1 to 7:3) after 24h in 53% yield as a yellow oil starting from ethyl (*E*)-2-(2-(4-(methylthio)phenyl)hydrazono)acetate **1b** (37.2 mg, 0.156 mmol) and *N*-Boc-2,3-dihydro-1*H*-pyrrole **2a** (23.2 mg, 0.13 mmol) in the presence of catalyst (*R*)-TRIP (9.8 mg, 0.013 mmol), MS (4Å, 38 mg) and using dry toluene (0.26 mL) as solvent.  $R_f$ : 0.52 (hexanes/EtOAc 8:2).  $^1\text{H NMR}$  (300 MHz,  $\text{CDCl}_3$ ): (1.25:1 rotamer ratio, \*denotes minor rotamer resonances)  $\delta$  12.02 (bs, 1H, NH), 7.24 (d,  $J = 8.5$  Hz, 2H,  $\text{C}_{\text{Ar-H}}$ ), 7.09 (d,  $J = 8.5$  Hz, 2H,  $\text{C}_{\text{Ar-H}}$ ), 5.01-4.92\* (m, 1H,  $\text{C}_2\text{-H}$ ), 4.86-4.77 (m, 1H,  $\text{C}_2\text{-H}$ ), 4.29 (q,  $J = 7.1$  Hz, 2H,  $\text{CH}_2\text{CH}_3$ ), 3.68-3.35 (m, 2H,  $\text{C}_5\text{-H}$ ), 2.45 (s, 3H,  $\text{SCH}_3$ ), 2.25-2.07 (m, 1H,  $\text{C}_3\text{-H}_a$ ), 2.02-1.77 (m, 3H,  $\text{C}_3\text{-H}_b + \text{C}_4\text{-H}$ ), 1.52-1.27 (m, 12H,  $\text{CH}_2\text{CH}_3 + \text{C}(\text{CH}_3)_3$ ).  $^{13}\text{C NMR}$  (75 MHz,  $\text{CDCl}_3$ ):  $\delta$  163.0 (COO), 163.0\* (COO), 154.3 (NCO), 142.1\* ( $\text{C}_{\text{Ar-C}}$ ), 141.6 ( $\text{C}_{\text{Ar-C}}$ ), 130.5\* ( $\text{C}_{\text{Ar-C}}$ ), 129.7\* ( $\text{C}_{\text{Ar-H}}$ ), 129.6 ( $\text{C}_{\text{Ar-H}}$ ), 129.0 ( $\text{C}_{\text{Ar-C}}$ ), 127.9 (CN), 114.4 ( $\text{C}_{\text{Ar-H}}$ ), 114.4\* ( $\text{C}_{\text{Ar-H}}$ ), 79.2\* ( $\text{C}(\text{CH}_3)_3$ ), 79.1 ( $\text{C}(\text{CH}_3)_3$ ), 60.8 ( $\text{CH}_2\text{CH}_3$ ), 58.1 ( $\text{C}_2$ ), 57.7\* ( $\text{C}_2$ ), 47.0\* ( $\text{C}_5$ ), 46.6 ( $\text{C}_5$ ), 32.4 ( $\text{C}_3$ ), 31.3\* ( $\text{C}_3$ ), 28.8\* ( $\text{C}(\text{CH}_3)_3$ ), 28.5 ( $\text{C}(\text{CH}_3)_3$ ), 22.9\* ( $\text{C}_4$ ), 22.8 ( $\text{C}_4$ ), 17.9\* ( $\text{SCH}_3$ ), 17.7 ( $\text{SCH}_3$ ), 14.4 ( $\text{CH}_2\text{CH}_3$ ), 14.3\* ( $\text{CH}_2\text{CH}_3$ ). IR (ATR)  $\text{cm}^{-1}$ : 2976 (NH), 2820 (C-H), 1693 (C=O), 1551 (C=N). MS (EI)  $m/z$  (%): 281 (20), 238 (16), 207 (89), 191 (11), 165 (100), 150 (61), 138 (37), 124 (53), 106 (27), 78 (29), 69 (33), 56 (28). HRMS: Calculated for  $[\text{C}_{20}\text{H}_{30}\text{N}_3\text{O}_4\text{S}]^+$ : 408.1957 [(M+H) $^+$ ]; found: 408.1938; The ee was determined by HPLC using a Chiralcel OD-3 column [*n*-hexane/*i*PrOH (95:05)]; flow rate 1.00 mL/min;  $\tau_{\text{major}} = 5.036$  min,  $\tau_{\text{minor}} = 5.915$  min (92% ee).  $[\alpha]_{\text{D}}^{20}$ : -158.7 ( $c = 1.0$ ,  $\text{CH}_2\text{Cl}_2$ ).

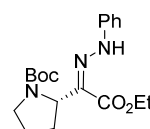

**(S)-N-Boc-(Z)-2-[2-ethoxy-1-(2-(phenyl)hydrazono)-2-oxoethyl]pyrrolidine (4c).**

Following *GP-F* with slight modification, **4c** (45.1 mg, 0.125 mmol) was isolated by FC (hexanes/EtOAc gradient from 19:1 to 7:3) after 24h in 96% yield as an orange oil starting from ethyl (*E*)-2-(2-phenylhydrazono)acetate **1c** (25.0 mg, 0.13 mmol) and *N*-Boc-2,3-dihydro-1*H*-pyrrole **2a** (6 × 5.9  $\mu\text{L}$  every 1h 30 min, 0.195 mmol) added in portions in the presence of catalyst (*R*)-TRIP (9.8 mg, 0.013 mmol), MS (4Å, 38 mg) and using dry toluene (0.26 mL) as solvent.  $R_f$ : 0.79 (hexanes/EtOAc 8:2).  $^1\text{H NMR}$  (300 MHz,  $\text{CDCl}_3$ ): (1.5:1 rotamer ratio, \*denotes minor rotamer resonances, #overlapped signals)  $\delta$  12.02 (s, 1H, NH), 11.99\* (s, 1H, NH), 7.43-7.22 (m, 2H,  $\text{C}_{\text{Ar-H}}$ ), 7.22-7.07 (m, 2H,  $\text{C}_{\text{Ar-H}}$ ), 7.05-6.83 (m, 1H,  $\text{C}_{\text{Ar-H}}$ ), 5.02-4.94\* (m, 1H,  $\text{C}_2\text{-H}$ ), 4.82 (dd,  $J = 7.5, 3.3$  Hz, 1H,  $\text{C}_2\text{-H}$ ), 4.29 (q,  $J = 6.9$  Hz, 2H,  $\text{CH}_2\text{CH}_3$ ), 3.72-3.30 (m, 2H,  $\text{C}_5\text{-H}$ ), 2.30-1.73 (m, 4H,  $\text{C}_3\text{-H} + \text{C}_4\text{-H}$ ), 1.45\* (s, 9H,  $\text{C}(\text{CH}_3)_3$ ), 1.40-1.19# (m, 12H,  $\text{CH}_2\text{CH}_3 + \text{C}(\text{CH}_3)_3$ ).  $^{13}\text{C NMR}$  (75 MHz,  $\text{CDCl}_3$ ):  $\delta$  163.0 (COO), 154.3 (NCO), 143.7\* (CN), 143.4 (CN), 129.4 ( $\text{C}_{\text{Ar-H}}$ ), 129.2\* ( $\text{C}_{\text{Ar-H}}$ ), 128.8 ( $\text{C}_{\text{Ar-C}}$ ), 127.6\* ( $\text{C}_{\text{Ar-C}}$ ), 122.1 ( $\text{C}_{\text{Ar-H}}$ ), 121.9\* ( $\text{C}_{\text{Ar-H}}$ ), 113.8 ( $\text{C}_{\text{Ar-H}}$ ), 79.2\* ( $\text{C}(\text{CH}_3)_3$ ), 79.1 ( $\text{C}(\text{CH}_3)_3$ ), 60.8 ( $\text{CH}_2\text{CH}_3$ ), 58.1 ( $\text{C}_2$ ), 57.6\* ( $\text{C}_2$ ), 46.6 ( $\text{C}_5$ ), 32.4 ( $\text{C}_3$ ), 31.3\* ( $\text{C}_3$ ), 28.7\* ( $\text{C}(\text{CH}_3)_3$ ), 28.4 ( $\text{C}(\text{CH}_3)_3$ ), 22.9\* ( $\text{C}_4$ ), 22.7 ( $\text{C}_4$ ), 14.3 ( $\text{CH}_2\text{CH}_3$ ), 14.3\* ( $\text{CH}_2\text{CH}_3$ ). IR (ATR)  $\text{cm}^{-1}$ : 2976 (NH), 2920 (C-H), 1694 (C=O), 1550 (C=N). MS (EI)  $m/z$  (%): 281 (16), 207 (57), 149 (100), 134 (62), 108 (50), 93 (14), 78 (52), 52 (40). HRMS: Calculated for  $[\text{C}_{19}\text{H}_{28}\text{N}_3\text{O}_4]^+$ : 362.2080 [(M-H) $^+$ ]; found: 362.2081. The ee was determined by HPLC using a Chiralcel OD-3 column [*n*-hexane/*i*PrOH (90:10)]; flow rate 1.00 mL/min;  $\tau_{\text{major}} = 4.754$  min,  $\tau_{\text{minor}} = 3.825$  min (93% ee).  $[\alpha]_{\text{D}}^{20}$ : -177.8 ( $c = 1.0$ ,  $\text{CH}_2\text{Cl}_2$ ).

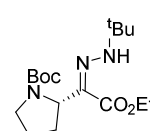

**(S)-tert-Butyl-(Z)-2-[1-(2-(tert-butyl)hydrazono)-2-ethoxy-2-oxoethyl]pyrrolidine-1-carboxylate (4e).**

Following *GP-F* with slight modification, **4e** (38.6 mg, 0.113 mmol) was isolated by FC (hexanes/EtOAc gradient from 19:1 to 7:3) after 5h in 87% yield as a light yellow oil starting from ethyl (*E*)-2-(2-(tert-butyl)hydrazono)acetate **1e** (26.9 mg, 0.156 mmol) and *N*-Boc-2,3-dihydro-1*H*-pyrrole **2a** (23.6  $\mu\text{L}$ , 0.13 mmol) in the presence of catalyst (*R*)-TRIP (9.8 mg, 0.013 mmol), MS (4Å, 38 mg) and using dry toluene (0.26 mL) as solvent.  $R_f$ : 0.70 (hexanes/EtOAc 7:3).  $^1\text{H NMR}$  (300 MHz,  $\text{CDCl}_3$ ): (1.3:1 rotamer ratio, \*denotes minor rotamer resonances)  $\delta$  9.99 (s, 1H, NH), 9.92\* (s, 1H, NH), 4.88\* (d,  $J = 7.1$  Hz, 1H,  $\text{C}_2\text{-H}$ ), 4.75 (dd,  $J = 7.5, 2.9$  Hz, 1H,  $\text{C}_2\text{-H}$ ), 4.19 (q,  $J = 7.2$  Hz, 2H,  $\text{CH}_2\text{CH}_3$ ), 3.58-3.22 (m, 2H,  $\text{C}_5\text{-H}$ ), 2.16-1.73 (m, 4H,  $\text{C}_3\text{-H} + \text{C}_4\text{-H}$ ), 1.43\* (s, 9H,  $\text{OC}(\text{CH}_3)_3$ ), 1.33 (s, 9H,  $\text{OC}(\text{CH}_3)_3$ ), 1.31-1.24 (m, 3H,  $\text{CH}_2\text{CH}_3$ ), 1.20 (s, 9H,  $\text{C}(\text{CH}_3)_3$ ).  $^{13}\text{C NMR}$  (75 MHz,  $\text{CDCl}_3$ ):  $\delta$  162.9 (COO), 162.8\* (COO), 154.3 (NCO), 154.1\* (NCO), 125.4 (CN), 124.0\* (CN), 78.6 ( $\text{OC}(\text{CH}_3)_3$ ), 59.9\* ( $\text{CH}_2\text{CH}_3$ ), 59.8 ( $\text{CH}_2\text{CH}_3$ ), 57.5 ( $\text{C}_2$ ), 57.2\* ( $\text{C}_2$ ), 54.5 ( $\text{C}(\text{CH}_3)_3$ ), 54.4\* ( $\text{C}(\text{CH}_3)_3$ ), 46.5 ( $\text{C}_5$ ), 32.7 ( $\text{C}_3$ ), 31.5\* ( $\text{C}_3$ ), 28.9 ( $\text{OC}(\text{CH}_3)_3$ ), 28.8\* ( $\text{OC}(\text{CH}_3)_3$ ), 28.7\* ( $\text{C}(\text{CH}_3)_3$ ), 28.6 ( $\text{C}(\text{CH}_3)_3$ ), 22.8\* ( $\text{C}_4$ ), 22.6 ( $\text{C}_4$ ), 14.5 ( $\text{CH}_2\text{CH}_3$ ), 14.4\* ( $\text{CH}_2\text{CH}_3$ ). IR (ATR)  $\text{cm}^{-1}$ : 2977 (NH), 2876 (C-H), 1695 (C=O), 1537 (C=N). MS (EI)  $m/z$  (%): 341 ( $\text{M}^+$ , 8), 184 (40), 169 (38), 156 (30), 114 (47), 95 (17), 70 (38), 57 (100). HRMS: Calculated for  $[\text{C}_{17}\text{H}_{32}\text{N}_3\text{O}_4]^+$ : 342.2393 [(M+H) $^+$ ]; found: 342.2394. The ee was

determined by HPLC using a Chiralpak IC column [*n*-hexane/*i*PrOH (90:10)]; flow rate 1.00 mL/min;  $\tau_{\text{major}} = 5.957$  min,  $\tau_{\text{minor}} = 7.067$  min (72% ee).  $[\alpha]_{\text{D}}^{20} = -42.5$  ( $c = 1.0$ ,  $\text{CH}_2\text{Cl}_2$ ).

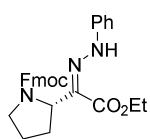

**(S)-(9H-Fluoren-9-yl)methyl-(Z)-2-[2-ethoxy-2-oxo-1-(2-**

**phenylhydrazono)ethyl]pyrrolidine-1-carboxylate (4f).** Following the *GP-F* with slight modification, **4f** (58.2 mg, 0.120 mmol) was isolated by FC (hexanes/EtOAc gradient from 19:1 to 7:3) after 72h in 93% yield as an orange oil starting from ethyl (*E*)-2-(2-phenyl)hydrazono)acetate **1c** (24.9 mg, 0.13 mmol) and *N*-Fmoc-2,3-dihydro-1*H*-pyrrole **2b**

(5 × 9.5 mg + 1 × 9.3 mg every 1h 30 min, 0.195 mmol) added in portions in the presence of catalyst (*R*)-TRIP (9.8 mg, 0.013 mmol), MS (4Å, 38 mg) and using dry toluene (0.26 mL) as solvent at 10 °C. <sup>1</sup>H NMR (300 MHz,  $\text{CDCl}_3$ ): (1.2:1 rotamer ratio, \*denotes minor rotamer resonances)  $\delta$  12.05\* (s, 1H, NH), 11.93 (s, 1H, NH), 7.78 (d,  $J = 7.5$  Hz, 1H,  $\text{C}_{\text{Ar}}\text{-H}$ ), 7.72-7.61 (m, 2H,  $\text{C}_{\text{Ar}}\text{-H}$ ), 7.50-7.27 (m, 5H,  $\text{C}_{\text{Ar}}\text{-H}$ ), 7.23-7.06 (m, 4H,  $\text{C}_{\text{Ar}}\text{-H}$ ), 7.01-6.85 (m, 1H,  $\text{C}_{\text{Ar}}\text{-H}$ ), 5.09\* (dd,  $J = 7.5, 2.3$  Hz, 1H,  $\text{C}_2\text{-H}$ ), 4.89-4.77 (m, 1H,  $\text{C}_2\text{-H}$ ), 4.58-4.44 (m, 1H,  $\text{CHCH}_2\text{O}$ ), 4.40-4.00 (m, 4H,  $\text{CHCH}_2\text{O} + \text{CH}_2\text{CH}_3$ ), 3.85-3.44 (m, 2H,  $\text{C}_5\text{-H}$ ), 2.30-1.80 (m, 4H,  $\text{C}_3\text{-H} + \text{C}_4\text{-H}$ ), 1.38-1.32 (m, 3H,  $\text{CH}_2\text{CH}_3$ ); <sup>13</sup>C NMR (75 MHz,  $\text{CDCl}_3$ ):  $\delta$  164.4 (COO), 162.9\* (NCO), 162.6 (NCO), 154.9 (CN), 154.7\* (CN), 144.5\* ( $\text{C}_{\text{Ar}}\text{-C}$ ), 144.2 ( $\text{C}_{\text{Ar}}\text{-C}$ ), 144.2 ( $\text{C}_{\text{Ar}}\text{-C}$ ), 144.2\* ( $\text{C}_{\text{Ar}}\text{-C}$ ), 143.5\* ( $\text{C}_{\text{Ar}}\text{-C}$ ), 143.3 ( $\text{C}_{\text{Ar}}\text{-C}$ ), 142.8\* ( $\text{C}_{\text{Ar}}\text{-C}$ ), 141.4 ( $\text{C}_{\text{Ar}}\text{-C}$ ), 141.2 ( $\text{C}_{\text{Ar}}\text{-C}$ ), 129.5 ( $\text{C}_{\text{Ar}}\text{-H}$ ), 129.4 ( $\text{C}_{\text{Ar}}\text{-H}$ ), 129.3\* ( $\text{C}_{\text{Ar}}\text{-H}$ ), 127.7 ( $\text{C}_{\text{Ar}}\text{-H}$ ), 127.5 ( $\text{C}_{\text{Ar}}\text{-H}$ ), 127.5\* ( $\text{C}_{\text{Ar}}\text{-H}$ ), 127.1\* ( $\text{C}_{\text{Ar}}\text{-H}$ ), 127.1 ( $\text{C}_{\text{Ar}}\text{-H}$ ), 127.0 ( $\text{C}_{\text{Ar}}\text{-H}$ ), 126.9\* ( $\text{C}_{\text{Ar}}\text{-H}$ ), 125.8 ( $\text{C}_{\text{Ar}}\text{-H}$ ), 125.3 ( $\text{C}_{\text{Ar}}\text{-H}$ ), 124.8\* ( $\text{C}_{\text{Ar}}\text{-H}$ ), 122.3\* ( $\text{C}_{\text{Ar}}\text{-H}$ ), 122.2 ( $\text{C}_{\text{Ar}}\text{-H}$ ), 122.1 ( $\text{C}_{\text{Ar}}\text{-H}$ ), 120.1 ( $\text{C}_{\text{Ar}}\text{-H}$ ), 120.0\* ( $\text{C}_{\text{Ar}}\text{-H}$ ), 119.8 ( $\text{C}_{\text{Ar}}\text{-H}$ ), 114.0 ( $\text{C}_{\text{Ar}}\text{-H}$ ), 113.8 ( $\text{C}_{\text{Ar}}\text{-H}$ ), 113.7\* ( $\text{C}_{\text{Ar}}\text{-H}$ ), 67.3\* ( $\text{CHCH}_2\text{O}$ ), 66.6 ( $\text{CHCH}_2\text{O}$ ), 60.9 ( $\text{CH}_2\text{CH}_3$ ), 60.8\* ( $\text{CH}_2\text{CH}_3$ ), 58.0\* ( $\text{C}_2$ ), 57.7 ( $\text{C}_2$ ), 47.6\* ( $\text{CHCH}_2\text{O}$ ), 47.4 ( $\text{CHCH}_2\text{O}$ ), 47.0 ( $\text{C}_5$ ), 46.6\* ( $\text{C}_5$ ), 32.2 ( $\text{C}_3$ ), 31.4\* ( $\text{C}_3$ ), 23.2\* ( $\text{C}_4$ ), 22.0 ( $\text{C}_4$ ), 14.4\* ( $\text{CH}_2\text{CH}_3$ ), 14.3 ( $\text{CH}_2\text{CH}_3$ ); R<sub>f</sub>: 0.54 (hexanes/EtOAc 7:3); IR (ATR)  $\text{cm}^{-1}$ : 2980 (NH), 2810 (C-H), 1695 (C=O), 1551 (C=N); MS (EI)  $m/z$  (%): 178 (100), 152 (12), 88 (9), 76 (13); HRMS: Calculated for  $[\text{C}_{29}\text{H}_{30}\text{N}_3\text{O}_4]^+$ : 484.2236 [(M+H)<sup>+</sup>]; found: 484.2238; The ee was determined by HPLC using a Chiralcel OD-3 column [*n*-hexane/*i*PrOH (80:20)]; flow rate 1.00 mL/min;  $\tau_{\text{major}} = 21.319$  min,  $\tau_{\text{minor}} = 61.500$  min (92% ee);  $[\alpha]_{\text{D}}^{20} = -5.5$  ( $c = 1.0$ ,  $\text{CH}_2\text{Cl}_2$ ).

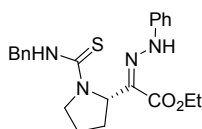

**(S)-Ethyl-(Z)-2-[1-(benzylcarbamothioyl)pyrrolidin-2-yl]-2-(2-**

**phenylhydrazono)acetate (4h).** Following *GP-F*, **4h** (35.3 mg, 0.086 mmol) was isolated by FC (petroleum ether/EtOAc gradient from 19:1 to 7:3) after 2h in 95% yield as a yellow solid starting from ethyl (*E*)-2-(2-phenylhydrazono)acetate **1c** (17.2 mg, 0.09

mmol) and *N*-benzyl-2,3-dihydro-1*H*-pyrrole-1-carbothioamide **2d** (29.5 mg, 0.135 mmol) in the presence of catalyst (*R*)-TRIP (6.8 mg, 0.009 mmol), MS (4Å, 27 mg) and using dry toluene (0.18 mL) as solvent. R<sub>f</sub>: 0.35 (hexanes/EtOAc 7:3). <sup>1</sup>H NMR (500 MHz,  $\text{DMSO}-d_6$ , 100 °C): (*Z:E* ratio: 5.8:1, \*denotes *E* diastereoisomer resonances)  $\delta$  11.68 (s, 1H, NNH), 9.70\* (s, 1H, NNH), 7.56\* (s, 1H, CSNH), 7.48 (s, 1H, CSNH), 7.35-7.13 (m, 7H,  $\text{C}_{\text{Ar}}\text{-H} + \text{C}_{\text{Ar}}\text{-H}^*$ ), 7.13-7.01 (m, 2H,  $\text{C}_{\text{Ar}}\text{-H} + \text{C}_{\text{Ar}}\text{-H}^*$ ), 6.95 (dd,  $J = 6.5, 1.2$  Hz, 1H,  $\text{C}_{\text{Ar}}\text{-H}$ ), 6.90-6.85\* (m, 1H,  $\text{C}_{\text{Ar}}\text{-H}$ ), 5.49\* (dd,  $J = 8.2, 5.8$  Hz, 1H,  $\text{C}_2\text{-H}$ ), 5.45-5.38 (m, 1H,  $\text{C}_2\text{-H}$ ), 4.88-4.66 (m, 2H,  $\text{NHCH}_2 + \text{NHCH}_2^*$ ), 4.38-4.20 (m, 2H,  $\text{CH}_2\text{CH}_3$ ), 4.15\* (q,  $J = 7.1$  Hz, 2H,  $\text{CH}_2\text{CH}_3$ ), 3.81 (ddd,  $J = 11.8, 8.7, 3.3$  Hz, 1H,  $\text{C}_5\text{-H}_a$ ), 3.85-3.61 (m, 1H,  $\text{C}_5\text{-H}_a^* + \text{C}_5\text{-H}_b + \text{C}_5\text{-H}_b^*$ ), 2.37-2.27\* (m, 1H,  $\text{C}_3\text{-H}_a$ ), 2.27-2.18 (m, 1H,  $\text{C}_3\text{-H}_a$ ), 2.18-2.12\* (m, 1H,  $\text{C}_3\text{-H}_b$ ), 2.12-1.92 (m, 3H,  $\text{C}_3\text{-H}_b + \text{C}_4\text{-H} + \text{C}_4\text{-H}_a^*$ ), 1.92-1.81\* (m, 2H,  $\text{C}_4\text{-H}_b$ ), 1.33 (t,  $J = 7.1$  Hz, 3H,  $\text{CH}_3$ ), 1.24\* (t,  $J = 7.1$  Hz, 3H,  $\text{CH}_3$ ). <sup>13</sup>C NMR (125 MHz,  $\text{DMSO}-d_6$ ):  $\delta$  179.0 (CS), 178.5\* (CS), 162.8\* (CO), 161.4 (CO), 144.2 (CN), 143.1 ( $\text{C}_{\text{Ar}}\text{-C}$ ), 139.4 ( $\text{C}_{\text{Ar}}\text{-C}$ ), 139.4\* ( $\text{C}_{\text{Ar}}\text{-C}$ ), 128.6 ( $\text{C}_{\text{Ar}}\text{-H}$ ), 128.3\* ( $\text{C}_{\text{Ar}}\text{-H}$ ), 127.3\* ( $\text{C}_{\text{Ar}}\text{-H}$ ), 127.3 ( $\text{C}_{\text{Ar}}\text{-H}$ ), 126.5\* ( $\text{C}_{\text{Ar}}\text{-H}$ ), 126.4 ( $\text{C}_{\text{Ar}}\text{-H}$ ), 125.8\* ( $\text{C}_{\text{Ar}}\text{-H}$ ), 125.7 ( $\text{C}_{\text{Ar}}\text{-H}$ ), 121.1 ( $\text{C}_{\text{Ar}}\text{-H}$ ), 120.2\* ( $\text{C}_{\text{Ar}}\text{-H}$ ), 113.3\* ( $\text{C}_{\text{Ar}}\text{-H}$ ), 113.2 ( $\text{C}_{\text{Ar}}\text{-H}$ ), 60.3 ( $\text{C}_2$ ), 60.1 ( $\text{CH}_2\text{CH}_3$ ), 59.2\* ( $\text{CH}_2\text{CH}_3$ ), 57.5\* ( $\text{C}_2$ ), 48.9 ( $\text{C}_5$ ), 48.4\* ( $\text{C}_5$ ), 47.5 ( $\text{NHCH}_2$ ), 30.4 ( $\text{C}_3$ ), 28.4\* ( $\text{C}_3$ ), 23.9\* ( $\text{C}_4$ ), 22.0 ( $\text{C}_4$ ), 13.6\* ( $\text{CH}_2\text{CH}_3$ ), 13.4 ( $\text{CH}_2\text{CH}_3$ ). IR (ATR)  $\text{cm}^{-1}$ : 3264 (NH), 2977 (NH), 2820 (C-H), 1679 (C=O), 1530 (C=N), 1236 (C=S), 1149 (C-N). MS (EI)  $m/z$  (%): 149 (17), 91 (100), 83 (10), 65 (16), 51 (5). HRMS: Calculated for  $[\text{C}_{22}\text{H}_{27}\text{N}_4\text{O}_2\text{S}]^+$ : 411.1855 [(M+H)<sup>+</sup>]; found: 411.1858; The ee was determined by HPLC using a Chiralpak IC column [*n*-hexane/*i*PrOH (85:15)]; flow rate 1.00 mL/min;  $\tau_{\text{major}} = 18.766$  min,  $\tau_{\text{minor}} = 27.998$  min (92% ee).  $[\alpha]_{\text{D}}^{20} = -119.9$  ( $c = 1.0$ ,  $\text{CH}_2\text{Cl}_2$ ). M.p. ( $\text{CH}_2\text{Cl}_2$ ): 124-126 °C.

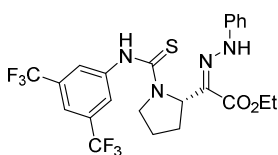

**(S)-Ethyl-(Z)-2-[1-[(3,5-**

**bis(trifluoromethyl)phenyl)carbamothioyl]pyrrolidin-2-yl]-2-(2-**

**phenylhydrazono)acetate (4i).** Following *GP-F*, **4i** (47 mg, 0.088 mmol) was isolated by FC (petroleum ether/EtOAc gradient from 19:1 to 7:3) after 2h in 98%



yield as a light yellow solid starting from ethyl (*E*)-2-(2-phenyl)hydrazono)acetate **1c** (17.2 mg, 0.09 mmol) and *N*-(3,5-bis(trifluoromethyl)phenyl)-2,3-dihydro-1*H*-pyrrole-1-carbothioamide **2e** (45.9 mg, 0.135 mmol) in the presence of catalyst (*R*)-TRIP (3.4 mg, 0.0045 mmol), MS (4Å, 27 mg) and using dry toluene (0.18 mL) as solvent. *R*<sub>f</sub>: 0.67 (hexanes/EtOAc 7:3). <sup>1</sup>H NMR (500 MHz, DMSO-*d*<sub>6</sub>, 100 °C): (*Z*:*E* ratio: 5.0:1, \*denotes *E* diastereoisomer resonances) δ 11.68 (s, 1H, NNH), 9.83\* (s, 1H, NNH), 9.31\* (s, 1H, CSNH), 9.20 (s, 1H, CSNH), 8.18\* (s, 2H, C<sub>Ar</sub>-H), 8.13 (s, 2H, C<sub>Ar</sub>-H), 7.64\* (s, 1H, C<sub>Ar</sub>-H), 7.63 (s, 1H, C<sub>Ar</sub>-H), 7.30-7.20 (m, 4H, C<sub>Ar</sub>-H), 6.97-6.92 (m, 1H, C<sub>Ar</sub>-H), 6.91-6.86\* (m, 1H, C<sub>Ar</sub>-H), 5.58-5.50 (m, C<sub>2</sub>-H), 4.41-4.25 (m, 2H, CH<sub>2</sub>CH<sub>3</sub>), 4.18\* (q, *J* = 7.1 Hz, 2H, CH<sub>2</sub>CH<sub>3</sub>), 4.02-3.92 (m, 1H, C<sub>5</sub>-H<sub>a</sub>), 3.92-3.82 (m, 1H, C<sub>5</sub>-H<sub>b</sub>), 2.45-2.37\* (m, 1H, C<sub>3</sub>-H<sub>a</sub>), 2.37-2.27 (m, 1H, C<sub>3</sub>-H<sub>a</sub>), 2.27-2.17\* (m, 1H, C<sub>3</sub>-H<sub>b</sub>), 2.17-2.00 (m, 3H, C<sub>3</sub>-H<sub>b</sub> + C<sub>4</sub>-H), 2.00-1.90\* (m, 2H, C<sub>4</sub>-H), 1.35 (t, *J* = 7.1 Hz, 3H, CH<sub>3</sub>), 1.26\* (t, *J* = 7.1 Hz, 3H, CH<sub>3</sub>). <sup>13</sup>C NMR (125 MHz, DMSO-*d*<sub>6</sub>, 100 °C): δ 177.7 (CS), 176.7\* (CS), 162.7\* (CO), 161.3 (CO), 144.1 (C<sub>Ar</sub>-C), 143.0 (CN), 142.5 (C<sub>Ar</sub>-C), 142.4\* (C<sub>Ar</sub>-C), 129.4 (q, <sup>2</sup>*J*<sub>C-F</sub> = 32.9 Hz, CCF<sub>3</sub>), 128.6 (C<sub>Ar</sub>-H), 128.4\* (C<sub>Ar</sub>-H), 124.0 (q, <sup>3</sup>*J*<sub>C-F</sub> = 3.9 Hz, C<sub>Ar</sub>-H), 123.3\* (C<sub>Ar</sub>-H), 122.8 (q, <sup>1</sup>*J*<sub>C-F</sub> = 272.7 Hz, CF<sub>3</sub>), 121.3 (C<sub>Ar</sub>-H), 120.5\* (C<sub>Ar</sub>-H), 115.9 (q, <sup>3</sup>*J*<sub>C-F</sub> = 3.9 Hz, C<sub>Ar</sub>-H), 115.7\* (C<sub>Ar</sub>-H), 113.5\* (C<sub>Ar</sub>-H), 113.2 (C<sub>Ar</sub>-H), 61.1 (C<sub>2</sub>), 60.2 (CH<sub>2</sub>CH<sub>3</sub>), 59.3\* (CH<sub>2</sub>CH<sub>3</sub>), 57.8\* (C<sub>2</sub>), 50.1 (C<sub>5</sub>), 30.6 (C<sub>3</sub>), 28.5\* (C<sub>3</sub>), 24.0\* (C<sub>4</sub>), 22.2 (C<sub>4</sub>), 13.5\* (CH<sub>2</sub>CH<sub>3</sub>), 13.4 (CH<sub>2</sub>CH<sub>3</sub>). <sup>19</sup>F NMR (282 MHz, DMSO-*d*<sub>6</sub>): δ -61.3\* (CF<sub>3</sub>), -61.7 (CF<sub>3</sub>). IR (ATR) cm<sup>-1</sup>: 3262 (NH), 2983 (NH), 2830 (C-H), 1683 (C=O), 1550 (C=N), 1277 (C=S), 1132 (C-N). MS (EI) *m/z* (%): 271 (100), 252 (25), 213 (24), 202 (13), 163 (16), 143 (9), 83 (29), 69 (10); HRMS: Calculated for [C<sub>23</sub>H<sub>23</sub>N<sub>4</sub>O<sub>2</sub>SF<sub>6</sub>]<sup>+</sup>: 533.1446 [(M+H)<sup>+</sup>]; found: 533.1451. The ee was determined by HPLC using a Chiralpak AD-H column [*n*-hexane/*i*PrOH (90:10)]; flow rate 1.00 mL/min; τ<sub>major</sub> = 15.395 min, τ<sub>minor</sub> = 5.896 min (>99% ee). [α]<sub>D</sub><sup>20</sup>: -157.6 (*c* = 1.0, CH<sub>2</sub>Cl<sub>2</sub>). M.p. (CH<sub>2</sub>Cl<sub>2</sub>): 127-129 °C.

**The reaction was carried out with 1 mol% of catalyst loading:** Following *GP-F*, **4i** (41 mg, 0.077 mmol) was isolated by FC (petroleum ether/EtOAc gradient from 19:1 to 7:3) after 2h in 86% yield (>99% ee) as a light yellow solid starting from ethyl (*E*)-2-(2-phenyl)hydrazono)acetate **1c** (17.2 mg, 0.09 mmol) and *N*-(3,5-bis(trifluoromethyl)phenyl)-2,3-dihydro-1*H*-pyrrole-1-carbothioamide **2e** (45.9 mg, 0.135 mmol) in the presence of catalyst (*R*)-TRIP (0.68 mg, 0.0009 mmol), MS (4Å, 27 mg) and using dry toluene (0.18 mL) as solvent. *R*<sub>f</sub>: 0.67 (hexanes/EtOAc 7:3).

**The reaction was carried out in a bigger scale:** Following *GP-F*, **4i** (199 mg, 0.37 mmol) was isolated by FC (petroleum ether/EtOAc gradient from 19:1 to 7:3) after 2h in 93% yield (>99% ee) as a light yellow solid starting from ethyl (*E*)-2-(2-phenyl)hydrazono)acetate **1c** (76.4 mg, 0.40 mmol) and *N*-(3,5-bis(trifluoromethyl)phenyl)-2,3-dihydro-1*H*-pyrrole-1-carbothioamide **2e** (204 mg, 0.60 mmol) in the presence of catalyst (*R*)-TRIP (15.1 mg, 0.002 mmol), MS (4Å, 120 mg) and using dry toluene (0.82 mL) as solvent.

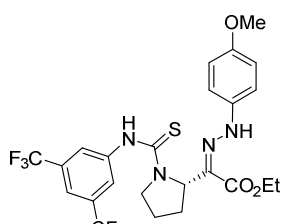

**(S)-Ethyl-(Z)-2-{1-[(3,5-bis(trifluoromethyl)phenyl)carbamothioyl]pyrrolidin-2-yl}-2-[2-(4-methoxyphenyl)hydrazono]acetate (**4j**).** Following *GP-F*, **4j** (43.1 mg, 0.0766 mmol) was isolated by FC (petroleum ether/EtOAc gradient from 19:1 to 7:3) after 2h in 85% yield as a yellow solid starting from ethyl (*E*)-2-(2-(4-methoxyphenyl)hydrazono)acetate **1a** (20.0 mg, 0.09 mmol) and *N*-(3,5-bis(trifluoromethyl)phenyl)-2,3-dihydro-1*H*-pyrrole-1-carbothioamide **2e** (45.9 mg, 0.135 mmol) in the presence of catalyst (*R*)-TRIP (3.4 mg, 0.0045 mmol), MS (4Å, 27 mg) and using dry toluene (0.18 mL) as solvent. *R*<sub>f</sub>: 0.59 (hexanes/EtOAc 7:3); <sup>1</sup>H NMR (500 MHz, DMSO-*d*<sub>6</sub>, 100 °C): (*Z*:*E* ratio: 6.7:1, \*denotes *E* diastereoisomer resonances) δ 11.67 (s, 1H, NNH), 9.71\* (s, 1H, NNH), 9.28\* (s, 1H, CSNH), 9.17 (s, 1H, CSNH), 8.18\* (s, 2H, C<sub>Ar</sub>-H), 8.13 (s, 2H, C<sub>Ar</sub>-H), 7.63 (s, 1H, C<sub>Ar</sub>-H), 7.18 (d, *J* = 8.7 Hz, 2H, C<sub>Ar</sub>-H), 6.88 (d, *J* = 8.7 Hz, 2H, C<sub>Ar</sub>-H), 5.55-5.49 (m, 1H, C<sub>2</sub>-H), 4.39-4.22 (m, 2H, CH<sub>2</sub>CH<sub>3</sub>), 4.16\* (q, *J* = 7.1 Hz, 2H, CH<sub>2</sub>CH<sub>3</sub>), 4.00-3.81 (m, 2H, C<sub>5</sub>-H), 3.73 (s, 3H, OCH<sub>3</sub>), 2.44-2.26 (m, 1H, C<sub>3</sub>-H<sub>a</sub>), 2.26-1.91 (m, 3H, C<sub>3</sub>-H<sub>b</sub> + C<sub>4</sub>-H), 1.34 (t, *J* = 7.1 Hz, 3H, CH<sub>2</sub>CH<sub>3</sub>), 1.25\* (t, *J* = 7.1 Hz, 3H, CH<sub>2</sub>CH<sub>3</sub>). <sup>13</sup>C NMR (125 MHz, DMSO-*d*<sub>6</sub>, 100 °C): δ 177.7 (CS), 176.7\* (CS), 162.8\* (CO), 161.4 (CO), 154.7 (C<sub>Ar</sub>-C), 154.0\* (C<sub>Ar</sub>-C), 142.5 (CN), 142.4\* (CN), 138.0\* (C<sub>Ar</sub>-C), 136.9 (C<sub>Ar</sub>-C), 132.5 (C<sub>Ar</sub>-C), 129.4 (q, <sup>2</sup>*J*<sub>C-F</sub> = 32.7 Hz, CCF<sub>3</sub>), 124.0 (q, <sup>3</sup>*J*<sub>C-F</sub> = 3.8 Hz, C<sub>Ar</sub>-H), 123.9\* (C<sub>Ar</sub>-H), 122.8 (q, <sup>1</sup>*J*<sub>C-F</sub> = 273.1 Hz, CF<sub>3</sub>), 115.9 (q, <sup>3</sup>*J*<sub>C-F</sub> = 3.8 Hz, C<sub>Ar</sub>-H), 115.6\* (C<sub>Ar</sub>-H), 114.6\* (C<sub>Ar</sub>-H), 114.5 (C<sub>Ar</sub>-H), 114.4 (C<sub>Ar</sub>-H), 114.2\* (C<sub>Ar</sub>-H), 61.1 (C<sub>2</sub>), 60.0 (CH<sub>2</sub>CH<sub>3</sub>), 59.2\* (CH<sub>2</sub>CH<sub>3</sub>), 57.7\* (C<sub>2</sub>), 55.1 (OCH<sub>3</sub>), 50.1 (C<sub>5</sub>), 30.7 (C<sub>3</sub>), 28.5\* (C<sub>3</sub>), 24.0\* (C<sub>4</sub>), 22.1 (C<sub>4</sub>), 13.5\* (CH<sub>2</sub>CH<sub>3</sub>), 13.4 (CH<sub>2</sub>CH<sub>3</sub>). <sup>19</sup>F NMR (282 MHz, DMSO-*d*<sub>6</sub>): δ -61.6 (CF<sub>3</sub>). IR (ATR) cm<sup>-1</sup>: 3231 (NH), 2955 (NH), 2830 (C-H), 1679 (C=O), 1550 (C=N), 1275 (C=S), 1131 (C-N). MS (EI) *m/z* (%): 149 (17), 91 (100), 83 (10), 65 (16). HRMS: Calculated for [C<sub>23</sub>H<sub>25</sub>N<sub>4</sub>O<sub>3</sub>SF<sub>6</sub>]<sup>+</sup>:



563.1552 [(M+H)<sup>+</sup>]; found: 563.1566. The ee was determined by HPLC using a Chiralpak AD-H column [*n*-hexane/*i*PrOH (90:10)]; flow rate 1.00 mL/min;  $\tau_{\text{major}} = 14.567$  min,  $\tau_{\text{minor}} = 9.426$  min (98% ee).  $[\alpha]_{\text{D}}^{20}$ : -96.0 (*c* = 1.0, CH<sub>2</sub>Cl<sub>2</sub>). M.p. (CH<sub>2</sub>Cl<sub>2</sub>): 128-130 °C.

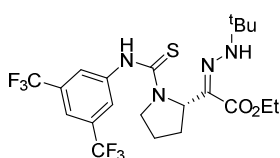

**(S)-Ethyl-(Z)-2-{1-[(3,5-bis(trifluoromethyl)phenyl)carbamothioyl]pyrrolidin-2-yl}-2-[2-(*tert*-butyl)hydrazono]acetate (4k).** Following *GP-F*, **4k** (36.9 mg, 0.072 mmol) was isolated by FC (petroleum ether/EtOAc gradient from 19:1 to 7:3) after 2h in 80% yield as a white solid starting from ethyl (*E*)-2-(2-(*tert*-butyl)hydrazono)acetate **1e** (15.5 mg, 0.09 mmol) and *N*-(3,5-bis(trifluoromethyl)phenyl)-2,3-dihydro-1*H*-pyrrole-1-carbothioamide **2e** (45.9

mg, 0.135 mmol) in the presence of catalyst (*R*)-TRIP (3.4 mg, 0.0045 mmol), MS (4Å, 27 mg) and using dry toluene (0.18 mL) as solvent. R<sub>f</sub>: 0.69 (hexanes/EtOAc 7:3). <sup>1</sup>H NMR (500 MHz, DMSO-*d*<sub>6</sub>, 100 °C): (*Z*:*E* ratio: >20:1)  $\delta$  9.75 (bs, 1H, NH), 9.03 (bs, 1H, CSNH), 8.12 (s, 2H, C<sub>Ar</sub>-H), 7.64 (s, 1H, C<sub>Ar</sub>-H), 5.44-5.37 (m, 1H, C<sub>2</sub>-H), 4.30-4.13 (m, 2H, CH<sub>2</sub>CH<sub>3</sub>), 3.88-3.73 (m, 2H, C<sub>5</sub>-H), 2.29-2.17 (m, 1H, C<sub>3</sub>-H<sub>a</sub>), 2.05-1.92 (m, 3H, C<sub>3</sub>-H<sub>b</sub> + C<sub>4</sub>-H), 1.29 (t, *J* = 7.1 Hz, 3H, CH<sub>2</sub>CH<sub>3</sub>), 1.19 (s, 9H, C(CH<sub>3</sub>)<sub>3</sub>). <sup>13</sup>C NMR (125 MHz, DMSO-*d*<sub>6</sub>, 100 °C):  $\delta$  177.4 (CS), 161.2 (CO), 142.6 (CN), 130.5 (C<sub>Ar</sub>-C), 129.3 (q, <sup>2</sup>*J*<sub>C-F</sub> = 33.0 Hz, CCF<sub>3</sub>), 123.9 (C<sub>Ar</sub>-H), 122.9 (q, <sup>1</sup>*J*<sub>C-F</sub> = 272.1 Hz, CF<sub>3</sub>), 115.7 (C<sub>Ar</sub>-H), 60.8 (C<sub>2</sub>), 59.3 (CH<sub>2</sub>CH<sub>3</sub>), 53.6 (C(CH<sub>3</sub>)<sub>3</sub>), 50.2 (C<sub>5</sub>), 30.8 (C<sub>3</sub>), 27.8 (C(CH<sub>3</sub>)<sub>3</sub>), 21.8 (C<sub>4</sub>), 13.5 (CH<sub>2</sub>CH<sub>3</sub>). <sup>19</sup>F NMR (282 MHz, DMSO-*d*<sub>6</sub>):  $\delta$  -61.6 (CF<sub>3</sub>). IR (ATR) cm<sup>-1</sup>: 3266 (NH), 2976 (NH), 2850 (C-H), 1678 (C=O), 1537 (C=N), 1275 (C=S), 1126 (C-N). MS (EI) *m/z* (%): 271 (100), 252 (23), 213 (23), 202 (9), 163 (12), 83 (13). HRMS: Calculated for [C<sub>21</sub>H<sub>27</sub>N<sub>4</sub>O<sub>2</sub>SF<sub>6</sub>]<sup>+</sup>: 513.1759 [(M+H)<sup>+</sup>]; found: 513.1779. The ee was determined by HPLC using a Chiralcel OD-3 column [*n*-hexane/*i*PrOH (92:08)]; flow rate 1.00 mL/min;  $\tau_{\text{major}} = 3.761$  min,  $\tau_{\text{minor}} = 4.230$  min (91% ee).  $[\alpha]_{\text{D}}^{20}$ : -46.9 (*c* = 1.0, CH<sub>2</sub>Cl<sub>2</sub>). M.p. (CH<sub>2</sub>Cl<sub>2</sub>): 76-78 °C.

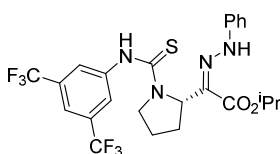

**(S)-Isopropyl-(Z)-2-{1-[(3,5-bis(trifluoromethyl)phenyl)carbamothioyl]pyrrolidin-2-yl}-2-phenylhydrazonoacetate (4l).** Following *GP-F*, **4l** (42.8 mg, 0.078 mmol) was isolated by FC (petroleum ether/EtOAc gradient from 19:1 to 7:3) after 2h in 87% yield as a light yellow solid starting from isopropyl (*E*)-2-(2-phenylhydrazono)acetate **1f** (18.6 mg, 0.09 mmol) and *N*-(3,5-bis(trifluoromethyl)phenyl)-2,3-dihydro-1*H*-pyrrole-1-carbothioamide **2e** (45.9 mg, 0.135 mmol) in the presence of catalyst (*R*)-TRIP (3.4 mg, 0.0045 mmol), MS (4Å, 27 mg) and using dry toluene (0.18 mL) as solvent. R<sub>f</sub>: 0.67 (hexanes/EtOAc 7:3). <sup>1</sup>H NMR (500 MHz, DMSO-*d*<sub>6</sub>, 100 °C): (*Z*:*E* ratio: 7.8:1, \*denotes *E* diastereoisomer resonances)  $\delta$  11.72 (s, 1H, NNH), 9.77\* (s, 1H, NNH), 9.20 (s, 1H, CSNH), 8.18\* (s, 2H, C<sub>Ar</sub>-H), 8.14 (s, 2H, C<sub>Ar</sub>-H), 7.65\* (s, 1H, C<sub>Ar</sub>-H), 7.63 (s, 1H, C<sub>Ar</sub>-H), 7.34-7.13 (m, 4H, C<sub>Ar</sub>-H), 6.98-6.92 (m, 1H, C<sub>Ar</sub>-H), 6.91-6.86\* (m, 1H, C<sub>Ar</sub>-H), 5.56-5.49 (m, 1H, C<sub>2</sub>-H), 5.19-5.09 (m, 1H, CH(CH<sub>3</sub>)<sub>2</sub>), 5.04-4.96\* (m, 1H, CH(CH<sub>3</sub>)<sub>2</sub>), 4.05-3.77 (m, 2H, C<sub>5</sub>-H), 2.46-2.38\* (m, 1H, C<sub>3</sub>-H<sub>a</sub>), 2.38-2.27 (m, 1H, C<sub>3</sub>-H<sub>a</sub>), 2.26-2.18\* (m, 1H, C<sub>3</sub>-H<sub>b</sub>), 2.18-1.90 (m, 3H, C<sub>3</sub>-H<sub>b</sub> + C<sub>4</sub>-H), 1.35 (d, *J* = 6.1 Hz, 6H, CH(CH<sub>3</sub>)<sub>2</sub>), 1.27\* (d, *J* = 6.3 Hz, 3H, CH(CH<sub>3</sub>)), 1.25\* (d, *J* = 6.3 Hz, 3H, CH(CH<sub>3</sub>)). <sup>13</sup>C NMR (125 MHz, DMSO-*d*<sub>6</sub>, 100 °C):  $\delta$  177.7 (CS), 176.6\* (CS), 162.2\* (COO), 160.9 (COO), 144.2\* (C<sub>Ar</sub>-C), 143.0 (C<sub>Ar</sub>-C), 142.5 (CN), 142.3\* (CN), 134.5 (C<sub>Ar</sub>-C), 129.4 (q, <sup>2</sup>*J*<sub>C-F</sub> = 32.9 Hz, CCF<sub>3</sub>), 128.6 (C<sub>Ar</sub>-H), 128.3\* (C<sub>Ar</sub>-H), 124.0 (C<sub>Ar</sub>-H), 123.4\* (C<sub>Ar</sub>-H), 123.9 (CF<sub>3</sub>), 121.3 (C<sub>Ar</sub>-H), 120.3\* (C<sub>Ar</sub>-H), 115.9 (tt, *J* = 6.9, 3.3 Hz, C<sub>Ar</sub>-H), 113.4\* (C<sub>Ar</sub>-H), 113.2 (C<sub>Ar</sub>-H), 68.3 (CH(CH<sub>3</sub>)<sub>2</sub>), 66.7\* (CH(CH<sub>3</sub>)<sub>2</sub>), 61.3 (C<sub>2</sub>), 57.9\* (C<sub>2</sub>), 50.0 (C<sub>5</sub>), 30.6 (C<sub>3</sub>), 28.4\* (C<sub>3</sub>), 24.0\* (C<sub>4</sub>), 22.3 (C<sub>4</sub>), 21.0 (CH(CH<sub>3</sub>)<sub>2</sub>), 21.0 (CH(CH<sub>3</sub>)<sub>2</sub>). <sup>19</sup>F NMR (282 MHz, DMSO-*d*<sub>6</sub>):  $\delta$  -61.6 (CF<sub>3</sub>). IR (ATR) cm<sup>-1</sup>: 3227 (NH), 2985 (NH), 2924 (C-H), 1676 (C=O), 1551 (C=N), 1273 (C=S), 1133 (C-N). MS (EI) *m/z* (%): 271 (100), 252 (23), 213 (22), 202 (10), 163 (12), 83 (20). HRMS: Calculated for [C<sub>24</sub>H<sub>25</sub>N<sub>4</sub>O<sub>2</sub>SF<sub>6</sub>]<sup>+</sup>: 547.1602 [(M+H)<sup>+</sup>]; found: 547.1588. The ee was determined by HPLC using a Chiralpak IA column [*n*-hexane/*i*PrOH (90:10)]; flow rate 1.00 mL/min;  $\tau_{\text{major}} = 9.683$  min,  $\tau_{\text{minor}} = 5.086$  min (99% ee).  $[\alpha]_{\text{D}}^{20}$ : -84.3 (*c* = 1.0, CH<sub>2</sub>Cl<sub>2</sub>). M.p. (CH<sub>2</sub>Cl<sub>2</sub>): 139-141 °C.

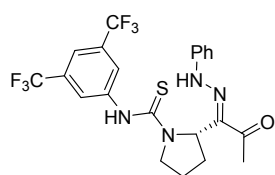

**(S,E)-N-[3,5-bis(trifluoromethyl)phenyl]-2-[2-oxo-1-(2-phenylhydrazono)propyl]pyrrolidine-1-carbothioamide (4m).** Following *GP-F*, **4m** (39.4 mg, 0.078 mmol) was isolated by FC (petroleum ether/EtOAc gradient from 19:1 to 7:3) after 1h in 87% yield as a yellow solid starting from pyruvic aldehyde 1-phenylhydrazone **1g** (14.6 mg, 0.09 mmol) and *N*-(3,5-bis(trifluoromethyl)phenyl)-2,3-dihydro-1*H*-pyrrole-1-carbothioamide **2e** (45.9

mg, 0.135 mmol) in the presence of catalyst (*R*)-TRIP (3.4 mg, 0.0045 mmol), MS (4Å, 27 mg) and using

dry toluene (0.18 mL) as solvent. R<sub>f</sub>: 0.49 (hexanes/EtOAc 6:4). <sup>1</sup>H NMR (500 MHz, DMSO-*d*<sub>6</sub>, 100 °C): (*Z*:*E* ratio: 1:10, \*denotes *Z* diastereoisomer resonances) δ 13.24\* (s, 1H, NNH), 9.98 (s, 1H, NNH), 9.27 (s, 1H, CSNH), 8.20 (s, 2H, C<sub>Ar</sub>-H), 8.15\* (s, 2H, C<sub>Ar</sub>-H), 7.64\* (s, 1H, C<sub>Ar</sub>-H), 7.62 (s, 1H, C<sub>Ar</sub>-H), 7.36-7.22 (m, 4H, C<sub>Ar</sub>-H), 7.02-6.96\* (m, 1H, C<sub>Ar</sub>-H), 6.96-6.85 (m, 1.6 Hz, 1H, C<sub>Ar</sub>-H), 5.61-5.56\* (m, 1H, C<sub>2</sub>-H), 5.49-5.41 (m, 1H, C<sub>2</sub>-H), 3.99-3.76 (m, 2H, C<sub>5</sub>-H), 2.40-2.29 (m, 4H, C<sub>3</sub>-H<sub>a</sub> + CH<sub>3</sub>), 2.24-2.14 (m, 1H, C<sub>4</sub>-H<sub>a</sub>), 2.06-1.95 (m, 1H, C<sub>4</sub>-H<sub>b</sub>), 1.92-1.83 (m, 1H, C<sub>3</sub>-H<sub>b</sub>). <sup>13</sup>C NMR (125 MHz, DMSO-*d*<sub>6</sub>, 100 °C): δ 194.8 (CO), 176.1 (CS), 143.9 (C<sub>Ar</sub>-C), 142.4 (C<sub>Ar</sub>-C), 141.1 (CN), 129.4 (q, <sup>2</sup>J<sub>C-F</sub> = 32.9 Hz, CCF<sub>3</sub>), 128.7\* (C<sub>Ar</sub>-H), 128.6\* (C<sub>Ar</sub>-H), 128.5 (C<sub>Ar</sub>-H), 123.0 (q, <sup>3</sup>J<sub>C-F</sub> = 3.5 Hz, C<sub>Ar</sub>-H), 122.9 (q, <sup>1</sup>J<sub>C-F</sub> = 272.8 Hz, CF<sub>3</sub>), 121.1\* (C<sub>Ar</sub>-H), 120.9 (C<sub>Ar</sub>-H), 115.5 (q, <sup>3</sup>J<sub>C-F</sub> = 3.9 Hz, C<sub>Ar</sub>-H), 113.7\* (C<sub>Ar</sub>-H), 113.6 (C<sub>Ar</sub>-H), 57.3 (C<sub>2</sub>), 57.1\* (C<sub>2</sub>), 51.7\* (C<sub>5</sub>), 50.0 (C<sub>5</sub>), 28.3 (C<sub>3</sub>), 24.6 (CH<sub>3</sub>), 24.2 (C<sub>4</sub>). <sup>19</sup>F NMR (282 MHz, DMSO-*d*<sub>6</sub>): δ -61.6 (CF<sub>3</sub>). IR (ATR) cm<sup>-1</sup>: 3296 (NH), 2968 (NH), 2850 (C-H), 1645 (C=O), 1559 (C=N), 1269 (C=S), 1127 (C-N). MS (EI) *m/z* (%): 271 (100), 252 (23), 213 (21), 202 (11), 163 (12), 83 (25). HRMS: Calculated for [C<sub>22</sub>H<sub>21</sub>N<sub>4</sub>OSF<sub>6</sub>]<sup>+</sup>: 503.1340 [(M+H)<sup>+</sup>]; found: 503.1341. The ee was determined by HPLC using a Chiralcel OD-3 column [*n*-hexane/*i*PrOH (92:08)]; flow rate 1.00 mL/min; τ<sub>major</sub> = 4.522 min, τ<sub>minor</sub> = 14.340 min (>99% ee). [α]<sub>D</sub><sup>20</sup>: +287.1 (*c* = 1.0, CH<sub>2</sub>Cl<sub>2</sub>). M.p. (CH<sub>2</sub>Cl<sub>2</sub>): 190-192 °C.

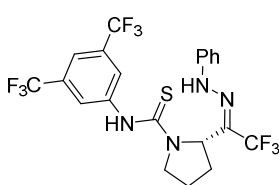

**(*S,E*)-*N*-[3,5-Bis(trifluoromethyl)phenyl]-2-[2,2,2-trifluoro-1-(2-phenylhydrazono)ethyl]pyrrolidine-1-carbothioamide (4n).** Following *GP-F*, **4n** (34.9 mg, 0.066 mmol) was isolated by FC (petroleum ether/EtOAc gradient from 19:1 to 7:3) after 20h in 73% yield as a white solid starting from (*E*)-1-phenyl-2-(2,2,2-trifluoroethylidene)hydrazine **1h** (16.9 mg, 0.09 mmol) and *N*-(3,5-bis(trifluoromethyl)phenyl)-2,3-dihydro-1*H*-pyrrole-1-carbothioamide **2e**

(45.9 mg, 0.135 mmol) in the presence of catalyst (*R*)-TRIP (3.4 mg, 0.0045 mmol), MS (4Å, 27 mg) and using dry toluene (0.18 mL) as solvent. R<sub>f</sub>: 0.37 (hexanes/EtOAc 7:3). <sup>1</sup>H NMR (500 MHz, DMSO-*d*<sub>6</sub>, 100 °C): (*Z*:*E* ratio: 1:16, \*denotes *Z* diastereoisomer resonances) δ 9.86 (s, 1H, NNH), 9.70\* (s, 1H, NNH), 9.53 (s, 1H, CSNH), 9.37\* (s, 1H, CSNH), 8.22 (s, 2H, C<sub>Ar</sub>-H), 8.16\* (s, 2H, C<sub>Ar</sub>-H), 7.69 (s, 1H, C<sub>Ar</sub>-H), 7.66\* (s, 1H, C<sub>Ar</sub>-H), 7.27 (appt t, *J* = 7.8 Hz, 2H, C<sub>Ar</sub>-H), 7.21 (d, *J* = 7.8 Hz, 2H, C<sub>Ar</sub>-H), 6.90 (appt t, *J* = 7.2 Hz, 1H, C<sub>Ar</sub>-H), 5.83-5.70 (m, 1H, C<sub>2</sub>-H), 5.51-5.44\* (m, 1H, C<sub>2</sub>-H), 4.00-3.90 (m, 1H, C<sub>5</sub>-H<sub>a</sub>), 3.83-3.70 (m, 1H, C<sub>5</sub>-H<sub>b</sub>), 2.51-2.39 (m, 1H, C<sub>3</sub>-H<sub>a</sub>), 2.23-2.12 (m, 1H, C<sub>4</sub>-H<sub>a</sub>), 2.11-2.01 (m, 1H, C<sub>4</sub>-H<sub>b</sub>), 2.00-1.92 (m, 1H, C<sub>3</sub>-H<sub>b</sub>). <sup>13</sup>C NMR (125 MHz, DMSO-*d*<sub>6</sub>, 100 °C): δ 178.8 (CS), 143.9 (C<sub>Ar</sub>-C), 142.2 (CN), 129.6 (q, <sup>2</sup>J<sub>C-F</sub> = 33.0 Hz, CCF<sub>3</sub>), 128.4 (C<sub>Ar</sub>-H), 123.6 (C<sub>Ar</sub>-H), 122.8 (q, <sup>1</sup>J<sub>C-F</sub> = 272.8 Hz, CF<sub>3</sub>), 122.1 (q, <sup>1</sup>J<sub>C-F</sub> = 274.1 Hz, CF<sub>3</sub>), 120.5 (C<sub>Ar</sub>-H), 116.1 (q, <sup>3</sup>J<sub>C-F</sub> = 3.5 Hz, C<sub>Ar</sub>-H), 113.2 (C<sub>Ar</sub>-H), 57.1 (C<sub>2</sub>), 49.9 (C<sub>5</sub>), 28.3 (C<sub>3</sub>), 23.8 (C<sub>4</sub>). <sup>19</sup>F NMR (282 MHz, DMSO-*d*<sub>6</sub>): δ -61.6 (CF<sub>3</sub>). IR (ATR) cm<sup>-1</sup>: 3285 (NH), 2924 (NH), 2853 (C-H), 1536 (C=N), 1276 (C=S), 1175 (C-F), 1124 (C-N). MS (EI) *m/z* (%): 271 (100), 252 (24), 213 (24), 202 (10), 163 (12), 83 (29). HRMS: Calculated for [C<sub>21</sub>H<sub>18</sub>N<sub>4</sub>OSF<sub>9</sub>]<sup>+</sup>: 529.1108 [(M+H)<sup>+</sup>]; found: 529.1119. The ee was determined by HPLC using a Chiralpak AS-H column [*n*-hexane/*i*PrOH (95:05)]; flow rate 1.00 mL/min; τ<sub>major</sub> = 59.265 min, τ<sub>minor</sub> = 15.983 min (99% ee). [α]<sub>D</sub><sup>20</sup>: +125.7 (*c* = 1.0, CH<sub>2</sub>Cl<sub>2</sub>). M.p. (CH<sub>2</sub>Cl<sub>2</sub>): 129-131 °C.

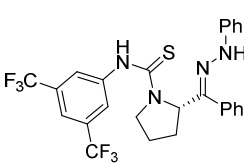

**(*S,E*)-*N*-[3,5-Bis(trifluoromethyl)phenyl]-2-[phenyl(2-phenylhydrazono)methyl]pyrrolidine-1-carbothioamide (4o).** Following *GP-F*, **4o** (45.6 mg, 0.085 mmol) was isolated by FC (petroleum ether/EtOAc gradient from 19:1 to 7:3) after 20h in 94% yield as a white solid starting from (*E*)-1-benzylidene-2-phenylhydrazine **1i** (17.7 mg, 0.09 mmol) and *N*-(3,5-bis(trifluoromethyl)phenyl)-2,3-dihydro-1*H*-pyrrole-1-carbothioamide **2e** (45.9 mg, 0.135 mmol) in the presence of catalyst (*R*)-TRIP

(6.8 mg, 0.009 mmol), MS (4Å, 27 mg) and using dry toluene (0.18 mL) as solvent. R<sub>f</sub>: 0.58 (hexanes/EtOAc 7:3). <sup>1</sup>H NMR (500 MHz, DMSO-*d*<sub>6</sub>, 100 °C): (*E*:*Z* ratio: 4.3:1, \*denotes *Z* diastereoisomer resonances) δ 9.28 (s, 1H, CSNH), 9.11\* (s, 1H, NNH), 8.27 (s, 1H, NNH), 8.20 (s, 2H, C<sub>Ar</sub>-H), 7.98-7.89\* (m, 2H, C<sub>Ar</sub>-H), 7.64 (s, 1H, C<sub>Ar</sub>-H), 7.63\* (s, 1H, C<sub>Ar</sub>-H), 7.58-7.50 (m, 2H, C<sub>Ar</sub>-H), 7.51-7.45 (m, 3H, C<sub>Ar</sub>-H), 7.35-7.28\* (m, 2H, C<sub>Ar</sub>-H), 7.24-7.15\* (m, 3H, C<sub>Ar</sub>-H), 7.14-7.08 (m, 2H, C<sub>Ar</sub>-H), 7.08-7.03 (m, 2H, C<sub>Ar</sub>-H), 6.81-6.76\* (m, 1H, C<sub>Ar</sub>-H), 6.75-6.69 (m, 1H, C<sub>Ar</sub>-H), 5.76-5.72\* (m, 1H, C<sub>2</sub>-H), 5.51-5.43 (m, 1H, C<sub>2</sub>-H), 3.98-3.88 (m, 1H, C<sub>5</sub>-H<sub>a</sub>), 3.88-3.75 (m, 1H, C<sub>5</sub>-H<sub>b</sub>), 2.66-2.55\* (C<sub>3</sub>-H), 2.23-2.12 (m, 1H, C<sub>3</sub>-H<sub>a</sub>), 2.12-1.94 (m, 3H, C<sub>3</sub>-H<sub>b</sub> + C<sub>4</sub>-H). <sup>13</sup>C NMR (125 MHz, DMSO-*d*<sub>6</sub>, 100 °C): δ 178.2\* (CS), 178.0 (CS), 145.6\* (CN), 145.2 (CN), 143.7 (C<sub>Ar</sub>-C), 142.4 (C<sub>Ar</sub>-C), 142.2\* (C<sub>Ar</sub>-C), 132.4 (C<sub>Ar</sub>-C), 129.4 (q, <sup>2</sup>J<sub>C-F</sub> = 32.9 Hz, CCF<sub>3</sub>), 128.7 (C<sub>Ar</sub>-H), 128.5\* (C<sub>Ar</sub>-H), 128.2\* (C<sub>Ar</sub>-H), 128.1 (C<sub>Ar</sub>-H), 127.6 (C<sub>Ar</sub>-H), 127.2\* (C<sub>Ar</sub>-H), 126.8\* (C<sub>Ar</sub>-H), 126.7 (C<sub>Ar</sub>-H), 123.7 (C<sub>Ar</sub>-H), 123.5\* (C<sub>Ar</sub>-H), 122.8 (q, <sup>1</sup>J<sub>C-F</sub> = 272.7 Hz, CF<sub>3</sub>), 118.8\* (C<sub>Ar</sub>-H), 118.6 (C<sub>Ar</sub>-H), 116.1\* (C<sub>Ar</sub>-H), 115.8 (q, <sup>3</sup>J<sub>C-F</sub> = 4.0 Hz, C<sub>Ar</sub>-H), 112.7\* (C<sub>Ar</sub>-H), 112.4 (C<sub>Ar</sub>-H), 65.3 (C<sub>2</sub>),

50.0 (C<sub>5</sub>), 29.2 (C<sub>3</sub>), 28.9\* (C<sub>3</sub>), 22.9\* (C<sub>4</sub>), 22.1 (C<sub>4</sub>). <sup>19</sup>F NMR (282 MHz, DMSO-*d*<sub>6</sub>): δ -61.5 (CF<sub>3</sub>). IR (ATR) cm<sup>-1</sup>: 3335 (NH), 2924 (NH), 2810 (C-H), 1602 (C=N), 1275 (C=S), 1126 (C-N). MS (EI) *m/z* (%): 271 (100), 252 (23), 213 (22), 202 (10), 163 (12), 83 (11). HRMS: Calculated for [C<sub>26</sub>H<sub>23</sub>N<sub>4</sub>SF<sub>6</sub>]<sup>+</sup>: 537.1548 [(M+H)<sup>+</sup>]; found: 537.1543. The ee was determined by HPLC using a Chiralpak IC column [*n*-hexane/*i*PrOH (92:08)]; flow rate 1.00 mL/min; τ<sub>major</sub> = 4.825 min, τ<sub>minor</sub> = 5.576 min (90% ee). [α]<sub>D</sub><sup>20</sup>: +158.0 (*c* = 1.0, CH<sub>2</sub>Cl<sub>2</sub>). M.p. (CH<sub>2</sub>Cl<sub>2</sub>): 56-58 °C.

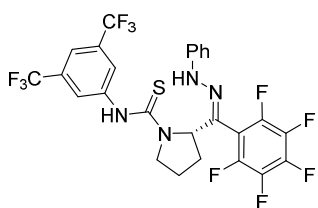

**(*S,Z*)-*N*-[3,5-Bis(trifluoromethyl)phenyl]-2-[(perfluorophenyl)(2-phenylhydrazono)methyl]pyrrolidine-1-carbothioamide (4p).** Following *GP-F*, **4p** (44.0 mg, 0.070 mmol) was isolated by FC (petroleum ether/EtOAc gradient from 19:1 to 7:3) after 20h in 78% yield as a white foam starting from (*E*)-1-((perfluorophenyl)methylene)-2-phenylhydrazine **1j** (25.8 mg, 0.09 mmol) and *N*-(3,5-bis(trifluoromethyl)phenyl)-2,3-dihydro-1*H*-pyrrole-1-carbothioamide **2e** (45.9 mg, 0.135 mmol) in the presence of catalyst (*R*)-TRIP

(6.8 mg, 0.009 mmol), MS (4Å, 27 mg) and using dry toluene (0.18 mL) as solvent. R<sub>f</sub>: 0.49 (hexanes/EtOAc 7:3). <sup>1</sup>H NMR (500 MHz, DMSO-*d*<sub>6</sub>, 100 °C): (*Z:E* ratio: >20:1, \*denotes *E* diastereoisomer resonances) δ 9.66\* (s, 1H, NNH), 9.43\* (s, 1H, CSNH), 9.31 (s, 1H, CSNH), 9.12 (s, 1H, NNH), 8.21\* (s, 2H, C<sub>Ar</sub>-H), 8.13 (s, 2H, C<sub>Ar</sub>-H), 7.64 (s, 1H, C<sub>Ar</sub>-H), 7.23-7.16 (m, 2H, C<sub>Ar</sub>-H), 7.11 (d, *J* = 7.9 Hz, 2H, C<sub>Ar</sub>-H), 6.86-6.79 (m, 1H, C<sub>Ar</sub>-H), 5.88-5.82\* (m, 1H, C<sub>2</sub>-H), 5.73-5.66 (m, 1H, C<sub>2</sub>-H), 3.98-3.75 (m, 2H, C<sub>5</sub>-H), 2.37-2.30 (m, 1H, C<sub>3</sub>-H<sub>a</sub>), 2.26-2.08 (m, 3H, C<sub>3</sub>-H<sub>b</sub> + C<sub>4</sub>-H). <sup>13</sup>C NMR (125 MHz, DMSO-*d*<sub>6</sub>, 100 °C): δ 178.6 (CS), 144.4 (C<sub>Ar</sub>-C), 143.4 (dm, *J*<sub>C-F</sub> = 245.9 Hz, C<sub>6</sub>-F<sub>5</sub>), 142.4 (CN), 142.3 (C<sub>Ar</sub>-C), 137.1 (dm, *J*<sub>C-F</sub> = 249.8 Hz, C<sub>6</sub>-F<sub>5</sub>), 129.5 (q, <sup>2</sup>*J*<sub>C-F</sub> = 32.8 Hz, CCF<sub>3</sub>), 128.3 (C<sub>Ar</sub>-H), 123.1 (C<sub>Ar</sub>-H), 123.1 (q, <sup>1</sup>*J*<sub>C-F</sub> = 272.8 Hz, CF<sub>3</sub>), 119.7 (C<sub>Ar</sub>-H), 115.7 (C<sub>Ar</sub>-H), 112.7 (C<sub>Ar</sub>-H), 107.3 (dm, C<sub>Ar</sub>-C), 63.8 (C<sub>2</sub>), 49.4 (C<sub>5</sub>), 28.4 (C<sub>3</sub>), 22.4 (C<sub>4</sub>). <sup>19</sup>F NMR (282 MHz, DMSO-*d*<sub>6</sub>): δ -61.6 (CF<sub>3</sub>), -137.4 (m, C<sub>6</sub>F<sub>5</sub> *m*-F), -154.3 (m, C<sub>6</sub>F<sub>5</sub> *p*-F), -162.1 (m, C<sub>6</sub>F<sub>5</sub> *o*-F). IR (ATR) cm<sup>-1</sup>: 3269 (NH), 2926 (NH), 1520 (C=N), 1277 (C=S), 1171 (C-F), 1132 (C-N). MS (EI) *m/z* (%): 271 (100), 252 (23), 213 (22), 202 (10), 163 (11). HRMS: Calculated for [C<sub>26</sub>H<sub>18</sub>N<sub>4</sub>SF<sub>11</sub>]<sup>+</sup>: 627.1077 [(M+H)<sup>+</sup>]; found: 627.1086. The ee was determined by HPLC using a Chiralpak AD-H column [*n*-hexane/*i*PrOH (98:02)]; flow rate 1.00 mL/min; τ<sub>major</sub> = 47.899 min, τ<sub>minor</sub> = 57.949 min (97% ee). [α]<sub>D</sub><sup>20</sup>: +15.7 (*c* = 1.0, CH<sub>2</sub>Cl<sub>2</sub>). M.p. (CH<sub>2</sub>Cl<sub>2</sub>): 157-159 °C.

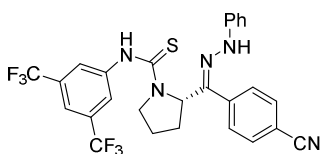

**(*S,E*)-*N*-[3,5-Bis(trifluoromethyl)phenyl]-2-[(4-cyanophenyl)(2-phenylhydrazono)methyl]pyrrolidine-1-carbothioamide (4q).** Following *GP-F*, **4q** (45.6 mg, 0.081 mmol) was isolated by FC (petroleum ether/EtOAc gradient from 19:1 to 7:3) after 20h in 90% yield as a yellow solid starting from (*E*)-4-((2-phenylhydrazono)methyl)benzotrile **1k** (19.9 mg, 0.09 mmol) and *N*-(3,5-bis(trifluoromethyl)phenyl)-2,3-dihydro-1*H*-pyrrole-1-carbothioamide **2e** (45.9 mg, 0.135 mmol) in the presence of catalyst (*R*)-TRIP (6.8 mg, 0.009 mmol), MS (4Å, 27 mg) and using dry toluene (0.18 mL) as solvent. R<sub>f</sub>: 0.43 (hexanes/EtOAc 8:2). <sup>1</sup>H NMR (500 MHz, DMSO-*d*<sub>6</sub>, 100 °C): (*E:Z* ratio: 1.3:1, \*denotes *Z* diastereoisomer resonances) δ 9.37\* (s, 2H, NNH + CSNH), 9.31 (s, 1H, CSNH), 8.60 (s, 1H, NNH), 8.19 (s, 2H, C<sub>Ar</sub>-H), 7.99-7.86 (m, 2H, C<sub>Ar</sub>-H), 7.74-7.59 (m, 2H, C<sub>Ar</sub>-H), 7.26-7.20\* (m, 4H, C<sub>Ar</sub>-H), 7.16-7.10 (m, 2H, C<sub>Ar</sub>-H), 7.10-7.06 (m, 2H, C<sub>Ar</sub>-H), 6.87-6.79\* (m, 1H, C<sub>Ar</sub>-H), 6.77-6.70 (m, 1H, C<sub>Ar</sub>-H), 5.72-5.66\* (m, 1H, C<sub>2</sub>-H), 5.48-5.42 (m, 1H, C<sub>2</sub>-H), 4.05-3.78 (m, 2H, C<sub>5</sub>-H), 2.69-2.60\* (m, 1H, C<sub>3</sub>-H<sub>a</sub>), 2.27-1.90 (m, 3H, C<sub>3</sub>-H + C<sub>4</sub>-H). <sup>13</sup>C NMR (125 MHz, DMSO-*d*<sub>6</sub>, 100 °C): δ 178.4\* (CS), 178.0 (CS), 145.2\* (C<sub>Ar</sub>-C), 145.1 (C<sub>Ar</sub>-C), 142.4 (CNNH), 142.1\* (CNNH), 141.8 (C<sub>Ar</sub>-C), 141.3\* (C<sub>Ar</sub>-C), 137.8 (C<sub>Ar</sub>-C), 132.4 (C<sub>Ar</sub>-H), 131.0\* (C<sub>Ar</sub>-H), 129.4 (q, <sup>2</sup>*J*<sub>C-F</sub> = 32.5 Hz, CCF<sub>3</sub>), 128.9 (C<sub>Ar</sub>-H), 128.3\* (C<sub>Ar</sub>-H), 128.1 (C<sub>Ar</sub>-H), 127.0\* (C<sub>Ar</sub>-H), 123.9 (C<sub>Ar</sub>-H), 123.5\* (C<sub>Ar</sub>-H), 119.4\* (C<sub>Ar</sub>-H), 118.8 (C<sub>Ar</sub>-H), 118.2\* (CN), 117.9 (CN), 116.0 (C<sub>Ar</sub>-H), 112.9\* (C<sub>Ar</sub>-H), 112.5 (C<sub>Ar</sub>-H), 111.3 (C<sub>Ar</sub>-C), 111.2\* (C<sub>Ar</sub>-C), 65.2 (C<sub>2</sub>), 59.4\* (C<sub>2</sub>), 50.9 (C<sub>5</sub>), 49.8\* (C<sub>5</sub>), 29.2 (C<sub>3</sub>), 28.6\* (C<sub>3</sub>), 23.9\* (C<sub>4</sub>), 22.2 (C<sub>4</sub>). <sup>19</sup>F NMR (282 MHz, DMSO-*d*<sub>6</sub>): δ -61.5 (CF<sub>3</sub>). IR (ATR) cm<sup>-1</sup>: 3308 (NH), 2928 (NH), 2231 (*p*-CN), 1600 (C=N), 1276 (C=S), 1128 (C-N). MS (EI) *m/z* (%): 271 (100), 252 (22), 213 (22), 202 (11), 163 (12), 83 (17). HRMS: Calculated for [C<sub>27</sub>H<sub>22</sub>N<sub>5</sub>SF<sub>6</sub>]<sup>+</sup>: 562.1500 [(M+H)<sup>+</sup>]; found: 562.1495. The ee was determined by HPLC using a Chiralpak IC column [*n*-hexane/*i*PrOH (90:10)]; flow rate 1.00 mL/min; τ<sub>major</sub> = 17.194 min, τ<sub>minor</sub> = 11.594 min (88% ee). [α]<sub>D</sub><sup>20</sup>: +47.0 (*c* = 1.0, CH<sub>2</sub>Cl<sub>2</sub>). M.p. (CH<sub>2</sub>Cl<sub>2</sub>): 97-99 °C.

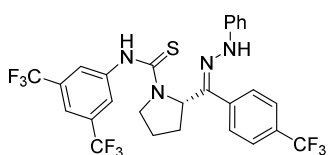

**(*S,E*)-*N*-[3,5-Bis(trifluoromethyl)phenyl]-2-((2-phenylhydrazono)[4-(trifluoromethyl)phenyl]methyl)pyrrolidine-1-carbothioamide (**4r**).**

Following *GP-F*, **4r** (32.7 mg, 0.054 mmol) was isolated by FC (petroleum ether/EtOAc gradient from 19:1 to 7:3) after 20h in 60% yield as a white solid starting from (*E*)-1-phenyl-2-(4-(trifluoromethyl)benzylidene)hydrazine **1l** (23.8 mg, 0.09 mmol) and *N*-(3,5-bis(trifluoromethyl)phenyl)-2,3-dihydro-1*H*-pyrrole-1-carbothioamide **2e** (45.9 mg, 0.135 mmol) in the presence of catalyst (*R*)-TRIP (6.8 mg, 0.009 mmol), MS (4Å, 27 mg) and using dry toluene (0.18 mL) as solvent. R<sub>f</sub>: 0.56 (hexanes/EtOAc 8:2). <sup>1</sup>H NMR (500 MHz, DMSO-*d*<sub>6</sub>, 100 °C): (*E:Z* ratio: 2.0:1, \*denotes *Z* diastereoisomer resonances) δ 9.33\* (s, 1H, NNH), 9.30 (s, 1H, CSNH + CSNH\*), 8.58 (s, 1H, NNH), 8.20 (s, 2H, C<sub>Ar</sub>-H), 7.89\* (s, 2H, C<sub>Ar</sub>-H), 7.86 (d, *J* = 8.0 Hz, 2H, C<sub>Ar</sub>-H), 7.75-7.68 (m, 2H, C<sub>Ar</sub>-H), 7.65 (s, 1H, C<sub>Ar</sub>-H), 7.63\* (s, 2H, C<sub>Ar</sub>-H), 7.26-7.17\* (m, 4H, C<sub>Ar</sub>-H), 7.17-7.03 (m, 4H, C<sub>Ar</sub>-H), 6.86-6.77\* (m, 1H, C<sub>Ar</sub>-H), 6.77-6.70 (m, 1H, C<sub>Ar</sub>-H), 5.76-5.68\* (m, 1H, C<sub>2</sub>-H), 5.51-5.44 (m, 1H, C<sub>2</sub>-H), 4.05-3.73 (m, 2H, C<sub>5</sub>-H), 2.75-2.59\* (m, 1H, C<sub>3</sub>-H<sub>a</sub>), 2.29-1.94 (m, 4H, C<sub>3</sub>-H + C<sub>4</sub>-H). <sup>13</sup>C NMR (125 MHz, DMSO-*d*<sub>6</sub>, 100 °C): δ 178.4\* (CS), 178.0 (CS), 145.2 (C<sub>Ar</sub>-C), 142.4\* (C<sub>Ar</sub>-C), 142.1 (CN), 141.3 (CN), 137.1 (C<sub>Ar</sub>-C), 129.6 (q, <sup>2</sup>*J*<sub>C-F</sub> = 32.9 Hz, CCF<sub>3</sub> + *p*-CCF<sub>3</sub>), 128.7 (C<sub>Ar</sub>-H), 128.3\* (C<sub>Ar</sub>-H), 128.0 (C<sub>Ar</sub>-H), 127.1\* (C<sub>Ar</sub>-H), 125.4 (q, <sup>3</sup>*J*<sub>C-F</sub> = 3.9 Hz, C<sub>Ar</sub>-H), 123.9\* (C<sub>Ar</sub>-H), 123.8 (C<sub>Ar</sub>-H), 123.6\* (C<sub>Ar</sub>-H), 123.7 (q, <sup>1</sup>*J*<sub>C-F</sub> = 272.2 Hz, CF<sub>3</sub>), 122.9 (q, <sup>1</sup>*J*<sub>C-F</sub> = 272.2 Hz, CF<sub>3</sub>), 121.7 (C<sub>Ar</sub>-C), 121.6\* (C<sub>Ar</sub>-C), 119.2\* (C<sub>Ar</sub>-H), 118.7 (C<sub>Ar</sub>-H), 115.9 (C<sub>Ar</sub>-H), 112.8\* (C<sub>Ar</sub>-H), 112.6 (C<sub>Ar</sub>-H), 65.2 (C<sub>2</sub>), 59.4\* (C<sub>2</sub>), 50.8\* (C<sub>5</sub>), 49.9 (C<sub>5</sub>), 29.2 (C<sub>3</sub>), 28.7\* (C<sub>3</sub>), 23.9\* (C<sub>4</sub>), 22.2 (C<sub>4</sub>). <sup>19</sup>F NMR (282 MHz, DMSO-*d*<sub>6</sub>): δ -61.2 (CF<sub>3</sub>), -61.6 (CF<sub>3</sub>). IR (ATR) cm<sup>-1</sup>: 3340 (NH), 2981 (NH), 1601 (C=N), 1276 (C=S), 1169 (C-F), 1124 (C-N). MS (EI) *m/z* (%): 271 (100), 252 (23), 213 (23), 202 (10), 163 (12), 83 (6). HRMS: Calculated for [C<sub>27</sub>H<sub>22</sub>N<sub>4</sub>SF<sub>9</sub>]<sup>+</sup>: 605.1421 [(M+H)<sup>+</sup>]; found: 605.1434. The ee was determined by HPLC using a Chiralpak IA column [*n*-hexane/*i*PrOH (90:10)]; flow rate 1.00 mL/min; τ<sub>major</sub> = 6.290 min, τ<sub>minor</sub> = 6.940 min (86% ee). [α]<sub>D</sub><sup>20</sup>: +125.9 (*c* = 1.0, CH<sub>2</sub>Cl<sub>2</sub>). M.p. (CH<sub>2</sub>Cl<sub>2</sub>): 81-83 °C.

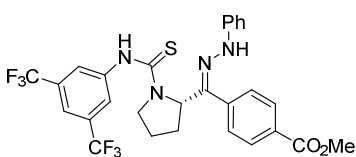

**(*S*)-Methyl-(*E*)-4-{{1-[(3,5-bis(trifluoromethyl)phenyl)carbamothioyl]pyrrolidin-2-yl}(2-phenylhydrazono)methyl}benzoate (**4s**).**

Following *GP-F*, **4s** (34.7 mg, 0.058 mmol) was isolated by FC (petroleum ether/EtOAc gradient from 19:1 to 7:3) after 20h in 65% yield as a light yellow solid starting from methyl (*E*)-4-((2-phenylhydrazono)methyl)benzoate **1m** (22.9 mg, 0.09 mmol) and *N*-(3,5-bis(trifluoromethyl)phenyl)-2,3-dihydro-1*H*-pyrrole-1-carbothioamide **2e** (45.9 mg, 0.135 mmol) in the presence of catalyst (*R*)-TRIP (6.8 mg, 0.009 mmol), MS (4Å, 27 mg) and using dry toluene (0.18 mL) as solvent. R<sub>f</sub>: 0.45 (hexanes/EtOAc 8:2). <sup>1</sup>H NMR (500 MHz, DMSO-*d*<sub>6</sub>, 100 °C): (*E:Z* ratio: 2.1:1, \*denotes minor *Z* resonances, # overlapped signals) δ 9.32\* (s, 1H, NNH), 9.30 (bs, 1H, CSNH), 8.48 (s, 1H, NNH), 8.19 (s, 2H, C<sub>Ar</sub>-H), 8.08 (d, *J* = 8.0 Hz, 2H, C<sub>Ar</sub>-H), 7.90 (d, *J* = 8.3 Hz, 1H, C<sub>Ar</sub>-H), 7.66-7.56 (m, 2H, C<sub>Ar</sub>-H), 7.25-7.18\* (m, 4H, C<sub>Ar</sub>-H), 7.16-7.03 (m, 4H, C<sub>Ar</sub>-H), 6.85-6.78\* (m, 1H, C<sub>Ar</sub>-H), 6.75-6.71 (m, 1H, C<sub>Ar</sub>-H), 5.75-5.68\* (m, 1H, C<sub>2</sub>-H), 5.49 (dd, *J* = 7.8, 2.0 Hz, 1H, C<sub>2</sub>-H), 4.05-3.82# (m, 5H, C<sub>5</sub>-H + OCH<sub>3</sub>), 2.71-2.59\* (m, 1H, C<sub>3</sub>-H<sub>a</sub>), 2.26-1.97 (m, 4H, C<sub>3</sub>-H + C<sub>4</sub>-H). <sup>13</sup>C NMR (125 MHz, DMSO-*d*<sub>6</sub>, 100 °C): δ 178.3\* (CS), 178.0 (CS), 165.6\* (COO), 165.5 (COO), 145.2\* (C<sub>Ar</sub>-C), 145.1 (C<sub>Ar</sub>-C), 142.4 (CN), 137.5 (C<sub>Ar</sub>-C), 129.8 (C<sub>Ar</sub>-C), 129.6 (q, <sup>2</sup>*J*<sub>C-F</sub> = 33.0 Hz, CCF<sub>3</sub>), 129.4 (C<sub>Ar</sub>-H), 128.3\* (C<sub>Ar</sub>-H), 128.1 (C<sub>Ar</sub>-H), 128.1\* (C<sub>Ar</sub>-H), 128.0 (C<sub>Ar</sub>-H), 126.5\* (C<sub>Ar</sub>-H), 123.8 (q, <sup>3</sup>*J*<sub>C-F</sub> = 3.3 Hz, C<sub>Ar</sub>-H), 123.5\* (C<sub>Ar</sub>-H), 122.8 (q, <sup>1</sup>*J*<sub>C-F</sub> = 273.1 Hz, CF<sub>3</sub>), 119.2\* (C<sub>Ar</sub>-H), 118.7 (C<sub>Ar</sub>-H), 115.9 (q, <sup>3</sup>*J*<sub>C-F</sub> = 2.9 Hz, C<sub>Ar</sub>-H), 112.8\* (C<sub>Ar</sub>-H), 112.5 (C<sub>Ar</sub>-H), 65.0 (C<sub>2</sub>), 59.5\* (C<sub>2</sub>), 51.5 (OCH<sub>3</sub>), 51.2\* (OCH<sub>3</sub>), 50.9\* (C<sub>5</sub>), 50.0 (C<sub>5</sub>), 29.2 (C<sub>3</sub>), 28.7\* (C<sub>3</sub>), 23.9\* (C<sub>4</sub>), 22.2 (C<sub>4</sub>). <sup>19</sup>F NMR (300 MHz, DMSO-*d*<sub>6</sub>): δ -61.6 (CF<sub>3</sub>). IR (ATR) cm<sup>-1</sup>: 3308 (NH), 2959 (NH), 1717 (C=O), 1601 (C=N), 1275 (C=S), 1129 (C-N). MS (EI) *m/z* (%): 271 (100), 252 (23), 213 (24), 202 (11), 163 (13), 83 (25). HRMS: Calculated for [C<sub>28</sub>H<sub>25</sub>N<sub>4</sub>O<sub>2</sub>SF<sub>9</sub>]<sup>+</sup>: 595.1602 [(M+H)<sup>+</sup>]; found: 595.1607. The ee was determined by HPLC using a Chiralpak IC column [*n*-hexane/*i*PrOH (90:10)]; flow rate 1.00 mL/min; τ<sub>major</sub> = 10.350 min, τ<sub>minor</sub> = 12.245 min (83% ee). [α]<sub>D</sub><sup>20</sup>: +102.4 (*c* = 1.0, CH<sub>2</sub>Cl<sub>2</sub>). M.p. (CH<sub>2</sub>Cl<sub>2</sub>): 77-79 °C.

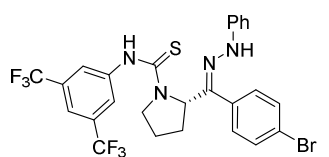

**(*S,E*)-*N*-[3,5-Bis(trifluoromethyl)phenyl]-2-[(4-bromophenyl)(2-phenylhydrazono)methyl]pyrrolidine-1-carbothioamide (**4t**).**

Following *GP-F*, **4t** (43.9 mg, 0.071 mmol) was isolated by FC (petroleum ether/EtOAc gradient from 19:1 to 7:3) after 20h in 79% yield as a light yellow solid starting from (*E*)-1-(4-bromobenzylidene)-2-phenylhydrazine **1n** (24.8 mg, 0.09 mmol) and *N*-(3,5-bis(trifluoromethyl)phenyl)-2,3-dihydro-1*H*-pyrrole-1-carbothioamide **2e** (45.9 mg, 0.135 mmol) in the presence of catalyst (*R*)-TRIP (6.8 mg, 0.009 mmol), MS (4Å, 27 mg) and using dry toluene (0.18 mL)

as solvent. R<sub>f</sub>: 0.58 (hexanes/EtOAc 7:3). <sup>1</sup>H NMR (500 MHz, DMSO-*d*<sub>6</sub>, 100 °C): (*E*:*Z* ratio: 3.2:1, \*denotes *Z* diastereoisomer resonances) δ 9.32\* (s, 1H, CSNH), 9.28 (s, 1H, CSNH), 9.18\* (s, 1H, NNH), 8.47 (s, 1H, NNH), 8.20 (s, 2H, C<sub>Ar</sub>-H), 7.96\* (s, 2H, C<sub>Ar</sub>-H), 7.71 (d, *J* = 8.4 Hz, 2H, C<sub>Ar</sub>-H), 7.65 (s, 1H, C<sub>Ar</sub>-H), 7.52-7.47\* (m, 2H, C<sub>Ar</sub>-H), 7.47-7.40 (m, 2H, C<sub>Ar</sub>-H), 7.25-7.17\* (m, 4H, C<sub>Ar</sub>-H), 7.16-7.05 (m, 4H, C<sub>Ar</sub>-H), 6.82-6.77\* (m, 1H, C<sub>Ar</sub>-H), 6.75-6.69 (m, 1H, C<sub>Ar</sub>-H), 5.74-5.66\* (m, 1H, C<sub>2</sub>-H), 5.47-5.40 (m, 1H, C<sub>2</sub>-H), 4.01-3.76 (m, 2H, C<sub>5</sub>-H), 2.66-2.56\* (C<sub>3</sub>-H<sub>a</sub>), 2.27-1.93 (m, 4H, C<sub>3</sub>-H + C<sub>4</sub>-H). <sup>13</sup>C NMR (125 MHz, DMSO-*d*<sub>6</sub>, 100 °C): δ 178.3\* (CS), 178.0 (CS), 145.4\* (CN), 145.2 (CN), 142.4 (C<sub>Ar</sub>-C), 142.1\* (C<sub>Ar</sub>-C), 136.6 (C<sub>Ar</sub>-C), 131.8 (C<sub>Ar</sub>-C), 131.7 (C<sub>Ar</sub>-H), 130.1\* (C<sub>Ar</sub>-H), 129.9 (C<sub>Ar</sub>-H), 129.4 (q, <sup>2</sup>*J*<sub>C-F</sub> = 33.6 Hz, CCF<sub>3</sub>), 128.6\* (C<sub>Ar</sub>-H), 128.3\* (C<sub>Ar</sub>-H), 128.0 (C<sub>Ar</sub>-H), 123.8 (C<sub>Ar</sub>-H), 123.6\* (C<sub>Ar</sub>-H), 123.0 (q, <sup>1</sup>*J*<sub>C-F</sub> = 272.3 Hz, CF<sub>3</sub>), 123.8 (C<sub>Ar</sub>-H), 121.7 (C<sub>Ar</sub>-C), 119.0\* (C<sub>Ar</sub>-H), 118.6 (C<sub>Ar</sub>-H), 115.9 (q, <sup>3</sup>*J*<sub>C-F</sub> = 4.3 Hz, C<sub>Ar</sub>-H), 112.7\* (C<sub>Ar</sub>-H), 112.5 (C<sub>Ar</sub>-H), 65.3 (C<sub>2</sub>), 59.5\* (C<sub>2</sub>), 49.9 (C<sub>5</sub>), 29.2 (C<sub>3</sub>), 28.7\* (C<sub>3</sub>), 23.9\* (C<sub>4</sub>), 22.1 (C<sub>4</sub>). <sup>19</sup>F NMR (282 MHz, DMSO-*d*<sub>6</sub>): δ -61.5 (CF<sub>3</sub>). IR (ATR) cm<sup>-1</sup>: 3341 (NH), 2971 (NH), 2930 (C-H), 1591 (C=N), 1276 (C=S), 1129 (C-N). MS (EI) *m/z* (%): 271 (100), 252 (27), 213 (24), 202 (10), 163 (13), 83 (25), 69 (9). HRMS: Calculated for [C<sub>26</sub>H<sub>22</sub>N<sub>4</sub>SF<sub>6</sub>Br]<sup>+</sup>: 615.0653 [(M+H)<sup>+</sup>]; found: 615.0647. The ee was determined by HPLC using a Chiralpak IC column [*n*-hexane/*i*PrOH (92:08)]; flow rate 1.00 mL/min; τ<sub>major</sub> = 4.597 min, τ<sub>minor</sub> = 4.956 min (92% ee). [α]<sub>D</sub><sup>20</sup>: +114.7 (*c* = 1.0, CH<sub>2</sub>Cl<sub>2</sub>). M.p. (CH<sub>2</sub>Cl<sub>2</sub>): 88-90 °C.

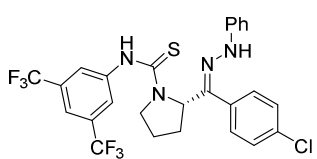

**(*S,E*)-*N*-[3,5-Bis(trifluoromethyl)phenyl]-2-[(4-chlorophenyl)(2-**

**phenylhydrazono)methyl]pyrrolidine-1-carbothioamide (4u).** Following *GP-F*, **4u** (42.3 mg, 0.074 mmol) was isolated by FC (petroleum ether/EtOAc gradient from 19:1 to 7:3) after 20h in 82% yield as a yellow solid starting from

(*E*)-1-(4-chlorobenzylidene)-2-phenylhydrazine **1o** (20.8 mg, 0.09 mmol) and *N*-(3,5-bis(trifluoromethyl)phenyl)-2,3-dihydro-1*H*-pyrrole-1-carbothioamide **2e** (45.9 mg, 0.135 mmol) in the presence of catalyst (*R*)-TRIP (6.8 mg, 0.009 mmol), MS (4Å, 27 mg) and using dry toluene (0.18 mL) as solvent. R<sub>f</sub>: 0.55 (hexanes/EtOAc 8:2). <sup>1</sup>H NMR (500 MHz, DMSO-*d*<sub>6</sub>, 100 °C): (*E*:*Z* ratio: 3:1, \*denotes *Z* diastereoisomer resonances) δ 9.32\* (s, 1H, CSNH), 9.29 (s, 1H, CSNH), 9.17\* (s, 1H, NNH), 8.46 (s, 1H, NNH), 8.20 (s, 2H, C<sub>Ar</sub>-H), 7.96\* (s, 2H, C<sub>Ar</sub>-H), 7.65 (s, 1H, C<sub>Ar</sub>-H), 7.57 (d, *J* = 8.5 Hz, 2H, C<sub>Ar</sub>-H), 7.52-7.47 (m, 2H, C<sub>Ar</sub>-H), 7.34\* (d, *J* = 8.5 Hz, 2H, C<sub>Ar</sub>-H), 7.25-7.16 (m, 1H, C<sub>Ar</sub>-H), 7.15-7.02 (m, 3H, C<sub>Ar</sub>-H), 6.82-6.77\* (m, 1H, C<sub>Ar</sub>-H), 6.75-6.70 (m, 1H, C<sub>Ar</sub>-H), 5.74-5.69\* (m, 1H, C<sub>2</sub>-H), 5.47-5.39 (m, 1H, C<sub>2</sub>-H), 4.02-3.74 (m, 2H, C<sub>5</sub>-H), 2.65-2.57\* (C<sub>3</sub>-H<sub>a</sub>), 2.28-1.94 (m, 4H, C<sub>3</sub>-H + C<sub>4</sub>-H). <sup>13</sup>C NMR (125 MHz, DMSO-*d*<sub>6</sub>, 100 °C): δ 178.3\* (CS), 178.0 (CS), 145.4\* (C<sub>Ar</sub>-C), 145.2 (C<sub>Ar</sub>-C), 142.4 (CN), 142.2\* (CN), 136.2 (C<sub>Ar</sub>-C), 133.4 (C<sub>Ar</sub>-C), 131.4 (C<sub>Ar</sub>-C), 129.6 (C<sub>Ar</sub>-H), 129.4 (q, <sup>2</sup>*J*<sub>C-F</sub> = 33.0 Hz, CCF<sub>3</sub>), 128.7 (C<sub>Ar</sub>-H), 128.3\* (C<sub>Ar</sub>-H), 128.0 (C<sub>Ar</sub>-H), 127.2\* (C<sub>Ar</sub>-H), 123.8 (C<sub>Ar</sub>-H), 123.5\* (C<sub>Ar</sub>-H), 122.8 (q, <sup>1</sup>*J*<sub>C-F</sub> = 272.9 Hz, CF<sub>3</sub>), 119.0\* (C<sub>Ar</sub>-H), 118.6 (C<sub>Ar</sub>-H), 115.9 (q, <sup>3</sup>*J*<sub>C-F</sub> = 3.3 Hz, C<sub>Ar</sub>-H), 112.7\* (C<sub>Ar</sub>-H), 112.5 (C<sub>Ar</sub>-H), 65.3 (C<sub>2</sub>), 59.5\* (C<sub>2</sub>), 50.7\* (C<sub>5</sub>), 50.0 (C<sub>5</sub>), 29.2 (C<sub>3</sub>), 28.7\* (C<sub>3</sub>), 23.9\* (C<sub>4</sub>), 22.1 (C<sub>4</sub>). <sup>19</sup>F NMR (282 MHz, DMSO-*d*<sub>6</sub>): δ -61.5 (CF<sub>3</sub>). IR (ATR) cm<sup>-1</sup>: 2984 (NH), 1601 (C=N), 1278 (C=S), 1134 (C-N). MS (EI) *m/z* (%): 271 (100), 252 (24), 213 (23), 202 (11), 163 (14), 143 (9), 83 (34), 69 (9). HRMS: Calculated for [C<sub>26</sub>H<sub>22</sub>N<sub>4</sub>SF<sub>6</sub>Cl]<sup>+</sup>: 571.1158 [(M+H)<sup>+</sup>]; found: 571.1157. The ee was determined by HPLC using a Chiralcel OD-3 column [*n*-hexane/*i*PrOH (95:05)]; flow rate 1.00 mL/min; τ<sub>major</sub> = 9.354 min, τ<sub>minor</sub> = 11.676 min (90% ee). [α]<sub>D</sub><sup>20</sup>: +145.3 (*c* = 1.0, CH<sub>2</sub>Cl<sub>2</sub>). M.p. (CH<sub>2</sub>Cl<sub>2</sub>): 81-83 °C.

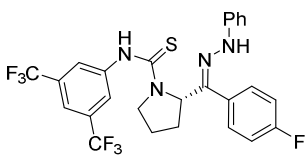

**(*S,E*)-*N*-[3,5-Bis(trifluoromethyl)phenyl]-2-[(4-fluorophenyl)(2-**

**phenylhydrazono)methyl]pyrrolidine-1-carbothioamide (4v).** Following *GP-F*, **4v** (47.8 mg, 0.086 mmol) was isolated by FC (petroleum ether/EtOAc gradient from 19:1 to 7:3) after 20h in 95% yield as a white solid starting from

(*E*)-1-(4-fluorobenzylidene)-2-phenylhydrazine **1p** (19.3 mg, 0.09 mmol) and *N*-(3,5-bis(trifluoromethyl)phenyl)-2,3-dihydro-1*H*-pyrrole-1-carbothioamide **2e** (45.9 mg, 0.135 mmol) in the presence of catalyst (*R*)-TRIP (6.8 mg, 0.009 mmol), MS (4Å, 27 mg) and using dry toluene (0.18 mL) as solvent. R<sub>f</sub>: 0.52 (hexanes/EtOAc 7:3). <sup>1</sup>H NMR (500 MHz, DMSO-*d*<sub>6</sub>, 100 °C): (*E*:*Z* ratio: 3.7:1, \*denotes *Z* diastereoisomer resonances) δ 9.30\* (s, 1H, CSNH\*), 9.28 (s, 1H, CSNH), 9.12\* (s, 1H, NNH), 8.37 (s, 1H, NNH), 8.20 (s, 2H, C<sub>Ar</sub>-H), 7.95\* (s, 2H, C<sub>Ar</sub>-H), 7.65 (s, 1H, C<sub>Ar</sub>-H), 7.57-7.48 (m, 2H, C<sub>Ar</sub>-H), 7.36-7.29 (m, 2H, C<sub>Ar</sub>-H), 7.25-7.15 (m, 1H, C<sub>Ar</sub>-H), 7.15-7.02 (m, 3H, C<sub>Ar</sub>-H), 6.81-6.76\* (m, 1H, C<sub>Ar</sub>-H), 6.75-6.69 (m, 1H, C<sub>Ar</sub>-H), 5.75-5.68\* (m, 1H, C<sub>2</sub>-H), 5.47-5.40 (m, 1H, C<sub>2</sub>-H), 4.01-3.72 (m, 2H, C<sub>5</sub>-H), 2.67-2.57\* (C<sub>3</sub>-H), 2.26-1.95 (m, 4H, C<sub>3</sub>-H + C<sub>4</sub>-H). <sup>13</sup>C NMR (125 MHz, DMSO-*d*<sub>6</sub>, 100 °C): δ 178.2\* (CS), 178.0 (CS), 161.9 (d, <sup>1</sup>*J*<sub>C-F</sub> = 246.4 Hz, CF), 145.5\* (C<sub>Ar</sub>-C), 145.2 (C<sub>Ar</sub>-C), 142.4 (CN), 142.2\* (CN), 130.0 (d, <sup>3</sup>*J*<sub>C-F</sub> = 8.4 Hz, C<sub>Ar</sub>-H), 129.4 (q, <sup>2</sup>*J*<sub>C-F</sub> = 32.8 Hz, CCF<sub>3</sub>), 128.6 (C<sub>Ar</sub>-C), 128.2\* (C<sub>Ar</sub>-H), 128.0 (C<sub>Ar</sub>-H), 123.8 (C<sub>Ar</sub>-H), 123.5\* (C<sub>Ar</sub>-H), 122.8 (q, <sup>1</sup>*J*<sub>C-F</sub> = 272.6 Hz, CF<sub>3</sub>), 118.8\* (C<sub>Ar</sub>-H), 118.6 (C<sub>Ar</sub>-H), 115.9 (C<sub>Ar</sub>-H),

115.6 (d,  $^2J_{C-F} = 21.6$  Hz,  $C_{Ar-H}$ ), 113.9\* (d,  $^2J_{C-F} = 21.2$  Hz,  $C_{Ar-H}$ ), 112.7\* ( $C_{Ar-H}$ ), 112.5 ( $C_{Ar-H}$ ), 65.3 ( $C_2$ ), 59.5\* ( $C_2$ ), 50.7\* ( $C_5$ ), 49.9 ( $C_5$ ), 29.1 ( $C_3$ ), 28.7\* ( $C_3$ ), 22.1 ( $C_4$ ).  $^{19}F$  NMR (282 MHz, DMSO- $d_6$ ):  $\delta$  -61.5 ( $CF_3$ ), -112.4 (CF). IR (ATR)  $cm^{-1}$ : 2930 (NH), 1600 (C=N), 1276 (C=S), 1172 (C-F), 1128 (C-N). MS (EI)  $m/z$  (%): 271 (100), 252 (24), 213 (22), 202 (10), 163 (11), 83 (33). HRMS: Calculated for  $[C_{26}H_{22}N_4SF_7]^+$ : 555.1453 [(M+H) $^+$ ]; found: 555.1453. The ee was determined by HPLC using a Chiralpak IC column [*n*-hexane/*i*PrOH (92:08)]; flow rate 1.00 mL/min;  $\tau_{major} = 4.716$  min,  $\tau_{minor} = 5.079$  min (94% ee).  $[\alpha]_D^{20}$ : +169.4 ( $c = 1.0$ ,  $CH_2Cl_2$ ). M.p. ( $CH_2Cl_2$ ): 77-79 °C.

**The reaction was carried out in a one-pot procedure starting from phenylhydrazine and *p*-fluorobenzaldehyde:**

Phenylhydrazine (8.9  $\mu$ L, 0.09 mmol) and *p*-fluorobenzaldehyde (9.9  $\mu$ L, 0.09 mmol) were heated in dry toluene (0.18 mL) at 55°C for 3h. After cooling the reaction to -5°C, *N*-[3,5-bis(trifluoromethyl)phenyl]-2,3-dihydro-1*H*-pyrrole-1-carbothioamide **2e** (45.9 mg, 0.135 mmol) was added to the mixture together with catalyst **3a** (6.8 mg, 0.009 mmol) and 4Å MS and the mixture was allowed to stir at this temperature for 20h. The crude reaction mixture was directly charged onto silica gel and subjected to flash chromatography (petroleum ether/EtOAc gradient from 19:1 to 7:3) to afford **4v** (45.5 mg, 0.082 mmol, 91%, 94% ee) as a white solid.

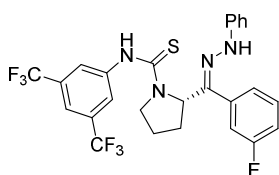

**(*S,E*)-*N*-[3,5-Bis(trifluoromethyl)phenyl]-2-[(3-fluorophenyl)(2-phenylhydrazono)methyl]pyrrolidine-1-carbothioamide (**4w**).** Following *GP-F*, **4w** (39.8 mg, 0.072 mmol) was isolated by FC (petroleum ether/EtOAc gradient from 19:1 to 7:3) after 20h in 80% yield as a light yellow solid starting from (*E*)-1-(3-fluorobenzylidene)-2-phenylhydrazine **1q** (19.3 mg, 0.09 mmol) and *N*-(3,5-bis(trifluoromethyl)phenyl)-2,3-dihydro-1*H*-pyrrole-1-carbothioamide

**2e** (45.9 mg, 0.135 mmol) in the presence of catalyst (*R*)-TRIP (6.8 mg, 0.009 mmol), MS (4Å, 27 mg) and using dry toluene (0.18 mL) as solvent. R<sub>f</sub>: 0.58 (hexanes/EtOAc 8:2).  $^1H$  NMR (500 MHz, DMSO- $d_6$ , 100 °C): (*E:Z* ratio: 2.7:1, \*denotes *Z* diastereoisomer resonances)  $\delta$  9.36\* (s, 1H, CSNH), 9.29 (s, 1H, CSNH), 9.20\* (s, 1H, NNH), 8.47 (s, 1H, NNH), 8.19 (s, 2H,  $C_{Ar-H}$ ), 7.96\* (s, 2H,  $C_{Ar-H}$ ), 7.65 (s, 1H,  $C_{Ar-H}$ ), 7.61-7.51 (m, 1H,  $C_{Ar-H}$ ), 7.39-7.15 (m, 3H,  $C_{Ar-H}$ ), 7.15-7.04 (m, 4H,  $C_{Ar-H}$ ), 6.84-6.77\* (m, 1H,  $C_{Ar-H}$ ), 6.77-6.69 (m, 1H,  $C_{Ar-H}$ ), 5.75-5.68\* (m, 1H,  $C_2-H$ ), 5.48-5.41 (m, 1H,  $C_2-H$ ), 4.02-3.73 (m, 2H,  $C_5-H$ ), 2.66-2.55\* (m, 1H,  $C_3-H_a$ ), 2.27-1.96 (m, 4H,  $C_3-H + C_4-H$ ).  $^{13}C$  NMR (125 MHz, DMSO- $d_6$ , 100 °C):  $\delta$  178.3\* (CS), 178.0 (CS), 162.1 (d,  $^1J_{C-F} = 245.6$  Hz, CF), 145.3\* ( $C_{Ar-C}$ ), 145.2 ( $C_{Ar-C}$ ), 142.4 (CN), 142.2\* (CN), 134.8 ( $C_{Ar-C}$ ), 130.7 (d,  $^3J_{C-F} = 8.5$  Hz,  $C_{Ar-H}$ ), 129.4 (q,  $^2J_{C-F} = 33.2$  Hz,  $CCF_3$ ), 128.3\* ( $C_{Ar-H}$ ), 128.0 ( $C_{Ar-H}$ ), 123.8 ( $C_{Ar-H}$ ), 123.6\* ( $C_{Ar-H}$ ), 122.5 (d,  $^4J_{C-F} = 2.5$  Hz,  $C_{Ar-H}$ ), 122.9 (q,  $^1J_{C-F} = 272.7$  Hz,  $CF_3$ ), 119.6 (d,  $^3J_{C-F} = 5.5$  Hz,  $C_{Ar-C}$ ), 119.1\* ( $C_{Ar-H}$ ), 118.7 ( $C_{Ar-H}$ ), 116.0\* ( $C_{Ar-H}$ ), 115.9 ( $C_{Ar-H}$ ), 115.4 (d,  $^2J_{C-F} = 20.9$  Hz,  $C_{Ar-H}$ ), 114.7 (d,  $^2J_{C-F} = 22.0$  Hz,  $C_{Ar-H}$ ), 113.5\* (d,  $^2J_{C-F} = 21.1$  Hz,  $C_{Ar-H}$ ), 113.2\* (d,  $^2J_{C-F} = 22.4$  Hz,  $C_{Ar-H}$ ), 112.8\* ( $C_{Ar-H}$ ), 112.5 ( $C_{Ar-H}$ ), 65.2 ( $C_2$ ), 59.5\* ( $C_2$ ), 50.7\* ( $C_5$ ), 49.9 ( $C_5$ ), 29.2 ( $C_3$ ), 28.7\* ( $C_3$ ), 23.8\* ( $C_4$ ), 22.1 ( $C_4$ ).  $^{19}F$  NMR (282 MHz, DMSO- $d_6$ ):  $\delta$  -61.5 ( $CF_3$ ), -112.0 (CF). IR (ATR)  $cm^{-1}$ : 3335 (NH), 2974 (NH), 1601 (C=N), 1275 (C=S), 1170 (C-F), 1126 (C-N). MS (EI)  $m/z$  (%): 271 (100), 252 (23), 213 (23), 202 (10), 163 (13), 83 (7); HRMS: Calculated for  $[C_{26}H_{22}N_4SF_7]^+$ : 555.1453 [(M+H) $^+$ ]; found: 555.1459. The ee was determined by HPLC using a Chiralpak AD-H column [*n*-hexane/*i*PrOH (90:10)]; flow rate 1.00 mL/min;  $\tau_{major} = 20.990$  min,  $\tau_{minor} = 6.946$  min (84% ee).  $[\alpha]_D^{20}$ : +124.6 ( $c = 1.0$ ,  $CH_2Cl_2$ ). M.p. ( $CH_2Cl_2$ ): 73-75 °C.

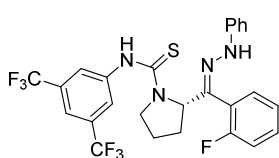

**(*S,E*)-*N*-[3,5-Bis(trifluoromethyl)phenyl]-2-[(2-fluorophenyl)(2-phenylhydrazono)methyl]pyrrolidine-1-carbothioamide (**4x**).** Following *GP-F*, **4x** (47.2 mg, 0.085 mmol) was isolated by FC (petroleum ether/EtOAc gradient from 19:1 to 7:3) after 20h in 94% yield as a yellow solid starting from (*E*)-1-(2-fluorobenzylidene)-2-phenylhydrazine **1r** (19.3 mg, 0.09 mmol) and *N*-(3,5-bis(trifluoromethyl)phenyl)-2,3-dihydro-1*H*-pyrrole-1-carbothioamide **2e** (45.9 mg, 0.135 mmol) in the presence of catalyst (*R*)-TRIP (6.8 mg, 0.009 mmol), MS (4Å, 27 mg) and using dry toluene (0.18 mL) as solvent. R<sub>f</sub>: 0.54 (hexanes/EtOAc 8:2).  $^1H$  NMR (500 MHz, DMSO- $d_6$ , 100 °C): (*E:Z* ratio: 9.1:1, \*denotes *Z* diastereoisomer resonances)  $\delta$  9.28 (s, 1H, CSNH), 8.48 (s, 1H, NNH), 8.20 (s, 2H,  $C_{Ar-H}$ ), 8.01\* (s, 1H, CSNH), 7.64 (s, 1H,  $C_{Ar-H}$ ), 7.59-7.47 (m, 2H,  $C_{Ar-H}$ ), 7.35 (t,  $J = 7.5$  Hz, 1H,  $C_{Ar-H}$ ), 7.30 (t,  $J = 9.0$  Hz, 1H,  $C_{Ar-H}$ ), 7.17-7.05 (m, 4H,  $C_{Ar-H}$ ), 6.80-6.76\* (m, 1H,  $C_{Ar-H}$ ), 6.76-6.71 (m, 1H,  $C_{Ar-H}$ ), 5.88-5.77\* (m, 1H,  $C_2-H$ ), 5.52-5.45 (m, 1H,  $C_2-H$ ), 3.99-3.77 (m, 2H,  $C_5-H$ ), 3.58-3.51\* (m, 1H,  $C_5-H_a$ ), 3.42-3.35\* (m, 1H,  $C_5-H_b$ ), 2.67-2.59\* (m, 1H,  $C_3-H_a$ ), 2.24-1.91 (m, 4H,  $C_3-H + C_4-H$ ).  $^{13}C$  NMR (125 MHz, DMSO- $d_6$ ,

100 °C):  $\delta$  178.3\* (CS), 178.1 (CS), 158.7 (d,  $^1J_{C-F}$  = 246.6 Hz, CF), 145.0 (C<sub>Ar</sub>-C), 142.4 (CN), 137.3 (C<sub>Ar</sub>-C), 130.9 (d,  $^3J_{C-F}$  = 8.1 Hz, C<sub>Ar</sub>-H), 129.8 (d,  $^3J_{C-F}$  = 4.3 Hz, C<sub>Ar</sub>-H), 129.4 (q,  $^2J_{C-F}$  = 33.1 Hz, CCF<sub>3</sub>), 128.2\* (C<sub>Ar</sub>-H), 128.1 (C<sub>Ar</sub>-H), 124.6 (d,  $^4J_{C-F}$  = 2.5 Hz, C<sub>Ar</sub>-H), 123.6 (C<sub>Ar</sub>-H), 122.8 (q,  $^1J_{C-F}$  = 272.3 Hz, CF<sub>3</sub>), 119.9 (d,  $^2J_{C-F}$  = 19.3 Hz, C<sub>Ar</sub>-C), 119.0\* (C<sub>Ar</sub>-H), 118.7 (C<sub>Ar</sub>-H), 115.8 (C<sub>Ar</sub>-H), 115.7 (d,  $^2J_{C-F}$  = 22.1 Hz, C<sub>Ar</sub>-H), 112.7\* (C<sub>Ar</sub>-H), 112.5 (C<sub>Ar</sub>-H), 65.1 (C<sub>2</sub>), 50.0 (C<sub>5</sub>), 28.9 (C<sub>3</sub>), 22.0 (C<sub>4</sub>). <sup>19</sup>F NMR (282 MHz, DMSO-*d*<sub>6</sub>):  $\delta$  -61.5 (CF<sub>3</sub>), -112.2 (CF). IR (ATR) cm<sup>-1</sup>: 3331 (NH), 2963 (NH), 1601 (C=N), 1276 (C=S), 1172 (C-F), 1128 (C-N). MS (EI) *m/z* (%): 271 (100), 252 (23), 213 (23), 202 (10), 163 (12), 83 (8). HRMS: Calculated for [C<sub>26</sub>H<sub>22</sub>N<sub>4</sub>SF<sub>7</sub>]<sup>+</sup>: 555.1453 [(M+H)<sup>+</sup>]; found: 555.1467. The ee was determined by HPLC using a Chiralpak AD-H column [*n*-hexane/*i*PrOH (90:10)]; flow rate 1.00 mL/min;  $\tau_{\text{major}}$  = 11.820 min,  $\tau_{\text{minor}}$  = 7.849 min (82% ee).  $[\alpha]_{\text{D}}^{20}$ : +100.7 (*c* = 1.0, CH<sub>2</sub>Cl<sub>2</sub>). M.p. (CH<sub>2</sub>Cl<sub>2</sub>): 73-75 °C.

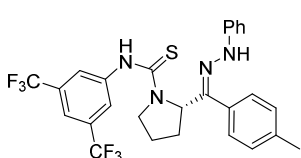

**(*S,E*)-*N*-[3,5-Bis(trifluoromethyl)phenyl]-2-[(2-phenylhydrazono)(*p*-tolyl)methyl]pyrrolidine-1-carbothioamide (**4y**).** Following *GP-F*, **4y** (41.2 mg, 0.075 mmol) was isolated by FC (petroleum ether/EtOAc gradient from 19:1 to 7:3) after 20h in 83% yield as a yellow solid starting from (*E*)-1-(4-methylbenzylidene)-2-phenylhydrazine **1s** (18.9 mg, 0.09 mmol) and *N*-(3,5-bis(trifluoromethyl)phenyl)-2,3-dihydro-1*H*-pyrrole-1-carbothioamide **2e** (45.9 mg, 0.135 mmol) in the presence of catalyst (*R*)-TRIP (6.8 mg, 0.009 mmol), MS (4Å, 27 mg) and using dry toluene (0.18 mL) as solvent. R<sub>f</sub>: 0.70 (hexanes/EtOAc 8:2). <sup>1</sup>H NMR (500 MHz, DMSO-*d*<sub>6</sub>, 100 °C): (*E:Z* ratio: 5.2:1, \*denotes *Z* diastereoisomer resonances)  $\delta$  9.27 (s, 1H, CSNH), 9.06\* (s, 1H, NNH), 8.24 (s, 1H, NNH), 8.20 (s, 2H, C<sub>Ar</sub>-H), 7.93\* (s, 2H, C<sub>Ar</sub>-H), 7.64 (s, 1H, C<sub>Ar</sub>-H), 7.40-7.29 (m, 4H, C<sub>Ar</sub>-H), 7.23-7.14\* (m, 4H, C<sub>Ar</sub>-H), 7.14-7.01 (m, 4H, C<sub>Ar</sub>-H), 6.81-6.75\* (m, 1H, C<sub>Ar</sub>-H), 6.74-6.68 (m, 1H, C<sub>Ar</sub>-H), 5.75-5.68\* (m, 1H, C<sub>2</sub>-H), 5.50-5.42 (m, 1H, C<sub>2</sub>-H), 3.98-3.79 (m, 2H, C<sub>5</sub>-H), 2.64-2.55\* (m, 1H, C<sub>3</sub>-H<sub>a</sub>), 2.39 (s, 3H, CH<sub>3</sub>), 2.32\* (s, 3H, CH<sub>3</sub>), 2.23-2.12 (m, 1H, C<sub>3</sub>-H<sub>a</sub>), 2.11-1.95 (m, 3H, C<sub>3</sub>-H<sub>b</sub> + C<sub>4</sub>-H). <sup>13</sup>C NMR (125 MHz, DMSO-*d*<sub>6</sub>, 100 °C):  $\delta$  178.2\* (CS), 178.0 (CS), 145.7\* (C<sub>Ar</sub>-C), 145.2 (C<sub>Ar</sub>-C), 143.8 (C<sub>Ar</sub>-C), 142.5 (CN), 142.2\* (CN), 138.0 (C<sub>Ar</sub>-C), 136.2 (C<sub>Ar</sub>-C), 129.3 (q,  $^2J_{C-F}$  = 33.2 Hz, CCF<sub>3</sub>), 129.3 (C<sub>Ar</sub>-H), 128.2\* (C<sub>Ar</sub>-H), 128.0 (C<sub>Ar</sub>-H), 127.8\* (C<sub>Ar</sub>-H), 127.4 (C<sub>Ar</sub>-H), 126.5\* (C<sub>Ar</sub>-H), 123.6 (C<sub>Ar</sub>-H), 123.6\* (C<sub>Ar</sub>-H), 122.8 (q,  $^1J_{C-F}$  = 272.9 Hz, CF<sub>3</sub>), 118.7\* (C<sub>Ar</sub>-H), 118.5 (C<sub>Ar</sub>-H), 115.8 (q,  $^3J_{C-F}$  = 3.6 Hz, C<sub>Ar</sub>-H), 112.7\* (C<sub>Ar</sub>-H), 112.4 (C<sub>Ar</sub>-H), 65.2 (C<sub>2</sub>), 59.4\* (C<sub>2</sub>), 50.9\* (C<sub>5</sub>), 50.0 (C<sub>5</sub>), 29.2 (C<sub>3</sub>), 28.9\* (C<sub>3</sub>), 23.7\* (C<sub>4</sub>), 22.0 (C<sub>4</sub>), 20.3 (CH<sub>3</sub>), 20.0\* (CH<sub>3</sub>). <sup>19</sup>F NMR (282 MHz, DMSO-*d*<sub>6</sub>):  $\delta$  -61.5 (CF<sub>3</sub>). IR (ATR) cm<sup>-1</sup>: 3336 (NH), 2972 (NH), 2830 (C-H), 1602 (C=N), 1275 (C=S), 1127 (C-N). MS (EI) *m/z* (%): 271 (100), 252 (23), 213 (22), 202 (11), 163 (12), 83 (16). HRMS: Calculated for [C<sub>27</sub>H<sub>25</sub>N<sub>4</sub>SF<sub>6</sub>]<sup>+</sup>: 551.1704 [(M+H)<sup>+</sup>]; found: 551.1698. The ee was determined by HPLC using a Chiralpak AD-H column [*n*-hexane/*i*PrOH (97:03)]; flow rate 1.00 mL/min;  $\tau_{\text{major}}$  = 19.741 min,  $\tau_{\text{minor}}$  = 22.974 min (91% ee).  $[\alpha]_{\text{D}}^{20}$ : +163.7 (*c* = 1.0, CH<sub>2</sub>Cl<sub>2</sub>). M.p. (CH<sub>2</sub>Cl<sub>2</sub>): 68-70 °C.

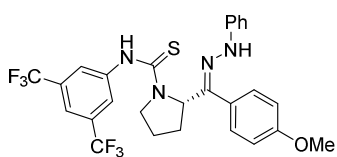

**(*S,E*)-*N*-[3,5-Bis(trifluoromethyl)phenyl]-2-[(4-methoxyphenyl)(2-phenylhydrazono)methyl]pyrrolidine-1-carbothioamide (**4z**).** Following *GP-F*, **4z** (31.0 mg, 0.055 mmol) was isolated by FC (petroleum ether/EtOAc gradient from 19:1 to 7:3) after 20h in 60% yield as a yellow solid starting from (*E*)-1-(4-methoxybenzylidene)-2-phenylhydrazine **1t** (20.4 mg, 0.09 mmol) and *N*-(3,5-bis(trifluoromethyl)phenyl)-2,3-dihydro-1*H*-pyrrole-1-carbothioamide **2e** (45.9 mg, 0.135 mmol) in the presence of catalyst (*R*)-TRIP (6.8 mg, 0.009 mmol), MS (4Å, 27 mg) and using dry toluene (0.18 mL) as solvent. R<sub>f</sub>: 0.40 (hexanes/EtOAc 8:2). <sup>1</sup>H NMR (500 MHz, DMSO-*d*<sub>6</sub>, 100 °C): (*E:Z* ratio: 6.2:1, \*denotes *Z* diastereoisomer resonances, #overlapped signals)  $\delta$  9.26 (s, 1H, CSNH), 9.01\* (s, 1H, NNH), 8.25 (s, 1H, NNH), 8.20 (s, 2H, C<sub>Ar</sub>-H), 7.97\* (s, 2H, C<sub>Ar</sub>-H), 7.64 (s, 1H, C<sub>Ar</sub>-H), 7.47-7.35 (m, 2H, C<sub>Ar</sub>-H), 7.23-7.14\* (m, 4H, C<sub>Ar</sub>-H), 7.14-7.02 (m, 6H, C<sub>Ar</sub>-H), 6.89\* (d, *J* = 8.7 Hz, 2H, C<sub>Ar</sub>-H), 6.80-6.74\* (m, 1H, C<sub>Ar</sub>-H), 6.74-6.68 (m, 1H, C<sub>Ar</sub>-H), 5.74-5.67\* (m, 1H, C<sub>2</sub>-H), 5.47-5.42 (m, 1H, C<sub>2</sub>-H), 4.00-3.88 (m, 1H, C<sub>5</sub>-H<sub>a</sub>), 3.88-3.80# (m, 4H, C<sub>5</sub>-H<sub>b</sub> + OCH<sub>3</sub>), 3.79\* (s, 4H, C<sub>5</sub>-H<sub>b</sub> + OCH<sub>3</sub>), 2.66-2.56\* (m, 1H, C<sub>3</sub>-H<sub>a</sub>), 2.24-1.90 (m, 4H, C<sub>3</sub>-H + C<sub>4</sub>-H). <sup>13</sup>C NMR (125 MHz, DMSO-*d*<sub>6</sub>, 100 °C):  $\delta$  178.2\* (CS), 177.9 (CS), 159.4 (C<sub>Ar</sub>-C), 158.6\* (C<sub>Ar</sub>-C), 145.8\* (C<sub>Ar</sub>-C), 145.2 (C<sub>Ar</sub>-C), 143.7 (C<sub>Ar</sub>-C), 142.4 (CN), 142.2\* (CN), 129.4 (q,  $^2J_{C-F}$  = 33.3 Hz, CCF<sub>3</sub>), 129.0 (C<sub>Ar</sub>-H), 128.2\* (C<sub>Ar</sub>-H), 128.0 (C<sub>Ar</sub>-H), 127.9\* (C<sub>Ar</sub>-H), 124.4 (C<sub>Ar</sub>-C), 123.7 (C<sub>Ar</sub>-H), 123.5\* (C<sub>Ar</sub>-H), 122.9 (q,  $^1J_{C-F}$  = 273.3 Hz, CF<sub>3</sub>), 118.6\* (C<sub>Ar</sub>-H), 118.5 (C<sub>Ar</sub>-H), 115.8 (q,  $^3J_{C-F}$  = 4.0 Hz, C<sub>Ar</sub>-H), 114.4 (C<sub>Ar</sub>-H), 112.9\* (C<sub>Ar</sub>-H), 112.6\* (C<sub>Ar</sub>-H), 112.4 (C<sub>Ar</sub>-H), 65.3 (C<sub>2</sub>), 58.9\* (C<sub>2</sub>), 54.8 (OCH<sub>3</sub>), 54.7\* (OCH<sub>3</sub>), 50.8\* (C<sub>5</sub>), 50.1 (C<sub>5</sub>), 29.2 (C<sub>3</sub>), 28.8\* (C<sub>3</sub>), 22.0 (C<sub>4</sub>). <sup>19</sup>F NMR (282 MHz, DMSO-*d*<sub>6</sub>):  $\delta$  -61.5 (CF<sub>3</sub>). IR (ATR) cm<sup>-1</sup>: 3334 (NH), 2973 (NH), 2820 (C-H), 1602 (C=N), 1278 (C=S), 1134 (C-N). MS (EI) *m/z* (%): 271 (100), 252 (23), 213 (22), 202 (11), 163 (12), 83 (6), 69 (7). HRMS: Calculated for [C<sub>27</sub>H<sub>25</sub>N<sub>4</sub>OSF<sub>6</sub>]<sup>+</sup>: 567.1653 [(M+H)<sup>+</sup>]; found: 567.1668. The ee was determined by HPLC using a Chiralpak

AD-H column [*n*-hexane/*i*PrOH (90:10)]; flow rate 1.00 mL/min;  $\tau_{\text{major}} = 12.553$  min,  $\tau_{\text{minor}} = 9.783$  min (83% ee).  $[\alpha]_{\text{D}}^{20}$ : +135.3 ( $c = 1.0$ ,  $\text{CH}_2\text{Cl}_2$ ). M.p. ( $\text{CH}_2\text{Cl}_2$ ): 76-78 °C.

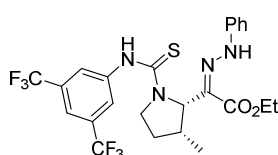

**(2S/3R)-Ethyl-(Z)-2-{1-[(3,5-bis(trifluoromethyl)phenyl)carbamothioyl]-3-**

**methylpyrrolidin-2-yl}-2-(2-phenylhydrazono)acetate (6a).** Following *GP-F* with slight modification, **6a** (29.8 mg, 0.054 mmol) was isolated by FC (petroleum ether/EtOAc gradient from 19:1 to 7:3) after 72h in 60% yield as a light yellow solid starting from ethyl (*E*)-2-(2-phenylhydrazono)acetate **1c** (17.2 mg, 0.09

mmol) and *N*-(3,5-bis(trifluoromethyl)phenyl)-4-methyl-2,3-dihydro-1*H*-pyrrole-1-carbathioamide **5a** ( $5 \times 7.9$  mg +  $1 \times 8.3$  mg every 14 h, 0.135 mmol) added in portions and in the presence of catalyst (*R*)-TRIP (6.8 mg, 0.009 mmol), MS ( $4\text{\AA}$ , 27 mg) and using dry toluene (0.18 mL) as solvent. R<sub>f</sub>: 0.81 (hexanes/EtOAc 7:3). <sup>1</sup>H NMR (500 MHz, DMSO-*d*<sub>6</sub>, 100 °C): (3.2:1 diastereoisomer ratio, \*denotes minor diastereoisomer resonances)  $\delta$  11.82 (s, 1H, NNH), 11.67\* (s, 1H, NNH), 9.16 (bs, 1H, CSNH), 8.18 (s, 2H, C<sub>Ar</sub>-H), 8.13\* (s, 2H, C<sub>Ar</sub>-H), 7.65\* (s, 1H, C<sub>Ar</sub>-H), 7.63 (s, 1H, C<sub>Ar</sub>-H), 7.34-7.24 (m, 2H, C<sub>Ar</sub>-H), 7.24-7.13 (m, 2H, C<sub>Ar</sub>-H), 6.99-6.91 (m, 1H, C<sub>Ar</sub>-H), 5.72-5.63 (m, 1H, C<sub>2</sub>-H), 5.13-5.07\* (m, 1H, C<sub>2</sub>-H), 4.39-4.24 (m, 2H, CH<sub>2</sub>CH<sub>3</sub>), 4.07-3.99 (m, 1H, C<sub>5</sub>-H<sub>a</sub>), 3.97-3.92\* (C<sub>5</sub>-H), 3.85-3.70 (m, 1H, C<sub>5</sub>-H<sub>b</sub>), 2.72-2.54 (m, 1H, C<sub>3</sub>-H), 2.30-2.13 (m, 1H, C<sub>4</sub>-H<sub>a</sub>), 2.13-1.90 (m, 1H, C<sub>4</sub>-H<sub>b</sub>), 1.77-1.66\* (m, 1H, C<sub>4</sub>-H<sub>b</sub>), 1.34 (t,  $J = 7.0$  Hz, 3H, CH<sub>2</sub>CH<sub>3</sub>), 1.19\* (d,  $J = 6.8$  Hz, 3H, CHCH<sub>3</sub>), 0.98 (d,  $J = 6.8$  Hz, CHCH<sub>3</sub>). <sup>13</sup>C NMR (125 MHz, DMSO-*d*<sub>6</sub>, 100 °C):  $\delta$  CS not detected 161.8 (CO), 161.4\* (CO), 143.0 (CN), 142.4 (C<sub>Ar</sub>-C), 129.3 (q, <sup>2</sup>*J*<sub>C-F</sub> = 33.1 Hz, CCF<sub>3</sub>), 128.7 (C<sub>Ar</sub>-H), 128.6\* (C<sub>Ar</sub>-H), 128.4 (C<sub>Ar</sub>-C), 122.8 (q, <sup>1</sup>*J*<sub>C-F</sub> = 272.6 Hz, CF<sub>3</sub>), 123.8 (C<sub>Ar</sub>-H), 121.4 (C<sub>Ar</sub>-H), 121.3\* (C<sub>Ar</sub>-H), 115.8 (q, <sup>3</sup>*J*<sub>C-F</sub> = 4.0 Hz, C<sub>Ar</sub>-H), 113.2\* (C<sub>Ar</sub>-H), 113.2 (C<sub>Ar</sub>-H), 68.4 (C<sub>2</sub>), 64.0\* (C<sub>2</sub>), 60.1 (CH<sub>2</sub>CH<sub>3</sub>), 49.1 (C<sub>5</sub>), 36.2 (C<sub>3</sub>), 30.6 (C<sub>4</sub>), 18.0\* (CHCH<sub>3</sub>), 13.6 (CHCH<sub>3</sub>), 13.4 (CH<sub>2</sub>CH<sub>3</sub>), 13.4\* (CH<sub>2</sub>CH<sub>3</sub>). <sup>19</sup>F NMR (282 MHz, DMSO-*d*<sub>6</sub>):  $\delta$  -61.5 (CF<sub>3</sub>). IR (ATR) cm<sup>-1</sup>: 3253 (NH), 2966 (NH), 2830 (C-H), 1681 (C=O), 1603 (C=N), 1277 (C=S), 1132 (C-N). MS (EI) *m/z* (%): 271 (100), 252 (26), 213 (26), 202 (11), 163 (13), 83 (84), 69 (16). HRMS: Calculated for [C<sub>24</sub>H<sub>25</sub>N<sub>4</sub>O<sub>2</sub>SF<sub>6</sub>]<sup>+</sup>: 547.1602 [(M+H)<sup>+</sup>]; found: 547.1613. The ee was determined by HPLC using a Chiralpak IA column [*n*-hexane/*i*PrOH (90:10)]; flow rate 1.00 mL/min;  $\tau_{\text{major}} = 11.179$  min,  $\tau_{\text{minor}} = 8.525$  min (For the major diastereoisomer: 97% ee).  $[\alpha]_{\text{D}}^{20}$ : -87.7 ( $c = 0.75$ ,  $\text{CH}_2\text{Cl}_2$ ). M.p. ( $\text{CH}_2\text{Cl}_2$ ): 190-192 °C.

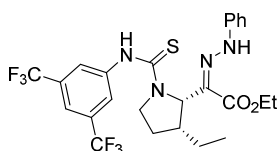

**(2S/3R)-Ethyl-(Z)-2-{1-[(3,5-bis(trifluoromethyl)phenyl)carbamothioyl]-3-**

**ethylpyrrolidin-2-yl}-2-(2-phenylhydrazono)acetate (6b).** Following *GP-F*, **6b** (44.8 mg, 0.080 mmol) was isolated by FC (petroleum ether/EtOAc gradient from 19:1 to 7:3) after 68h in 89% yield as a light yellow solid starting from ethyl (*E*)-2-(2-phenylhydrazono)acetate **1c** (17.2 mg, 0.09

mmol) and *N*-(3,5-bis(trifluoromethyl)phenyl)-4-ethyl-2,3-dihydro-1*H*-pyrrole-1-carbathioamide **5b** (49.7 mg, 0.135 mmol) in the presence of catalyst (*R*)-TRIP (6.8 mg, 0.009 mmol), MS ( $4\text{\AA}$ , 27 mg) and using dry toluene (0.18 mL) as solvent. R<sub>f</sub>: 0.59 (hexanes/EtOAc 8:2). <sup>1</sup>H NMR (500 MHz, DMSO-*d*<sub>6</sub>, 100 °C): (2.5:1 diastereoisomer ratio, \*denotes minor diastereoisomer resonances)  $\delta$  11.81 (s, 1H, NNH), 11.70\* (s, 1H, NNH), 9.20\* (s, 1H, CSNH), 9.14 (s, 1H, CSNH), 8.20 (s, 2H, C<sub>Ar</sub>-H), 8.13\* (s, 2H, C<sub>Ar</sub>-H), 7.63 (s, 1H, C<sub>Ar</sub>-H), 7.32-7.23 (m, 2H, C<sub>Ar</sub>-H), 7.22\* (d,  $J = 7.9$  Hz, 2H, C<sub>Ar</sub>-H), 7.18 (d,  $J = 7.9$  Hz, 2H, C<sub>Ar</sub>-H), 6.98-6.92 (m, C<sub>Ar</sub>-H), 5.76-5.68 (m, 1H, C<sub>2</sub>-H), 5.30-5.22\* (m, 1H, C<sub>2</sub>-H), 4.33 (q,  $J = 7.3$  Hz, 2H, OCH<sub>2</sub>CH<sub>3</sub>), 4.23-4.12\* (m, 2H, OCH<sub>2</sub>CH<sub>3</sub>), 4.08-4.02 (m, 1H, C<sub>5</sub>-H<sub>a</sub>), 3.97-3.88\* (m, 2H, C<sub>5</sub>-H), 3.83-3.73 (m, 1H, C<sub>5</sub>-H<sub>b</sub>), 2.46-2.37 (m, 1H, C<sub>3</sub>-H), 2.32-2.21 (m, 1H, C<sub>4</sub>-H<sub>a</sub>), 2.12-1.97 (m, 1H, C<sub>4</sub>-H<sub>b</sub>), 1.85-1.74\* (m, 1H, C<sub>4</sub>-H<sub>b</sub>), 1.66-1.43 (m, 1H, CHCH<sub>a</sub>H<sub>b</sub>CH<sub>3</sub>), 1.33 (t,  $J = 7.3$  Hz, 3H, OCH<sub>2</sub>CH<sub>3</sub>), 1.21-1.07 (m, 1H, CHCH<sub>a</sub>H<sub>b</sub>CH<sub>3</sub>), 1.03\* (t,  $J = 7.3$  Hz, 3H, CHCH<sub>2</sub>CH<sub>3</sub>), 0.95 (t,  $J = 7.3$  Hz, 3H, CHCH<sub>2</sub>CH<sub>3</sub>). <sup>13</sup>C NMR (125 MHz, DMSO-*d*<sub>6</sub>, 100 °C):  $\delta$  177.1 (CS), 161.8 (COO), 142.9 (C<sub>Ar</sub>-C), 142.4 (CN), 129.3 (q, <sup>2</sup>*J*<sub>C-F</sub> = 29.7 Hz, CCF<sub>3</sub>), 128.7 (C<sub>Ar</sub>-H), 128.6\* (C<sub>Ar</sub>-H), 128.4 (C<sub>Ar</sub>-C), 122.7 (q, <sup>1</sup>*J*<sub>C-F</sub> = 272.8 Hz, CF<sub>3</sub>), 123.8 (C<sub>Ar</sub>-H), 121.4 (C<sub>Ar</sub>-H), 121.3\* (C<sub>Ar</sub>-H), 115.8 (C<sub>Ar</sub>-H), 113.2 (C<sub>Ar</sub>-H), 66.3\* (C<sub>2</sub>), 63.3 (C<sub>2</sub>), 60.1 (OCH<sub>2</sub>CH<sub>3</sub>), 59.3\* (OCH<sub>2</sub>CH<sub>3</sub>), 49.0\* (C<sub>5</sub>), 48.5 (C<sub>5</sub>), 45.2\* (C<sub>3</sub>), 44.0 (C<sub>3</sub>), 28.3 (C<sub>4</sub>), 21.7 (CHCH<sub>2</sub>CH<sub>3</sub>), 13.4 (OCH<sub>2</sub>CH<sub>3</sub>), 11.7 (CHCH<sub>2</sub>CH<sub>3</sub>), 11.1\* (CHCH<sub>2</sub>CH<sub>3</sub>). <sup>19</sup>F NMR (282 MHz, DMSO-*d*<sub>6</sub>):  $\delta$  -61.5 (CF<sub>3</sub>). IR (ATR) cm<sup>-1</sup>: 3257 (NH), 2966 (NH), 2872 (C-H), 1682 (C=O), 1603 (C=N), 1276 (C=S), 1129 (C-N). MS (EI) *m/z* (%): 271 (100), 252 (23), 213 (27), 163 (12), 83 (63), 69 (11). HRMS: Calculated for [C<sub>25</sub>H<sub>27</sub>N<sub>4</sub>O<sub>2</sub>SF<sub>6</sub>]<sup>+</sup>: 561.1759 [(M+H)<sup>+</sup>]; found: 561.1769. The ee was determined by HPLC using a Chiralpak AD-H column [*n*-hexane/*i*PrOH (90:10)]; flow rate 1.00 mL/min;  $\tau_{\text{major}} = 20.686$  min,  $\tau_{\text{minor}} = 4.110$  min (For the major diastereoisomer: >99% ee).  $[\alpha]_{\text{D}}^{20}$ : -254.2 ( $c = 1.0$ ,  $\text{CH}_2\text{Cl}_2$ ). M.p. ( $\text{CH}_2\text{Cl}_2$ ): 185-187 °C.



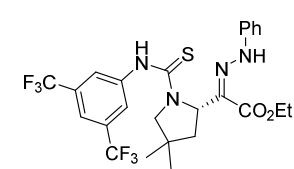

**(S)-Ethyl-(Z)-2-{1-[(3,5-bis(trifluoromethyl)phenyl)carbamothioyl]-4,4-dimethylpyrrolidin-2-yl}-2-(2-phenylhydrazono)acetate (**6c**).** Following *GP-F*, **6c** (45.0 mg, 0.080 mmol) was isolated by FC (petroleum ether/EtOAc gradient from 19:1 to 7:3) after 20h in 89% yield as a light yellow solid starting from ethyl (*E*)-2-(2-phenylhydrazono)acetate **1c** (17.2 mg, 0.09 mmol) and *N*-(3,5-bis(trifluoromethyl)phenyl)-3,3-dimethyl-2,3-dihydro-1*H*-pyrrole-1-carbathioamide **5c** (49.7 mg, 0.135 mmol) in the presence of catalyst (*R*)-TRIP (3.4 mg, 0.0045 mmol), MS (4Å, 27 mg) and using dry toluene (0.18 mL) as solvent. *R<sub>f</sub>*: 0.67 (hexanes/EtOAc 7:3). <sup>1</sup>H NMR (500 MHz, DMSO-*d*<sub>6</sub>, 100 °C): (*Z*:*E* ratio: 3.1:1, \*denotes *E* diastereoisomer resonances) δ 11.63 (s, 1H, NNH), 9.97\* (s, 1H, NNH), 9.37\* (s, 1H, CSNH), 9.27 (s, 1H, CSNH), 8.19\* (s, 2H, C<sub>Ar</sub>-H), 8.11 (s, 2H, C<sub>Ar</sub>-H), 7.62\* (s, 1H, C<sub>Ar</sub>-H), 7.59 (s, 1H, C<sub>Ar</sub>-H), 7.29-7.17 (m, 4H, C<sub>Ar</sub>-H), 6.97-6.84 (m, 1H, C<sub>Ar</sub>-H), 5.73-5.62\* (m, 1H, C<sub>2</sub>-H), 5.50-5.40 (m, 1H, C<sub>2</sub>-H), 4.34-4.26 (m, 2H, CH<sub>2</sub>CH<sub>3</sub>), 4.22-4.12\* (m, 2H, CH<sub>2</sub>CH<sub>3</sub>), 3.93-3.82 (m, 1H, C<sub>5</sub>-H<sub>a</sub>), 3.74-3.62\* (m, 2H, C<sub>5</sub>-H), 3.62-3.54 (m, 1H, C<sub>5</sub>-H<sub>b</sub>), 2.27 (dd, *J* = 12.3, 8.2 Hz, 1H, C<sub>3</sub>-H<sub>a</sub>), 2.22-2.15\* (m, 1H, C<sub>3</sub>-H<sub>a</sub>), 1.95 (dd, *J* = 12.5, 8.1 Hz, 1H, C<sub>3</sub>-H<sub>b</sub>), 1.91-1.84\* (m, 1H, C<sub>3</sub>-H<sub>b</sub>), 1.34 (t, *J* = 7.1 Hz, 3H, CH<sub>2</sub>CH<sub>3</sub>), 1.25\* (t, *J* = 7.1 Hz, 3H, CH<sub>2</sub>CH<sub>3</sub>), 1.21\* (s, 3H, CH<sub>3</sub>), 1.19 (s, 3H, CH<sub>3</sub>), 1.15\* (s, 3H, CH<sub>3</sub>), 1.14 (s, 3H, CH<sub>3</sub>). <sup>13</sup>C NMR (125 MHz, DMSO-*d*<sub>6</sub>, 100 °C): δ 178.4 (CS), 161.3 (COO), 144.1 (C<sub>Ar</sub>-C), 142.9 (C<sub>Ar</sub>-C), 142.4 (CN), 129.4 (q, <sup>2</sup>*J*<sub>C-F</sub> = 32.4 Hz, CCF<sub>3</sub>), 128.6 (C<sub>Ar</sub>-H), 128.3\* (C<sub>Ar</sub>-H), 123.0 (C<sub>Ar</sub>-H), 122.7 (q, <sup>1</sup>*J*<sub>C-F</sub> = 271.5 Hz, CF<sub>3</sub>), 122.6\* (C<sub>Ar</sub>-H), 121.4 (C<sub>Ar</sub>-H), 120.5\* (C<sub>Ar</sub>-H), 115.5 (C<sub>Ar</sub>-H), 113.5\* (C<sub>Ar</sub>-H), 113.3 (C<sub>Ar</sub>-H), 63.4 (C<sub>5</sub>), 61.3 (C<sub>2</sub>), 60.2 (CH<sub>2</sub>CH<sub>3</sub>), 59.3\* (CH<sub>2</sub>CH<sub>3</sub>), 45.4 (C<sub>3</sub>), 36.5 (C<sub>4</sub>), 26.2 (CH<sub>3</sub>), 25.8\* (CH<sub>3</sub>), 25.5 (CH<sub>3</sub>), 25.0\* (CH<sub>3</sub>), 13.6\* (CH<sub>2</sub>CH<sub>3</sub>), 13.4 (CH<sub>2</sub>CH<sub>3</sub>). <sup>19</sup>F NMR (282MHz, DMSO-*d*<sub>6</sub>): δ -61.6 (CF<sub>3</sub>). IR (ATR) cm<sup>-1</sup>: 3248 (NH), 2962 (NH), 2820 (C-H), 1681 (C=O), 1603 (C=N), 1276 (C=S), 1127 (C-N). MS (EI) *m/z* (%): 271 (100), 252 (23), 213 (23), 202 (10), 163 (12), 83 (8). HRMS: Calculated for [C<sub>25</sub>H<sub>27</sub>N<sub>4</sub>O<sub>2</sub>SF<sub>6</sub>]<sup>+</sup>: 561.1759 [(M+H)<sup>+</sup>]; found: 561.1769. The ee was determined by HPLC using a Chiralpak AD-H column [*n*-hexane/*i*PrOH (90:10)]; flow rate 1.00 mL/min; τ<sub>major</sub> = 4.858 min, τ<sub>minor</sub> = 10.813 min (>99% ee). [α]<sub>D</sub><sup>20</sup>: +258.3 (*c* = 1.0, CH<sub>2</sub>Cl<sub>2</sub>). M.p. (CH<sub>2</sub>Cl<sub>2</sub>): 110-112 °C.

### 3.5. Oxidative cleavage of hydrazone moiety (Scheme 3)

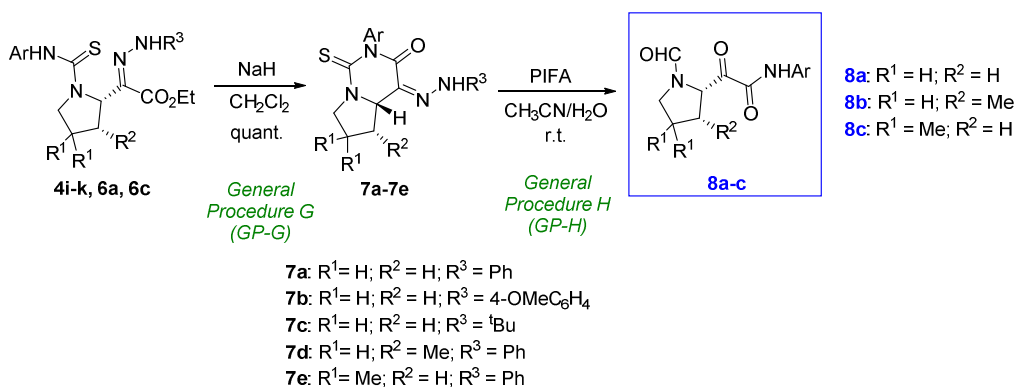

**Scheme SI-7.** Synthesis of α-ketoamides **8a-c**

**General Procedure G (GP-G).** Under inert atmosphere, to a stirred solution of hydrazone (0.38 mmol, 1.0 eq.) in CH<sub>2</sub>Cl<sub>2</sub> (4.2 mL), sodium hydride (0.46 mmol, 1.2 eq.) was added. The reaction mixture was allowed to stir at room temperature until completion of the reaction. Then, water was added and the mixture was extracted with CH<sub>2</sub>Cl<sub>2</sub>, washed with brine, dried over Na<sub>2</sub>SO<sub>4</sub> and concentrated *in vacuo* and was used for the next step without further purification.

**General Procedure H (GP-H).** PIFA (0.696 mmol, 3 eq.) was added to a cooled solution (0 °C) of **7a-e** (0.232 mmol, 1 eq.) in CH<sub>3</sub>CN/H<sub>2</sub>O (5/1). The reaction was allowed to stir at room temperature for 10 min and then the mixture was diluted with CH<sub>2</sub>Cl<sub>2</sub>, washed with saturated NaHCO<sub>3</sub> solution and water, dried over Na<sub>2</sub>SO<sub>4</sub> and concentrated *in vacuo*. The crude mixture (**7a-e**) was redissolved in CH<sub>3</sub>CN/H<sub>2</sub>O (5/1) and cooled to 0 °C. PIFA (0.27 mmol, 1.2 eq.) was added and the reaction was allowed to stir at room temperature for 10 min and then the mixture was diluted with CH<sub>2</sub>Cl<sub>2</sub>, washed with saturated NaHCO<sub>3</sub> solution and water, dried over Na<sub>2</sub>SO<sub>4</sub> and concentrated *in vacuo*. The crude residue was purified by flash column chromatography on silica gel. After purification, the product racemizes with time.

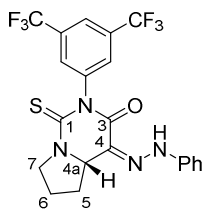

**(*S,Z*)-2-[3,5-Bis(trifluoromethyl)phenyl]-4-(2-phenylhydrazono)-1-**

**thioxohexahydropyrrolo[1,2-*c*]pyrimidin-3(4*H*)-one (7a).** Following *GP-G*, **7a** (116

mg, 0.238 mmol) was isolated after 30 min in >99% yield as a yellow solid starting from

(*S*)-ethyl-(*Z*)-2-{1-[3,5-bis(trifluoromethyl)phenyl]carbamothioyl}pyrrolidin-2-yl}-2-

(2-phenylhydrazono)acetate **4i** (129 mg, 0.24 mmol, >99% ee) and NaH (11.6 mg, 0.29

mmol, 60% in mineral oil) in CH<sub>2</sub>Cl<sub>2</sub> (3.0 mL). R<sub>f</sub>: 0.8 (hexanes/EtOAc 8:2). <sup>1</sup>H NMR

(300 MHz, CDCl<sub>3</sub>): δ 12.56 (s, 1H, NH), 7.94 (s, 1H, C<sub>Ar</sub>-H), 7.73 (s, 2H, C<sub>Ar</sub>-H), 7.34

(appt t, *J* = 7.7 Hz, 2H, C<sub>Ar</sub>-H), 7.20 (d, *J* = 8.0 Hz, 2H, C<sub>Ar</sub>-H), 7.07 (appt t, *J* = 7.2 Hz,

1H, C<sub>Ar</sub>-H), 4.71 (dd, *J* = 9.8, 5.9 Hz, 1H, C<sub>4a</sub>-H), 4.15-4.02 (m, 1H, C<sub>7</sub>-H<sub>a</sub>), 3.99-3.82 (m, 1H, C<sub>7</sub>-H<sub>b</sub>), 2.80-

2.68 (m, 1H, C<sub>5</sub>-H<sub>a</sub>), 2.45-2.06 (m, 3H, C<sub>5</sub>-H<sub>b</sub> + C<sub>6</sub>-H). <sup>13</sup>C NMR (75 MHz, CDCl<sub>3</sub>): δ 175.5 (C<sub>1</sub>), 158.5 (C<sub>3</sub>),

142.3 (C<sub>Ar</sub>-C), 139.5 (C<sub>4</sub>), 132.3 (q, <sup>2</sup>*J*<sub>C-F</sub> = 34.0 Hz, CCF<sub>3</sub>), 131.0 (C<sub>Ar</sub>-H), 129.7 (C<sub>Ar</sub>-H), 124.0 (C<sub>Ar</sub>-H),

123.1 (q, <sup>1</sup>*J*<sub>C-F</sub> = 272.6 Hz, CF<sub>3</sub>), 122.7 (q, <sup>3</sup>*J*<sub>C-F</sub> = 3.5 Hz, C<sub>Ar</sub>-H), 120.8 (C<sub>Ar</sub>-C), 114.6 (C<sub>Ar</sub>-H), 61.1 (C<sub>4a</sub>),

53.5 (C<sub>7</sub>), 31.1 (C<sub>5</sub>), 22.6 (C<sub>6</sub>). <sup>19</sup>F NMR (282 MHz, CDCl<sub>3</sub>): δ -62.7 (CF<sub>3</sub>). IR (ATR) cm<sup>-1</sup>: 2930 (NH), 1660

(C=O), 1548 (C=N), 1277 (C=S), 1122 (C-N). MS (EI) *m/z* (%): 486 (M<sup>+</sup>, 100), 381 (19), 252 (11), 207 (16),

77 (45), 69 (11). HRMS: Calculated for [C<sub>21</sub>H<sub>17</sub>N<sub>4</sub>OSF<sub>6</sub>]<sup>+</sup>: 487.1027 [(M+H)<sup>+</sup>]; found: 487.1026. The ee was

determined by HPLC using a Chiralpak AD-H column [*n*-hexane/*i*PrOH (98:02)]; flow rate 1.00 mL/min;

τ<sub>major</sub> = 6.439 min, τ<sub>minor</sub> = 7.654 min (>99% ee). [α]<sub>D</sub><sup>20</sup>: -186.5 (*c* = 0.8, CH<sub>2</sub>Cl<sub>2</sub>). M.p. (CH<sub>2</sub>Cl<sub>2</sub>): 176-178 °C.

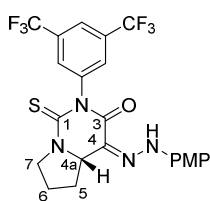

**(*S,Z*)-2-[3,5-bis(trifluoromethyl)phenyl]-4-[2-(4-methoxyphenyl)hydrazono]-1-**

**thioxohexahydropyrrolo[1,2-*c*]pyrimidin-3(4*H*)-one (7b).** Following *GP-G*, **7b** (91.7

mg, 0.177 mmol) was isolated after 30 min in >99% yield as a yellow solid starting from

(*S*)-ethyl-(*Z*)-2-{1-[3,5-bis(trifluoromethyl)phenyl]carbamothioyl}pyrrolidin-2-yl}-2-

[2-(4-methoxyphenyl)hydrazono]acetate **4j** (100 mg, 0.177 mmol, 98% ee) and NaH (8.5 mg, 0.21

mmol, 60% in mineral oil) in CH<sub>2</sub>Cl<sub>2</sub> (2.0 mL). R<sub>f</sub>: 0.51

(hexanes/EtOAc 8:2). <sup>1</sup>H NMR (300 MHz, CDCl<sub>3</sub>): δ 12.63 (s, 1H, NH), 7.93 (s, 1H,

C<sub>Ar</sub>-H), 7.73 (s, 2H, C<sub>Ar</sub>-H), 7.15 (d, *J* = 9.0 Hz, 2H, C<sub>Ar</sub>-H), 6.89 (d, *J* = 9.0 Hz, 2H, C<sub>Ar</sub>-H), 4.70 (dd, *J* =

9.9, 5.9 Hz, 1H, C<sub>4a</sub>-H), 4.14-4.02 (m, 1H, C<sub>7</sub>-H<sub>a</sub>), 3.98-3.78 (m, 4H, C<sub>7</sub>-H<sub>b</sub> + OCH<sub>3</sub>), 2.79-2.66 (m, 1H, C<sub>5</sub>-

H<sub>a</sub>), 2.42-2.05 (m, 3H, C<sub>5</sub>-H<sub>b</sub> + C<sub>6</sub>-H). <sup>13</sup>C NMR (75 MHz, CDCl<sub>3</sub>): δ 175.5 (C<sub>1</sub>), 158.6 (C<sub>3</sub>), 156.6 (C<sub>Ar</sub>-C),

139.6 (C<sub>4</sub>), 136.1 (C<sub>Ar</sub>-C), 132.3 (q, <sup>2</sup>*J*<sub>C-F</sub> = 33.9 Hz, CCF<sub>3</sub>), 131.0 (C<sub>Ar</sub>-H), 123.1 (q, <sup>1</sup>*J*<sub>C-F</sub> = 271.9 Hz, CF<sub>3</sub>),

122.6 (q, <sup>3</sup>*J*<sub>C-F</sub> = 3.8 Hz, C<sub>Ar</sub>-H), 119.5 (C<sub>Ar</sub>-C), 115.9 (C<sub>Ar</sub>-H), 115.0 (C<sub>Ar</sub>-H), 61.0 (C<sub>4a</sub>), 55.7 (OCH<sub>3</sub>), 53.5

(C<sub>7</sub>), 31.2 (C<sub>5</sub>), 22.6 (C<sub>6</sub>). <sup>19</sup>F NMR (282 MHz, CDCl<sub>3</sub>): δ -62.7 (CF<sub>3</sub>). IR (ATR) cm<sup>-1</sup>: 2917 (NH), 2847 (C-

H), 1741 (C=O), 1514 (C=N), 1279 (C=S), 1124 (C-N). MS (EI) *m/z* (%): 271 (100), 252 (31), 213 (27), 202

(14), 163 (16), 108 (10), 83 (100), 69 (15). HRMS: Calculated for [C<sub>22</sub>H<sub>19</sub>N<sub>4</sub>O<sub>2</sub>SF<sub>6</sub>]<sup>+</sup>: 517.1133 [(M+H)<sup>+</sup>];

found: 517.1122. The ee was determined by HPLC using a Chiralpak AD-H column [*n*-hexane/*i*PrOH

(95:05)]; flow rate 1.00 mL/min; τ<sub>major</sub> = 6.642 min, τ<sub>minor</sub> = 7.732 min (96% ee). [α]<sub>D</sub><sup>20</sup>: -191.3 (*c* = 1.0,

CH<sub>2</sub>Cl<sub>2</sub>). M.p. (CH<sub>2</sub>Cl<sub>2</sub>): 178-180 °C.

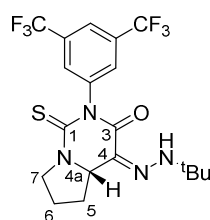

**(*S,Z*)-2-[3,5-Bis(trifluoromethyl)phenyl]-4-[2-(*tert*-butyl)hydrazono]-1-**

**thioxohexahydropyrrolo[1,2-*c*]pyrimidin-3(4*H*)-one (7c).** Following *GP-G*, **7c** (121

mg, 0.261 mmol) was isolated after 30 min in 91% yield as a light yellow solid starting from

(*S*)-ethyl-(*Z*)-2-{1-[3,5-bis(trifluoromethyl)phenyl]carbamothioyl}pyrrolidin-2-yl}-2-

[2-(*tert*-butyl)hydrazono]acetate **4k** (147 mg, 0.287 mmol, 91% ee) and NaH (13.8 mg, 0.43

mmol, 60% in mineral oil) in CH<sub>2</sub>Cl<sub>2</sub> (1.8 mL). R<sub>f</sub>: 0.68

(hexanes/EtOAc 8:2). <sup>1</sup>H NMR (300 MHz, CDCl<sub>3</sub>): δ 10.88 (s, 1H, NH), 7.90 (s, 1H,

C<sub>Ar</sub>-H), 7.71 (s, 2H, C<sub>Ar</sub>-H), 4.59 (dd, *J* = 9.2, 6.1 Hz, 1H, C<sub>4a</sub>-H), 4.08-3.96 (m, 1H, C<sub>7</sub>-H<sub>a</sub>), 3.94-3.78 (m,

1H, C<sub>7</sub>-H<sub>b</sub>), 2.66-2.52 (m, 1H, C<sub>5</sub>-H<sub>a</sub>), 2.29-1.97 (m, 3H, C<sub>5</sub>-H<sub>b</sub> + C<sub>6</sub>-H), 1.28 (s, 9H, C(CH<sub>3</sub>)<sub>3</sub>). <sup>13</sup>C NMR (75

MHz, CDCl<sub>3</sub>): δ 175.7 (C<sub>1</sub>), 158.3 (C<sub>3</sub>), 139.9 (C<sub>4</sub>), 132.1 (q, <sup>2</sup>*J*<sub>C-F</sub> = 33.7 Hz, CCF<sub>3</sub>), 131.2 (C<sub>Ar</sub>-H), 123.1

(q, <sup>1</sup>*J*<sub>C-F</sub> = 272.8 Hz, CF<sub>3</sub>), 122.4 (q, <sup>3</sup>*J*<sub>C-F</sub> = 3.7 Hz, C<sub>Ar</sub>-H), 116.6 (C<sub>Ar</sub>-C), 61.0 (C<sub>4a</sub>), 56.0 (C(CH<sub>3</sub>)<sub>3</sub>), 53.3

(C<sub>7</sub>), 31.1 (C<sub>5</sub>), 28.7 (C(CH<sub>3</sub>)<sub>3</sub>), 22.6 (C<sub>6</sub>). <sup>19</sup>F NMR (282 MHz, CDCl<sub>3</sub>): δ -62.7 (CF<sub>3</sub>). IR (ATR) cm<sup>-1</sup>: 2925

(NH), 2883 (C-H), 1658 (C=O), 1538 (C=N), 1274 (C=S), 1120 (C-N). MS (EI) *m/z* (%): 466 (M<sup>+</sup>, 100), 451

(45), 381 (22), 252 (12), 213 (12), 152 (16), 82 (17), 69 (12), 57 (35). HRMS: Calculated for [C<sub>19</sub>H<sub>21</sub>N<sub>4</sub>OSF<sub>6</sub>]<sup>+</sup>:

467.1340 [(M+H)<sup>+</sup>]; found: 467.1348. The ee was determined by HPLC using a Chiralcel

OZ-3 column [*n*-hexane/*i*PrOH (95:05)]; flow rate 0.70 mL/min; τ<sub>major</sub> = 5.416 min, τ<sub>minor</sub> = 4.948 min (87%

ee). [α]<sub>D</sub><sup>20</sup>: -20.8 (*c* = 1.0, CH<sub>2</sub>Cl<sub>2</sub>). M.p. (CH<sub>2</sub>Cl<sub>2</sub>): 197-199 °C.

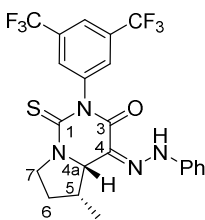

**(4aS,5R,Z)-2-[3,5-bis(trifluoromethyl)phenyl]-5-methyl-4-(2-phenylhydrazono)-1-thioxohexahydropyrrolo[1,2-c]pyrimidin-3(4H)-one (7d).** Following *GP-G*, **7d** (46.7 mg, 0.093 mmol) was isolated after 30 min in >99% yield as an orange solid starting from a mixture of diastereoisomers 3.2:1 of (2*S*,3*R*)-ethyl-(*Z*)-2-{1-[(3,5-bis(trifluoromethyl)phenyl)carbamothioyl]-3-methylpyrrolidin-2-yl}-2-(2-phenylhydrazono)acetate **6a** (51.2 mg, 0.094 mmol, 97% ee) and NaH (5.6 mg, 0.14 mmol, 60% in mineral oil) in CH<sub>2</sub>Cl<sub>2</sub> (0.6 mL). <sup>1</sup>H NMR (300 MHz, CDCl<sub>3</sub>): (3.0:1 diastereoisomer ratio, \*denotes minor diastereoisomer resonances) δ 12.90 (s, 1H, NH), 12.57\* (s, 1H, NH), 7.94 (s, 1H, C<sub>Ar</sub>-H), 7.73 (s, 2H, C<sub>Ar</sub>-H), 7.34 (appt t, *J* = 7.8 Hz, 2H, C<sub>Ar</sub>-H), 7.20 (d, *J* = 8.0 Hz, 2H, C<sub>Ar</sub>-H), 7.08 (appt t, *J* = 7.3 Hz, 1H, C<sub>Ar</sub>-H), 4.78 (d, *J* = 4.6 Hz, 1H, C<sub>4a</sub>-H), 4.69\* (d, *J* = 4.2 Hz, 1H, C<sub>4a</sub>-H), 4.17-4.08\* (m, 1H, C<sub>7</sub>-H), 4.01 (dd, *J* = 10.5, 4.4 Hz, 1H, C<sub>7</sub>-H), 3.25-3.12\* (m, 1H, C<sub>5</sub>-H), 3.10-2.98 (m, 1H, C<sub>5</sub>-H), 2.34-2.17 (m, 1H, C<sub>6</sub>-H<sub>a</sub>), 2.01-1.90 (m, 1H, C<sub>6</sub>-H<sub>b</sub>), 1.13 (d, *J* = 6.9 Hz, 3H, CH<sub>3</sub>), 1.02\* (d, *J* = 6.9 Hz, 3H, CH<sub>3</sub>). <sup>13</sup>C NMR (75 MHz, CDCl<sub>3</sub>): δ 175.8 (C<sub>1</sub>), 158.7 (C<sub>3</sub>), 142.3 (C<sub>Ar</sub>-C), 139.7 (C<sub>4</sub>), 132.4 (q, <sup>2</sup>*J*<sub>C-F</sub> = 33.4 Hz, CCF<sub>3</sub>), 130.9 (C<sub>Ar</sub>-H), 129.7 (C<sub>Ar</sub>-H), 124.1 (C<sub>Ar</sub>-H), 123.1 (q, <sup>1</sup>*J*<sub>C-F</sub> = 273.1 Hz, CF<sub>3</sub>), 122.7 (q, <sup>3</sup>*J*<sub>C-F</sub> = 3.7 Hz, C<sub>Ar</sub>-H), 118.6 (C<sub>Ar</sub>-C), 114.7 (C<sub>Ar</sub>-H), 114.6\* (C<sub>Ar</sub>-H), 65.5\* (C<sub>4a</sub>), 64.5 (C<sub>4a</sub>), 51.8 (C<sub>7</sub>), 36.4 (C<sub>5</sub>), 29.8 (C<sub>6</sub>), 14.3\* (CH<sub>3</sub>), 14.0 (CH<sub>3</sub>). <sup>19</sup>F NMR (282 MHz, CDCl<sub>3</sub>): δ -62.8\* (CF<sub>3</sub>), -62.7 (2 × CF<sub>3</sub>). IR (ATR) cm<sup>-1</sup>: 2973 (NH), 2876 (C-H), 1665 (C=O), 1552 (C=N), 1275 (C=S), 1124 (C-N). MS (EI) *m/z* (%): 500 (M<sup>+</sup>, 100), 395 (10), 252 (15), 207 (31), 92 (22), 77 (39), 65 (17). HRMS: Calculated for [C<sub>22</sub>H<sub>19</sub>N<sub>4</sub>OSF<sub>6</sub>]<sup>+</sup>: 501.1184 [(M+H)<sup>+</sup>]; found: 501.1186. The ee was determined by HPLC using a Chiralpak IE-3 column [*n*-hexane/*i*PrOH (95:05)]; flow rate 0.70 mL/min; τ<sub>major</sub> = 6.953 min, τ<sub>minor</sub> = 7.400 min (For the major diastereoisomer: 96% ee). [α]<sub>D</sub><sup>20</sup>: -55.7 (*c* = 1.0, CH<sub>2</sub>Cl<sub>2</sub>). M.p. (CH<sub>2</sub>Cl<sub>2</sub>): Decomposition before melting.

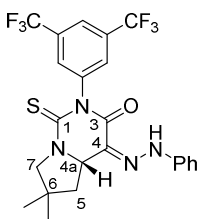

**(S,Z)-2-[3,5-Bis(trifluoromethyl)phenyl]-6,6-dimethyl-4-(2-phenylhydrazono)-1-thioxohexahydropyrrolo[1,2-c]pyrimidin-3(4H)-one (7e).** Following *GP-G*, **7e** (104 mg, 0.20 mmol) was isolated after 30 min in >99% yield as an orange solid starting from (*S*)-ethyl-(*Z*)-2-{1-[(3,5-bis(trifluoromethyl)phenyl)carbamothioyl]-4,4-dimethylpyrrolidin-2-yl}-2-(2-phenylhydrazono)acetate **6c** (114 mg, 0.20 mmol, >99% ee) and NaH (9.8 mg, 0.24 mmol, 60% in mineral oil) in CH<sub>2</sub>Cl<sub>2</sub> (1.4 mL). R<sub>f</sub>: 0.67 (hexanes/EtOAc 8:2). <sup>1</sup>H NMR (300 MHz, CDCl<sub>3</sub>): (*Z*:*E* ratio: 8.9:1, \*denotes *E* diastereoisomer resonances) δ 12.52 (s, 1H, NH), 8.47\* (s, 1H, NH), 7.95 (s, 1H, C<sub>Ar</sub>-H), 7.92\* (s, 1H, C<sub>Ar</sub>-H), 7.76 (s, 2H, C<sub>Ar</sub>-H), 7.72\* (s, 2H, C<sub>Ar</sub>-H), 7.40-7.30 (m, 2H, C<sub>Ar</sub>-H), 7.24-7.17 (m, 2H, C<sub>Ar</sub>-H), 7.07 (appt t, *J* = 7.3 Hz, 1H, C<sub>Ar</sub>-H), 4.92 (dd, *J* = 10.2, 6.1 Hz, 1H, C<sub>4a</sub>-H), 3.86 (d, *J* = 12.9 Hz, 1H, C<sub>7</sub>-H<sub>a</sub>), 3.70 (d, *J* = 12.9 Hz, C<sub>7</sub>-H<sub>b</sub>), 2.46 (dd, *J* = 12.8, 6.1 Hz, C<sub>5</sub>-H<sub>a</sub>), 2.30 (dd, *J* = 12.8, 10.2 Hz, C<sub>5</sub>-H<sub>b</sub>), 1.31 (s, 6H, 2 × CH<sub>3</sub>). <sup>13</sup>C NMR (75 MHz, CDCl<sub>3</sub>): δ 175.5 (C<sub>1</sub>), 158.5 (C<sub>3</sub>), 142.3 (C<sub>Ar</sub>-C), 139.4 (C<sub>4</sub>), 132.3 (q, <sup>2</sup>*J*<sub>C-F</sub> = 34.0 Hz, CCF<sub>3</sub>), 131.0 (C<sub>Ar</sub>-H), 129.6 (C<sub>Ar</sub>-H), 123.9 (C<sub>Ar</sub>-H), 123.1 (q, <sup>1</sup>*J*<sub>C-F</sub> = 272.9 Hz, CF<sub>3</sub>), 122.6 (q, <sup>3</sup>*J*<sub>C-F</sub> = 3.7 Hz, C<sub>Ar</sub>-H), 120.9 (C<sub>Ar</sub>-C), 114.5 (C<sub>Ar</sub>-H), 66.1 (C<sub>7</sub>), 60.0 (C<sub>4a</sub>), 44.4 (C<sub>5</sub>), 36.4 (C<sub>6</sub>), 27.7 (CH<sub>3</sub>), 27.5 (CH<sub>3</sub>). <sup>19</sup>F NMR (282 MHz, CDCl<sub>3</sub>): δ -62.7 (CF<sub>3</sub>). IR (ATR) cm<sup>-1</sup>: 2962 (NH), 2872 (C-H), 1659 (C=O), 1543 (C=N), 1275 (C=S), 1127 (C-N). MS (EI) *m/z* (%): 514 (M<sup>+</sup>, 100), 409 (52), 252 (13), 207 (15), 135 (19), 123 (37), 92 (33), 77 (64), 65 (27). HRMS: Calculated for [C<sub>23</sub>H<sub>21</sub>N<sub>4</sub>OSF<sub>6</sub>]<sup>+</sup>: 515.1340 [(M+H)<sup>+</sup>]; found: 515.1348. The ee was determined by HPLC using a Chiralcel OD-3 column [*n*-hexane/*i*PrOH (95:05)]; flow rate 0.70 mL/min; τ<sub>major</sub> = 6.344 min, τ<sub>minor</sub> = 15.231 min (>99% ee). [α]<sub>D</sub><sup>20</sup>: -63.6 (*c* = 1.0, CH<sub>2</sub>Cl<sub>2</sub>). M.p. (CH<sub>2</sub>Cl<sub>2</sub>): 184-186 °C.

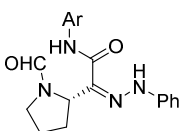

**(S,Z)-N-[3,5-bis(trifluoromethyl)phenyl]-2-(1-formylpyrrolidin-2-yl)-2-(2-phenylhydrazono)acetamide (7a').** PIFA (309 mg, 0.696 mmol) was added to a cooled (0 °C) solution of (*Z*)-2-[3,5-bis(trifluoromethyl)phenyl]-4-(2-phenylhydrazono)-1-thioxohexahydropyrrolo[1,2-c]pyrimidin-3(4H)-one **7a** (113 mg, 0.232 mmol, >99% ee) in CH<sub>3</sub>CN/H<sub>2</sub>O (0.9/0.2 mL). The reaction was allowed to stir at room temperature for 10 min and then the mixture was diluted with CH<sub>2</sub>Cl<sub>2</sub>, washed with saturated NaHCO<sub>3</sub> solution and water, dried over Na<sub>2</sub>SO<sub>4</sub> and concentrated *in vacuo*. The crude product was used for the next step without further purification, in this case affording 108 mg of **7a'** (0.23 mmol, 99%) as an orange solid. <sup>1</sup>H NMR (300 MHz, CDCl<sub>3</sub>): δ 12.84 (s, 1H, NNH), 11.74 (s, 1H, NHAr), 8.27 (s, 3H, C<sub>Ar</sub>-H + CHO), 7.64 (s, 1H, C<sub>Ar</sub>-H), 7.35 (appt t, *J* = 7.5 Hz, 2H, C<sub>Ar</sub>-H), 7.20 (d, *J* = 7.5 Hz, 2H, C<sub>Ar</sub>-H), 7.03 (appt t, *J* = 7.5 Hz, 1H, C<sub>Ar</sub>-H), 5.23 (dd, *J* = 8.3, 2.7 Hz, 1H, C<sub>2</sub>-H), 3.85-3.63 (m, 2H, C<sub>5</sub>-H), 2.70-2.61 (m, 1H, C<sub>3</sub>-H<sub>a</sub>), 2.54-2.42 (m, 1H, C<sub>4</sub>-H<sub>a</sub>), 2.25-2.14 (m, 1H, C<sub>3</sub>-H<sub>b</sub>), 2.14-2.04 (m, 1H, C<sub>4</sub>-H<sub>b</sub>). <sup>13</sup>C NMR (75 MHz, CDCl<sub>3</sub>): δ 163.6 (CO), 162.7 (CHO), 143.3 (CN), 140.1 (C<sub>Ar</sub>-C), 132.3 (q, <sup>2</sup>*J*<sub>C-F</sub> = 33.4 Hz, CCF<sub>3</sub>), 129.6 (C<sub>Ar</sub>-H), 128.1 (C<sub>Ar</sub>-C), 123.2 (q, <sup>1</sup>*J*<sub>C-F</sub> = 272.7 Hz, CF<sub>3</sub>),

122.7 (C<sub>Ar</sub>-H), 120.3 (C<sub>Ar</sub>-H), 117.5 (C<sub>Ar</sub>-H), 114.0 (C<sub>Ar</sub>-H), 55.0 (C<sub>2</sub>), 46.5 (C<sub>5</sub>), 30.4 (C<sub>3</sub>), 24.0 (C<sub>4</sub>). <sup>19</sup>F NMR (282MHz, CDCl<sub>3</sub>): δ -62.9 (CF<sub>3</sub>). IR (ATR) cm<sup>-1</sup>: 2962 (NH), 1635 (C=O), 1534 (C=N), 1123 (C-N). HRMS: Calculated for [C<sub>21</sub>H<sub>19</sub>N<sub>4</sub>O<sub>2</sub>F<sub>6</sub>]<sup>+</sup>: 473.1412 [(M+H)<sup>+</sup>]; found: 473.1411. The ee was determined by HPLC using a Chiralpak AD-H column [*n*-hexane/*i*PrOH (95:05)]; flow rate 1.00 mL/min; τ<sub>major</sub> = 5.106 min, τ<sub>minor</sub> = 5.663 min (>99% ee). [α]<sub>D</sub><sup>20</sup>: -261.9 (*c* = 0.57, CH<sub>2</sub>Cl<sub>2</sub>). M.p. (CH<sub>2</sub>Cl<sub>2</sub>): 140-142 °C.

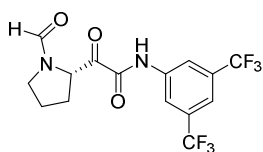

**(S)-N-[3,5-bis(trifluoromethyl)phenyl]-2-(1-formylpyrrolidin-2-yl)-2-oxoacetamide (8a).**

Following *GP-H*, **8a** (43.2 mg, 0.11 mmol) was isolated by FC (petroleum ether/EtOAc gradient from 8:2 to 1:1) in 67% yield as a white foam starting from (*S,Z*)-2-[3,5-bis(trifluoromethyl)phenyl]-4-(2-phenylhydrazono)-1-thioxohexahydropyrrolo[1,2-*c*]pyrimidin-3(4*H*)-one **7a** (80 mg, 0.164 mmol, >99% ee) and PIFA (218 mg, 0.492 mmol + 87.5 mg, 0.197 mmol) in CH<sub>3</sub>CN/H<sub>2</sub>O (0.7/0.2 mL). <sup>1</sup>H NMR (300 MHz, CDCl<sub>3</sub>): (3.7:1 rotamer ratio, \*denotes minor rotamer resonances) δ 9.36\* (bs, 1H, NH), 9.21 (bs, 1H, NH), 8.28 (s, 1H, NCHO), 8.21\* (s, 2H, C<sub>Ar</sub>-H), 8.16 (s, 2H, C<sub>Ar</sub>-H), 8.13\* (s, 1H, NCHO), 7.69\* (s, 1H, C<sub>Ar</sub>-H), 7.65 (s, 1H, C<sub>Ar</sub>-H), 5.42\* (dd, *J* = 9.2, 4.2 Hz, 1H, C<sub>2</sub>-H), 5.33-5.23 (m, 1H, C<sub>2</sub>-H), 3.78-3.69 (m, 2H, C<sub>5</sub>-H), 2.64-2.56\* (m, 1H, C<sub>3</sub>-H<sub>a</sub>), 2.55-2.40 (m, 1H, C<sub>3</sub>-H<sub>a</sub>), 2.15-1.95 (m, 3H, C<sub>3</sub>-H<sub>b</sub> + C<sub>4</sub>-H). <sup>13</sup>C NMR (75 MHz, CDCl<sub>3</sub>): δ 194.8\* (CO), 194.1 (CO), 161.9\* (NCHO), 160.7 (NCHO), 157.8 (CONH), 157.3\* (CONH), 138.0 (C<sub>Ar</sub>-C), 137.8\* (C<sub>Ar</sub>-C), 133.6\* (q, <sup>2</sup>*J*<sub>C-F</sub> = 33.4 Hz, CCF<sub>3</sub>), 132.7 (q, <sup>2</sup>*J*<sub>C-F</sub> = 33.8 Hz, 2 × CCF<sub>3</sub>), 123.1 (q, <sup>1</sup>*J*<sub>C-F</sub> = 272.8 Hz, CF<sub>3</sub>), 119.9 (q, <sup>3</sup>*J*<sub>C-F</sub> = 3.8 Hz, C<sub>Ar</sub>-H), 118.7 (q, <sup>3</sup>*J*<sub>C-F</sub> = 3.8 Hz, C<sub>Ar</sub>-H), 61.0\* (C<sub>2</sub>), 58.5 (C<sub>2</sub>), 46.7 (C<sub>5</sub>), 44.4\* (C<sub>5</sub>), 29.3\* (C<sub>3</sub>), 28.9 (C<sub>3</sub>), 24.7 (C<sub>4</sub>), 22.8\* (C<sub>4</sub>). <sup>19</sup>F NMR (282MHz, CDCl<sub>3</sub>): δ -63.1 (CF<sub>3</sub>). IR (ATR) cm<sup>-1</sup>: 2961 (NH), 2886 (C-H), 1653 (C=O), 1126 (C-N). MS (EI) *m/z* (%): 255 (56), 207 (17), 98 (100), 83 (12), 69 (31). HRMS: Calculated for [C<sub>15</sub>H<sub>13</sub>N<sub>2</sub>O<sub>3</sub>F<sub>6</sub>]<sup>+</sup>: 383.0830 [(M+H)<sup>+</sup>]; found: 383.0833. The ee was determined by HPLC using a Chiralpak AD-H column [*n*-hexane/*i*PrOH (90:10)]; flow rate 1.00 mL/min; τ<sub>major</sub> = 6.548 min, τ<sub>minor</sub> = 5.993 min (99% ee). [α]<sub>D</sub><sup>20</sup>: -40.7 (*c* = 1.0, CH<sub>2</sub>Cl<sub>2</sub>).

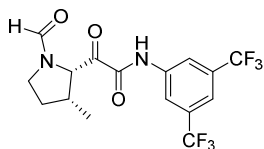

**(S)-N-[3,5-bis(trifluoromethyl)phenyl]-2-[(2*S*,3*R*)-1-formyl-3-methylpyrrolidin-2-yl]-2-oxoacetamide (8b).**

Following *GP-H*, **8b** (17.2 mg, 0.043 mmol) was isolated by FC (petroleum ether/EtOAc gradient from 8:2 to 1:1) in 60% yield as a yellow foam starting from (4*aS*,5*R,Z*)-2-[3,5-bis(trifluoromethyl)phenyl]-5-methyl-4-(2-phenylhydrazono)-1-thioxohexahydropyrrolo[1,2-*c*]pyrimidin-3(4*H*)-one **7d** (36.3 mg, 0.073 mmol, 96% ee) and PIFA (96.4 mg, 0.22 mmol + 38.6 mg, 0.087 mmol) in CH<sub>3</sub>CN/H<sub>2</sub>O (0.4/0.1 mL). <sup>1</sup>H NMR (300 MHz, CDCl<sub>3</sub>): (7.0:1 diastereoisomer ratio, \*denotes minor diastereoisomer resonances) δ 9.17 (bs, 1H, NH), 8.20 (s, 1H, NCHO), 8.15 (s, 2H, C<sub>Ar</sub>-H), 7.64 (s, 1H, C<sub>Ar</sub>-H), 4.75 (d, *J* = 7.0 Hz, 1H, C<sub>2</sub>-H), 3.82-3.70 (m, 2H, C<sub>5</sub>-H), 2.58-2.42 (m, 1H, C<sub>3</sub>-H), 2.28-2.13 (m, 1H, C<sub>4</sub>-H<sub>a</sub>), 1.82-1.65 (m, 1H, C<sub>4</sub>-H<sub>b</sub>), 1.33\* (d, *J* = 7.0 Hz, 3H, CH<sub>3</sub>), 1.27 (d, *J* = 7.0 Hz, 3H, CH<sub>3</sub>). <sup>13</sup>C NMR (75 MHz, CDCl<sub>3</sub>): δ 195.2 (CO), 160.8 (NCHO), 158.1 (CONH), 138.1 (C<sub>Ar</sub>-C), 137.7\* (C<sub>Ar</sub>-C), 132.7 (q, <sup>2</sup>*J*<sub>C-F</sub> = 33.6 Hz, CCF<sub>3</sub>), 123.0 (q, <sup>1</sup>*J*<sub>C-F</sub> = 273.1 Hz, CF<sub>3</sub>), 119.9 (C<sub>Ar</sub>-H), 118.7 (q, <sup>3</sup>*J*<sub>C-F</sub> = 3.6 Hz, C<sub>Ar</sub>-H), 62.9\* (C<sub>2</sub>), 60.6 (C<sub>2</sub>), 45.7 (C<sub>5</sub>), 43.7\* (C<sub>5</sub>), 38.1\* (C<sub>3</sub>), 36.7 (C<sub>3</sub>), 32.4 (C<sub>4</sub>), 30.8\* (C<sub>4</sub>), 15.2\* (CH<sub>3</sub>), 14.9 (CH<sub>3</sub>). <sup>19</sup>F NMR (282MHz, CDCl<sub>3</sub>): δ -63.1 (CF<sub>3</sub>). IR (ATR) cm<sup>-1</sup>: 2973 (NH), 2887 (C-H), 1652 (C=O), 1126 (C-N). MS (EI) *m/z* (%): 255 (68), 236 (30), 207 (29), 112 (100), 83 (39), 69 (37). HRMS: Calculated for [C<sub>16</sub>H<sub>15</sub>N<sub>2</sub>O<sub>3</sub>F<sub>6</sub>]<sup>+</sup>: 397.0987 [(M+H)<sup>+</sup>]; found: 397.0988; The ee was determined by HPLC using a Chiralpak AD-H column [*n*-hexane/*i*PrOH (95:05)]; flow rate 1.00 mL/min; τ<sub>major</sub> = 10.119 min, τ<sub>minor</sub> = 9.370 min (For the major diastereoisomer: 96% ee). [α]<sub>D</sub><sup>20</sup>: -15.7 (*c* = 0.85, CH<sub>2</sub>Cl<sub>2</sub>).

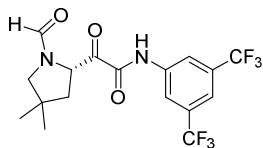

**(S)-N-[3,5-bis(trifluoromethyl)phenyl]-2-(1-formyl-4,4-dimethylpyrrolidin-2-yl)-2-oxoacetamide (8c).**

Following *GP-H*, **8c** (50.1 mg, 0.122 mmol) was isolated by FC (petroleum ether/EtOAc gradient from 8:2 to 1:1) in 63% yield as a yellow foam starting from (*S,Z*)-2-[3,5-bis(trifluoromethyl)phenyl]-6,6-dimethyl-4-(2-phenylhydrazono)-1-thioxohexahydropyrrolo[1,2-*c*]pyrimidin-3(4*H*)-one **7e** (100 mg, 0.194 mmol, >99% ee) and PIFA (258 mg, 0.582 mmol + 103 mg, 0.233 mmol) in CH<sub>3</sub>CN/H<sub>2</sub>O (0.8/0.2 mL). <sup>1</sup>H NMR (300 MHz, CDCl<sub>3</sub>): (3.0:1 rotamer ratio, \*denotes minor rotamer resonances) δ 9.21 (bs, 1H, NH), 9.11\* (bs, 1H, NH), 8.27 (s, 1H, NCHO), 8.22\* (s, 1H, NCHO), 8.21\* (s, 2H, C<sub>Ar</sub>-H), 8.17 (s, 2H, C<sub>Ar</sub>-H), 7.70\* (s, 1H, C<sub>Ar</sub>-H), 7.66 (s, 1H, C<sub>Ar</sub>-H), 5.46-5.38\* (m, 1H, C<sub>2</sub>-H), 5.33-5.24 (m, 1H, C<sub>2</sub>-H), 3.78-3.68 (m, 2H, C<sub>5</sub>-H), 2.52-2.41 (m, 1H, C<sub>3</sub>-H<sub>a</sub>), 2.07-2.04 (m, 1H, C<sub>3</sub>-H<sub>b</sub>), 1.91\* (s, 6H, C(CH<sub>3</sub>)<sub>2</sub>), 1.34 (s, 6H, C(CH<sub>3</sub>)<sub>2</sub>). <sup>13</sup>C NMR (75 MHz, CDCl<sub>3</sub>): δ 194.8\* (CO), 194.0 (CO), 169.9\* (NCHO), 161.7\* (CONH), 160.7 (NCHO), 157.7 (CONH), 138.0 (C<sub>Ar</sub>-C), 137.7\* (C<sub>Ar</sub>-C), 132.7 (q, <sup>2</sup>*J*<sub>C-F</sub> = 33.7 Hz, CCF<sub>3</sub>), 123.1 (q, <sup>1</sup>*J*<sub>C-F</sub> =

272.7 Hz, CF<sub>3</sub>), 119.9 (q, <sup>3</sup>J<sub>C-F</sub> = 3.3 Hz, C<sub>Ar</sub>-H), 118.7 (q, <sup>3</sup>J<sub>C-F</sub> = 4.0 Hz, C<sub>Ar</sub>-H), 60.9\* (C<sub>2</sub>), 58.5 (C<sub>2</sub>), 51.5 (C<sub>4</sub>), 46.7 (C<sub>5</sub>), 44.4\* (C<sub>5</sub>), 28.9 (C(CH<sub>3</sub>)<sub>2</sub>), 24.7 (C<sub>3</sub>), 24.6\* (C(CH<sub>3</sub>)<sub>2</sub>), 22.8\* (C<sub>3</sub>). <sup>19</sup>F NMR (282 MHz, CDCl<sub>3</sub>): δ -63.1 (CF<sub>3</sub>). IR (ATR) cm<sup>-1</sup>: 2965 (NH), 2877 (C-H), 1658 (C=O), 1128 (C-N). MS (EI) *m/z* (%): 380 (17), 281 (16), 255 (72), 236 (41), 207 (31), 186 (15), 152 (57), 108 (100), 81 (23), 69 (25). The ee was determined by HPLC using a Chiralpak AD-H column [*n*-hexane/*i*PrOH (90:10)]; flow rate 1.00 mL/min; τ<sub>major</sub> = 6.502 min, τ<sub>minor</sub> = 5.960 min (90% ee). [α]<sub>D</sub><sup>20</sup>: -27.5 (*c* = 1.0, CH<sub>2</sub>Cl<sub>2</sub>).

### 3.6. Chemical manipulation of adducts **4** (Scheme 4)

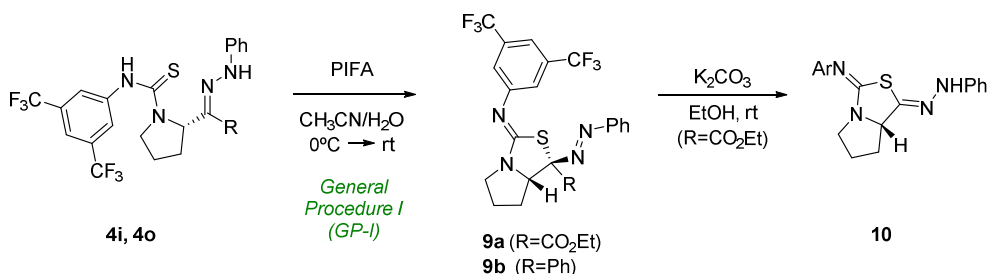

**Scheme SI-8.** Derivatization of adducts **4i** and **4o**

**General Procedure I (GP-I).** To a stirred solution of hydrazone (0.43 mmol, 1.0 eq.) in CH<sub>3</sub>CN/H<sub>2</sub>O (1.4/0.25 mL) at 0 °C, was added [bis(trifluoroacetoxy)iodo]benzene (0.86 mmol, 2.0 eq.). The reaction mixture was allowed to stir at room temperature for 15 min. Then, the mixture was diluted with CH<sub>2</sub>Cl<sub>2</sub>, washed with saturated NaHCO<sub>3</sub> aqueous solution and water, dried over Na<sub>2</sub>SO<sub>4</sub> and concentrated *in vacuo*. The crude product was purified by flash column chromatography on silica gel.

**Ethyl (1*S*,7*aS*,*Z*)-3-[[3,5-bis(trifluoromethyl)phenyl]imino]-1-[(*E*)-phenyldiazenyl]tetrahydro-1*H*,3*H*-pyrrolo[1,2-*c*]thiazole-1-carboxylate (**9a**).** Following *GP-I*, **9a** (72.8 mg, 0.137 mmol) was isolated by FC (petroleum ether/EtOAc gradient from 19:1 to 7:3) after 15min in 73% yield as an orange solid starting from (*S*)-ethyl-(*Z*)-2-{1-[(3,5-bis(trifluoromethyl)phenyl)carbamothioyl]pyrrolidin-2-yl}-2-(2-phenylhydrazono)acetate **4i** (100 mg, 0.188 mmol, >99% ee) and PIFA (166.5 mg, 0.376 mmol) in CH<sub>3</sub>CN/H<sub>2</sub>O (0.7/0.12 mL). *R*<sub>f</sub>: 0.7 (hexanes/EtOAc 8:2). <sup>1</sup>H NMR (300 MHz, CDCl<sub>3</sub>): δ 7.82-7.69 (m, 2H, C<sub>Ar</sub>-H), 7.60-7.50 (m, 4H, C<sub>Ar</sub>-H), 7.46 (s, 2H, C<sub>Ar</sub>-H), 5.04 (appt t, *J* = 6.8 Hz, 1H, C<sub>2</sub>-H), 4.43-4.16 (m, 2H, CH<sub>2</sub>CH<sub>3</sub>), 3.77-3.58 (m, 1H, C<sub>5</sub>-H<sub>a</sub>), 3.56-3.36 (m, 1H, C<sub>5</sub>-H<sub>b</sub>), 2.26-1.88 (m, 4H, C<sub>3</sub>-H + C<sub>4</sub>-H), 1.28 (t, *J* = 7.1 Hz, 3H, CH<sub>2</sub>CH<sub>3</sub>). <sup>13</sup>C NMR (75 MHz, CDCl<sub>3</sub>): δ 166.7 (COO), 155.1 (C<sub>Ar</sub>-C), 152.5 (C<sub>Ar</sub>-C), 150.8 (CN), 132.6 (C<sub>Ar</sub>-H), 132.2 (q, <sup>2</sup>J<sub>C-F</sub> = 33.0 Hz, CCF<sub>3</sub>), 129.5 (C<sub>Ar</sub>-H), 123.6 (q, <sup>1</sup>J<sub>C-F</sub> = 272.8 Hz, CF<sub>3</sub>), 123.3 (C<sub>Ar</sub>-H), 122.7 (q, <sup>3</sup>J<sub>C-F</sub> = 3.4 Hz, C<sub>Ar</sub>-H), 116.5 (q, <sup>3</sup>J<sub>C-F</sub> = 3.8 Hz, C<sub>Ar</sub>-H), 88.5 (CCOO), 70.2 (C<sub>2</sub>), 63.0 (CH<sub>2</sub>CH<sub>3</sub>), 46.1 (C<sub>5</sub>), 27.6 (C<sub>4</sub>), 24.5 (C<sub>3</sub>), 14.2 (CH<sub>2</sub>CH<sub>3</sub>). <sup>19</sup>F NMR (282 MHz, CDCl<sub>3</sub>): δ -62.9 (CF<sub>3</sub>). IR (ATR) cm<sup>-1</sup>: 2887 (C-H), 1737 (C=O), 1602 (C=N), 1125 (C-N). MS (EI) *m/z* (%): 502 (29), 429 (58), 387 (10), 194 (26), 158 (17), 121 (100), 77 (6). HRMS: Calculated for [C<sub>23</sub>H<sub>21</sub>N<sub>4</sub>O<sub>2</sub>SF<sub>6</sub>]<sup>+</sup>: 531.1289 [(M+H)<sup>+</sup>]; found: 531.1312. The ee was determined by HPLC using a Chiralcel OD-3 column [*n*-hexane/*i*PrOH (98:02)]; flow rate 1.00 mL/min; τ<sub>major</sub> = 5.707 min, τ<sub>minor</sub> = 5.306 min (>99% ee). [α]<sub>D</sub><sup>20</sup>: -275.9 (*c* = 1.0, CH<sub>2</sub>Cl<sub>2</sub>). M.p. (CH<sub>2</sub>Cl<sub>2</sub>): 127-129 °C.

**(1*R*,7*aS*,*Z*)-*N*-[3,5-bis(trifluoromethyl)phenyl]-1-phenyl-1-[(*E*)-phenyldiazenyl]tetrahydro-1*H*,3*H*-pyrrolo[1,2-*c*]thiazole-3-imine (**9b**).** Following *GP-I*, **9b** (37.6 mg, 0.07 mmol) was isolated by FC (petroleum ether/EtOAc gradient from 19:1 to 7:3) after 15min in 90% yield as an orange solid starting from (*S*)-(*Z*)-*N*-[3,5-bis(trifluoromethyl)phenyl]-2-[phenyl(2-phenylhydrazono)pyrrolidine]-1-carbothioamide **4o** (41.8 mg, 0.078 mmol, 90% ee) and PIFA (69.1 mg, 0.156 mmol) in CH<sub>3</sub>CN/H<sub>2</sub>O (1.2/0.24 mL). *R*<sub>f</sub>: 0.57 (hexanes/EtOAc 8:2). <sup>1</sup>H NMR (300 MHz, CDCl<sub>3</sub>): δ 7.90-7.80 (m, 2H, C<sub>Ar</sub>-H), 7.69-7.60 (m, 4H, C<sub>Ar</sub>-H), 7.60-7.50 (m, 4H, C<sub>Ar</sub>-H), 7.49-7.33 (m, 3H, C<sub>Ar</sub>-H), 5.04 (appt t, *J* = 7.1 Hz, 1H, C<sub>7a</sub>-H), 3.63-3.49 (m, 1H, C<sub>5</sub>-H<sub>a</sub>), 3.49-3.34 (m, 1H, C<sub>5</sub>-H<sub>b</sub>), 2.48-2.29 (m, 1H, C<sub>6</sub>-H<sub>a</sub>), 2.26-1.85 (m, 3H, C<sub>6</sub>-H<sub>b</sub> + C<sub>7</sub>-H) <sup>13</sup>C NMR (75 MHz, CDCl<sub>3</sub>): δ 156.8 (C<sub>Ar</sub>-C), 152.7 (C<sub>Ar</sub>-C), 151.0 (C<sub>3</sub>), 136.8 (C<sub>Ar</sub>-H), 132.0 (C<sub>Ar</sub>-H), 131.9 (q, <sup>2</sup>J<sub>C-F</sub> = 32.9 Hz, CCF<sub>3</sub>), 129.4 (C<sub>Ar</sub>-H), 128.9 (C<sub>Ar</sub>-H), 127.5 (C<sub>Ar</sub>-H), 123.6 (q, <sup>1</sup>J<sub>C-F</sub> = 272.7 Hz, CF<sub>3</sub>), 123.2 (C<sub>Ar</sub>-H), 122.8 (q, <sup>3</sup>J<sub>C-F</sub> = 2.9 Hz, C<sub>Ar</sub>-H), 116.3-115.9 (m, C<sub>Ar</sub>-H), 91.4 (C<sub>1</sub>), 74.5 (C<sub>7a</sub>), 45.7 (C<sub>5</sub>), 27.2 (C<sub>6</sub>), 23.8 (C<sub>7</sub>). <sup>19</sup>F NMR (282

MHz, CDCl<sub>3</sub>):  $\delta$  -62.8 (CF<sub>3</sub>). IR (ATR) cm<sup>-1</sup>: 2877 (C-H), 1595 (C=N), 1125 (C-N). MS (EI)  $m/z$  (%): 502 (73), 398 (24), 330 (100), 213 (12), 115 (24), 77 (85), 69 (24). HRMS: Calculated for [C<sub>26</sub>H<sub>21</sub>N<sub>4</sub>SF<sub>6</sub>]<sup>+</sup>: 535.1391 [(M+H)<sup>+</sup>]; found: 535.1400. The ee was determined by HPLC using a Chiralcel OD-3 column [*n*-hexane/*i*PrOH (90:10)]; flow rate 1.00 mL/min;  $\tau_{\text{major}} = 4.544$  min,  $\tau_{\text{minor}} = 5.694$  min (90% ee).  $[\alpha]_{\text{D}}^{20}$ : -193.9 ( $c = 1.0$ , CH<sub>2</sub>Cl<sub>2</sub>). M.p. (CH<sub>2</sub>Cl<sub>2</sub>): 50-52 °C.

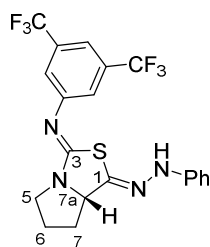

**(S,1Z,3Z)-N-[3,5-bis(trifluoromethyl)phenyl]-1-(2-phenylhydrazono)tetrahydro-1H,3H-pyrrolo[1,2-c]thiazol-3-imine (10).** K<sub>2</sub>CO<sub>3</sub> (14.7 mg, 0.107 mmol) is added to a cooled solution (0 °C) of ethyl (1S,7a*S*,*E/Z*)-3-[[3,5-bis(trifluoromethyl)phenyl]imino]-1-[(*E*)-phenyldiazenyl]tetrahydro-1H,3H-pyrrolo[1,2-c]thiazole-1-carboxylate **9a** (56.5 mg, 0.107 mmol, >99% ee) in ethanol (0.9 mL). The reaction was allowed to stir at room temperature for 6 hours and then quenched with NH<sub>4</sub>Cl. The crude product was extracted with CH<sub>2</sub>Cl<sub>2</sub> (3 x 2 mL). The combined organic layers were dried over Na<sub>2</sub>SO<sub>4</sub>, filtered and concentrated *in vacuo*.

The residue was subjected to flash column chromatography on silica gel to afford 43.4 mg of **10** (0.095 mmol, 88%) as an orange solid. R<sub>f</sub>: 0.81 (hexanes/EtOAc 8:2). <sup>1</sup>H NMR (300 MHz, CDCl<sub>3</sub>):  $\delta$  7.60 (s, 1H, C<sub>Ar</sub>-H), 7.41 (s, 2H, C<sub>Ar</sub>-H), 7.31-7.19 (m, 2H, C<sub>Ar</sub>-H), 6.99 (d,  $J = 7.7$  Hz, 2H, C<sub>Ar</sub>-H), 6.91 (appt t,  $J = 7.3$  Hz, 1H, C<sub>Ar</sub>-H), 6.45 (bs, 1H, NH), 4.85 (dd,  $J = 9.9, 5.9$  Hz, 1H, C<sub>7a</sub>-H), 3.98-3.83 (m, 1H, C<sub>5</sub>-H<sub>a</sub>), 3.60-3.46 (m, 1H, C<sub>5</sub>-H<sub>b</sub>), 2.46-2.14 (m, 3H, C<sub>6</sub>-H<sub>a</sub> + C<sub>7</sub>-H), 1.98-1.80 (m, 1H, C<sub>6</sub>-H<sub>b</sub>). <sup>13</sup>C NMR (75 MHz, CDCl<sub>3</sub>):  $\delta$  154.8 (C<sub>3</sub>), 152.2 (C<sub>1</sub>), 144.7 (C<sub>Ar</sub>-C), 137.6 (C<sub>Ar</sub>-C), 132.5 (q, <sup>2</sup> $J_{\text{C-F}} = 33.2$  Hz, CCF<sub>3</sub>), 129.4 (C<sub>Ar</sub>-H), 123.4 (q, <sup>1</sup> $J_{\text{C-F}} = 272.8$  Hz, CF<sub>3</sub>), 122.5 (q, <sup>3</sup> $J_{\text{C-F}} = 3.8$  Hz, C<sub>Ar</sub>-H), 121.2 (C<sub>Ar</sub>-H), 117.1 (q, <sup>3</sup> $J_{\text{C-F}} = 4.0$  Hz, C<sub>Ar</sub>-H), 113.5 (C<sub>Ar</sub>-H), 69.1 (C<sub>7a</sub>), 47.9 (C<sub>5</sub>), 30.4 (C<sub>7</sub>), 26.4 (C<sub>6</sub>). <sup>19</sup>F NMR (282 MHz, CDCl<sub>3</sub>):  $\delta$  -62.9 (CF<sub>3</sub>). IR (ATR) cm<sup>-1</sup>: 2989 (NH), 1601 (C=N), 1121 (C-N). MS (EI)  $m/z$  (%): 458 (96), 353 (10), 271 (100), 252 (30), 213 (35), 202 (10), 163 (19), 143 (11), 93 (47), 77 (52), 69 (22). HRMS: Calculated for [C<sub>20</sub>H<sub>17</sub>N<sub>4</sub>SF<sub>6</sub>]<sup>+</sup>: 459.1078 [(M+H)<sup>+</sup>]; found: 459.1088. The ee was determined by HPLC using a Chiralpak ID-3 column [*n*-hexane/*i*PrOH (98:02)]; flow rate 0.70 mL/min;  $\tau_{\text{major}} = 8.310$  min,  $\tau_{\text{minor}} = 11.439$  min (>99% ee).  $[\alpha]_{\text{D}}^{20}$ : +253.5 ( $c = 0.46$ , CH<sub>2</sub>Cl<sub>2</sub>). M.p. (CH<sub>2</sub>Cl<sub>2</sub>): 86-88 °C.

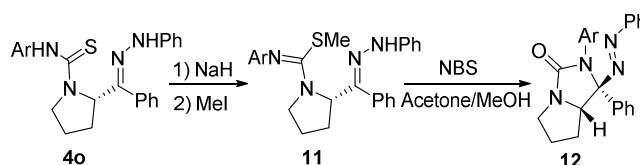

**Scheme SI-9.** Derivatization of adducts **4o**

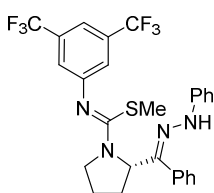

**Methyl-(S,Z)-N-[3,5-bis(trifluoromethyl)phenyl]-2-[(E)-phenyl(2-phenylhydrazineylidene)methyl]pyrrolidine-1-carbimidothioate (11).**

To a solution of **4o** (100 mg, 0.186 mmol, 90% ee) in CH<sub>2</sub>Cl<sub>2</sub> (2.0 mL) at 0 °C, sodium hydride (9.0 mg, 0.224 mmol, 60% in mineral oil) was added. After being stirred for 30 min at 0 °C, methyl iodide (12.8  $\mu$ L, 0.205 mmol) was added and the reaction was stirred 3 hours at room temperature. Then, the reaction mixture was washed with water and brine, and extracted with EtOAc (3 x 2 mL). The organic layer was dried over Na<sub>2</sub>SO<sub>4</sub>, filtered and concentrated *in vacuo*. The residue was purified by flash column chromatography on silica gel to afford 76.3 mg of **11** (0.139 mmol, 75%) as a yellow solid. R<sub>f</sub>: 0.89 (hexanes/EtOAc 8:2). <sup>1</sup>H NMR (300 MHz, CDCl<sub>3</sub>):  $\delta$  7.59-7.44 (m, 3H, C<sub>Ar</sub>-H), 7.44-7.34 (m, 6H, C<sub>Ar</sub>-H + NH), 7.32-7.20 (m, 2H, C<sub>Ar</sub>-H), 7.05-6.99 (m, 2H, C<sub>Ar</sub>-H), 6.86 (appt t,  $J = 7.3$  Hz, 1H, C<sub>Ar</sub>-H), 5.23-5.14 (m, 1H, C<sub>2</sub>-H), 3.97-3.85 (m, 1H, C<sub>5</sub>-H<sub>a</sub>), 3.81-3.67 (m, 1H, C<sub>5</sub>-H<sub>b</sub>), 2.25-1.98 (m, 4H, C<sub>3</sub>-H + C<sub>4</sub>-H), 1.89 (s, 3H, SCH<sub>3</sub>). <sup>13</sup>C NMR (75 MHz, CDCl<sub>3</sub>):  $\delta$  155.5 (NCN), 151.4 (C<sub>Ar</sub>-C), 145.2 (C<sub>Ar</sub>-C), 145.0 (CNN), 132.6 (C<sub>Ar</sub>-C), 131.9 (q, <sup>2</sup> $J_{\text{C-F}} = 32.7$  Hz, CCF<sub>3</sub>), 129.8 (C<sub>Ar</sub>-H), 129.6 (C<sub>Ar</sub>-H), 129.3 (C<sub>Ar</sub>-H), 128.0 (C<sub>Ar</sub>-H), 123.7 (q, <sup>1</sup> $J_{\text{C-F}} = 272.8$  Hz, CF<sub>3</sub>), 121.9 (C<sub>Ar</sub>-H), 120.1 (C<sub>Ar</sub>-H), 114.1 (q, <sup>3</sup> $J_{\text{C-F}} = 4.0$  Hz, C<sub>Ar</sub>-H), 112.7 (C<sub>Ar</sub>-H), 64.9 (C<sub>2</sub>), 49.9 (C<sub>5</sub>), 30.2 (C<sub>3</sub>), 22.8 (C<sub>4</sub>), 16.0 (SCH<sub>3</sub>). <sup>19</sup>F NMR (282 MHz, CDCl<sub>3</sub>):  $\delta$  -62.9 (CF<sub>3</sub>). IR (ATR) cm<sup>-1</sup>: 2976 (NH), 2875 (C-H), 1601 (C=N), 1124 (C-N). MS (EI)  $m/z$  (%): 502 (71), 398 (25), 330 (100), 207 (15), 215 (24), 77 (81), 69 (23). HRMS: Calculated for [C<sub>27</sub>H<sub>25</sub>N<sub>4</sub>SF<sub>6</sub>]<sup>+</sup>: 551.1704 [(M+H)<sup>+</sup>]; found: 551.1711. The ee was determined by HPLC using a Chiralcel OD-3 column [*n*-hexane/*i*PrOH (99:01)]; flow rate 0.70 mL/min;  $\tau_{\text{major}} = 10.461$  min,  $\tau_{\text{minor}} = 11.362$  min (88% ee).  $[\alpha]_{\text{D}}^{20}$ : -93.3 ( $c = 1.0$ , CH<sub>2</sub>Cl<sub>2</sub>). M.p. (CH<sub>2</sub>Cl<sub>2</sub>): 82-84 °C.

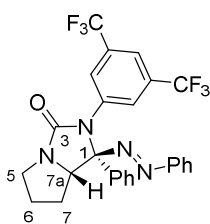

**(1*S*,7*aS*,*E*)-2-[3,5-bis(trifluoromethyl)phenyl]-1-phenyl-1-(phenyldiazenyl)hexahydro-3*H*-pyrrolo[1,2-*c*]imidazol-3-one (12).**

Powered *N*-bromosuccinimide (52.3 mg, 0.291 mmol) was added at 0 °C to an stirred 50% acetone-MeOH (0.2 mL-0.2 mL) solution of **11** (40.0 mg, 0.073 mmol, 88% ee). The reaction mixture was allowed to stir at room temperature for 30 min and water was added. The crude product was extracted with CH<sub>2</sub>Cl<sub>2</sub> (3 x 1 mL). The organic layer was dried over Na<sub>2</sub>SO<sub>4</sub>, filtered and concentrated *in vacuo*. The residue was purified by flash column chromatography on silica gel to afford 22.0 mg of **12** (0.042 mmol, 58%) as an orange oil. R<sub>f</sub>: 0.43 (hexanes/EtOAc 8:2). <sup>1</sup>H NMR (300 MHz, CDCl<sub>3</sub>): δ 7.85-7.79 (m, 2H, C<sub>Ar</sub>-H), 7.79-7.73 (m, 2H, C<sub>Ar</sub>-H), 7.56-7.49 (m, 3H, C<sub>Ar</sub>-H), 7.48-7.38 (m, 3H, C<sub>Ar</sub>-H), 7.35 (bs, 3H, C<sub>Ar</sub>-H), 4.43 (appt t, *J* = 6.8 Hz, 1H, C<sub>7a</sub>-H), 3.66 (ddd, *J* = 11.0, 7.8, 5.1 Hz, 1H, C<sub>5</sub>-H<sub>a</sub>), 3.23-3.10 (m, 1H, C<sub>5</sub>-H<sub>b</sub>), 1.90-1.70 (m, 3H, C<sub>6</sub>-H<sub>a</sub> + C<sub>7</sub>-H), 1.59-1.47 (m, 1H, C<sub>6</sub>-H<sub>b</sub>). <sup>13</sup>C NMR (75 MHz, CDCl<sub>3</sub>): δ 159.2 (C<sub>3</sub>), 151.0 (C<sub>Ar</sub>-C), 139.2 (C<sub>Ar</sub>-C), 132.3 (C<sub>Ar</sub>-H), 131.2 (q, <sup>2</sup>*J*<sub>C-F</sub> = 33.3 Hz, CCF<sub>3</sub>), 129.5 (C<sub>Ar</sub>-H), 129.5 (C<sub>Ar</sub>-H), 129.1 (C<sub>Ar</sub>-H), 127.1 (C<sub>Ar</sub>-H), 123.2 (q, <sup>1</sup>*J*<sub>C-F</sub> = 273.2 Hz, CF<sub>3</sub>), 123.1 (C<sub>Ar</sub>-H), 122.5 (C<sub>Ar</sub>-H), 116.4 (q, <sup>3</sup>*J*<sub>C-F</sub> = 4.0 Hz, C<sub>Ar</sub>-H), 91.2 (C<sub>1</sub>), 71.0 (C<sub>7a</sub>), 45.4 (C<sub>5</sub>), 25.9 (C<sub>7</sub>), 24.2 (C<sub>6</sub>). <sup>19</sup>F NMR (282 MHz, CDCl<sub>3</sub>): δ -63.2 (CF<sub>3</sub>). IR (ATR) cm<sup>-1</sup>: 1722 (C=O), 1128 (C-N). MS (EI) *m/z* (%): 412 (100), 316 (28), 253 (14). HRMS: Calculated for [C<sub>26</sub>H<sub>21</sub>N<sub>4</sub>OF<sub>6</sub>]<sup>+</sup>: 519.1620 [(M+H)<sup>+</sup>]; found: 519.1612. The ee was determined by HPLC using a Chiralpak AD-H column [*n*-hexane/*i*PrOH (98:02)]; flow rate 1.00 mL/min; τ<sub>major</sub> = 7.107 min, τ<sub>minor</sub> = 7.926 min (88% ee). [α]<sub>D</sub><sup>20</sup>: -113.7 (*c* = 0.66, CH<sub>2</sub>Cl<sub>2</sub>).



#### 4.1. X-Ray Analysis of Compound 4m

Crystal Data for C<sub>22</sub>H<sub>20</sub>F<sub>6</sub>N<sub>4</sub>OS (*M* = 502.48 g/mol) (**4m**): triclinic, space group P1 (no. 1), *a* = 12.62193(18) Å, *b* = 13.55916(19) Å, *c* = 20.6596(3) Å,  $\alpha$  = 92.8838(11)°,  $\beta$  = 91.5768(11)°,  $\gamma$  = 94.1281(11)°, *V* = 3520.38(8) Å<sup>3</sup>, *Z* = 6, *T* = 149.99 (10) K,  $\mu$ (Cu K $\alpha$ ) = 1.866 mm<sup>-1</sup>, *D*<sub>calc</sub> = 1.422 g/cm<sup>3</sup>, 72604 reflections measured (6.544° ≤ 2 $\theta$  ≤ 139.998°), 25823 unique (*R*<sub>int</sub> = 0.0426, *R*<sub>sigma</sub> = 0.0555) which were used in all calculations. The final *R*<sub>1</sub> was 0.0550 (*I* ≥ 2 $\sigma$ (*I*)) and *wR*<sub>2</sub> was 0.1532 (all data).

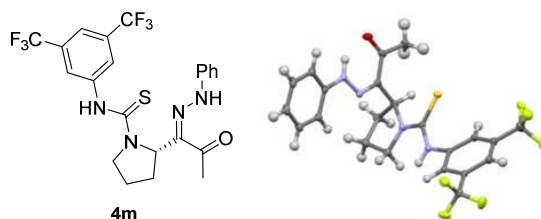

Figure SI-1. ORTEP diagram for compound (*S,Z*)-**4m**

Table SI-4 Crystal data and structure refinement for **4m**.

|                                                              |                                                                               |
|--------------------------------------------------------------|-------------------------------------------------------------------------------|
| Identification code                                          | <b>NZ906</b>                                                                  |
| Empirical formula                                            | C <sub>22</sub> H <sub>20</sub> F <sub>6</sub> N <sub>4</sub> OS              |
| Formula weight                                               | 502.48                                                                        |
| Temperature/K                                                | 149.99(10)                                                                    |
| Crystal system                                               | triclinic                                                                     |
| Space group                                                  | P1                                                                            |
| <i>a</i> /Å                                                  | 12.62193(18)                                                                  |
| <i>b</i> /Å                                                  | 13.55916(19)                                                                  |
| <i>c</i> /Å                                                  | 20.6596(3)                                                                    |
| $\alpha$ /°                                                  | 92.8838(11)                                                                   |
| $\beta$ /°                                                   | 91.5768(11)                                                                   |
| $\gamma$ /°                                                  | 94.1281(11)                                                                   |
| Volume/Å <sup>3</sup>                                        | 3520.38(8)                                                                    |
| <i>Z</i>                                                     | 6                                                                             |
| $\rho$ <sub>calc</sub> /cm <sup>3</sup>                      | 1.422                                                                         |
| $\mu$ /mm <sup>-1</sup>                                      | 1.866                                                                         |
| <i>F</i> (000)                                               | 1548.0                                                                        |
| Crystal size/mm <sup>3</sup>                                 | 0.699 × 0.186 × 0.058                                                         |
| Radiation                                                    | CuK $\alpha$ ( $\lambda$ = 1.54184)                                           |
| 2 $\theta$ range for data collection/°                       | 6.544 to 139.998                                                              |
| Index ranges                                                 | -15 ≤ <i>h</i> ≤ 15, -16 ≤ <i>k</i> ≤ 16, -25 ≤ <i>l</i> ≤ 24                 |
| Reflections collected                                        | 72604                                                                         |
| Independent reflections                                      | 25823 [ <i>R</i> <sub>int</sub> = 0.0426, <i>R</i> <sub>sigma</sub> = 0.0555] |
| Data/restraints/parameters                                   | 25823/363/2075                                                                |
| Goodness-of-fit on <i>F</i> <sup>2</sup>                     | 1.066                                                                         |
| Final <i>R</i> indexes [ <i>I</i> ≥ 2 $\sigma$ ( <i>I</i> )] | <i>R</i> <sub>1</sub> = 0.0550, <i>wR</i> <sub>2</sub> = 0.1507               |
| Final <i>R</i> indexes [all data]                            | <i>R</i> <sub>1</sub> = 0.0567, <i>wR</i> <sub>2</sub> = 0.1532               |
| Largest diff. peak/hole / e Å <sup>-3</sup>                  | 0.41/-0.36                                                                    |
| Flack parameter                                              | -0.013(13)                                                                    |



**Table SI-5** Fractional Atomic Coordinates ( $\times 10^4$ ) and Equivalent Isotropic Displacement Parameters ( $\text{\AA}^2 \times 10^3$ ) for **4m**.  $U_{\text{eq}}$  is defined as 1/3 of the trace of the orthogonalised  $U_{\text{II}}$  tensor.

| Atom | x          | y         | z          | U(eq)    |
|------|------------|-----------|------------|----------|
| S1A  | 12961.8(9) | 8792.0(8) | -785.2(6)  | 38.0(2)  |
| F10A | 11100(3)   | 8889(3)   | 2370(2)    | 60.2(9)  |
| F11A | 11321(4)   | 7339(3)   | 2373.7(19) | 64.5(10) |
| F12A | 12434(3)   | 8386(4)   | 2873.0(18) | 73.7(12) |
| O1A  | 11075(4)   | 9497(3)   | -2561(2)   | 52.9(10) |
| N1A  | 11895(3)   | 7073(3)   | -1066(2)   | 34.0(8)  |
| N2A  | 12208(3)   | 7412(3)   | 23(2)      | 33.6(8)  |
| N3A  | 10335(3)   | 8049(3)   | -1691(2)   | 37.0(8)  |
| N4A  | 9649(3)    | 8719(3)   | -1813(2)   | 38.2(9)  |
| C1A  | 11975(4)   | 7286(4)   | -1763(2)   | 39(1)    |
| C2A  | 11650(5)   | 6281(4)   | -2100(3)   | 47.9(12) |
| C3A  | 10876(5)   | 5786(4)   | -1649(3)   | 49.1(12) |
| C4A  | 11315(4)   | 6117(4)   | -973(3)    | 41.2(11) |
| C5A  | 12321(4)   | 7698(3)   | -605(2)    | 32.7(9)  |
| C6A  | 12632(4)   | 7926(3)   | 593(2)     | 33.5(9)  |
| C7A  | 13620(4)   | 8450(4)   | 622(3)     | 43.9(12) |
| C8A  | 13996(5)   | 8925(5)   | 1195(3)    | 53.4(14) |
| C9A  | 13418(5)   | 8864(4)   | 1760(3)    | 48.4(12) |
| C10A | 12454(4)   | 8310(3)   | 1736(2)    | 36.6(10) |
| C11A | 12049(4)   | 7849(3)   | 1154(2)    | 31.8(9)  |
| C12A | 15036(6)   | 9509(6)   | 1229(3)    | 80(3)    |
| C13A | 11828(4)   | 8228(4)   | 2332(3)    | 42.9(11) |
| C14A | 11278(4)   | 8103(4)   | -1942(2)   | 35.8(10) |
| C15A | 11662(5)   | 8870(4)   | -2380(3)   | 44.3(12) |
| C16A | 12788(5)   | 8906(6)   | -2591(3)   | 59.0(16) |
| C17A | 8659(4)    | 8659(4)   | -1526(3)   | 39(1)    |
| C18A | 8039(5)    | 9465(4)   | -1582(3)   | 46.6(12) |
| C19A | 7054(5)    | 9431(5)   | -1318(4)   | 55.8(15) |
| C20A | 6666(5)    | 8626(5)   | -995(4)    | 57.0(15) |
| C21A | 7282(5)    | 7824(4)   | -944(3)    | 49.3(13) |
| C22A | 8282(4)    | 7836(4)   | -1199(3)   | 41.9(11) |
| F1A  | 15006(15)  | 10435(11) | 1524(13)   | 90(5)    |
| F4A  | 15456(12)  | 9669(15)  | 641(6)     | 63(3)    |
| F7A  | 15791(8)   | 9048(10)  | 1570(8)    | 56(3)    |
| F3A  | 15114(15)  | 10157(15) | 753(9)     | 79(4)    |
| F6A  | 15860(14)  | 8908(15)  | 1148(16)   | 114(6)   |
| F9A  | 15181(14)  | 10120(14) | 1788(7)    | 76(4)    |
| F2A  | 14910(14)  | 10461(13) | 1083(13)   | 88(4)    |
| F5A  | 15684(12)  | 9197(15)  | 724(9)     | 76(4)    |
| F8A  | 15572(12)  | 9508(15)  | 1754(8)    | 72(4)    |
| S1F  | -330.2(8)  | 1773.9(8) | 9084.1(6)  | 32.7(2)  |
| O1F  | -1810(3)   | 2664(3)   | 11000(2)   | 47.7(9)  |
| N1F  | -117(3)    | 207(3)    | 9773.0(19) | 32.1(8)  |

|      |            |           |             |          |
|------|------------|-----------|-------------|----------|
| N2F  | 1269(3)    | 560(3)    | 9119(2)     | 32.9(8)  |
| N3F  | -170(3)    | 1343(3)   | 10919.7(19) | 34.1(8)  |
| N4F  | 15(3)      | 2087(3)   | 11359(2)    | 37.1(8)  |
| C1F  | -1139(4)   | 383(4)    | 10075(2)    | 35.4(10) |
| C2F  | -1406(4)   | -604(4)   | 10395(3)    | 44.4(12) |
| C3F  | -327(4)    | -974(4)   | 10572(3)    | 45.6(12) |
| C4F  | 377(4)     | -658(4)   | 10018(3)    | 40.0(11) |
| C5F  | 307(3)     | 802(3)    | 9335(2)     | 29.9(8)  |
| C6F  | 1968(4)    | 1121(3)   | 8731(2)     | 30.4(9)  |
| C7F  | 3041(4)    | 1173(3)   | 8913(2)     | 34.3(9)  |
| C8F  | 3785(4)    | 1678(4)   | 8546(3)     | 42.1(11) |
| C9F  | 3467(5)    | 2151(4)   | 8007(3)     | 46.7(12) |
| C10F | 2401(4)    | 2102(4)   | 7833(3)     | 40.6(11) |
| C11F | 1640(4)    | 1570(3)   | 8181(2)     | 34.4(9)  |
| C12F | 4942(5)    | 1748(5)   | 8762(4)     | 60.8(17) |
| C13F | 2031(6)    | 2630(5)   | 7258(3)     | 54.6(14) |
| C14F | -1034(4)   | 1270(3)   | 10550(2)    | 32.1(9)  |
| C15F | -1881(4)   | 1966(4)   | 10599(3)    | 40.1(11) |
| C16F | -2841(5)   | 1803(5)   | 10146(4)    | 58.5(15) |
| C17F | 928(4)     | 2132(4)   | 11762(2)    | 39.1(10) |
| C18F | 1185(5)    | 2991(5)   | 12141(3)    | 47.9(13) |
| C19F | 2076(6)    | 3047(6)   | 12557(3)    | 61.9(19) |
| C20F | 2713(5)    | 2268(6)   | 12587(3)    | 57.8(17) |
| C21F | 2461(5)    | 1422(5)   | 12208(3)    | 55.2(15) |
| C22F | 1571(4)    | 1331(4)   | 11790(3)    | 43.1(11) |
| F7F  | 1850(50)   | 3470(40)  | 7370(30)    | 95(17)   |
| F11F | 2570(30)   | 2460(40)  | 6693(18)    | 91(11)   |
| F9F  | 1030(30)   | 2150(30)  | 6920(20)    | 54(8)    |
| F6F  | 5250(4)    | 2647(4)   | 9051(4)     | 78(2)    |
| F2F  | 5166(4)    | 1097(7)   | 9202(4)     | 71.3(18) |
| F4F  | 5582(4)    | 1613(7)   | 8287(3)     | 83(2)    |
| F8F  | 1511(8)    | 3432(6)   | 7445(4)     | 60.4(18) |
| F10F | 1406(12)   | 2071(8)   | 6874(5)     | 79(3)    |
| F12F | 2858(6)    | 2990(7)   | 6923(4)     | 75(3)    |
| F5F  | 5390(30)   | 2540(30)  | 8570(30)    | 91(13)   |
| F1F  | 5100(40)   | 1560(40)  | 9300(20)    | 76(12)   |
| F3F  | 5300(30)   | 960(30)   | 8215(19)    | 79(11)   |
| S1C  | -1131.4(8) | 4740.3(8) | 5793.3(5)   | 32.7(2)  |
| O1C  | -4779(3)   | 3487(3)   | 5325.4(18)  | 39.8(7)  |
| N1C  | -2116(3)   | 6169(3)   | 5244.4(19)  | 31.1(7)  |
| N2C  | -375(3)    | 6109(3)   | 4986.1(19)  | 32.1(8)  |
| N3C  | -3669(3)   | 4911(3)   | 4591.7(19)  | 32.5(8)  |
| N4C  | -4178(3)   | 4162(3)   | 4239(2)     | 34.4(8)  |
| C1C  | -3100(3)   | 5844(3)   | 5564(2)     | 31.9(9)  |
| C2C  | -3742(4)   | 6757(4)   | 5534(3)     | 40.8(11) |
| C3C  | -3417(4)   | 7221(4)   | 4907(3)     | 42.5(11) |

|      |            |           |            |          |
|------|------------|-----------|------------|----------|
| C4C  | -2237(4)   | 7047(4)   | 4865(3)    | 38.5(10) |
| C5C  | -1212(3)   | 5721(3)   | 5320(2)    | 29.2(8)  |
| C6C  | 669(4)     | 5791(3)   | 4971(2)    | 30.0(9)  |
| C7C  | 1162(4)    | 5803(3)   | 4374(2)    | 35.2(9)  |
| C8C  | 2219(4)    | 5577(3)   | 4340(3)    | 39.7(11) |
| C9C  | 2784(4)    | 5336(4)   | 4882(3)    | 41.1(11) |
| C10C | 2286(4)    | 5337(3)   | 5473(3)    | 36.6(10) |
| C11C | 1231(4)    | 5561(3)   | 5525(2)    | 31.6(9)  |
| C12C | 2751(5)    | 5624(4)   | 3707(3)    | 59.5(17) |
| C13C | 2920(4)    | 5137(4)   | 6059(3)    | 49.1(13) |
| C14C | -3666(3)   | 4932(3)   | 5223(2)    | 29.7(8)  |
| C15C | -4226(3)   | 4178(3)   | 5605(2)    | 31.6(9)  |
| C16C | -4092(4)   | 4231(4)   | 6327(2)    | 40.3(10) |
| C17C | -4165(3)   | 4141(4)   | 3565(2)    | 33.9(9)  |
| C18C | -4492(4)   | 3245(4)   | 3226(3)    | 41.5(11) |
| C19C | -4495(4)   | 3181(5)   | 2559(3)    | 50.2(13) |
| C20C | -4183(4)   | 4005(5)   | 2216(3)    | 50.1(13) |
| C21C | -3872(5)   | 4882(5)   | 2549(3)    | 48.1(12) |
| C22C | -3855(4)   | 4971(4)   | 3225(3)    | 42.4(11) |
| F1C  | 1987(7)    | 5372(9)   | 3189(4)    | 58(2)    |
| F3C  | 3039(10)   | 6551(6)   | 3566(4)    | 80(3)    |
| F5C  | 3479(9)    | 5038(10)  | 3588(6)    | 65(3)    |
| F8C  | 2409(14)   | 5186(17)  | 6615(7)    | 46(3)    |
| F10C | 3811(9)    | 5733(13)  | 6130(8)    | 60(4)    |
| F12C | 3269(19)   | 4215(11)  | 5965(11)   | 65(4)    |
| F2C  | 2199(12)   | 5783(13)  | 3204(6)    | 69(4)    |
| F4C  | 3677(12)   | 6276(10)  | 3783(7)    | 83(4)    |
| F6C  | 3273(10)   | 4748(8)   | 3619(7)    | 42(3)    |
| F7C  | 2280(20)   | 4929(19)  | 6560(11)   | 49(5)    |
| F9C  | 3578(17)   | 5980(12)  | 6285(10)   | 65(4)    |
| F11C | 3527(18)   | 4367(15)  | 6049(15)   | 61(5)    |
| S1D  | -2937.6(9) | 1154.8(8) | 4181.7(6)  | 34.5(2)  |
| F00I | -2037(3)   | 1846(3)   | 7830.7(16) | 62.3(10) |
| F00O | -841(3)    | 2676(3)   | 7323.6(19) | 65.4(10) |
| F007 | -942(3)    | 1093(3)   | 7251.7(17) | 53.0(8)  |
| O1D  | -571(3)    | 306(2)    | 2521.1(17) | 37.2(7)  |
| N1D  | -1828(3)   | 2823(3)   | 3947.3(18) | 28.5(7)  |
| N2D  | -2197(3)   | 2649(3)   | 5015.9(19) | 30.4(7)  |
| N3D  | -156(3)    | 1824(3)   | 3520.3(18) | 30.0(7)  |
| N4D  | 604(3)     | 1198(3)   | 3464.8(19) | 30.2(7)  |
| C1D  | -1810(3)   | 2485(3)   | 3261(2)    | 29.9(9)  |
| C2D  | -1516(4)   | 3454(4)   | 2928(2)    | 35.0(9)  |
| C3D  | -778(4)    | 4047(4)   | 3429(2)    | 36.6(10) |
| C4D  | -1247(4)   | 3800(3)   | 4081(2)    | 32.9(9)  |
| C5D  | -2292(3)   | 2268(3)   | 4394(2)    | 27.5(8)  |
| C6D  | -2574(3)   | 2199(3)   | 5579(2)    | 29.6(8)  |

|      |            |           |            |          |
|------|------------|-----------|------------|----------|
| C7D  | -1908(4)   | 2257(3)   | 6127(2)    | 31.1(9)  |
| C8D  | -2274(4)   | 1873(3)   | 6697(2)    | 34.1(9)  |
| C9D  | -3287(4)   | 1439(4)   | 6736(2)    | 39.2(10) |
| C10D | -3951(4)   | 1384(4)   | 6186(3)    | 39.9(10) |
| C11D | -3602(4)   | 1756(4)   | 5606(2)    | 34.6(9)  |
| C12D | -1525(4)   | 1881(4)   | 7275(3)    | 41.6(11) |
| C13D | -5057(5)   | 967(4)    | 6214(3)    | 54.5(14) |
| C14D | -1018(3)   | 1707(3)   | 3149(2)    | 28.1(8)  |
| C15D | -1230(4)   | 911(3)    | 2639(2)    | 31.4(9)  |
| C16D | -2273(4)   | 852(4)    | 2262(3)    | 44.0(11) |
| C17D | 1558(3)    | 1390(3)   | 3828(2)    | 31.8(9)  |
| C18D | 2289(4)    | 670(4)    | 3807(2)    | 37.5(10) |
| C19D | 3268(4)    | 856(5)    | 4129(3)    | 46.1(12) |
| C20D | 3521(4)    | 1744(4)   | 4469(3)    | 47.6(13) |
| C21D | 2784(4)    | 2452(4)   | 4503(3)    | 44.1(12) |
| C22D | 1798(4)    | 2286(4)   | 4182(3)    | 36.6(10) |
| F212 | -5804(9)   | 1579(14)  | 6062(14)   | 85(4)    |
| F213 | -5257(16)  | 216(16)   | 5764(11)   | 87(5)    |
| F214 | -5274(13)  | 608(17)   | 6791(6)    | 70(4)    |
| F215 | -5717(13)  | 1698(11)  | 6357(16)   | 72(5)    |
| F216 | -5460(16)  | 527(19)   | 5657(6)    | 67(5)    |
| F217 | -5213(17)  | 250(20)   | 6641(14)   | 77(6)    |
| S1B  | 10322.0(9) | 8055.6(8) | 4116.1(6)  | 35.0(2)  |
| F7B  | 4918(3)    | 8200(4)   | 3871(2)    | 83.5(15) |
| F8B  | 4627(3)    | 7733(3)   | 2868(2)    | 68.2(11) |
| F9B  | 4895(3)    | 9265(3)   | 3153(2)    | 68(1)    |
| O1B  | 11468(4)   | 7487(3)   | 6306(2)    | 54.2(10) |
| N1B  | 10142(3)   | 9727(3)   | 4811.7(18) | 28.1(7)  |
| N2B  | 8810(3)    | 9358(3)   | 4052.0(19) | 32.2(8)  |
| N3B  | 9871(3)    | 8697(3)   | 5894.2(19) | 37.2(9)  |
| N4B  | 9540(4)    | 8055(3)   | 6327(2)    | 44.9(10) |
| C1B  | 11093(4)   | 9519(3)   | 5196(2)    | 31.5(9)  |
| C2B  | 11416(4)   | 10539(3)  | 5537(2)    | 35.3(9)  |
| C3B  | 10358(4)   | 10993(4)  | 5643(2)    | 36.9(10) |
| C4B  | 9669(4)    | 10631(3)  | 5048(2)    | 31.5(9)  |
| C5B  | 9729(3)    | 9096(3)   | 4337(2)    | 29.4(8)  |
| C6B  | 8157(4)    | 8802(3)   | 3571(2)    | 32.2(9)  |
| C7B  | 8559(4)    | 8340(4)   | 3031(2)    | 38.3(10) |
| C8B  | 7846(5)    | 7846(4)   | 2571(3)    | 44.6(12) |
| C9B  | 6756(5)    | 7829(4)   | 2644(3)    | 45.9(12) |
| C10B | 6380(4)    | 8311(4)   | 3178(3)    | 41.2(11) |
| C11B | 7072(4)    | 8793(3)   | 3649(2)    | 35.7(10) |
| C12B | 8275(5)    | 7329(5)   | 1998(3)    | 61.2(17) |
| C13B | 5207(5)    | 8359(5)   | 3269(3)    | 51.5(13) |
| C14B | 10828(4)   | 8725(3)   | 5678(2)    | 37.1(10) |
| C15B | 11645(5)   | 8085(4)   | 5881(3)    | 44.3(12) |

|      |           |           |             |          |
|------|-----------|-----------|-------------|----------|
| C16B | 12705(5)  | 8160(5)   | 5568(4)     | 59.5(15) |
| C17B | 8519(5)   | 8089(4)   | 6565(2)     | 45.6(12) |
| C18B | 7886(6)   | 8846(4)   | 6436(3)     | 57.1(16) |
| C19B | 6864(6)   | 8856(5)   | 6688(4)     | 62.6(18) |
| C20B | 6495(6)   | 8126(5)   | 7081(3)     | 59.7(16) |
| C21B | 7147(6)   | 7382(5)   | 7220(3)     | 58.7(17) |
| C22B | 8146(6)   | 7346(5)   | 6960(3)     | 54.8(15) |
| F2B  | 8730(30)  | 6483(16)  | 2170(20)    | 84(3)    |
| F4B  | 8990(20)  | 7979(18)  | 1750(13)    | 73(2)    |
| F6B  | 7469(16)  | 6910(20)  | 1604(11)    | 86(2)    |
| F1B  | 8391(9)   | 6365(6)   | 2087(7)     | 84(3)    |
| F3B  | 9262(7)   | 7660(8)   | 1823(4)     | 73(2)    |
| F5B  | 7669(7)   | 7370(9)   | 1449(4)     | 86(2)    |
| S1E  | 769.6(8)  | 5404.7(8) | 10750.5(6)  | 34.6(2)  |
| F1E  | -2897(3)  | 5148(3)   | 11056.7(18) | 64.2(10) |
| F2E  | -3555(3)  | 6064(3)   | 10343(2)    | 61.3(9)  |
| F3E  | -4164(3)  | 4553(3)   | 10408(2)    | 61.5(9)  |
| O1E  | 4402(3)   | 6456(2)   | 11034.5(18) | 39.4(7)  |
| N1E  | 1783(3)   | 3802(3)   | 10444.2(18) | 28.1(7)  |
| N2E  | 211(3)    | 3885(3)   | 9891(2)     | 31.8(8)  |
| N3E  | 3447(3)   | 5038(3)   | 10084.2(19) | 29.3(7)  |
| N4E  | 4044(3)   | 5763(3)   | 9838.0(19)  | 31.6(8)  |
| C1E  | 2006(4)   | 2876(3)   | 10096(2)    | 34.1(9)  |
| C2E  | 3147(4)   | 2716(4)   | 10308(2)    | 35.8(10) |
| C3E  | 3268(4)   | 3230(3)   | 10981(2)    | 34.2(9)  |
| C4E  | 2629(3)   | 4150(3)   | 10925(2)    | 28.2(8)  |
| C5E  | 925(3)    | 4310(3)   | 10345(2)    | 29.2(8)  |
| C6E  | -789(3)   | 4240(3)   | 9709(2)     | 30.8(9)  |
| C7E  | -1496(4)  | 4538(3)   | 10171(2)    | 33.9(9)  |
| C8E  | -2479(4)  | 4822(4)   | 9961(3)     | 37.3(10) |
| C9E  | -2765(4)  | 4828(4)   | 9313(3)     | 40.3(11) |
| C10E | -2057(4)  | 4514(3)   | 8860(3)     | 38(1)    |
| C11E | -1066(4)  | 4210(3)   | 9053(2)     | 34.3(9)  |
| C12E | -3264(4)  | 5146(5)   | 10445(3)    | 46.9(12) |
| C13E | -2366(4)  | 4521(4)   | 8160(3)     | 50.6(13) |
| C14E | 3305(3)   | 5031(3)   | 10702(2)    | 27.3(8)  |
| C15E | 3792(3)   | 5774(3)   | 11193(2)    | 30.3(9)  |
| C16E | 3515(4)   | 5682(4)   | 11889(2)    | 41.7(11) |
| C17E | 4218(3)   | 5751(3)   | 9173(2)     | 31.5(9)  |
| C18E | 3982(5)   | 4920(4)   | 8759(3)     | 44.5(12) |
| C19E | 4180(5)   | 4970(5)   | 8108(3)     | 52.3(13) |
| C20E | 4601(5)   | 5838(5)   | 7860(3)     | 50.0(13) |
| C21E | 4831(4)   | 6652(4)   | 8270(3)     | 46.3(12) |
| C22E | 4647(4)   | 6619(4)   | 8924(3)     | 40.2(11) |
| F5E  | -3057(14) | 5206(11)  | 8043(5)     | 69(4)    |
| F7E  | -2887(13) | 3666(8)   | 7933(7)     | 68(3)    |

|     |           |          |          |       |
|-----|-----------|----------|----------|-------|
| F9E | -1529(9)  | 4666(15) | 7777(6)  | 69(3) |
| F4E | -2530(30) | 5461(10) | 7982(7)  | 66(6) |
| F6E | -3199(18) | 3880(20) | 7980(14) | 79(6) |
| F8E | -1585(16) | 4270(20) | 7757(9)  | 58(5) |

## 4.2. X-Ray Analysis of Compound 7a'

### Crystal structure determination of 7a'

Crystal Data for C<sub>21</sub>H<sub>18</sub>F<sub>6</sub>N<sub>4</sub>O<sub>2</sub> (*M* = 472.39 g/mol) (**7a'**): monoclinic, space group I2/a (no. 15), *a* = 23.7773(15) Å, *b* = 5.4608(4) Å, *c* = 31.7244(19) Å,  $\beta$  = 92.002(6)°, *V* = 4116.7(5) Å<sup>3</sup>, *Z* = 8, *T* = 150.01(10) K,  $\mu$ (CuK $\alpha$ ) = 1.202 mm<sup>-1</sup>, *D*<sub>calc</sub> = 1.524 g/cm<sup>3</sup>, 15208 reflections measured (7.44° ≤ 2 $\theta$  ≤ 139.94°), 3904 unique (*R*<sub>int</sub> = 0.0508, *R*<sub>sigma</sub> = 0.0374) which were used in all calculations. The final *R*<sub>1</sub> was 0.0572 (> 2 $\sigma$ (*I*)) and *wR*<sub>2</sub> was 0.1679 (all data).

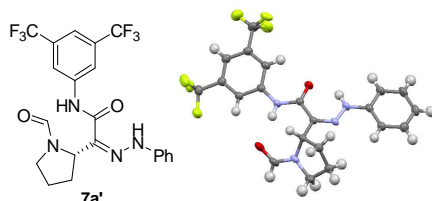

Figure SI-2. ORTEP diagram for compound (*S,Z*)-7a'

Table SI-6 Crystal data and structure refinement for 7a'.

|                                                              |                                                                              |
|--------------------------------------------------------------|------------------------------------------------------------------------------|
| Identification code                                          | a20170014_NZ1259                                                             |
| Empirical formula                                            | C <sub>21</sub> H <sub>18</sub> F <sub>6</sub> N <sub>4</sub> O <sub>2</sub> |
| Formula weight                                               | 472.39                                                                       |
| Temperature/K                                                | 150.01(10)                                                                   |
| Crystal system                                               | monoclinic                                                                   |
| Space group                                                  | I2/a                                                                         |
| <i>a</i> /Å                                                  | 23.7773(15)                                                                  |
| <i>b</i> /Å                                                  | 5.4608(4)                                                                    |
| <i>c</i> /Å                                                  | 31.7244(19)                                                                  |
| $\alpha$ /°                                                  | 90.00                                                                        |
| $\beta$ /°                                                   | 92.002(6)                                                                    |
| $\gamma$ /°                                                  | 90.00                                                                        |
| Volume/Å <sup>3</sup>                                        | 4116.7(5)                                                                    |
| <i>Z</i>                                                     | 8                                                                            |
| $\rho$ <sub>calc</sub> /g/cm <sup>3</sup>                    | 1.524                                                                        |
| $\mu$ /mm <sup>-1</sup>                                      | 1.202                                                                        |
| <i>F</i> (000)                                               | 1936.0                                                                       |
| Crystal size/mm <sup>3</sup>                                 | 0.51 × 0.047 × 0.044                                                         |
| Radiation                                                    | CuK $\alpha$ ( $\lambda$ = 1.54184)                                          |
| 2 $\theta$ range for data collection/°                       | 7.44 to 139.94                                                               |
| Index ranges                                                 | -28 ≤ <i>h</i> ≤ 28, -6 ≤ <i>k</i> ≤ 3, -36 ≤ <i>l</i> ≤ 38                  |
| Reflections collected                                        | 15208                                                                        |
| Independent reflections                                      | 3904 [ <i>R</i> <sub>int</sub> = 0.0508, <i>R</i> <sub>sigma</sub> = 0.0374] |
| Data/restraints/parameters                                   | 3904/72/354                                                                  |
| Goodness-of-fit on <i>F</i> <sup>2</sup>                     | 1.042                                                                        |
| Final <i>R</i> indexes [ <i>I</i> ≥ 2 $\sigma$ ( <i>I</i> )] | <i>R</i> <sub>1</sub> = 0.0572, <i>wR</i> <sub>2</sub> = 0.1565              |
| Final <i>R</i> indexes [all data]                            | <i>R</i> <sub>1</sub> = 0.0717, <i>wR</i> <sub>2</sub> = 0.1679              |
| Largest diff. peak/hole / e Å <sup>-3</sup>                  | 0.70/-0.29                                                                   |

**Table SI-7** Fractional Atomic Coordinates ( $\times 10^4$ ) and Equivalent Isotropic Displacement Parameters ( $\text{\AA}^2 \times 10^3$ ) for **7a'**.  $U_{\text{eq}}$  is defined as 1/3 of the trace of the orthogonalised  $U_{\text{ij}}$  tensor.

| Atom | x           | y         | z           | U(eq)    |
|------|-------------|-----------|-------------|----------|
| O001 | -3369.3(8)  | -7638(4)  | -5948.6(6)  | 31.6(4)  |
| F002 | -3504(7)    | 2600(20)  | -7513(4)    | 51(2)    |
| F003 | -2937(4)    | 70(20)    | -7788(4)    | 44(2)    |
| O004 | -4698.5(10) | -6591(5)  | -7088.4(6)  | 48.7(6)  |
| F005 | -2287(7)    | -350(30)  | -5832(6)    | 47(3)    |
| F006 | -3806(6)    | -860(30)  | -7764(3)    | 52(2)    |
| N007 | -3886.0(9)  | -5717(4)  | -6468.4(7)  | 27.9(5)  |
| N008 | -4291.5(9)  | -10807(4) | -5808.5(6)  | 25.6(5)  |
| N009 | -3818.3(9)  | -11392(4) | -5598.6(7)  | 29.3(5)  |
| N00A | -5032.6(9)  | -9600(4)  | -6668.8(7)  | 31.0(5)  |
| F00B | -1857(6)    | 840(30)   | -6400(4)    | 68(3)    |
| C00C | -3813.3(11) | -7414(5)  | -6154.3(8)  | 25.2(5)  |
| C00D | -3498.6(11) | -3951(5)  | -6592.1(8)  | 26.9(5)  |
| C00E | -4311.5(10) | -8987(5)  | -6071.4(8)  | 25.1(5)  |
| C00F | -3807.9(11) | -13351(5) | -5314.9(8)  | 27.1(5)  |
| C00G | -4895.8(10) | -8387(5)  | -6259.6(8)  | 25.6(5)  |
| C00H | -3624.1(11) | -2753(5)  | -6975.1(8)  | 28.2(6)  |
| F00I | -1774(5)    | -2820(30) | -6226(4)    | 60(3)    |
| C00J | -3273.3(11) | -945(5)   | -7115.9(8)  | 30.1(6)  |
| C00K | -3017.9(11) | -3293(5)  | -6356.8(8)  | 31.2(6)  |
| C00L | -4267.9(11) | -14863(5) | -5255.0(8)  | 29.9(6)  |
| C00M | -2681.1(12) | -1422(6)  | -6502.7(9)  | 34.4(6)  |
| C00N | -3302.0(12) | -13806(6) | -5091.7(9)  | 35.0(6)  |
| C00O | -2795.9(12) | -240(5)   | -6880.1(9)  | 34.0(6)  |
| C00P | -4216.2(12) | -16829(6) | -4984.7(9)  | 35.7(6)  |
| C00Q | -5381.2(11) | -9261(5)  | -5992.7(9)  | 31.2(6)  |
| C00R | -3253.8(13) | -15793(6) | -4824.2(9)  | 39.4(7)  |
| C00S | -3711.0(13) | -17327(6) | -4768.7(9)  | 38.2(7)  |
| C00T | -3391.1(13) | 236(6)    | -7535.7(9)  | 36.2(6)  |
| C00U | -5510.1(12) | -11841(6) | -6153.3(10) | 36.8(7)  |
| C00V | -4953.9(12) | -8529(6)  | -7038.2(9)  | 38.2(7)  |
| C00W | -5430.0(14) | -11664(6) | -6623.5(10) | 41.8(7)  |
| C00X | -2167.0(14) | -732(7)   | -6243.8(12) | 49.1(9)  |
| F2   | -3043(8)    | -500(30)  | -7818(4)    | 58(3)    |
| F4   | -3911(4)    | -230(30)  | -7690(5)    | 49(2)    |
| F5   | -3341(7)    | 2690(30)  | -7515(5)    | 51(2)    |
| F0AA | -1733(2)    | -1930(17) | -6338(3)    | 78.3(19) |
| F1AA | -2229(4)    | -1016(16) | -5834(3)    | 60.8(19) |



## 5. NMR Spectra

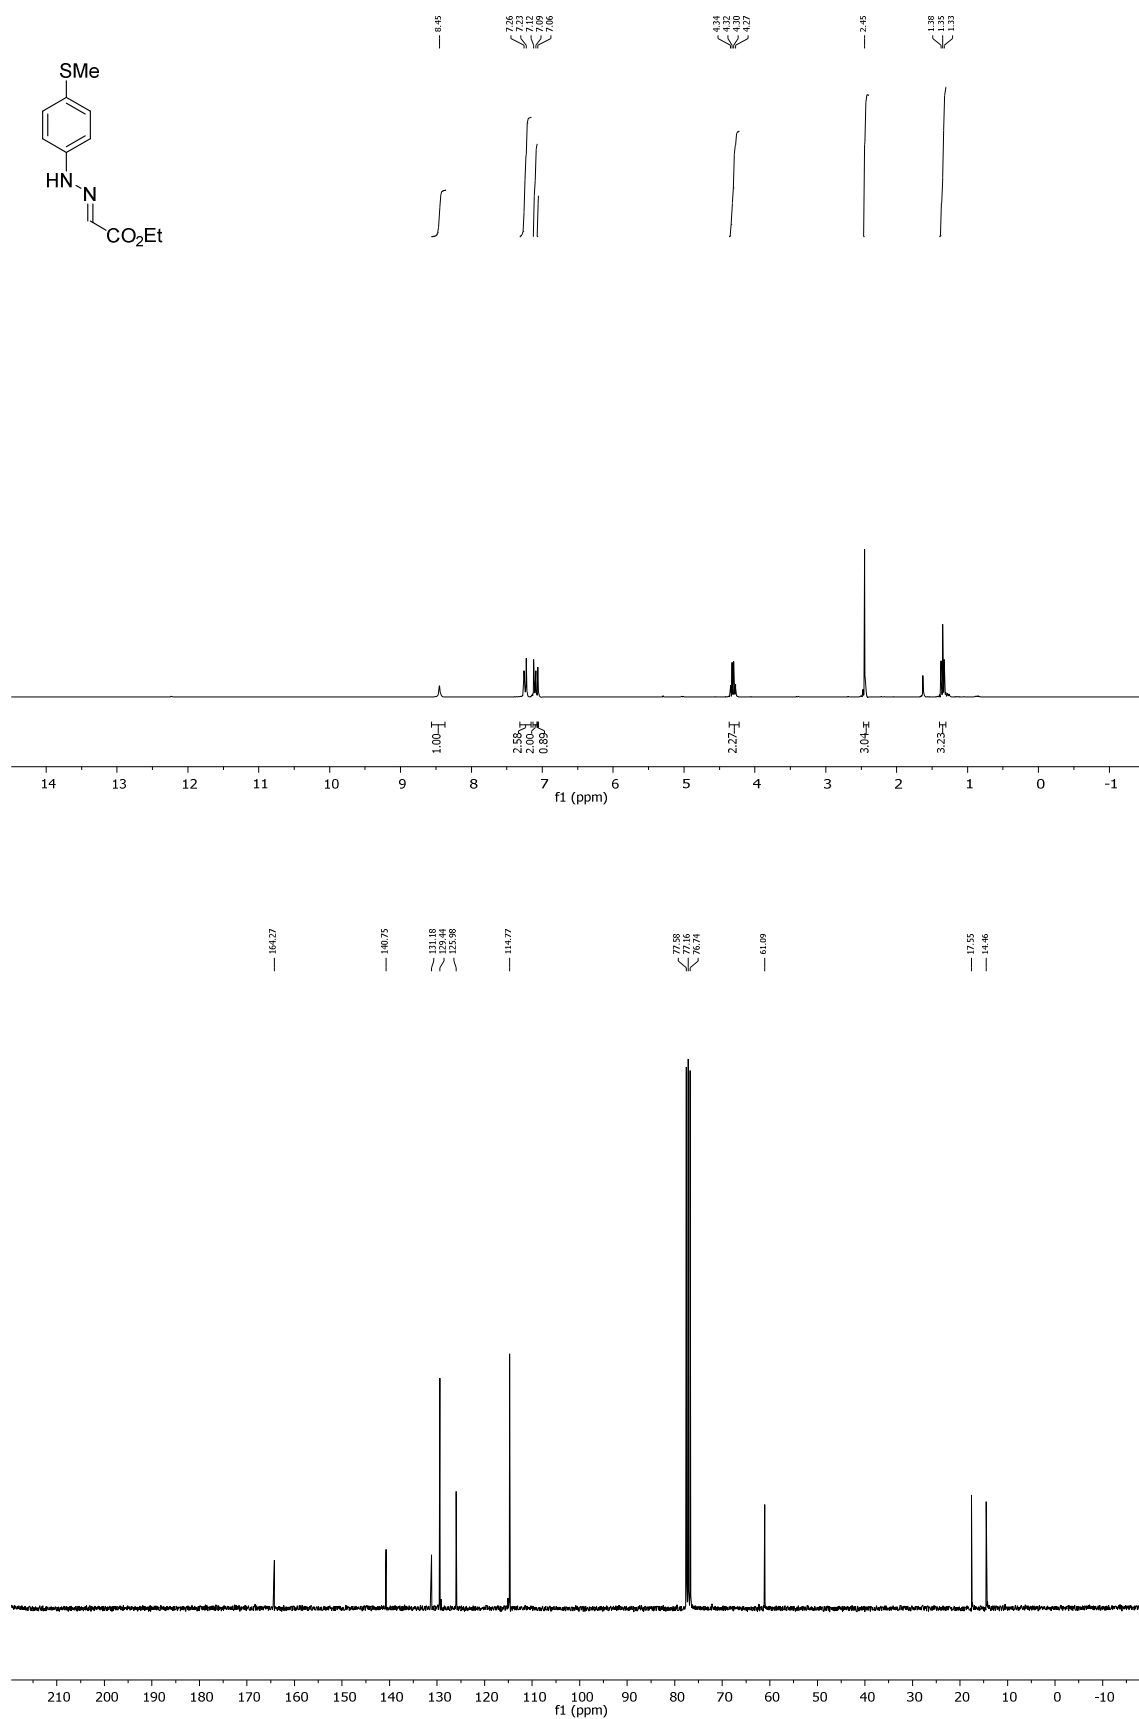

Figure SI-3. NMR spectra for compound **1b**

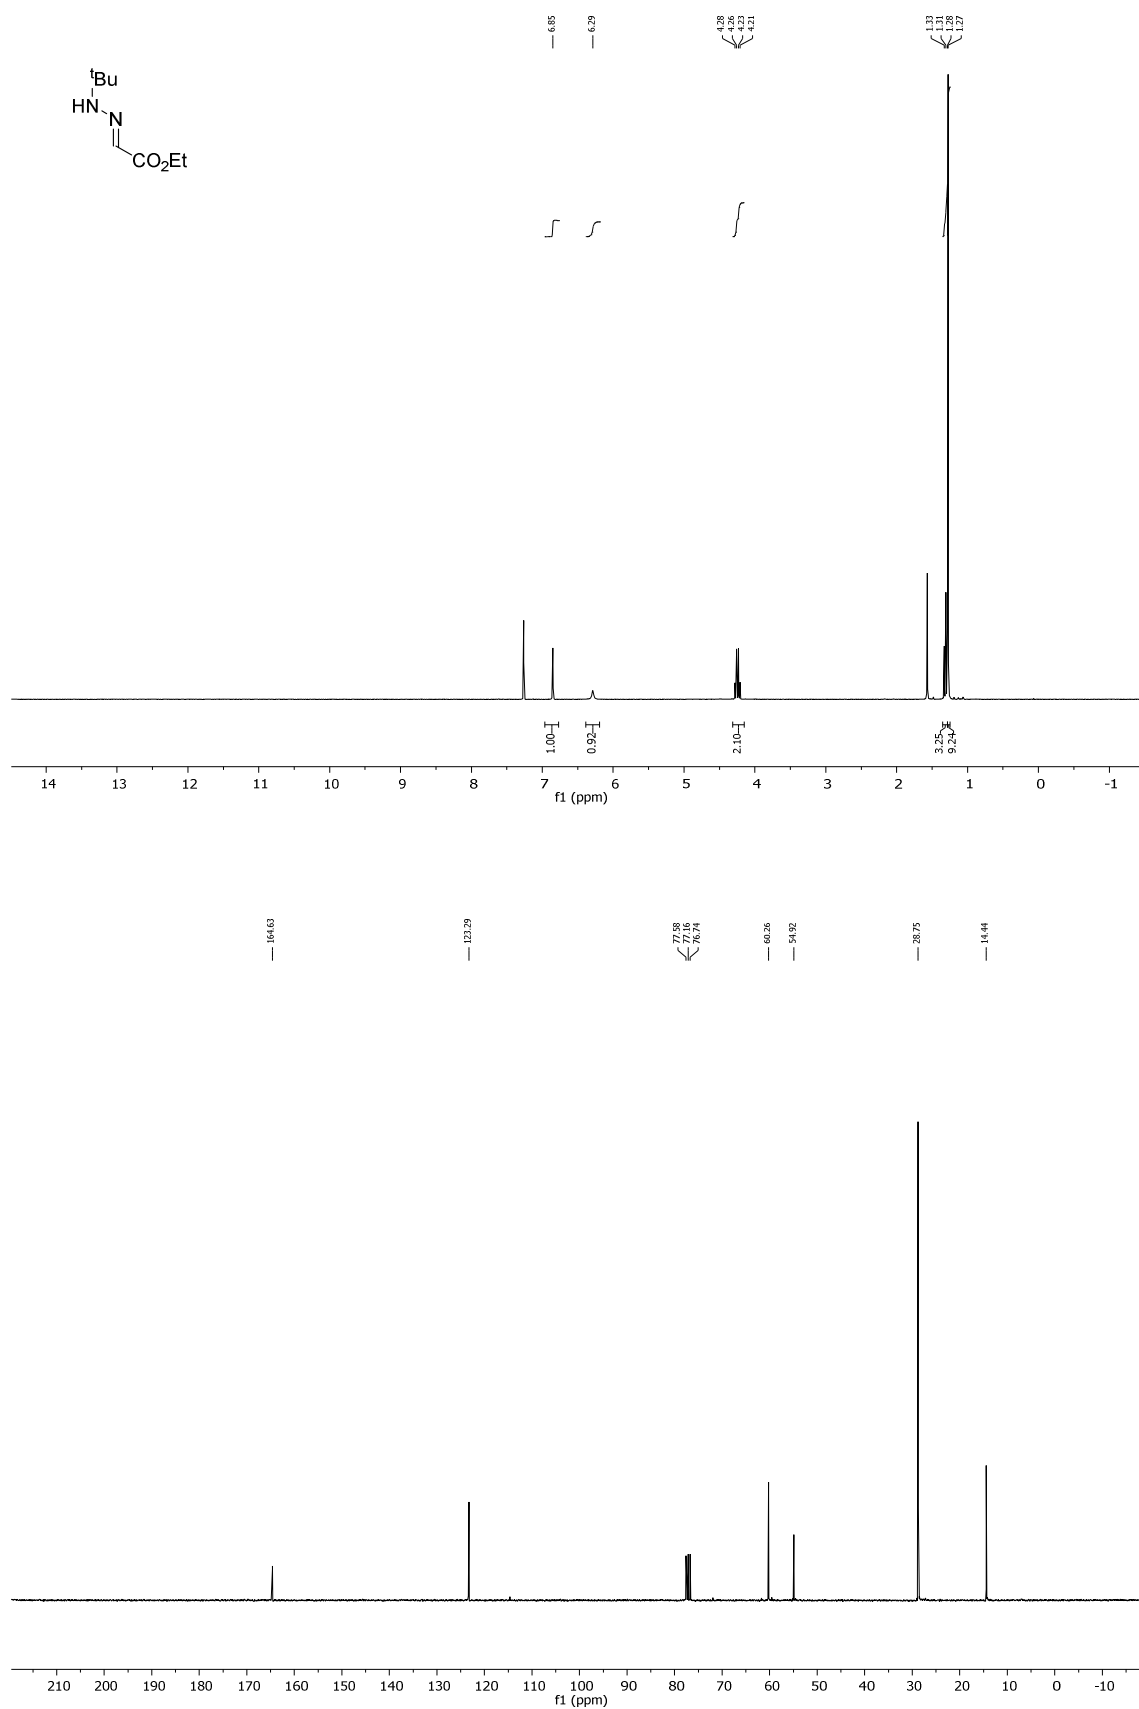

**Figure SI-4.** NMR spectra for compound **1e**

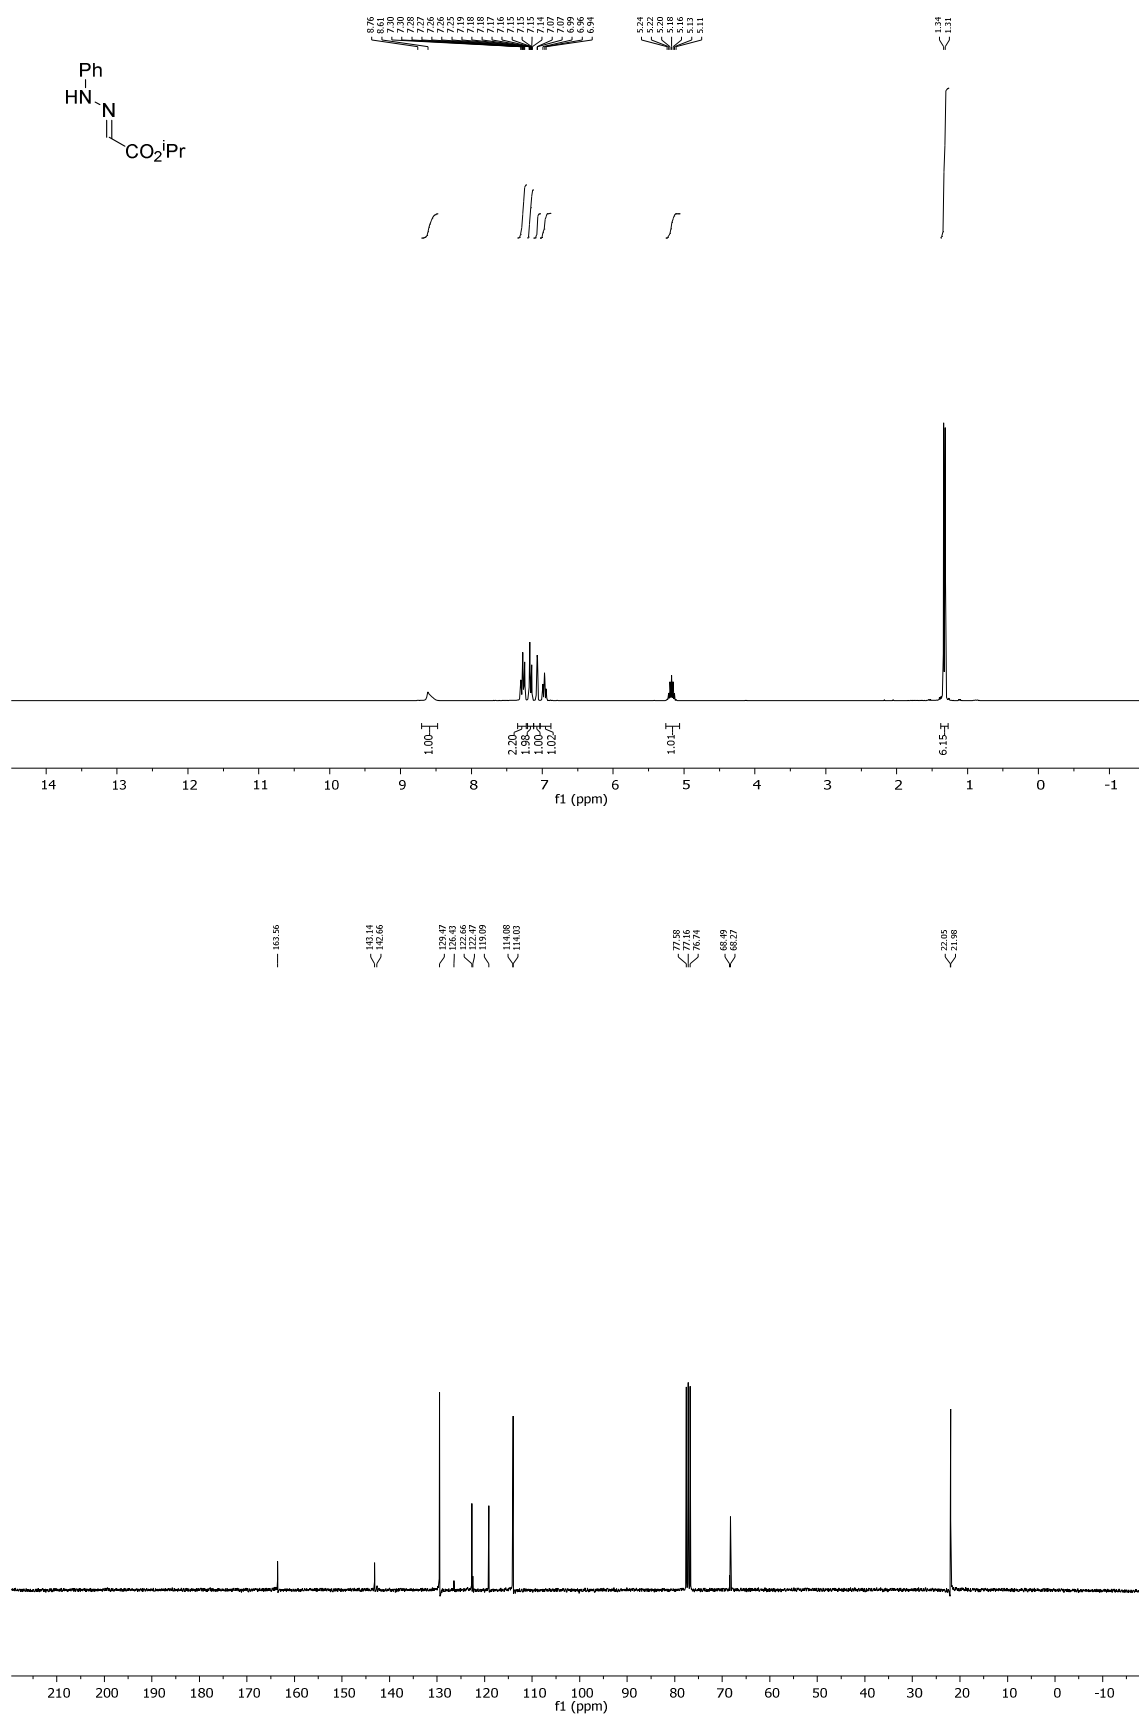

Figure SI-5. NMR spectra for compound **1f**

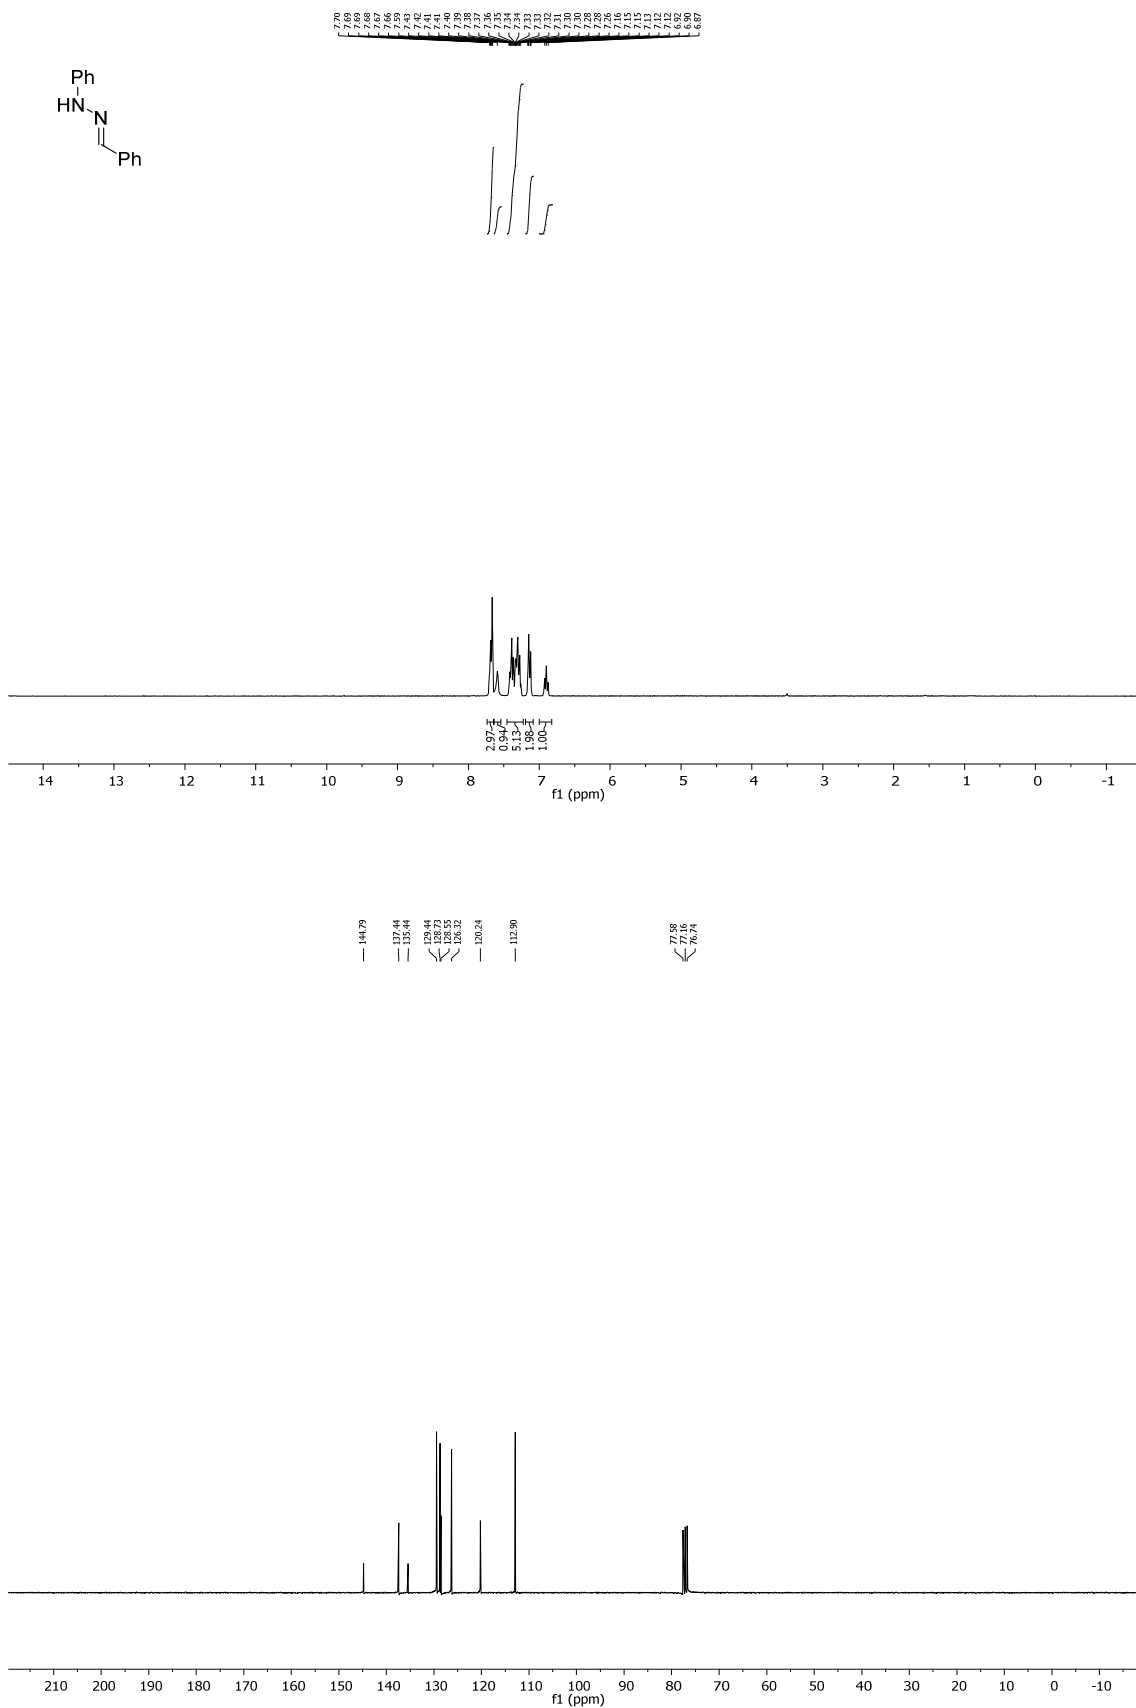

Figure SI-6. NMR spectra for compound **1i**

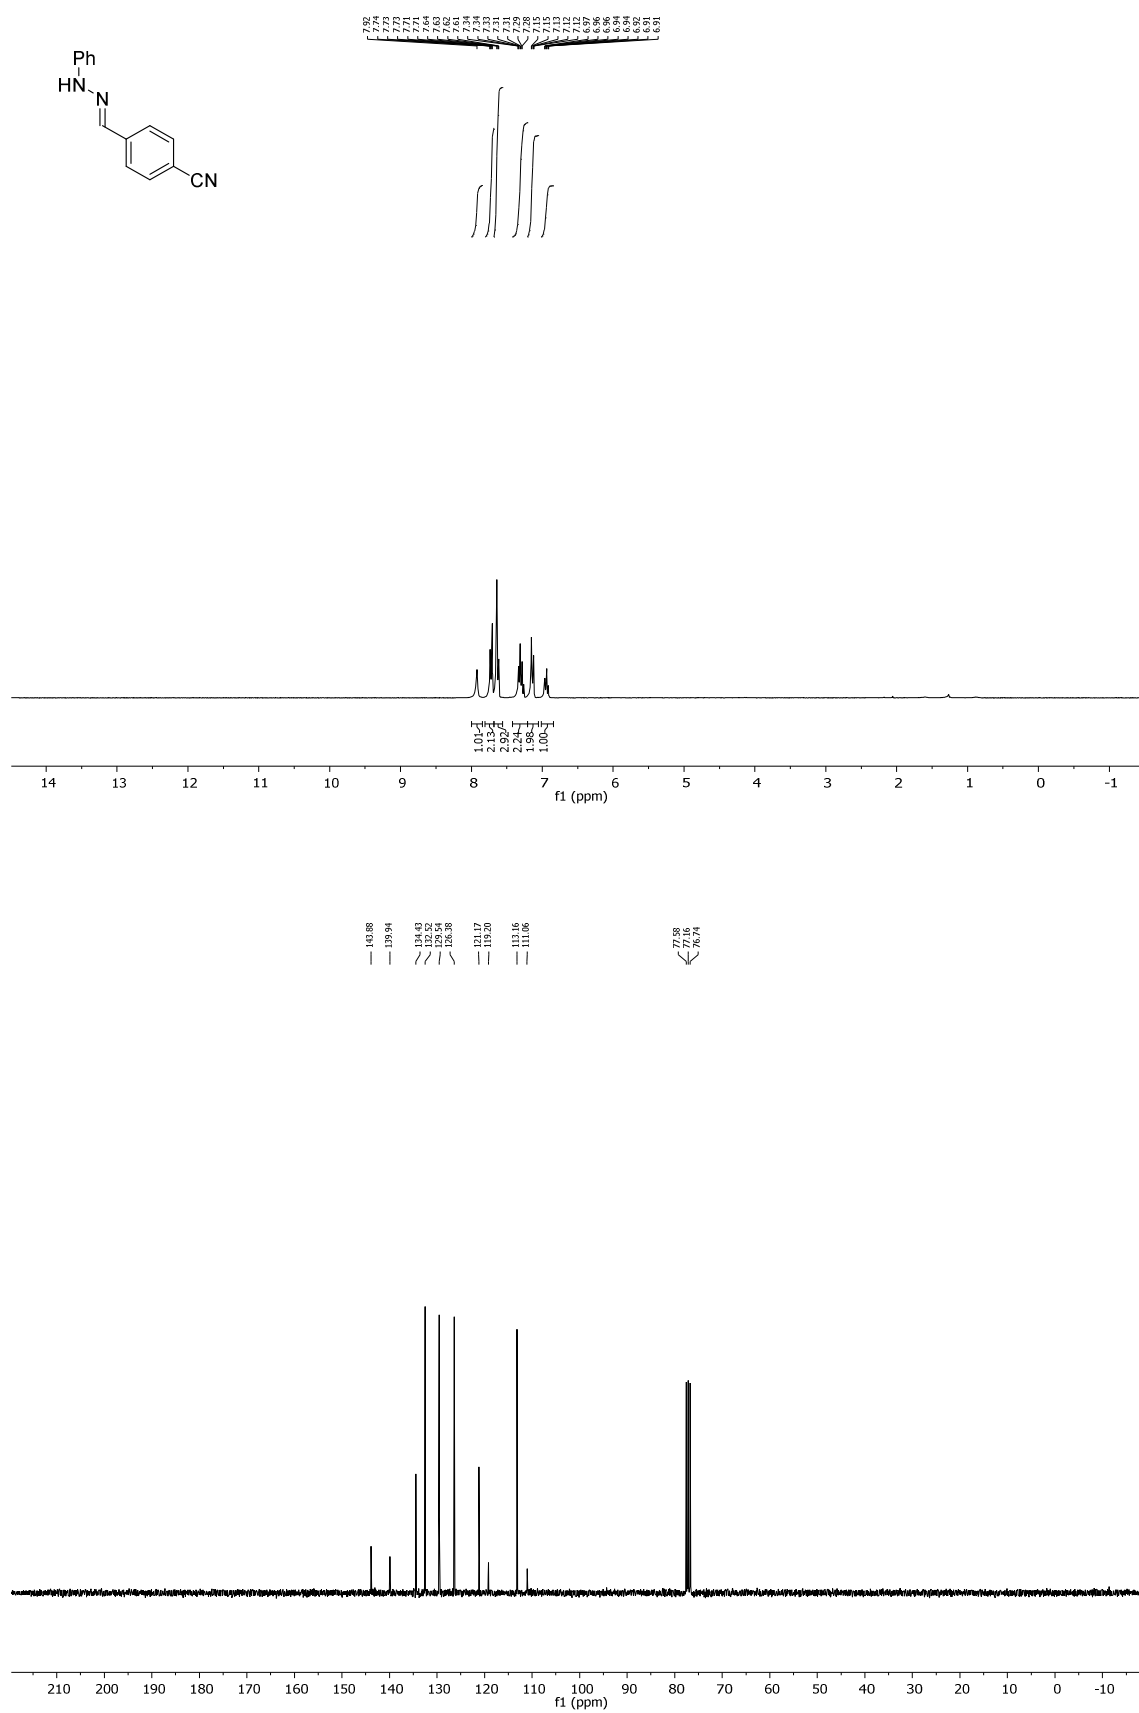

Figure SI-7. NMR spectra for compound **1k**

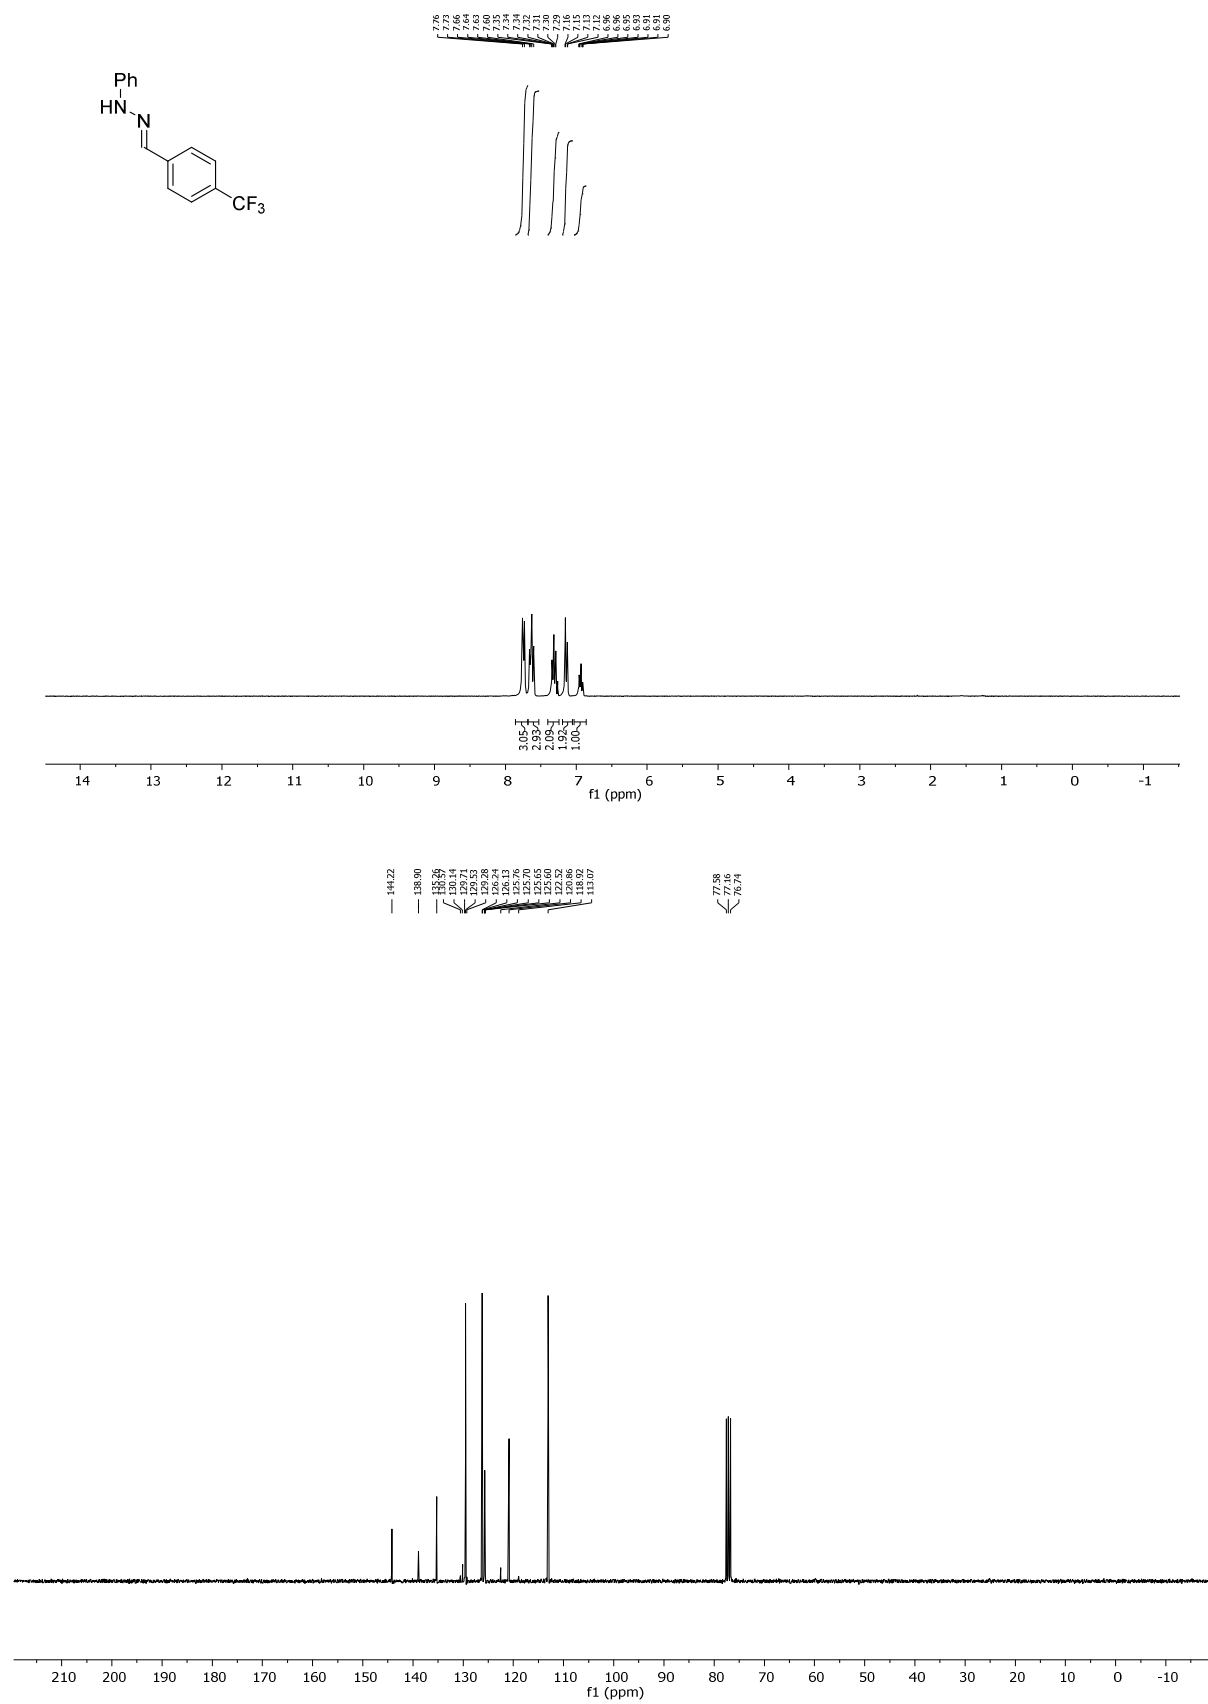

**Figure SI-8.** NMR spectra for compound **11**

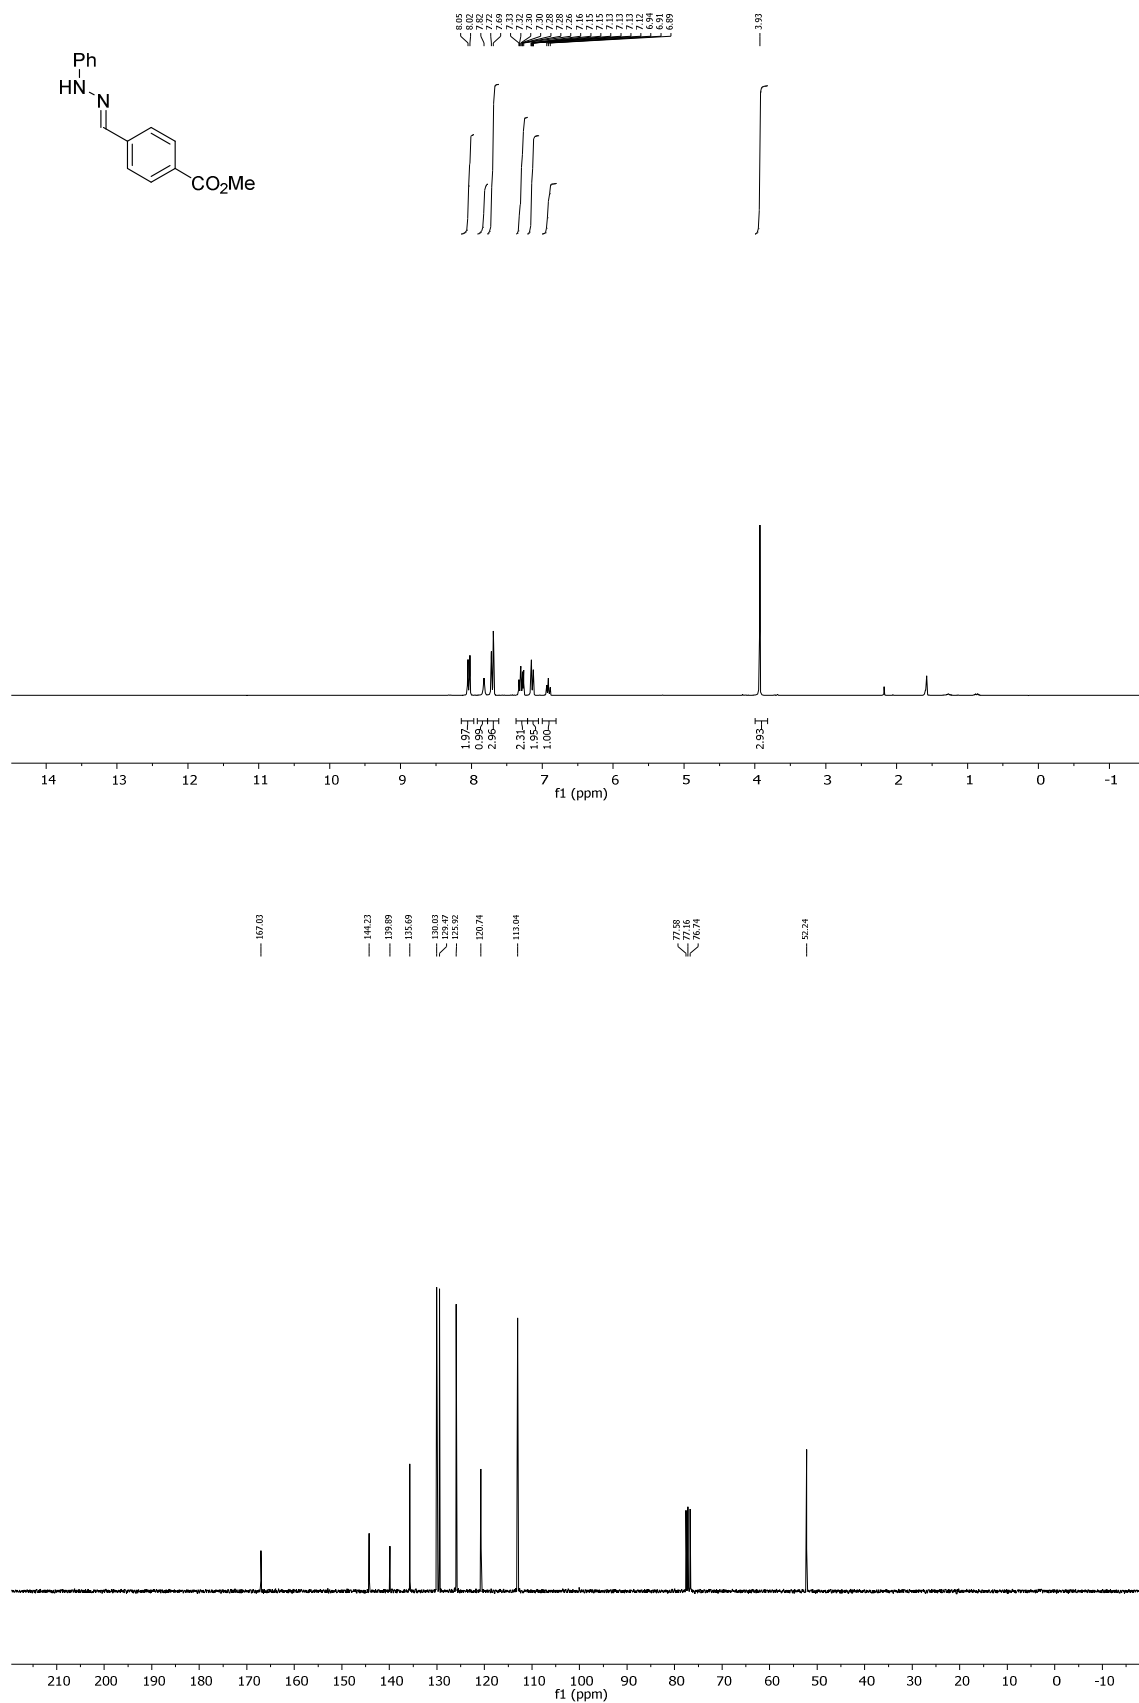

**Figure SI-9.** NMR spectra for compound **1m**

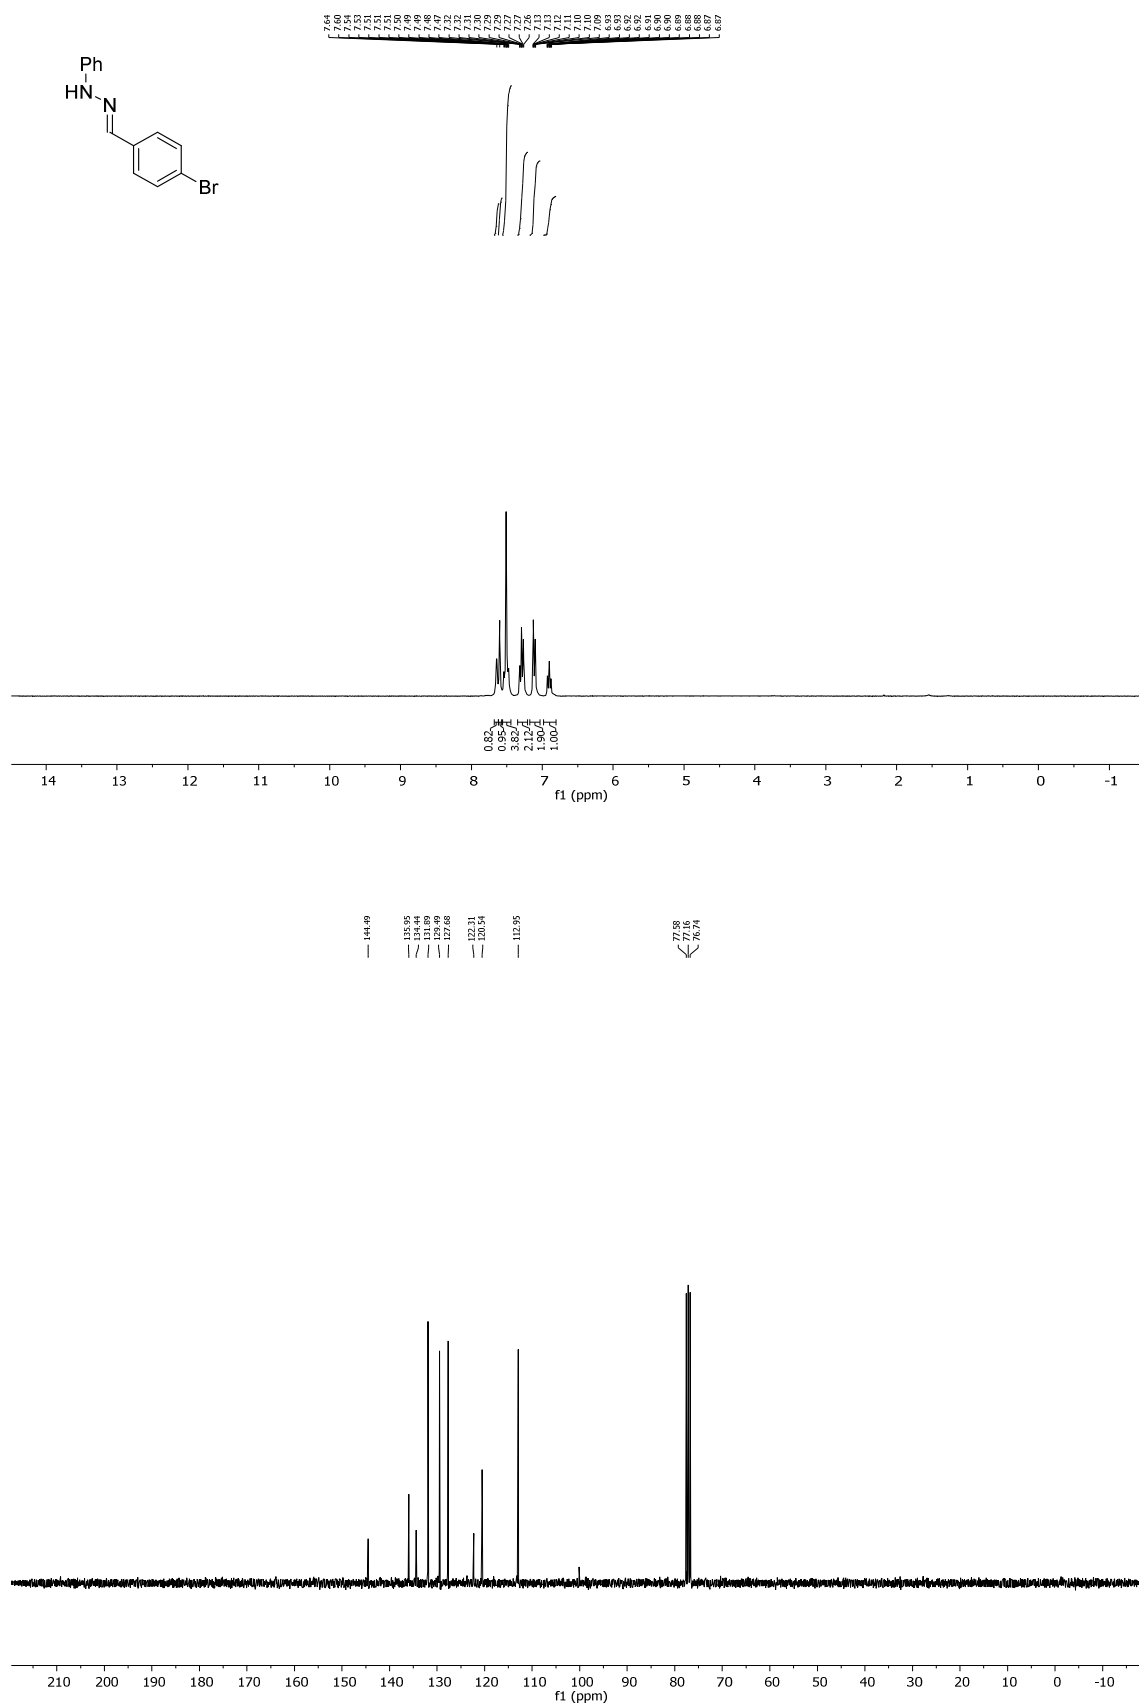

Figure SI-10. NMR spectra for compound **1n**



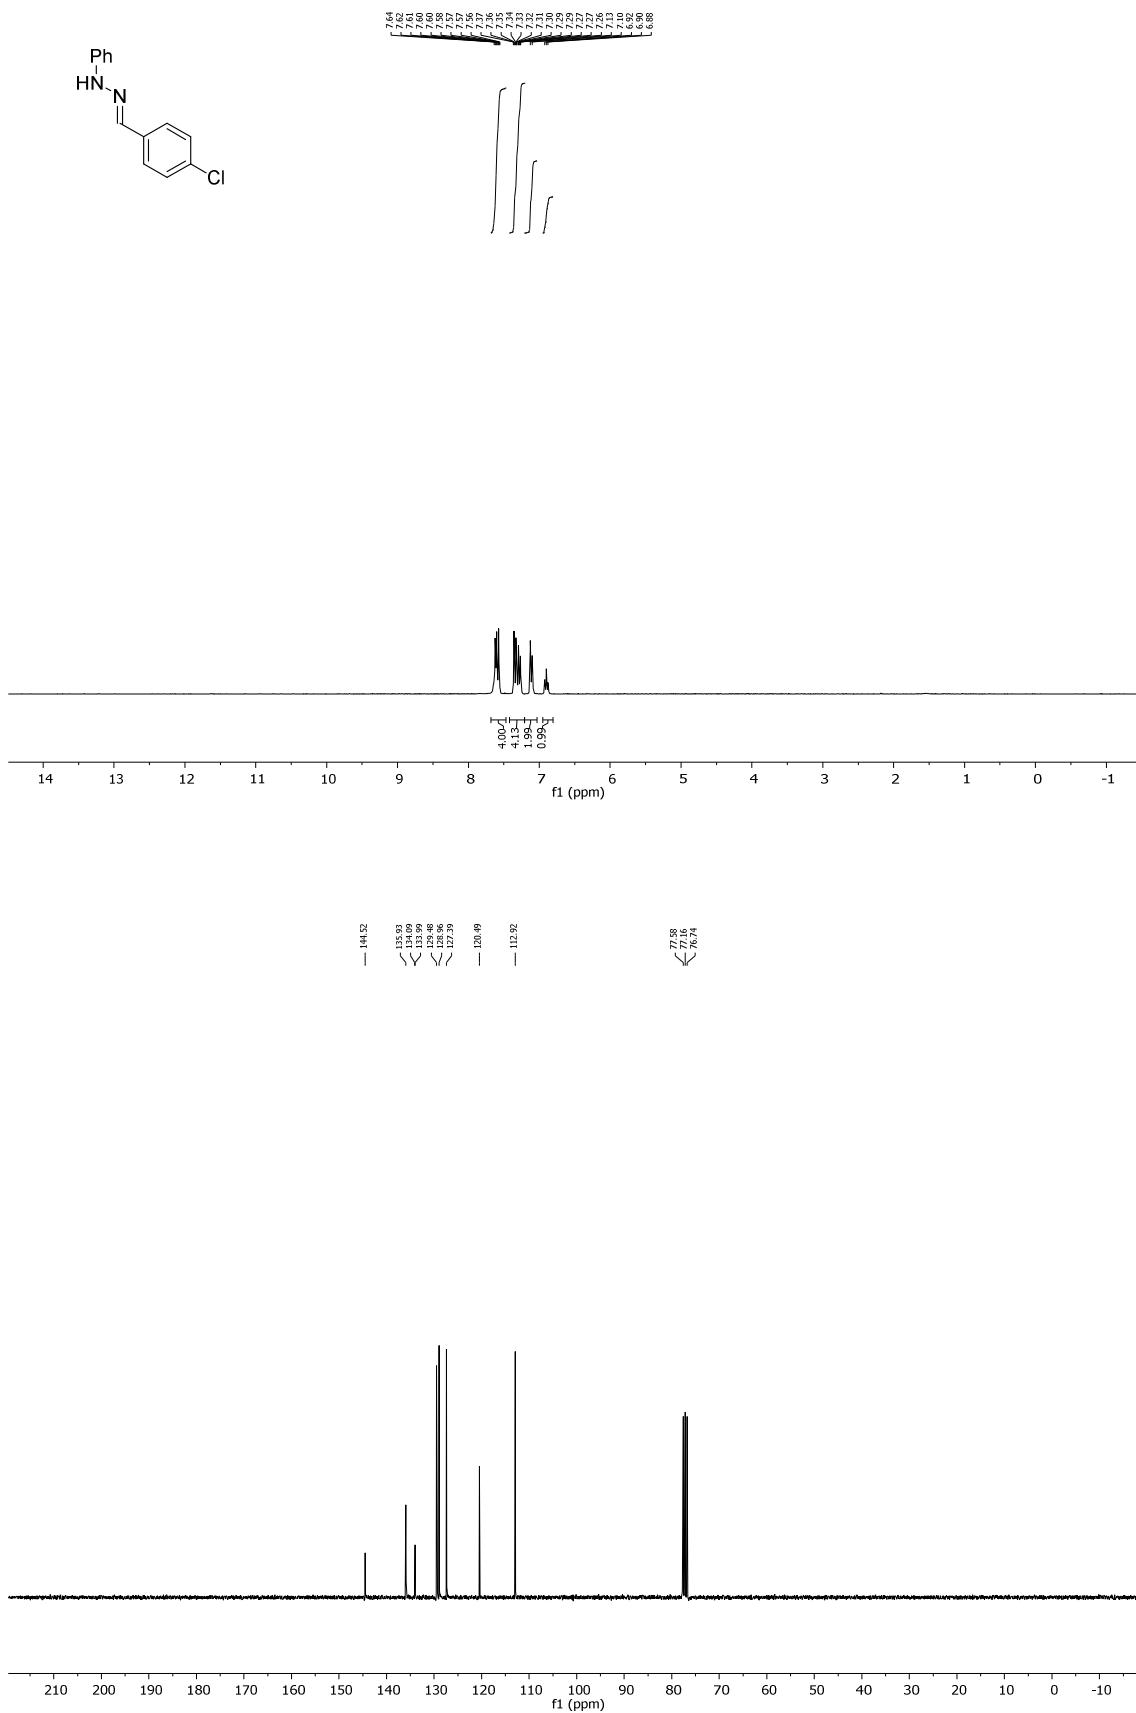

Figure SI-11. NMR spectra for compound **1o**

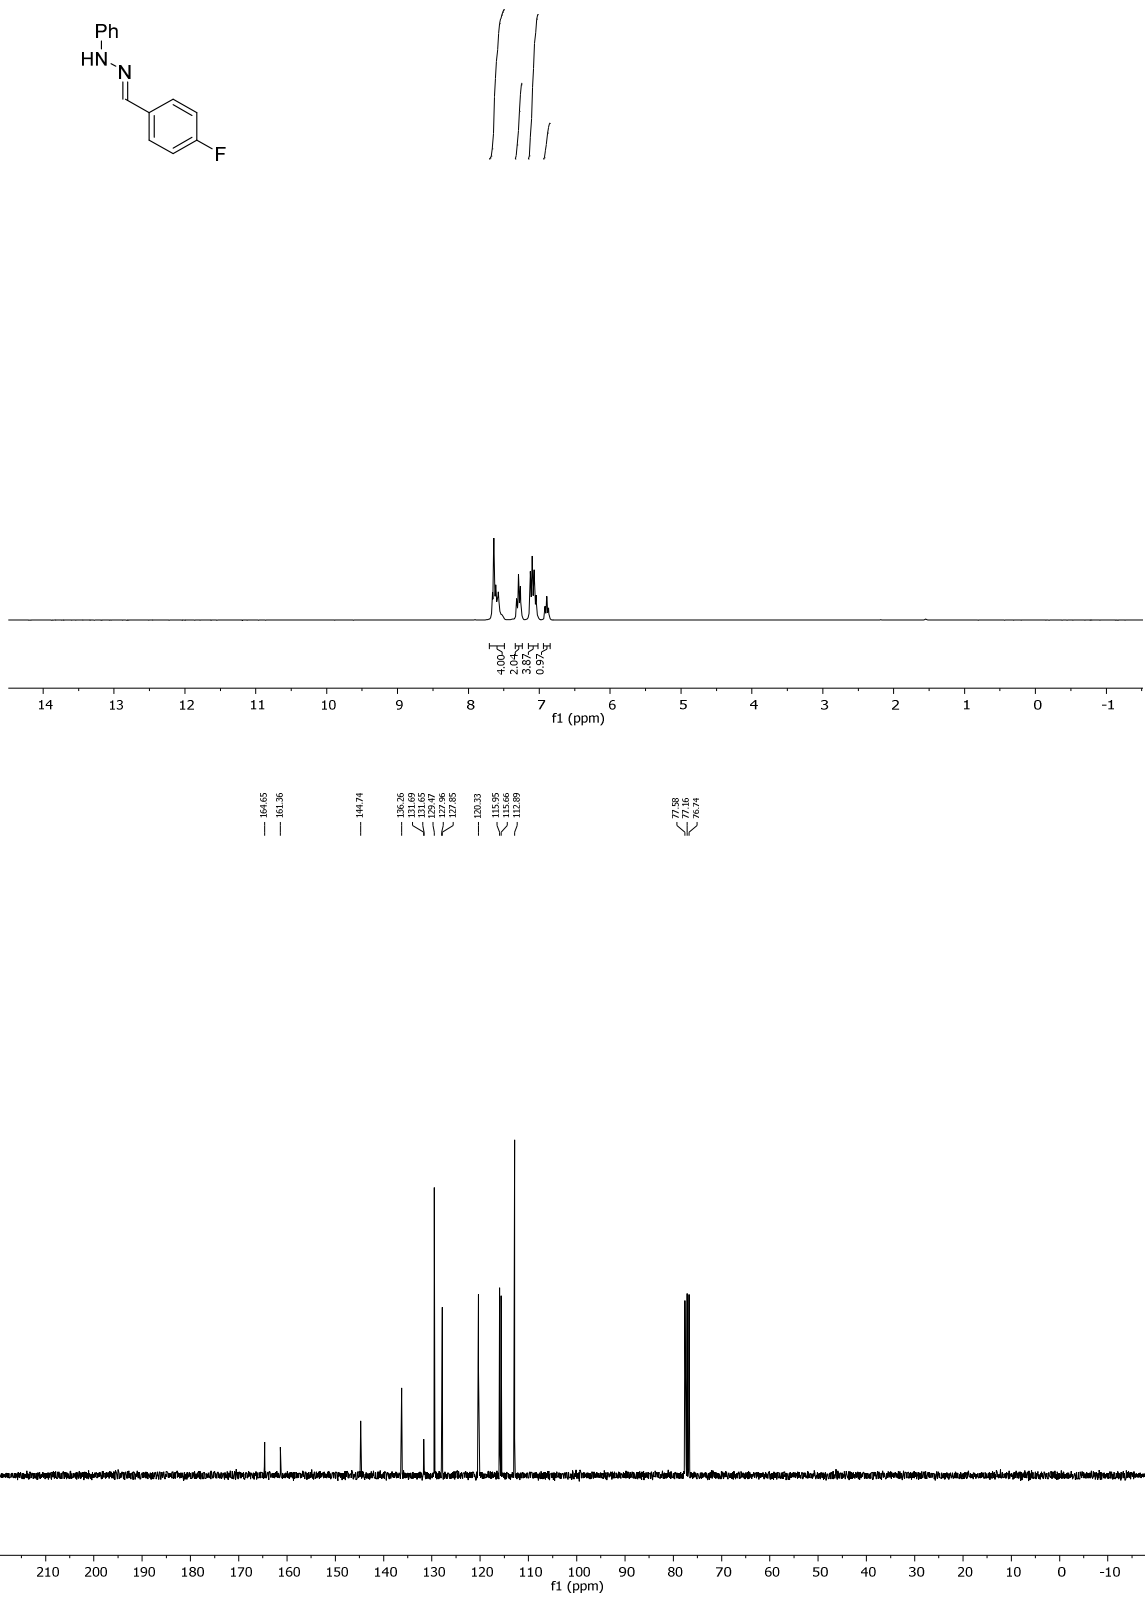

**Figure SI-12.** NMR spectra for compound **1p**

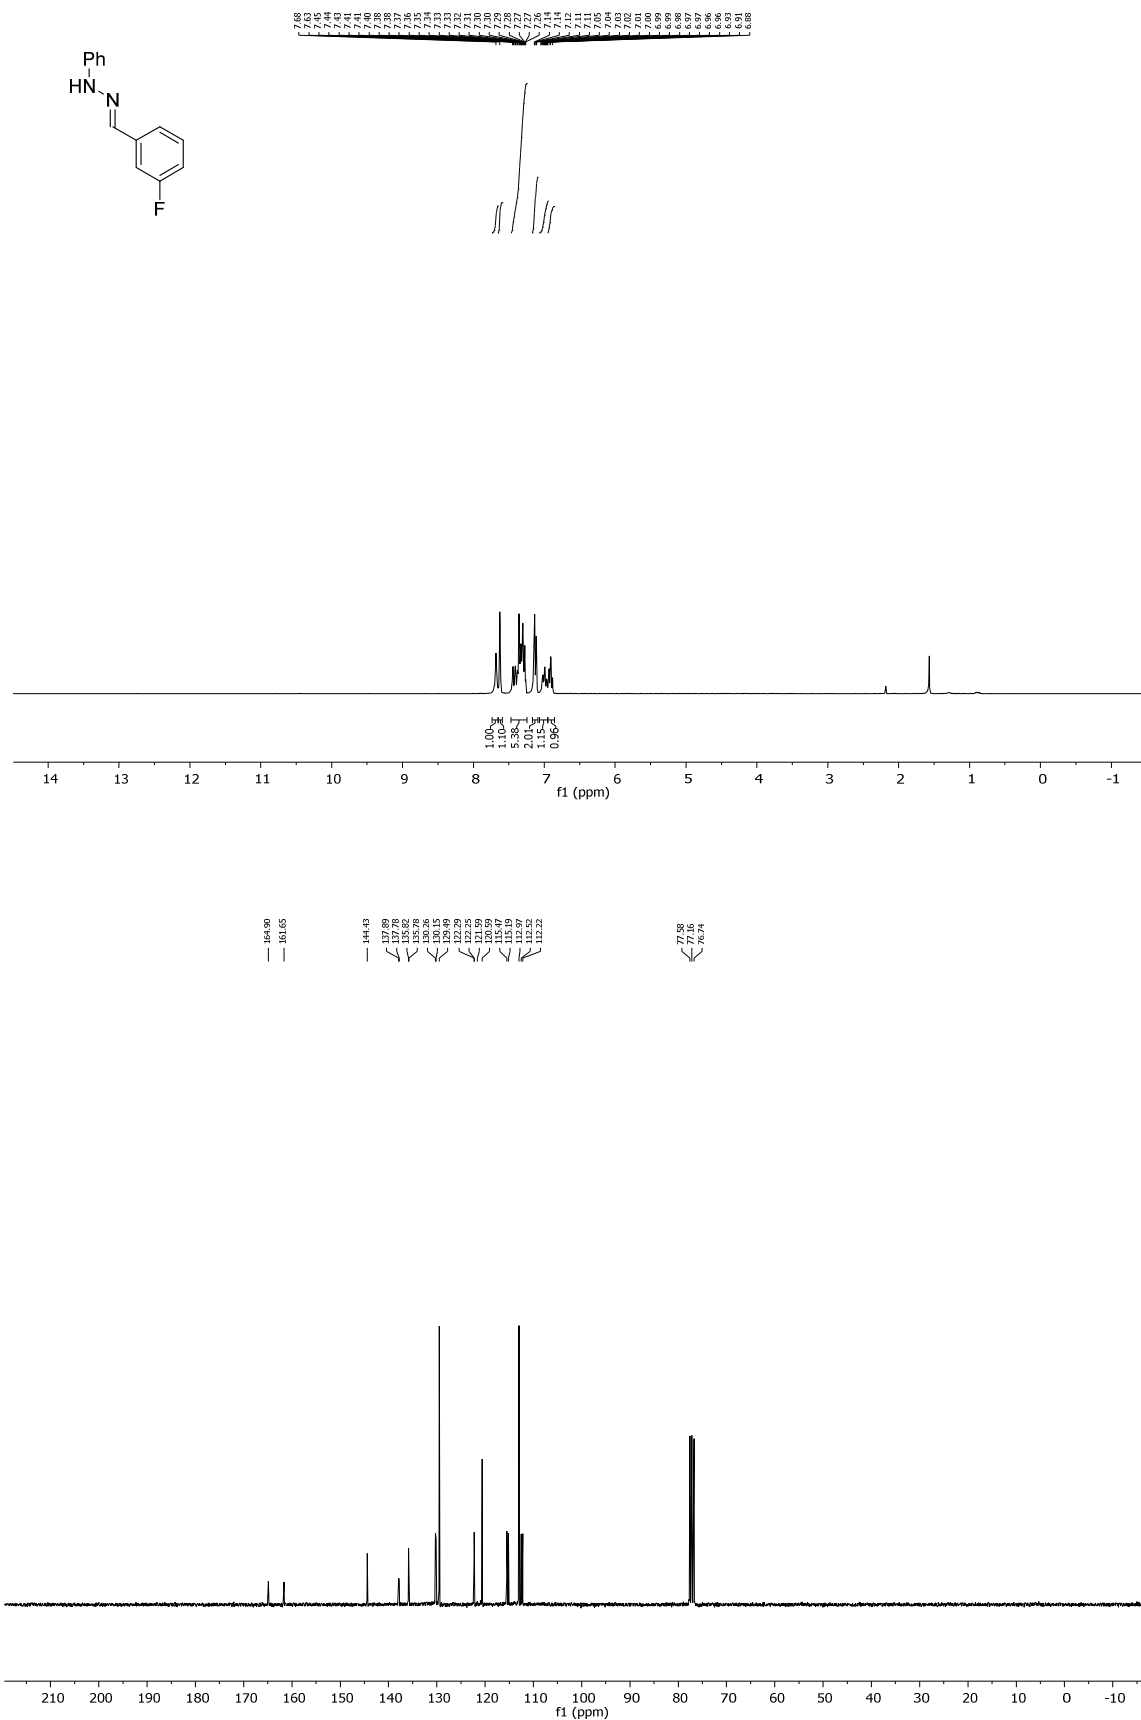

Figure SI-13. NMR spectra for compound **1q**

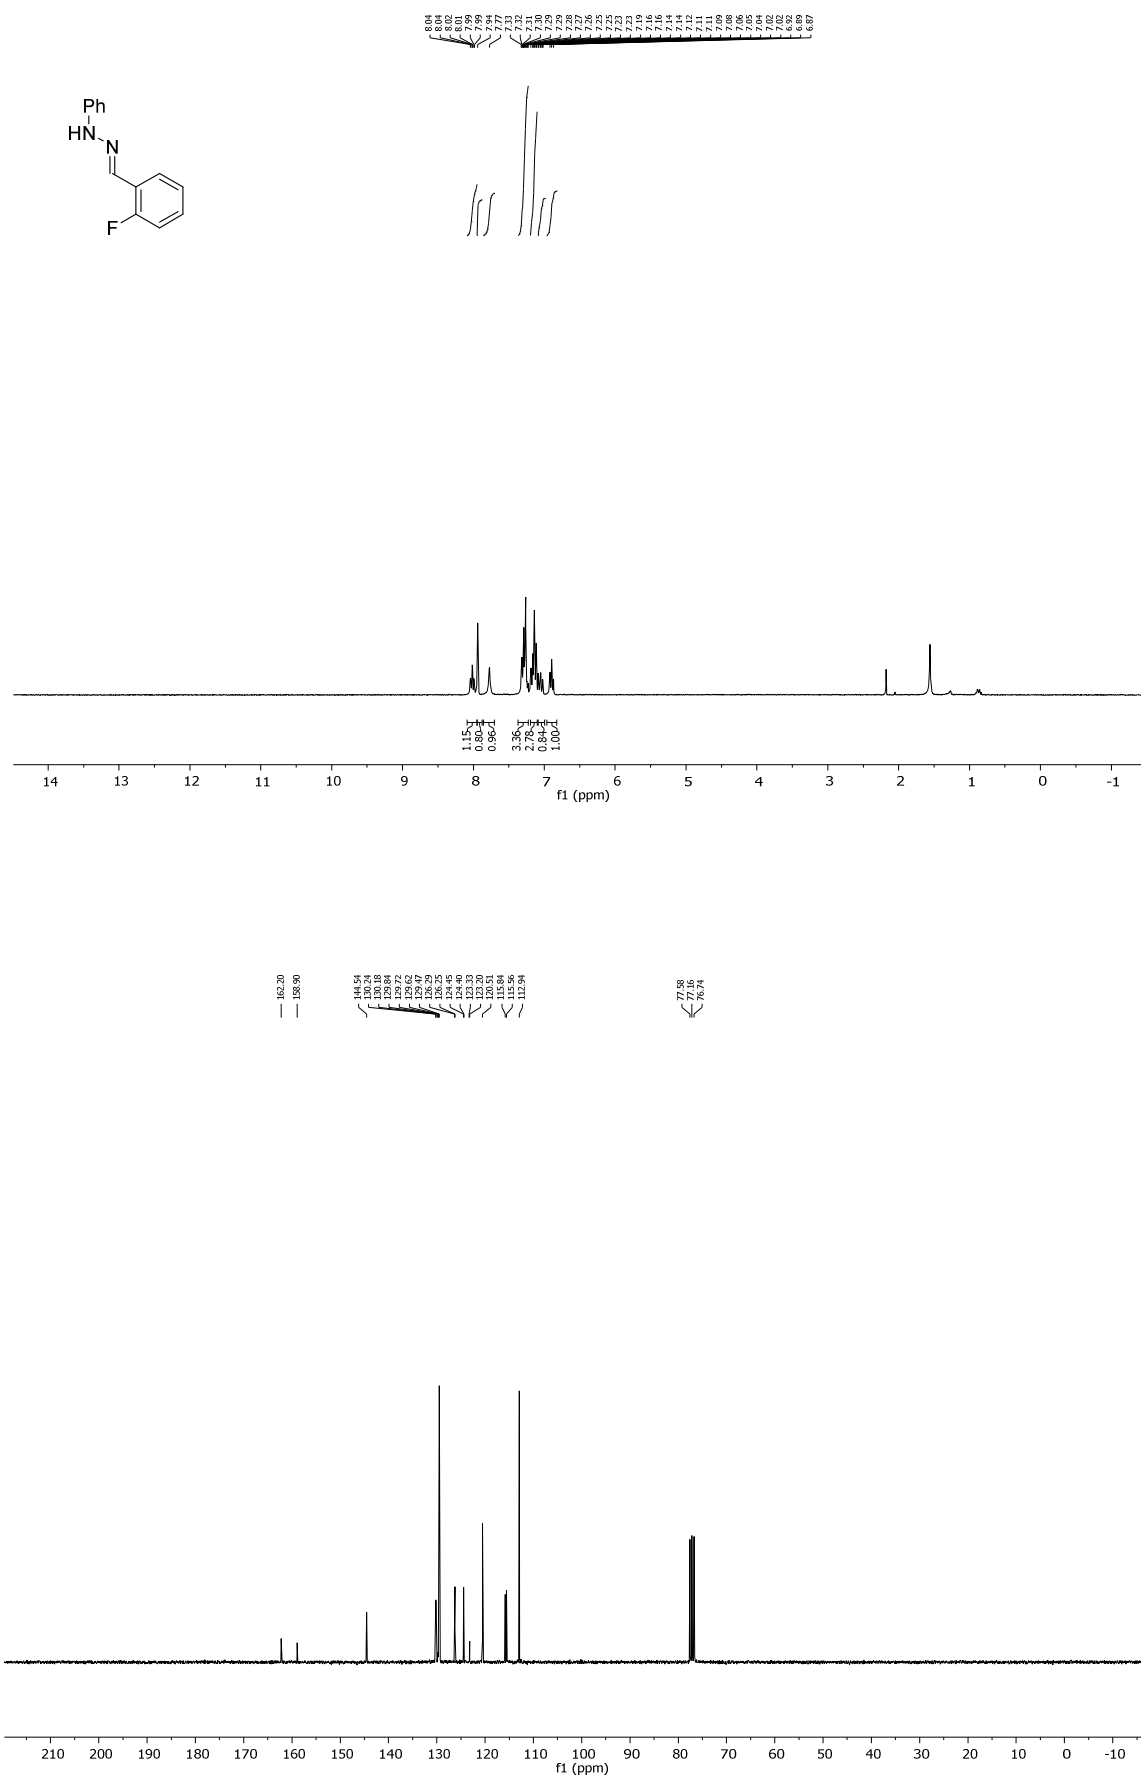

**Figure SI-14.** NMR spectra for compound **1r**

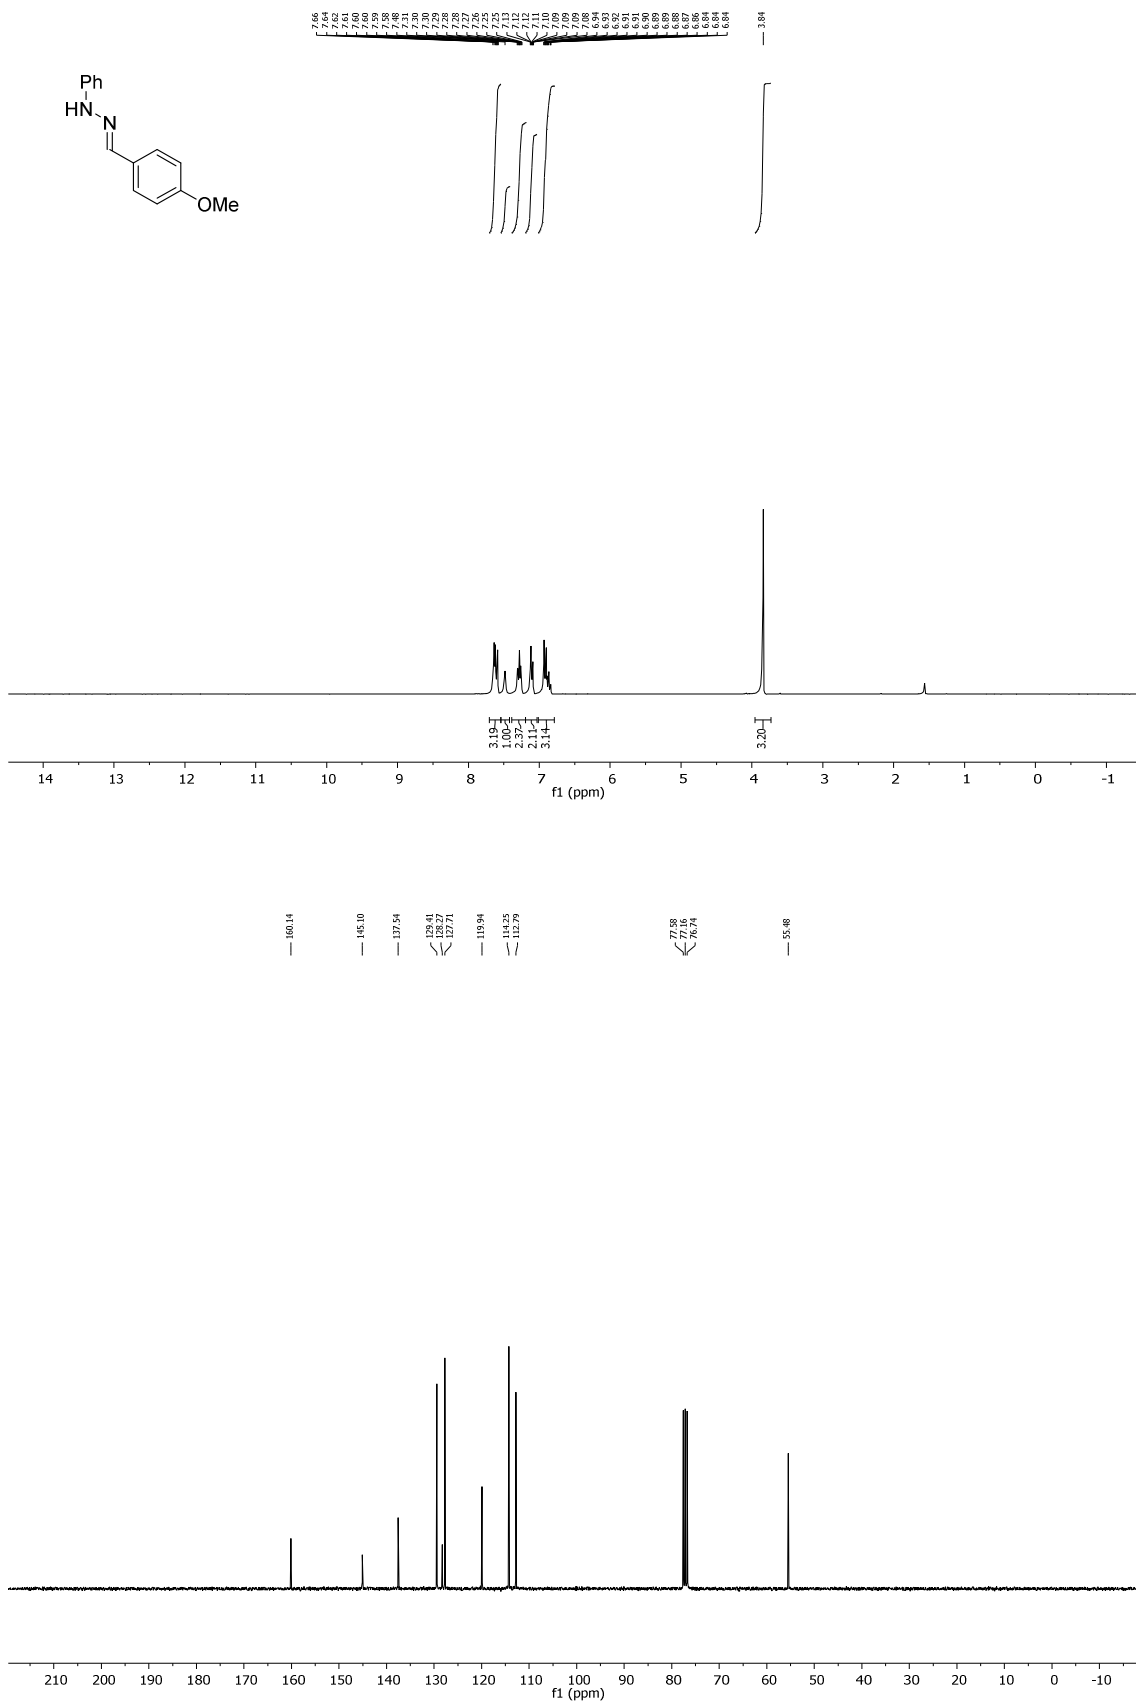

Figure SI-15. NMR spectra for compound **1t**

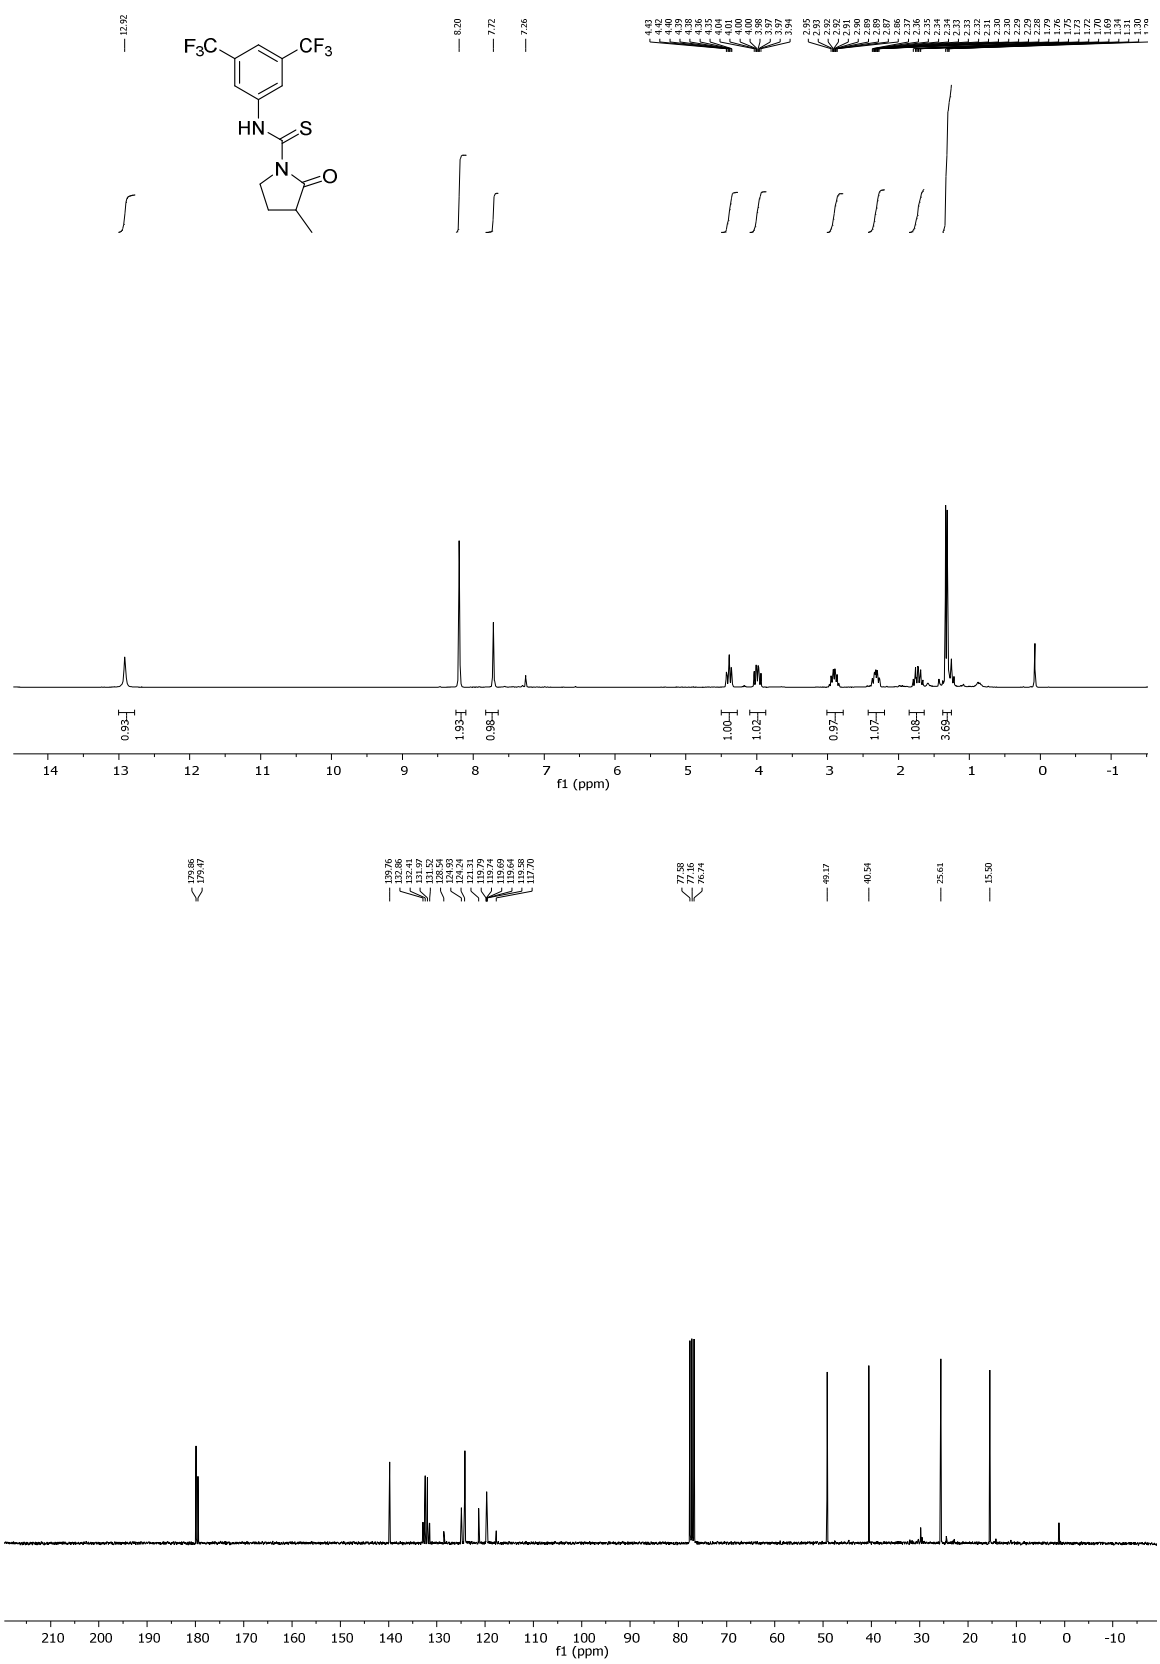

Figure SI-16. NMR spectra for compound Ia

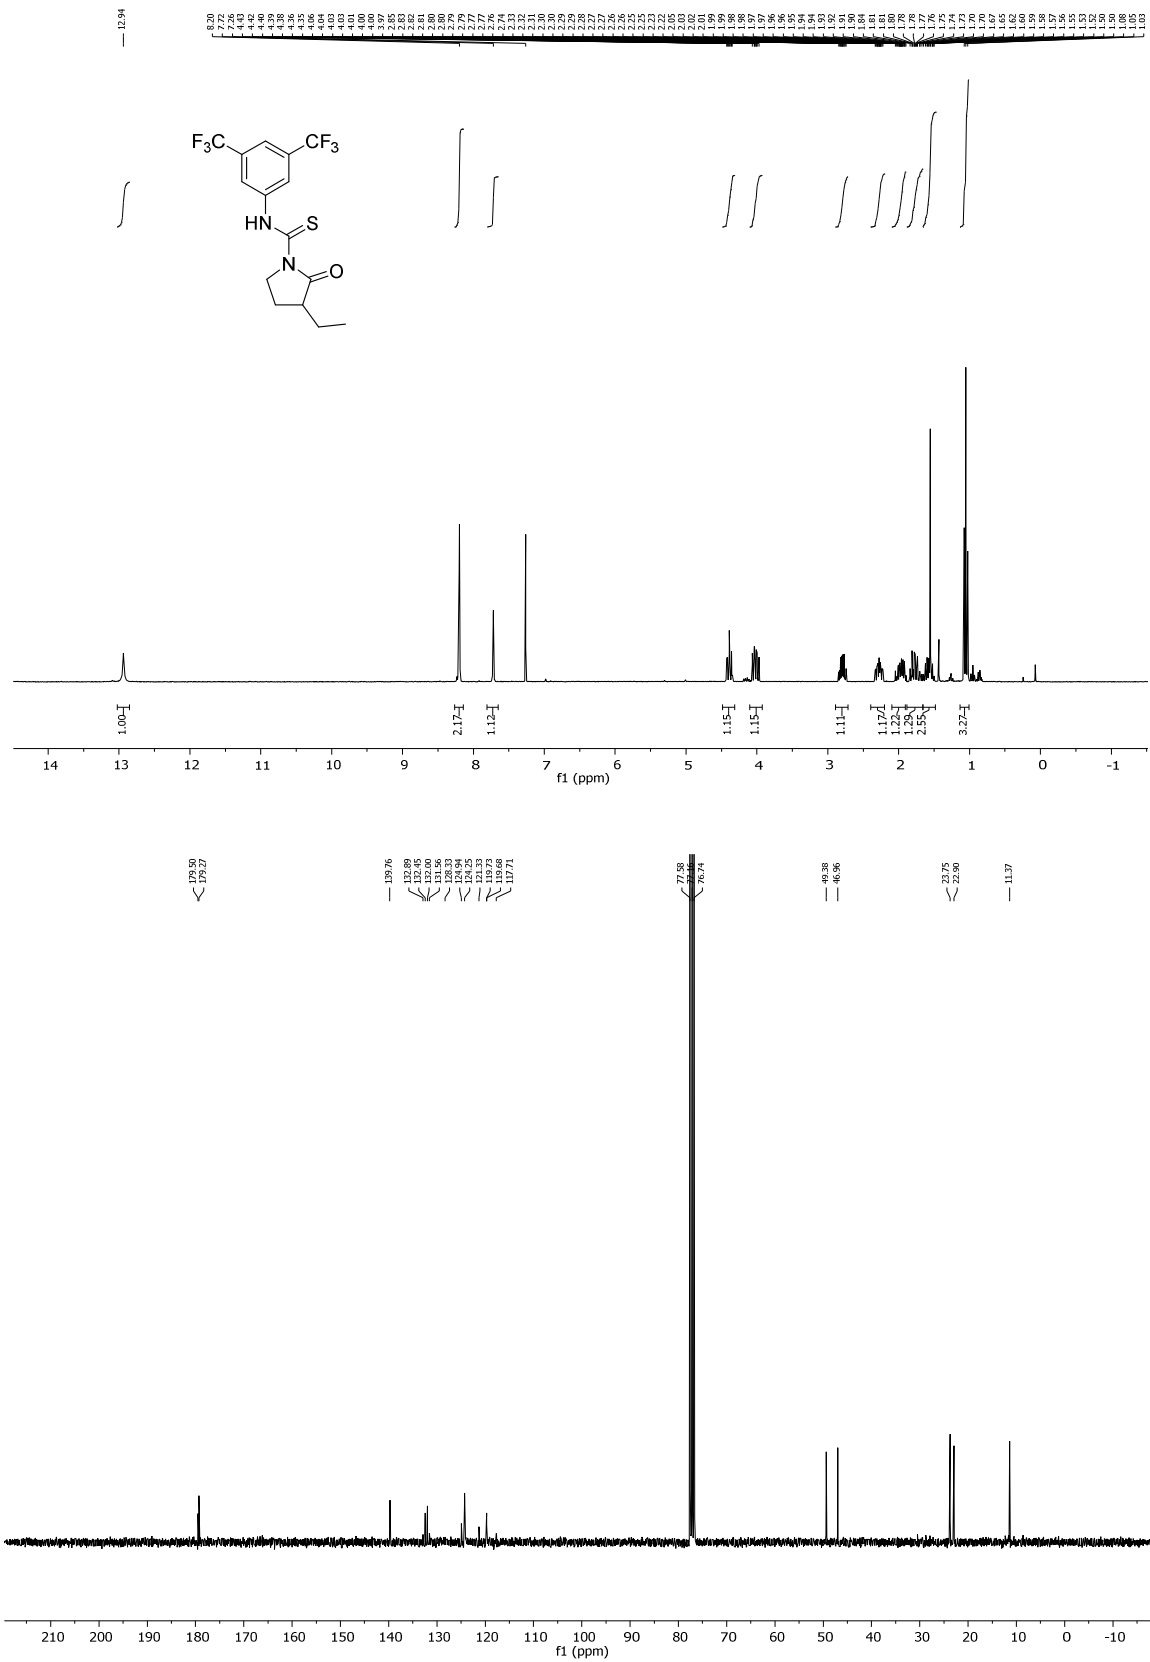

Figure SI-17. NMR spectra for compound Ib

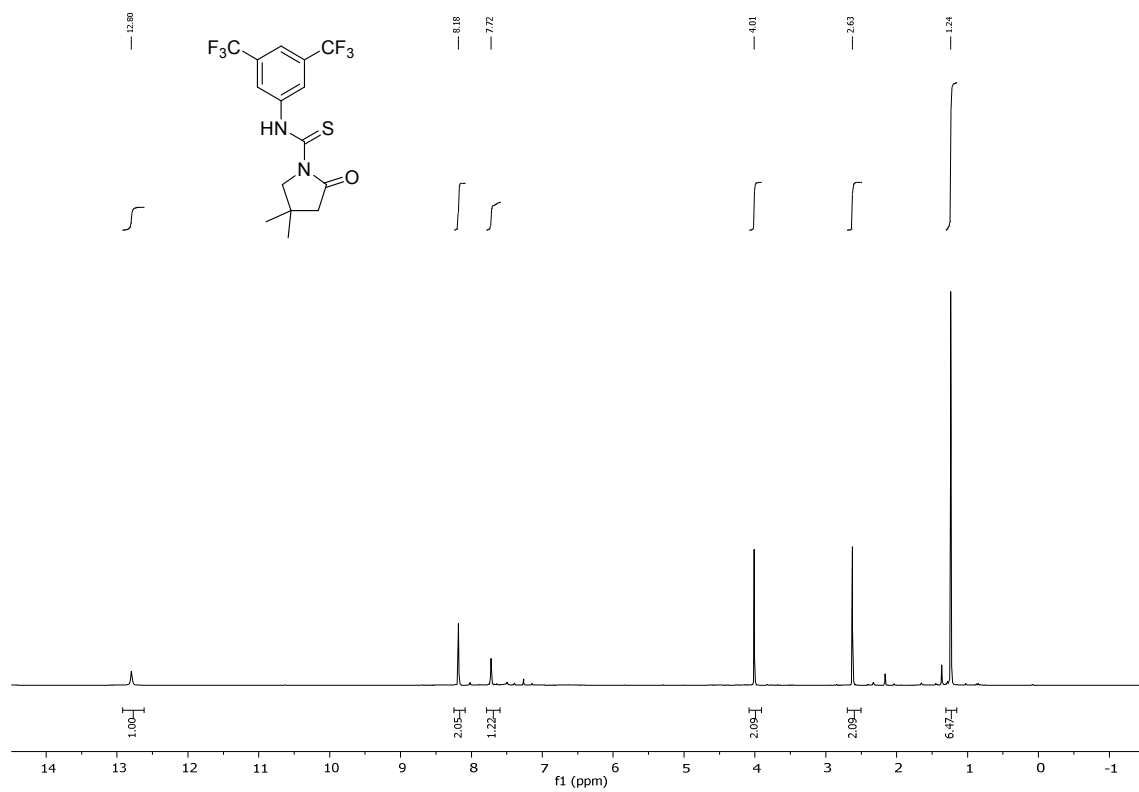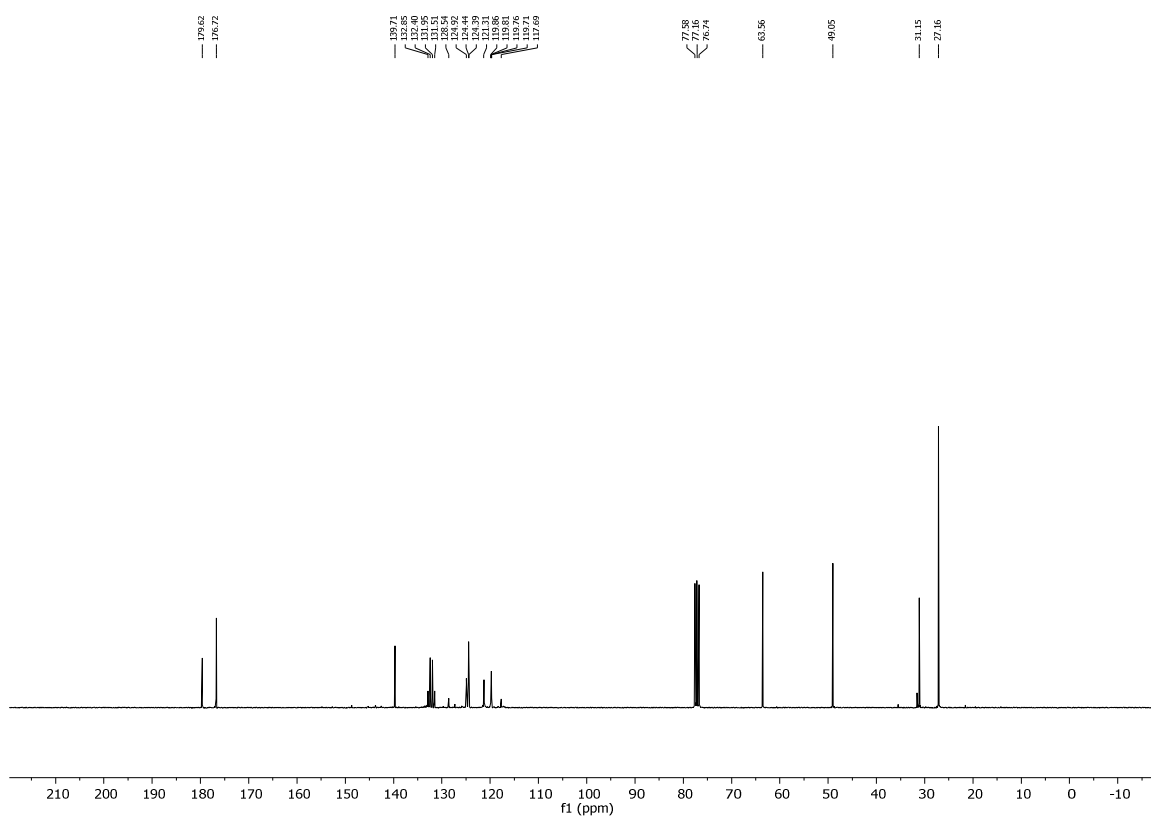

**Figure SI-18.** NMR spectra for compound **Ic**





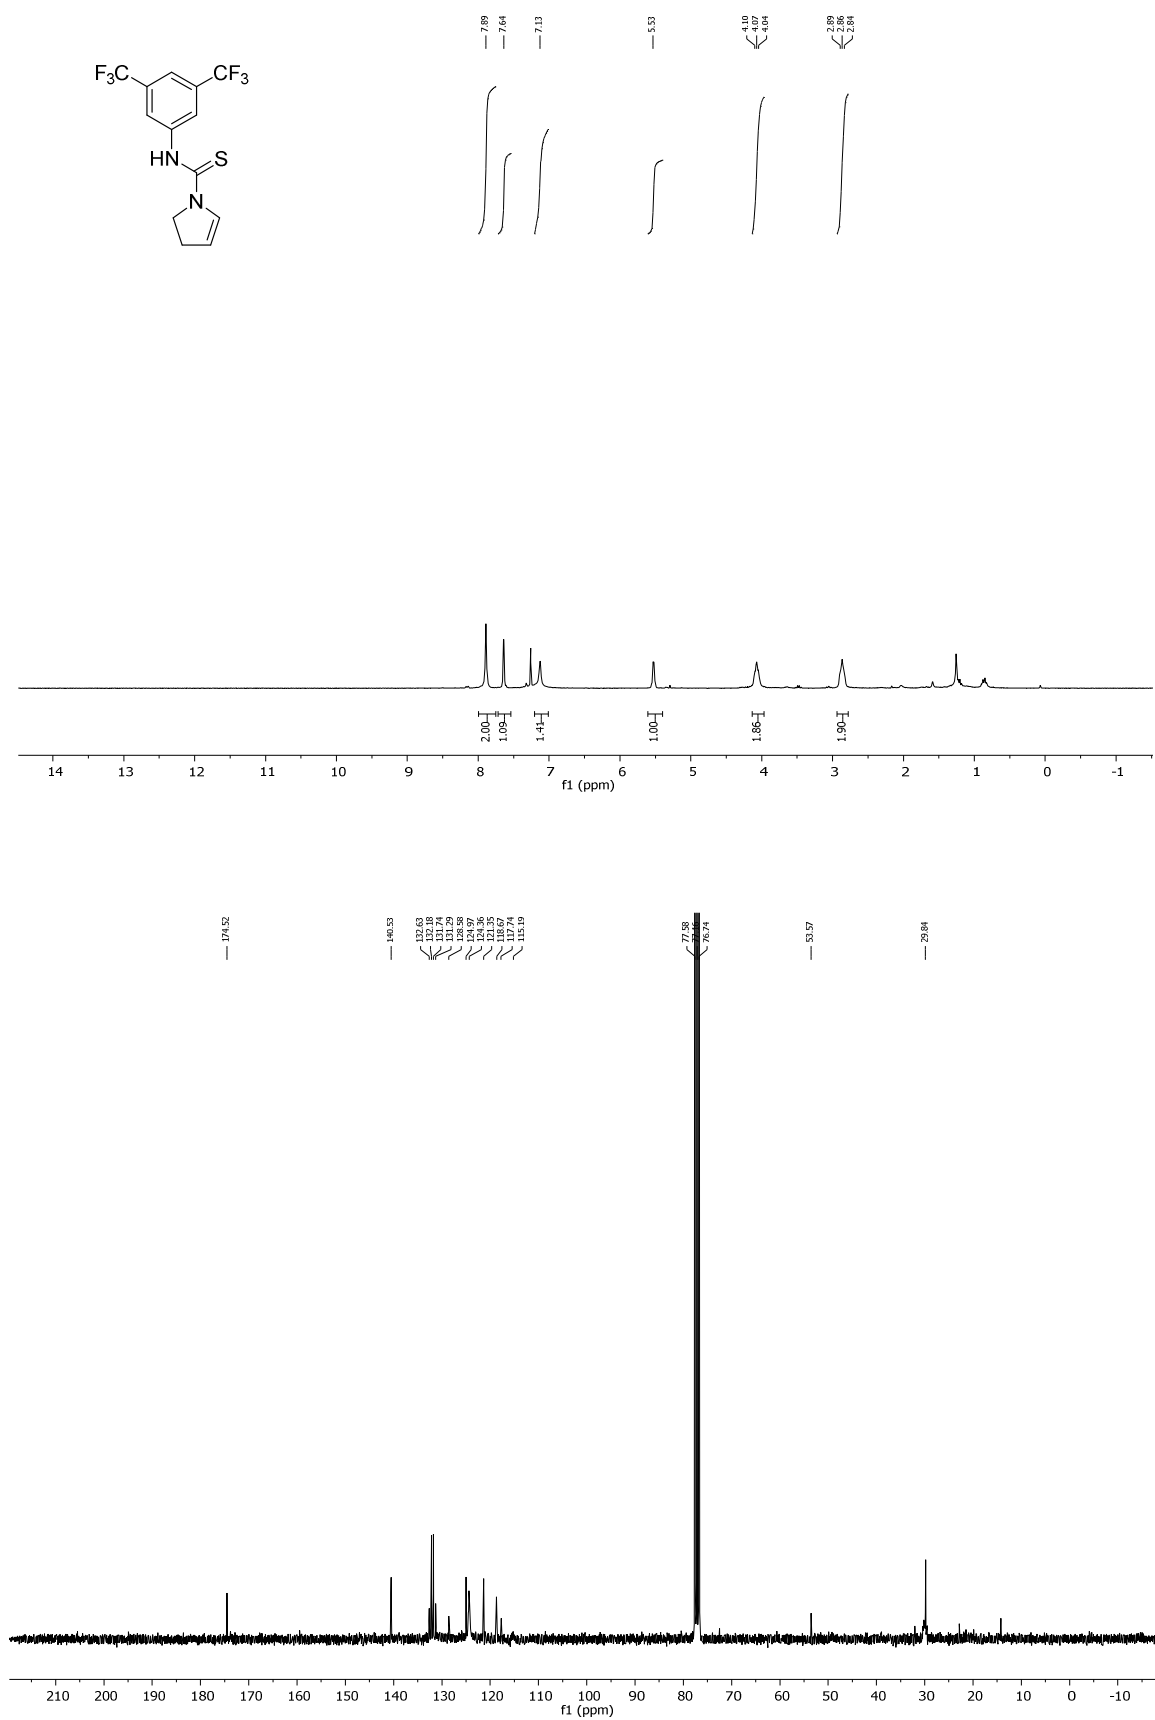

Figure SI-20. NMR spectra for compound 2e

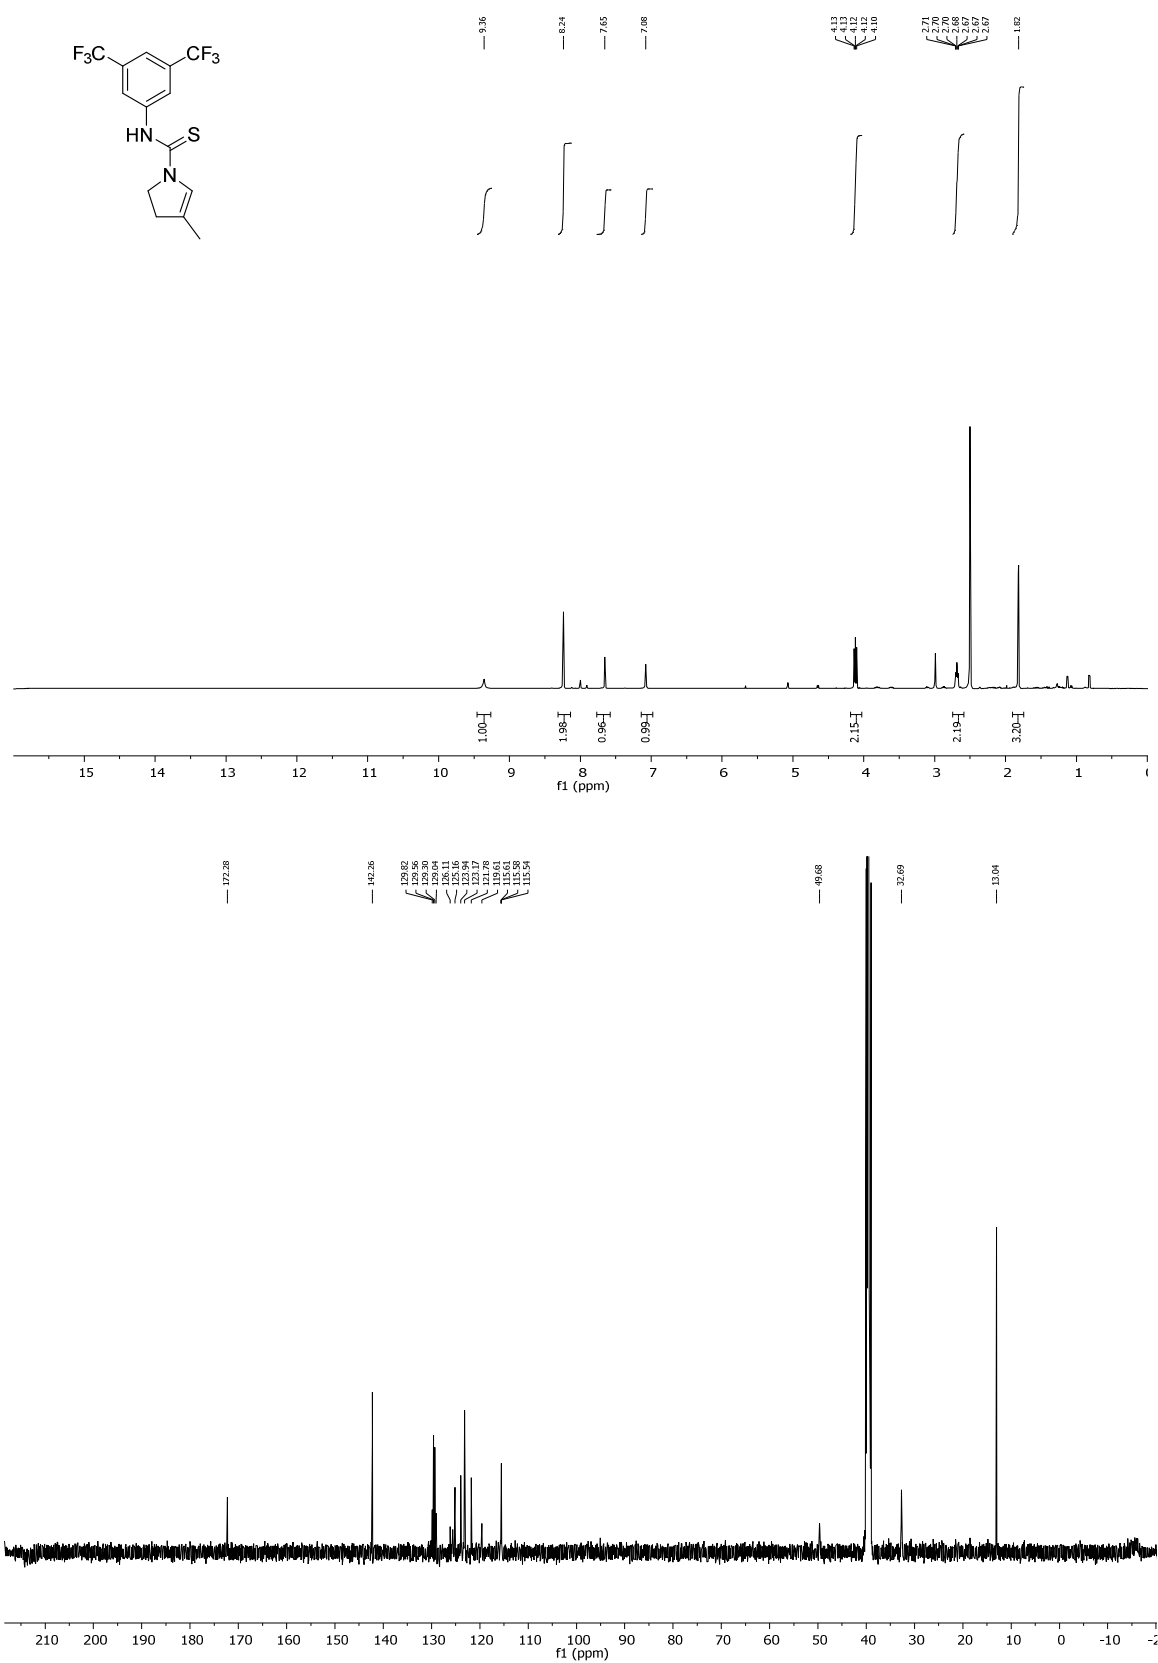

Figure SI-21. NMR spectra for compound **5a** (DMSO-*d*<sub>6</sub>, 100°C)

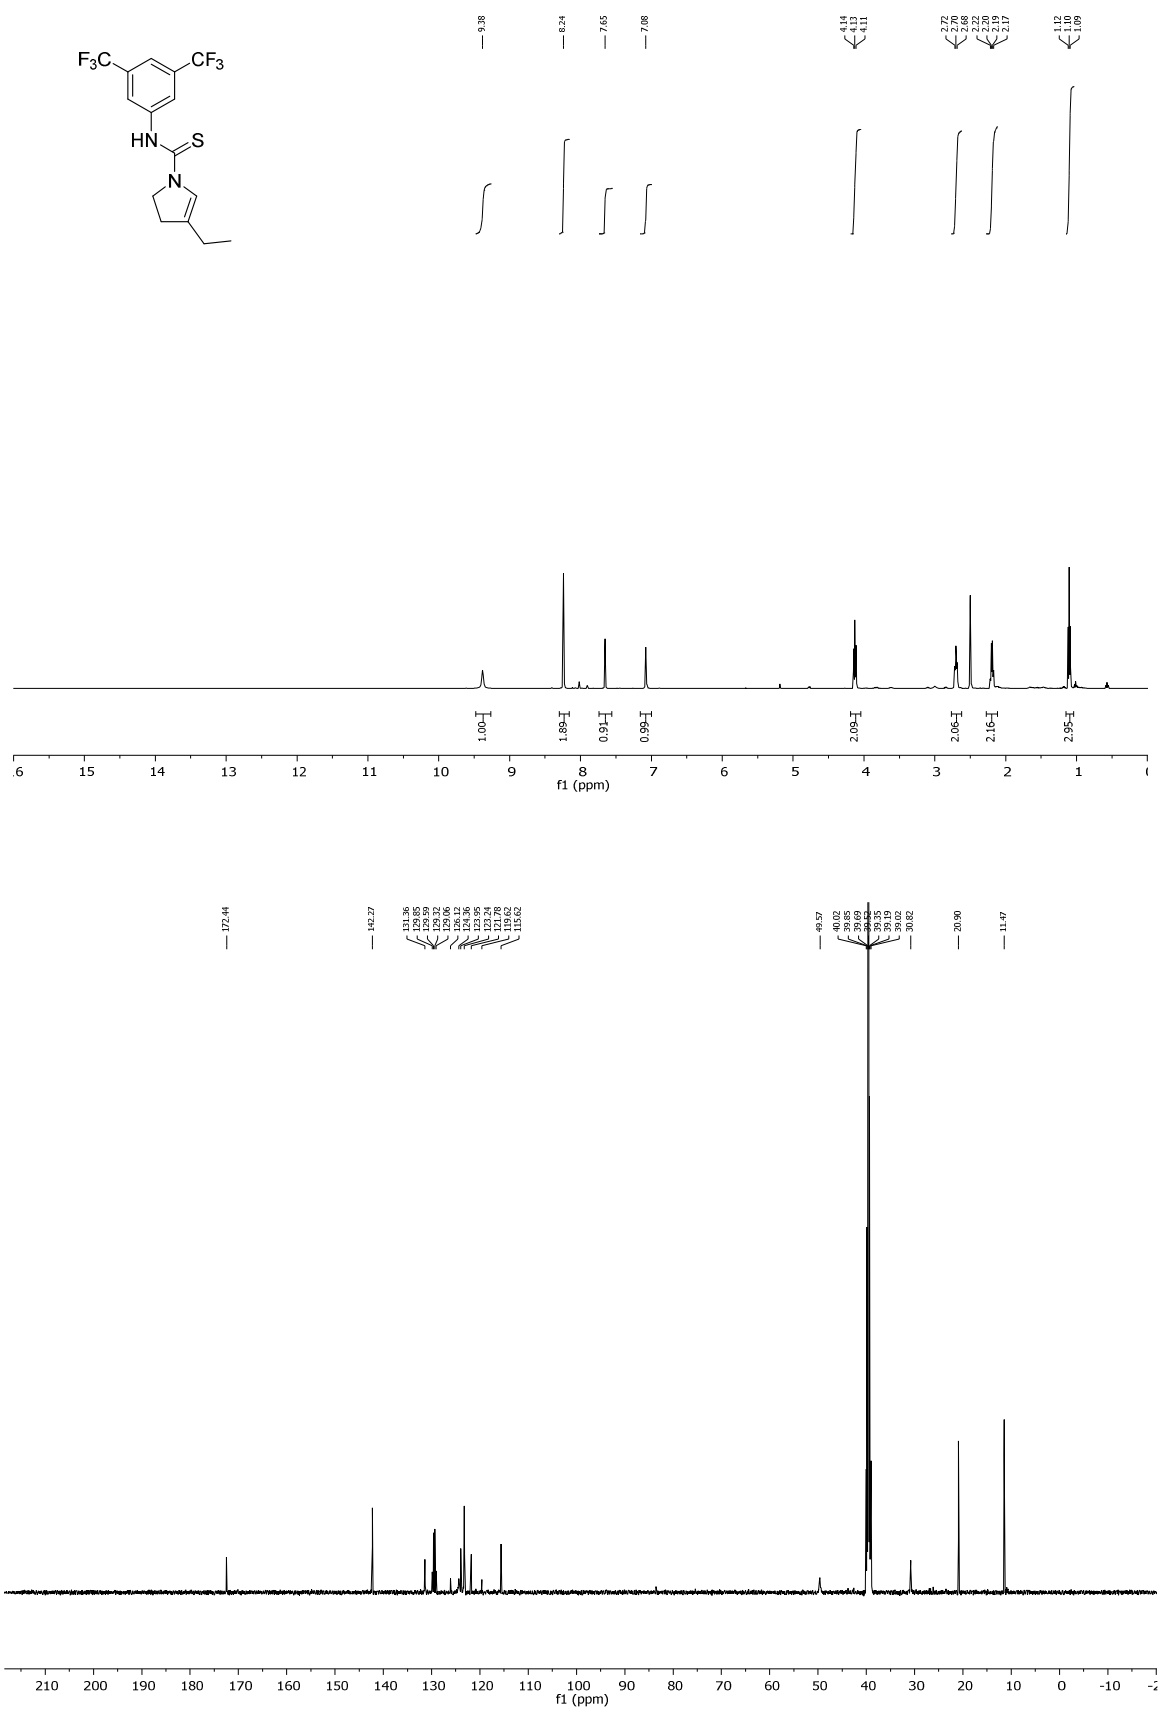

Figure SI-22. NMR spectra for compound **5b** (DMSO-*d*<sub>6</sub>, 100°C)

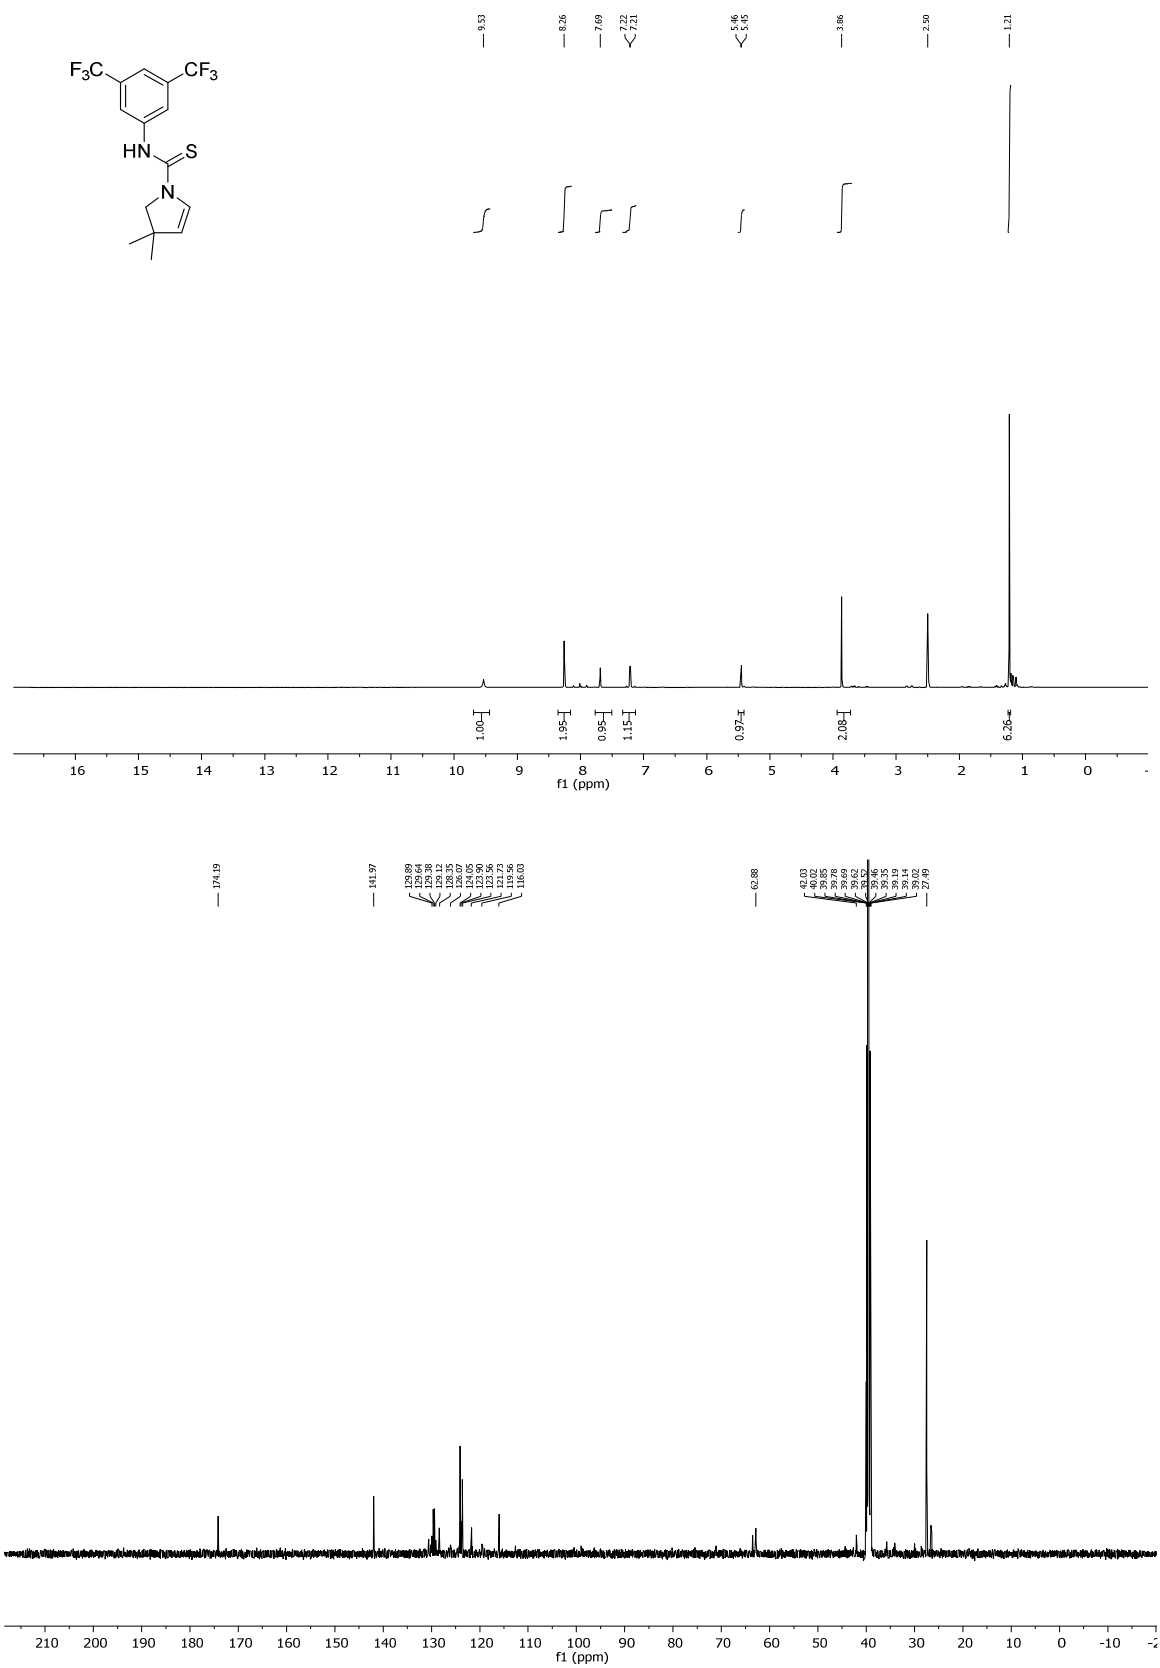

Figure SI-23. NMR spectra for compound 5c (DMSO-*d*<sub>6</sub>)





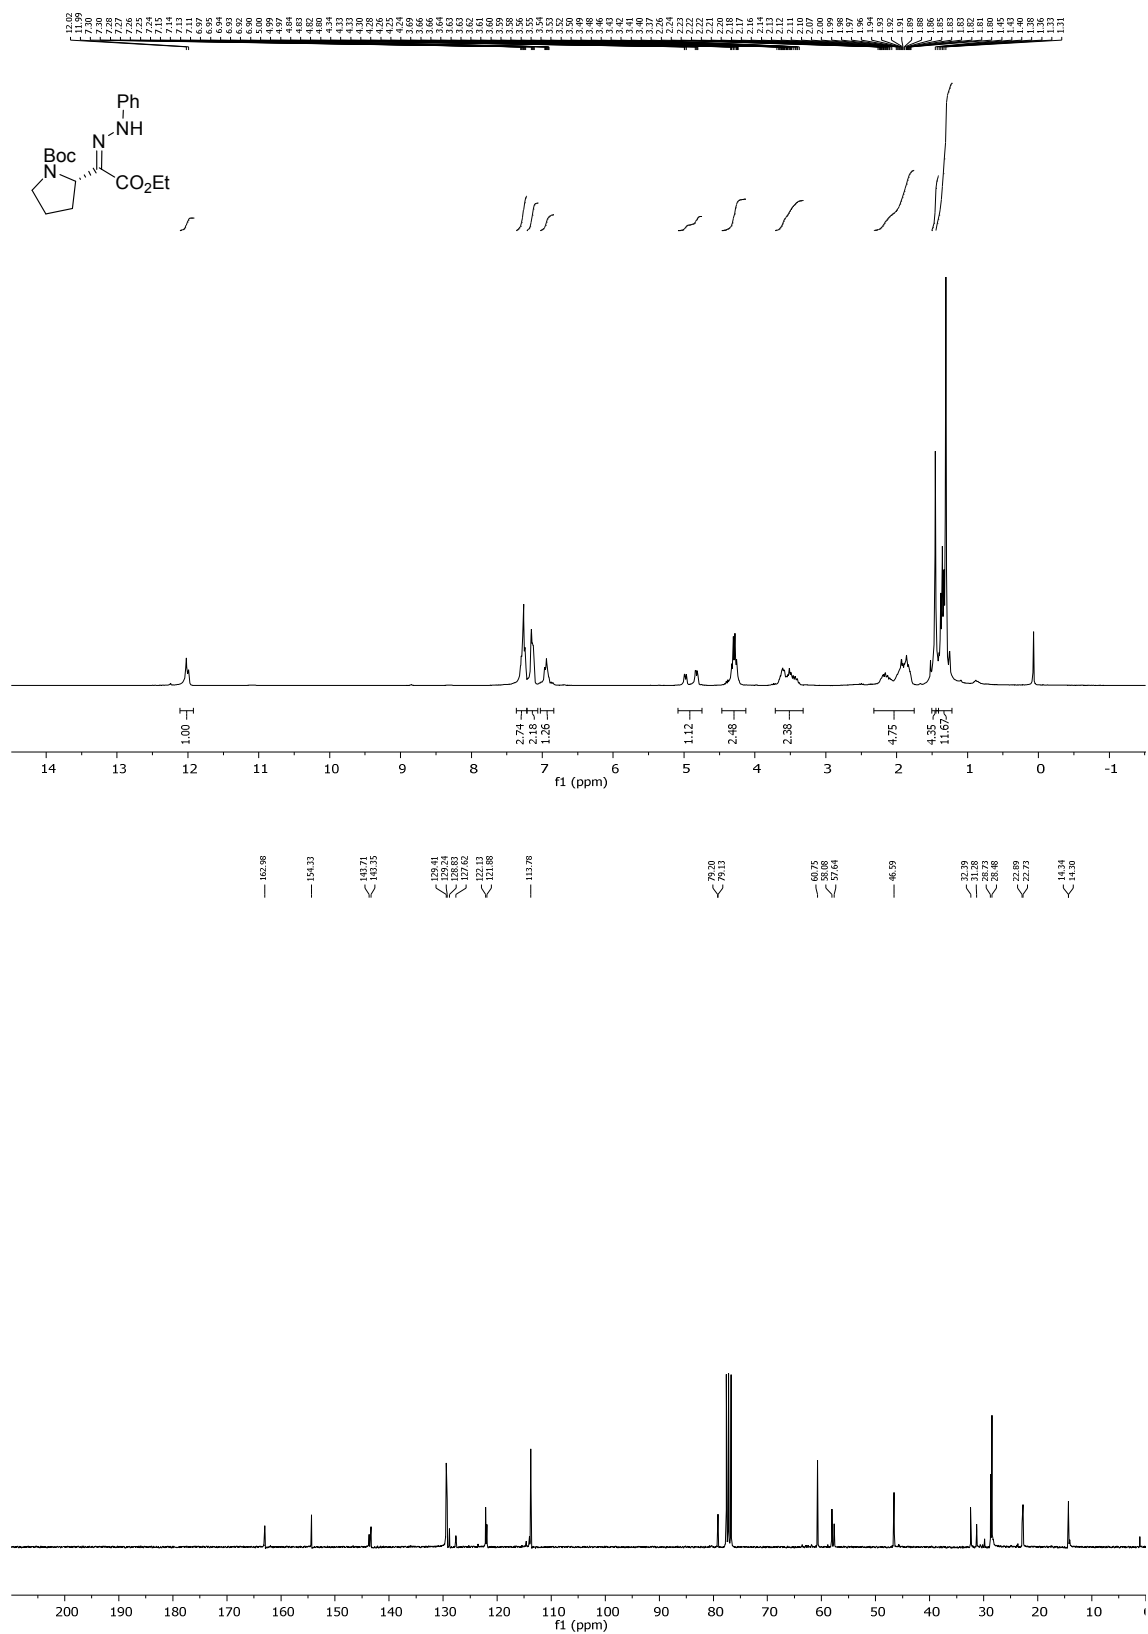

Figure SI-26. NMR spectra for compound **4c**



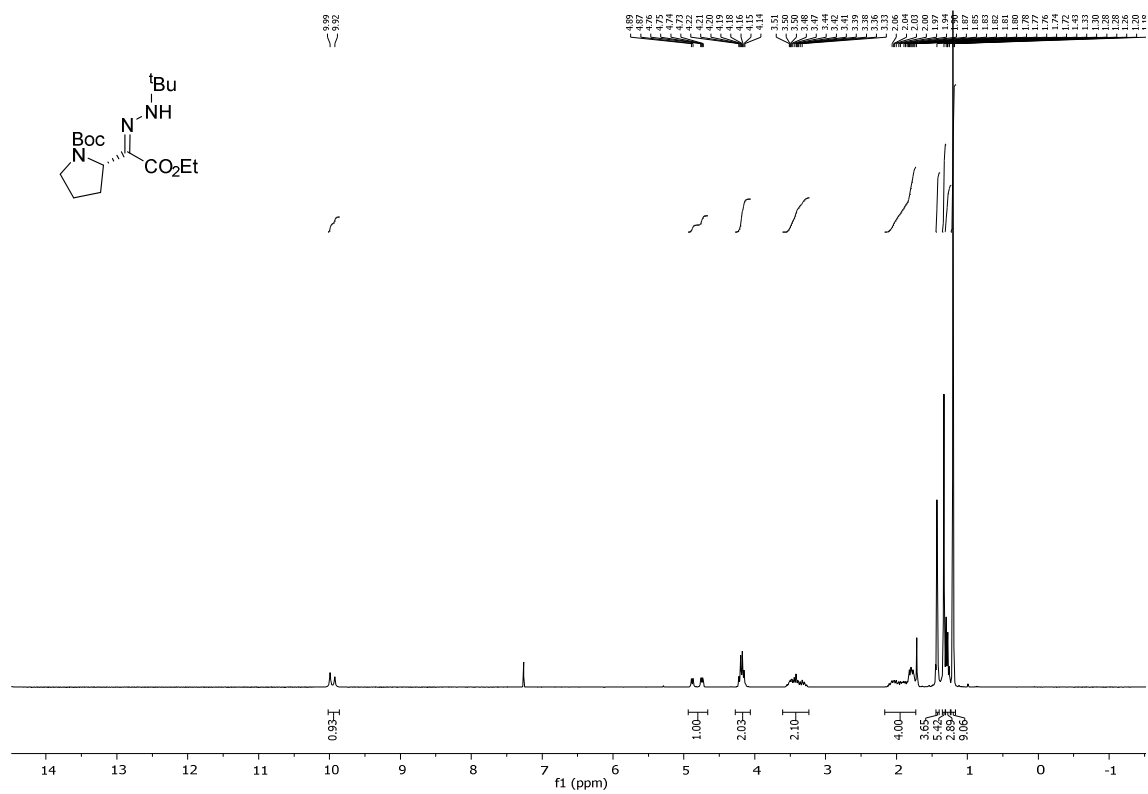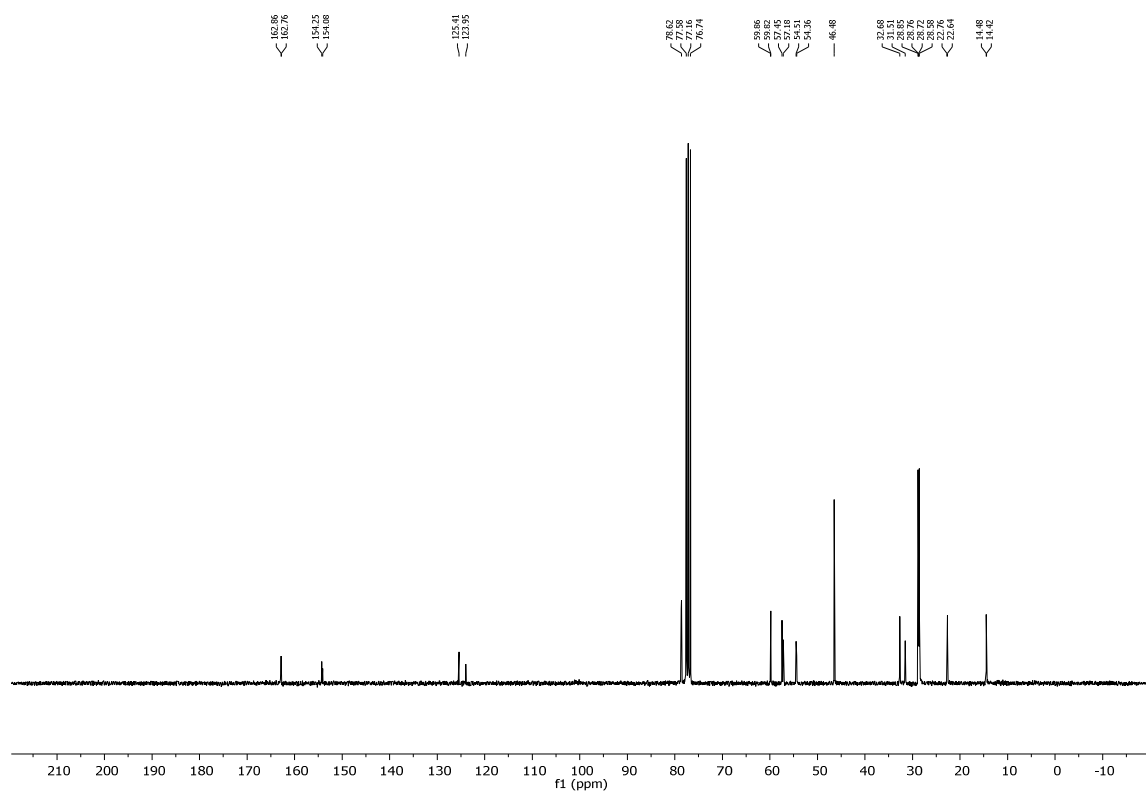

Figure SI-27. NMR spectra for compound **4e**

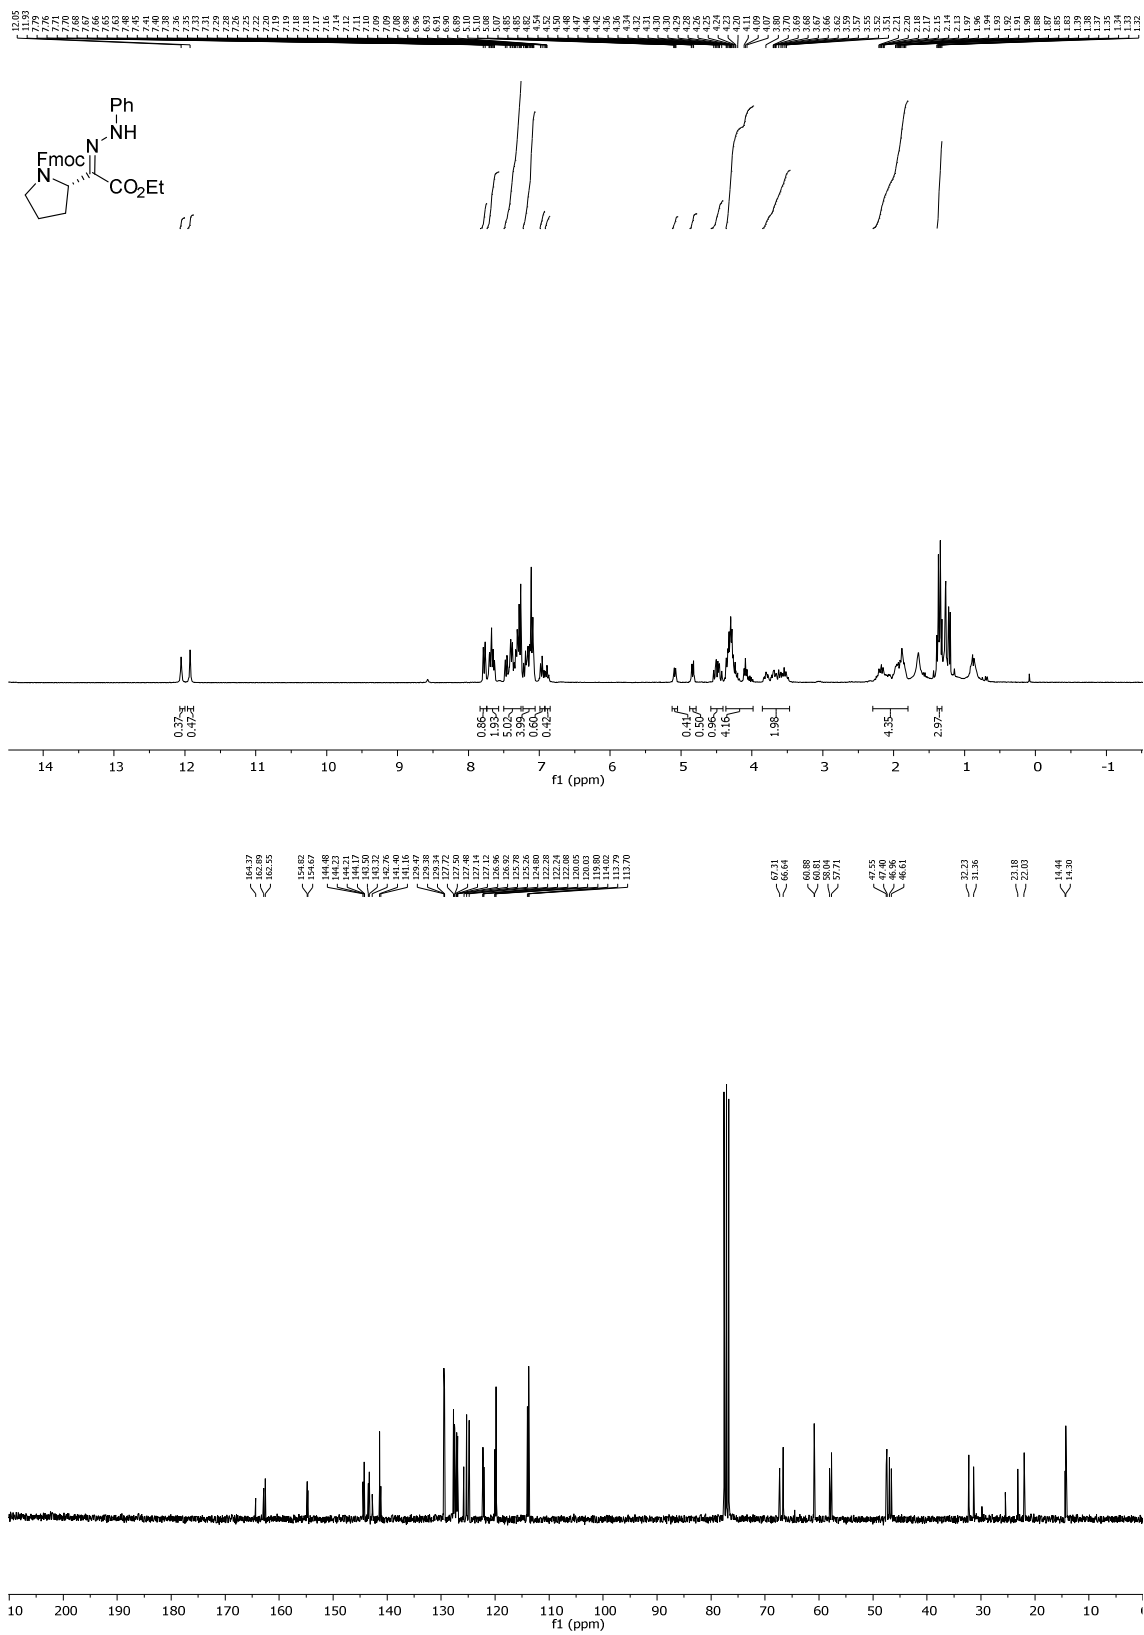

Figure SI-28. NMR spectra for compound 4f

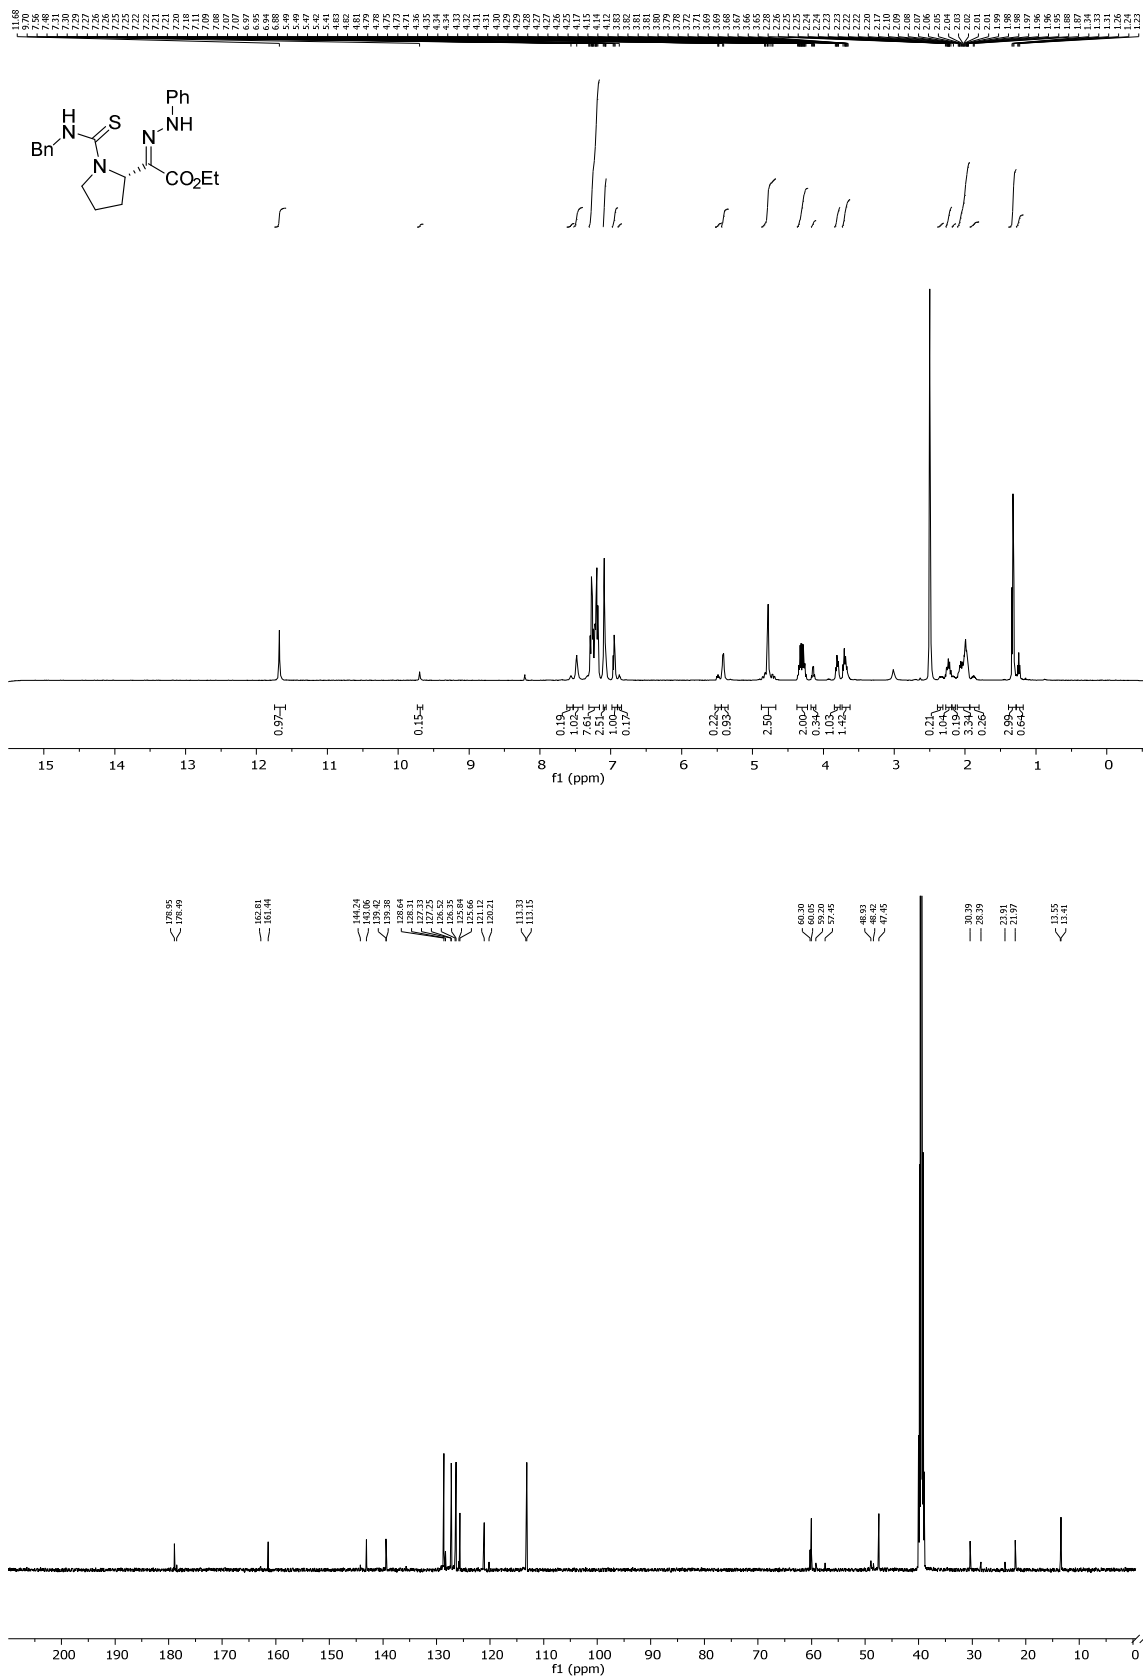

Figure SI-29. NMR spectra for compound **4h** (DMSO-*d*<sub>6</sub>, 100°C)



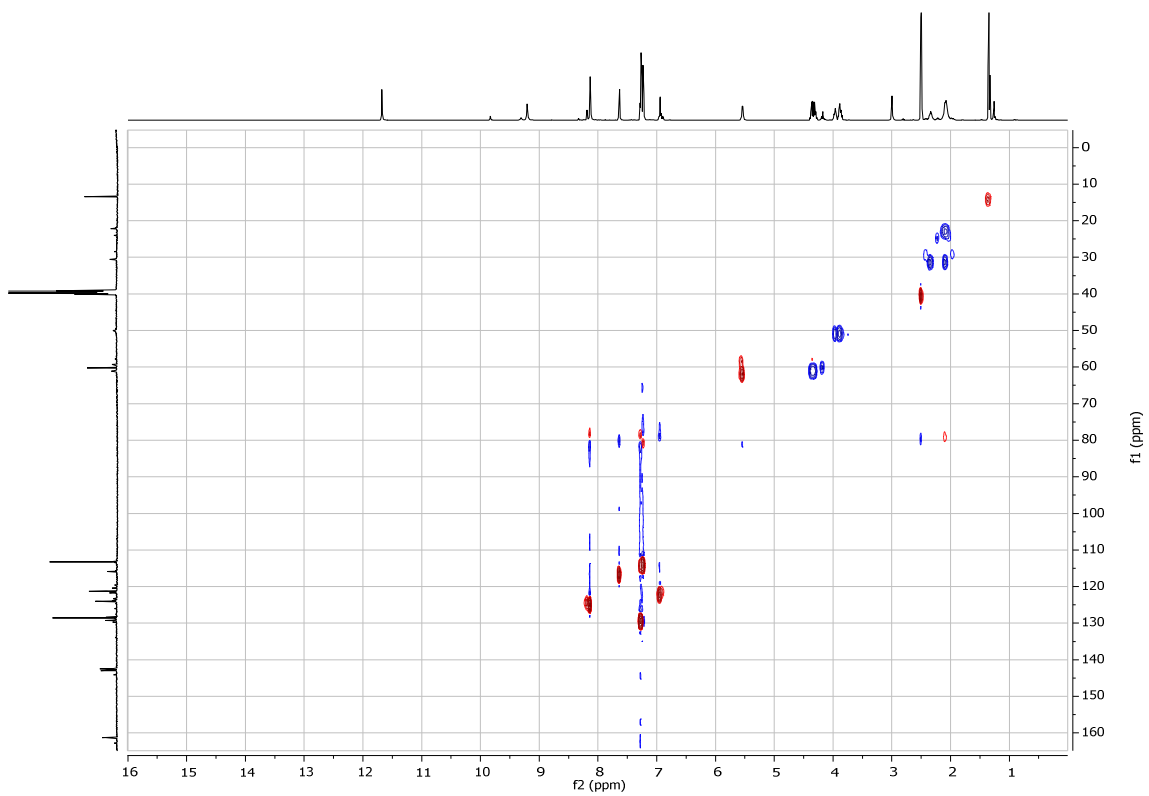

HSQC 4i

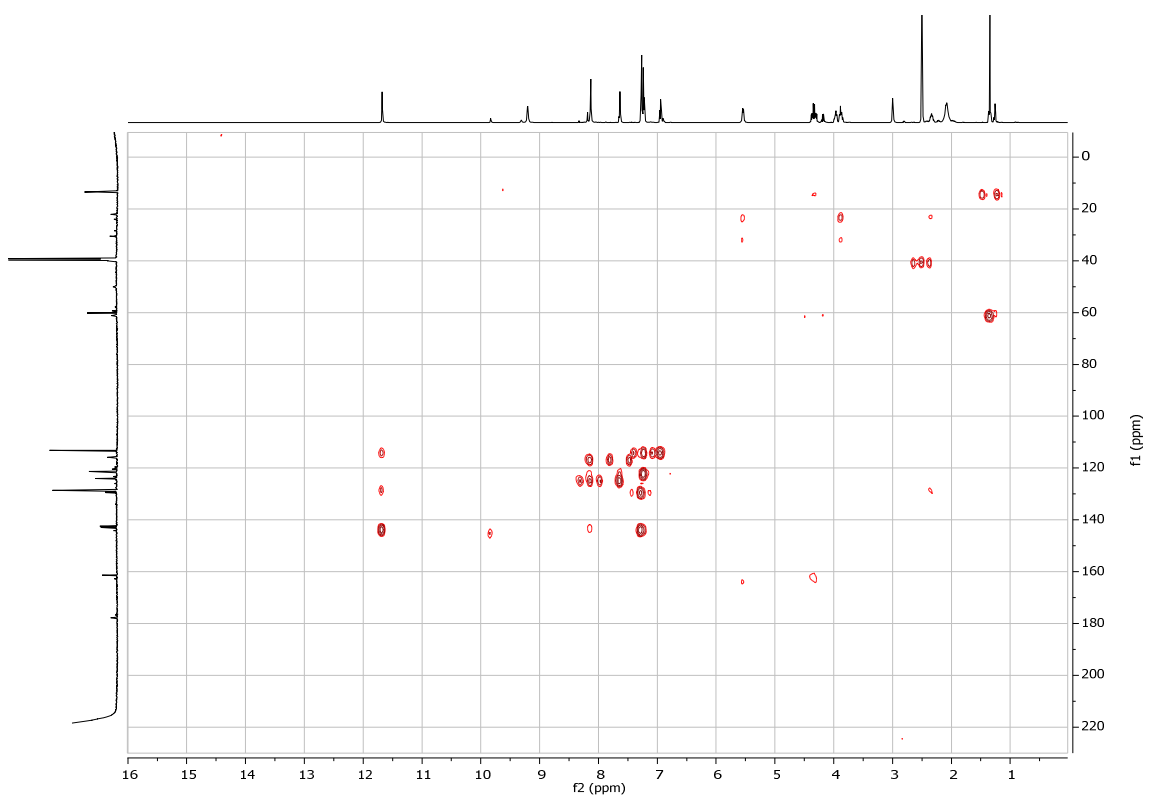

HMBC 4i

Figure SI-30. NMR spectra for compound **4i** (DMSO-*d*<sub>6</sub>, 100°C)



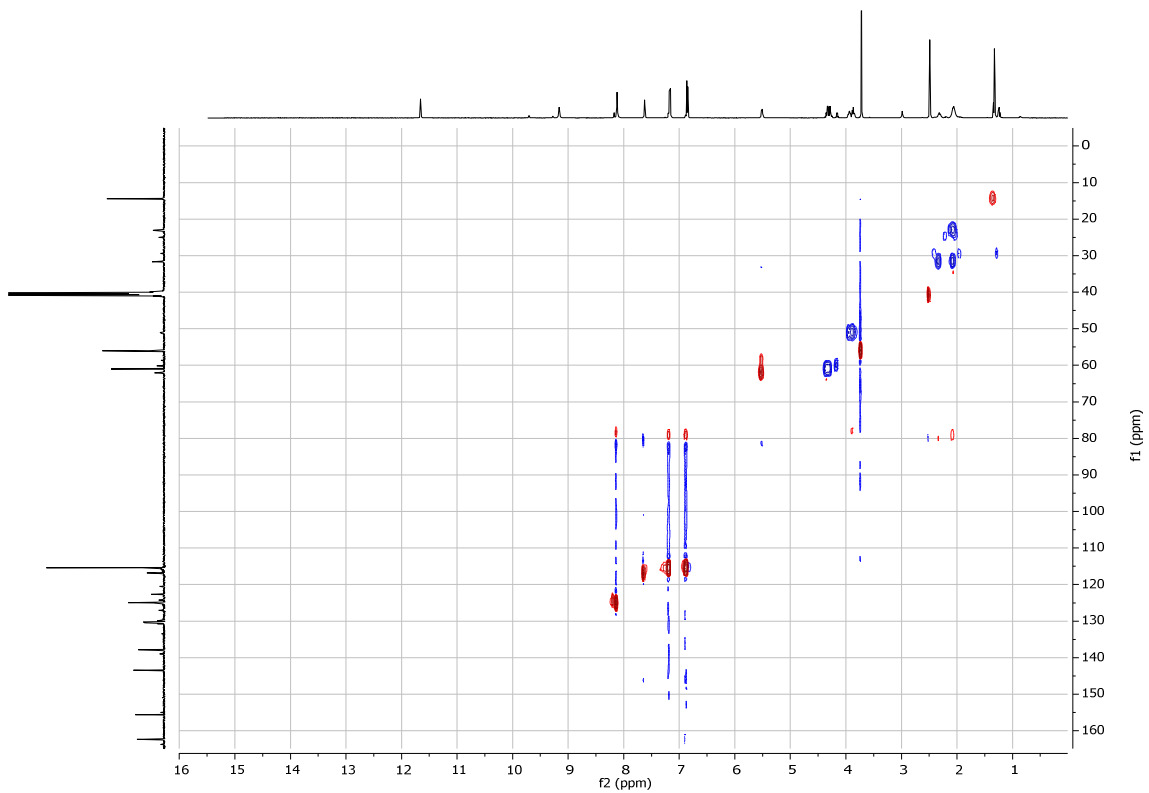

HSQC **4j**

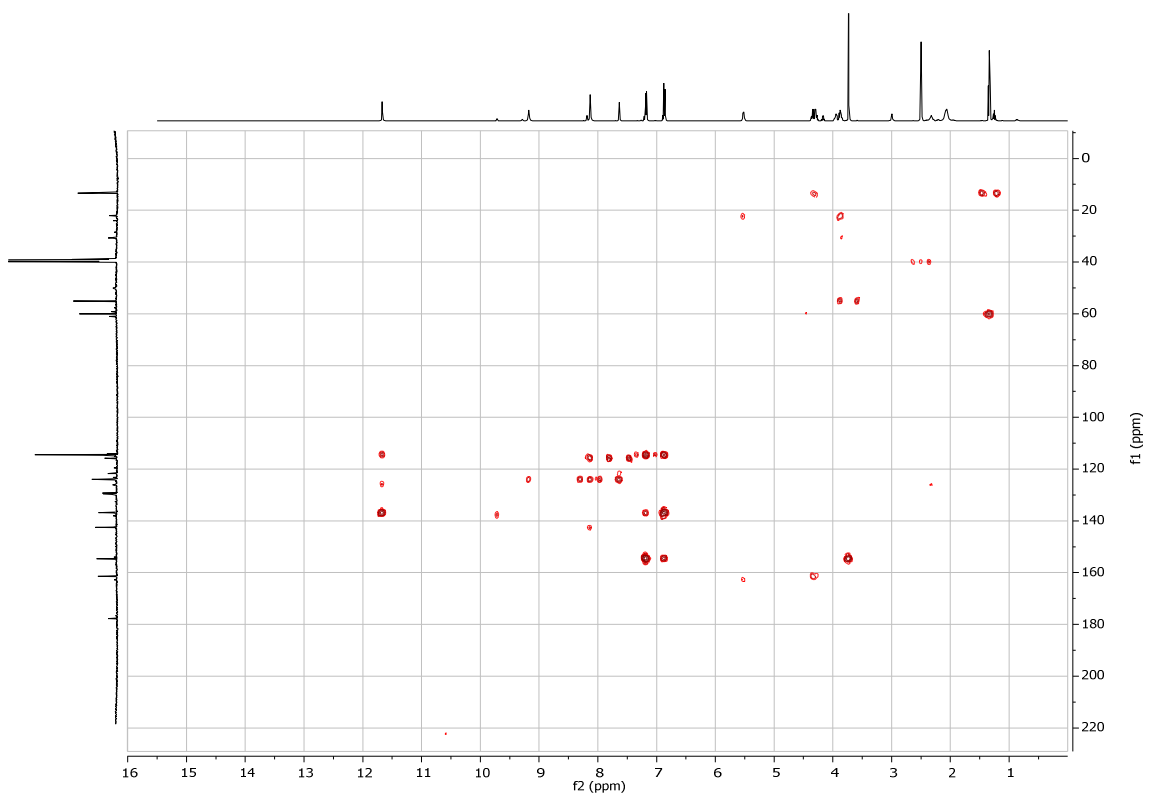

HMBC **4j**

**Figure SI-31.** NMR spectra for compound **4j** (DMSO-*d*<sub>6</sub>, 100°C)

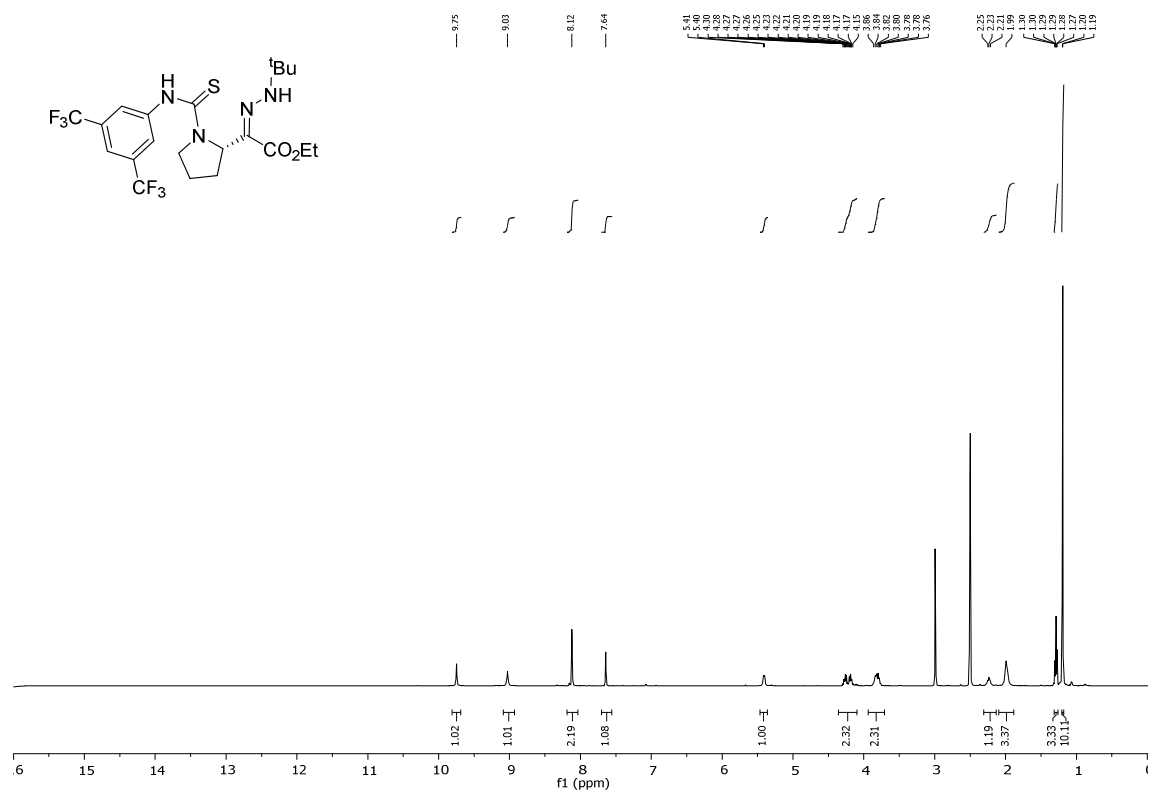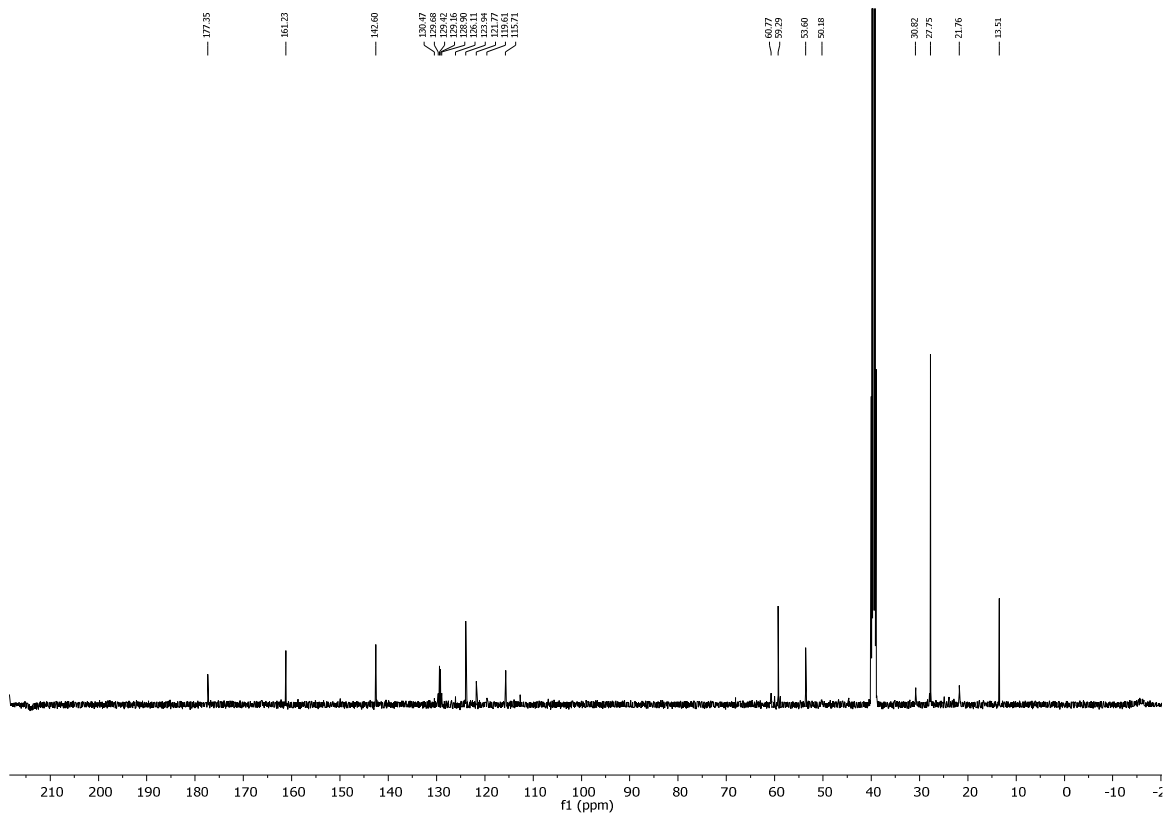



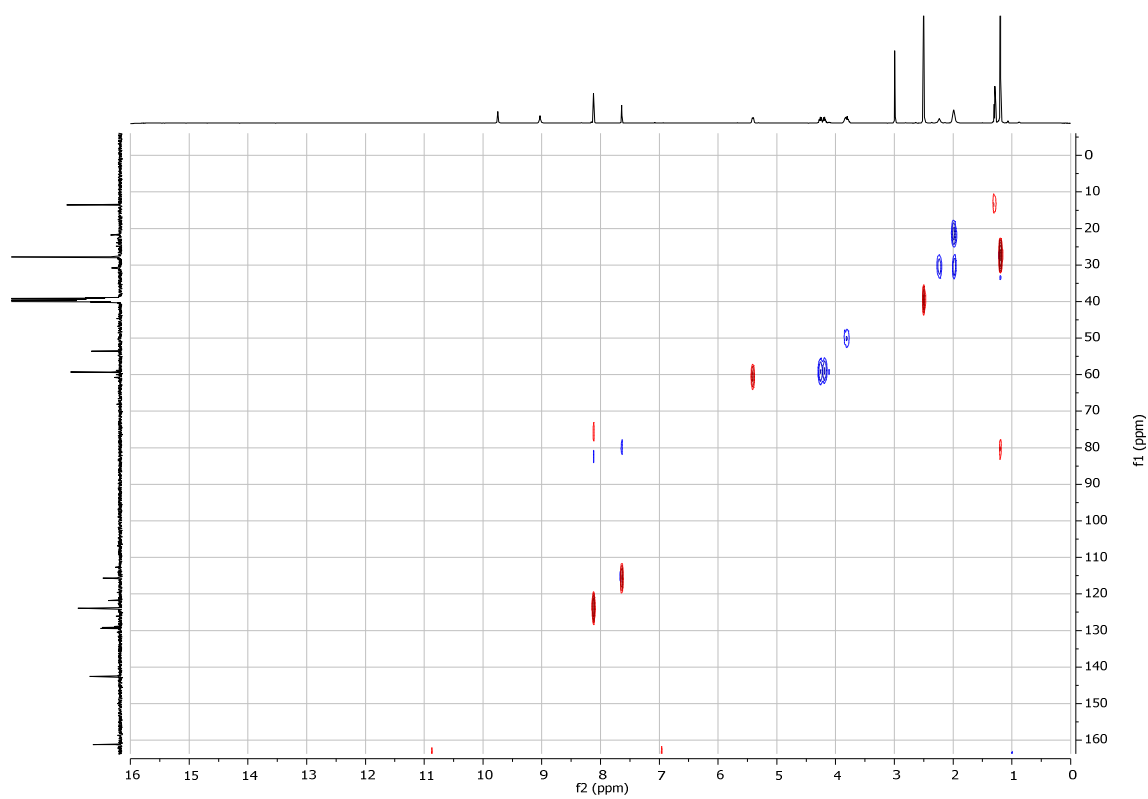

HSQC 4k

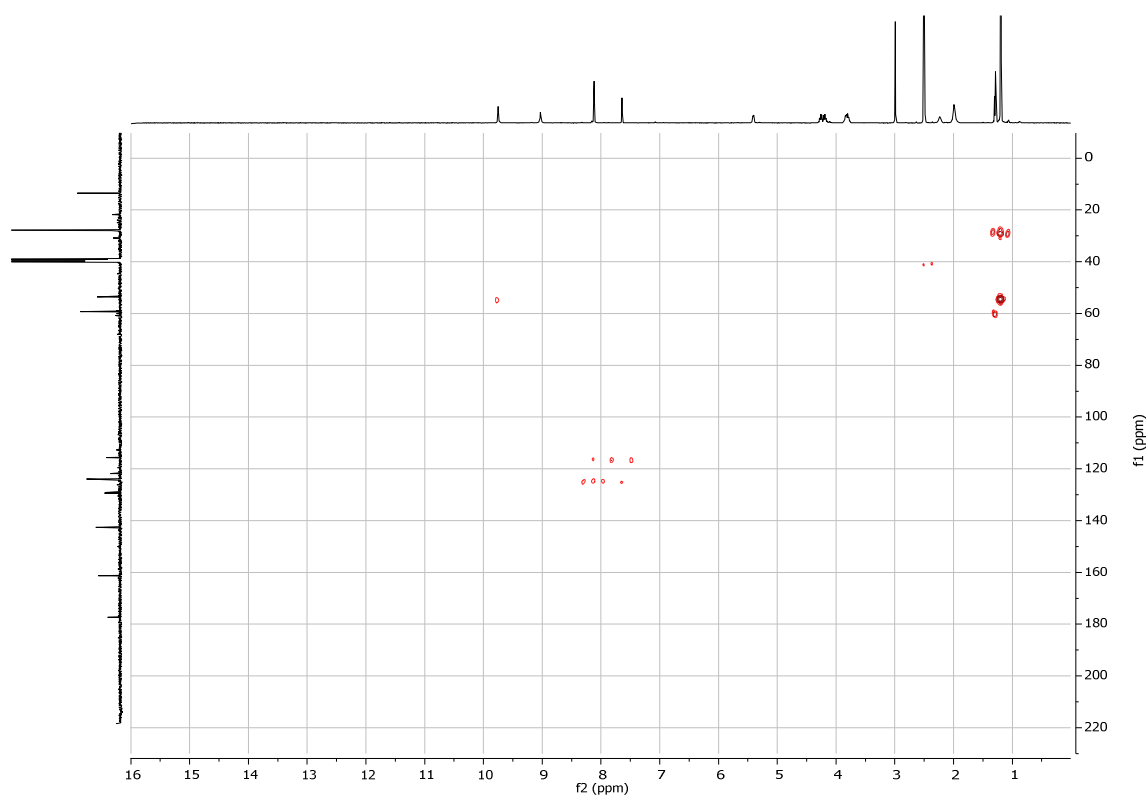

HMBC 4k

Figure SI-32. NMR spectra for compound **4k** (DMSO-*d*<sub>6</sub>, 100°C)



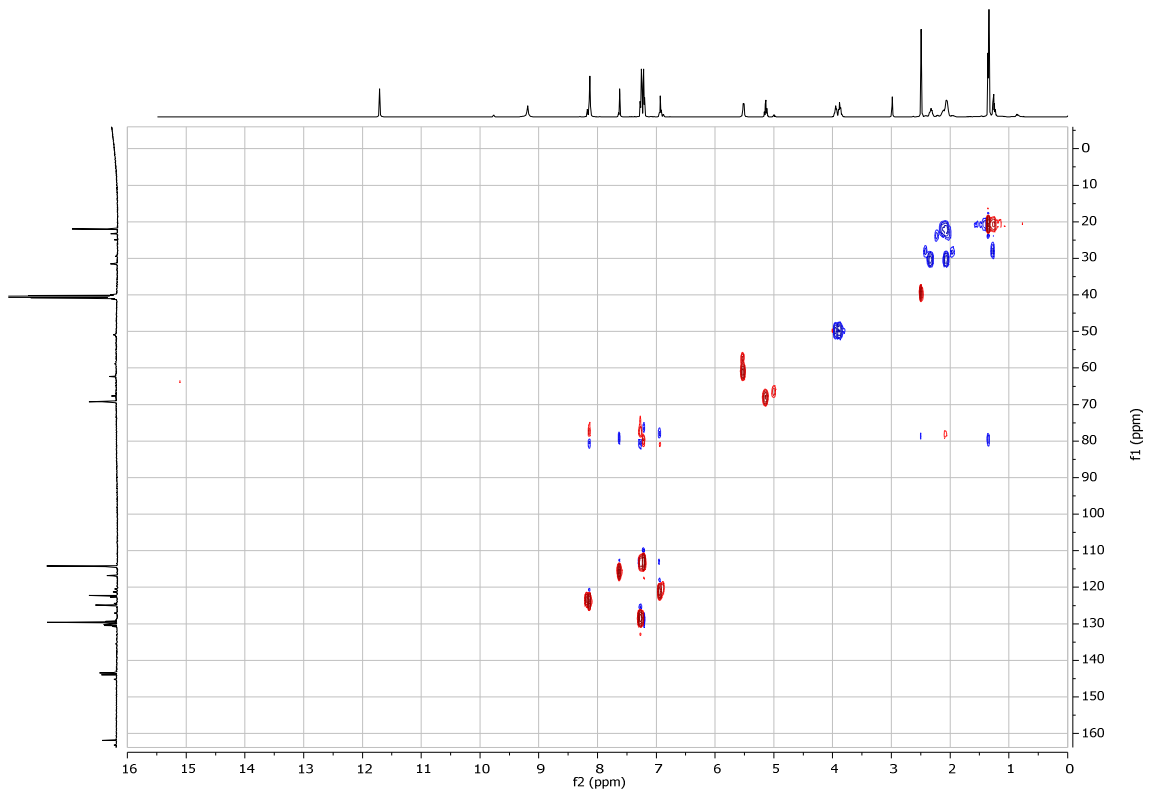

HSQC 41

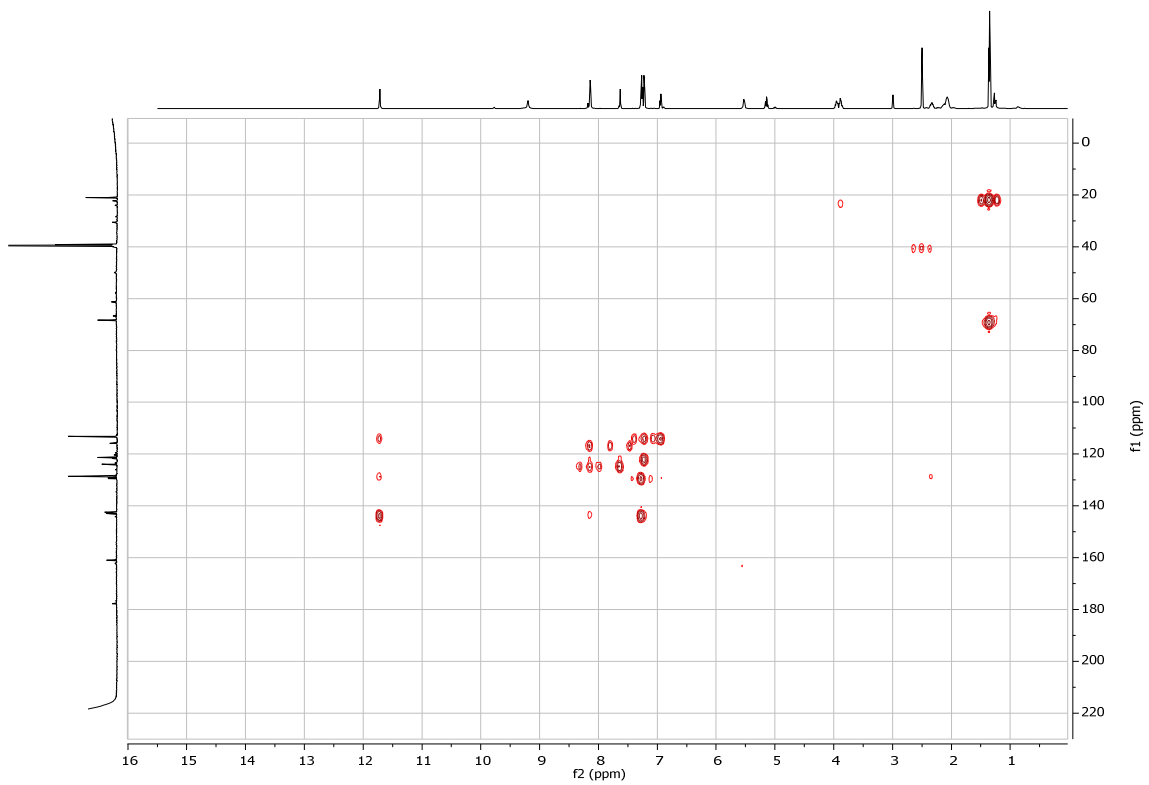

HMBC 41

Figure SI-33. NMR spectra for compound 41 (DMSO-*d*<sub>6</sub>, 100°C)



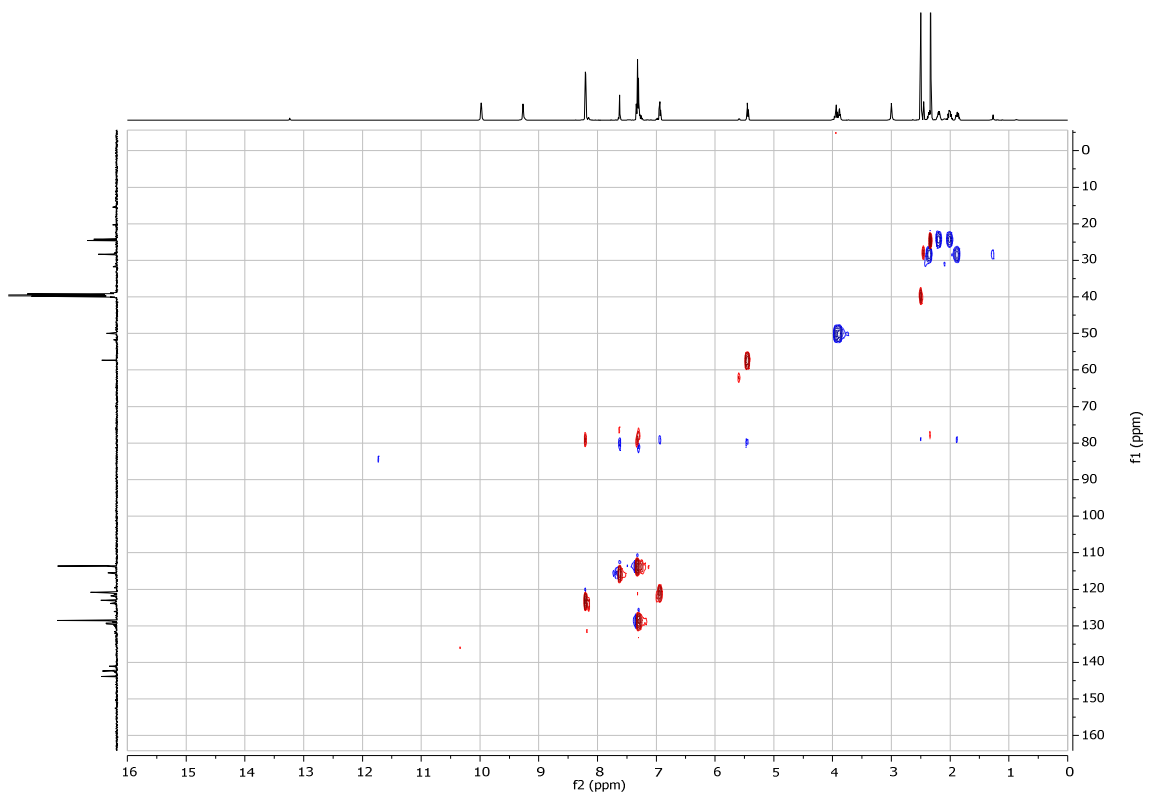

HSQC 4m

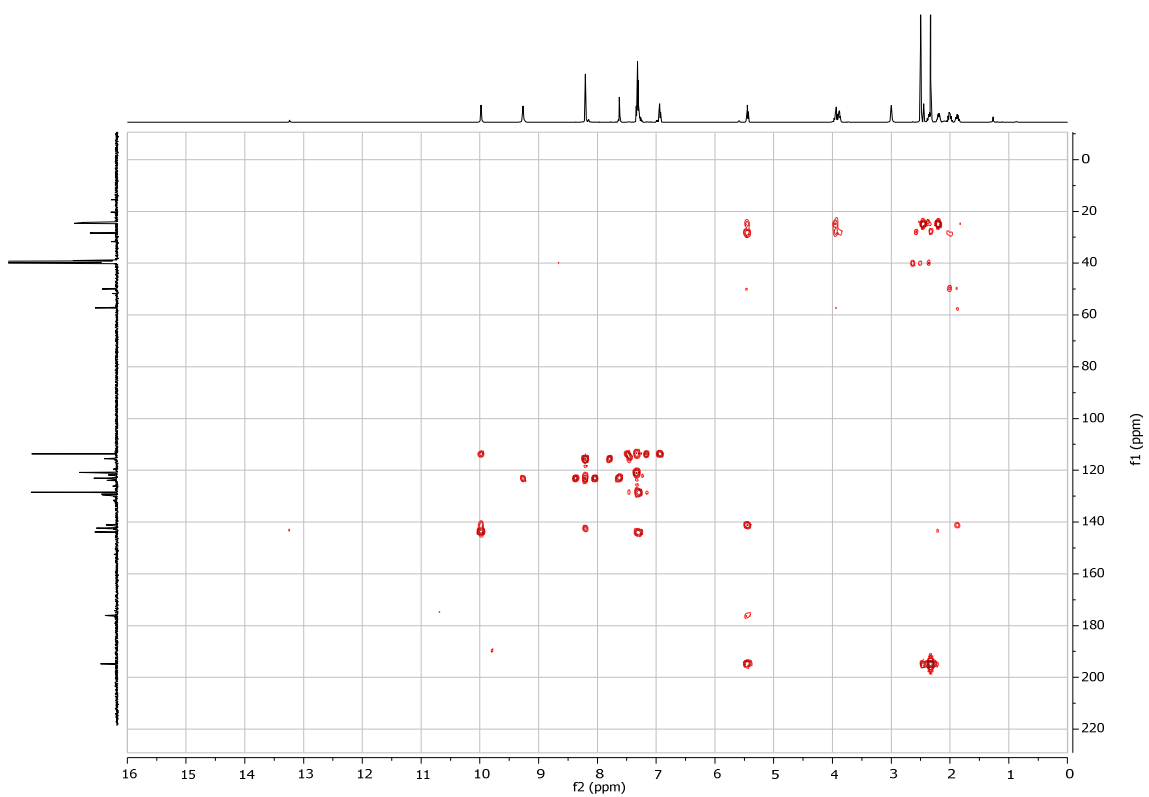

HMBC 4m

Figure SI-34. NMR spectra for compound 4m (DMSO-*d*<sub>6</sub>, 100°C)

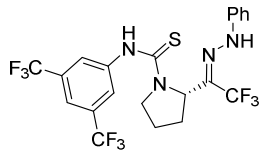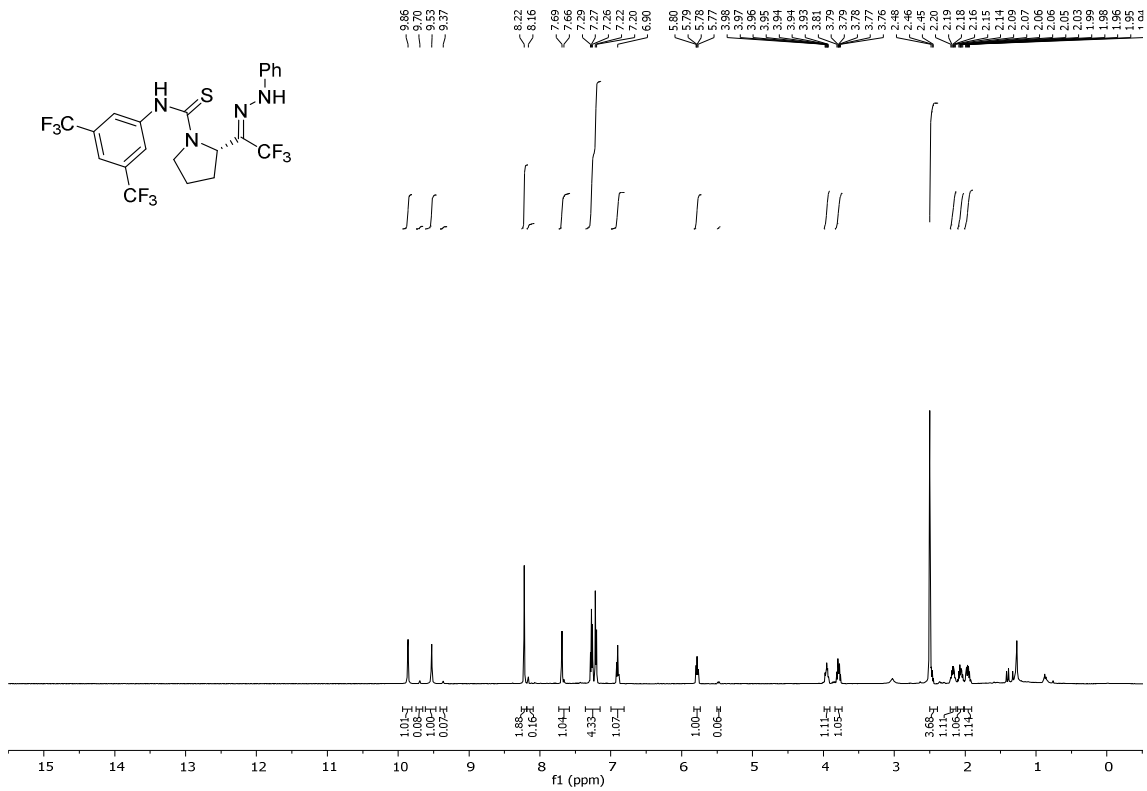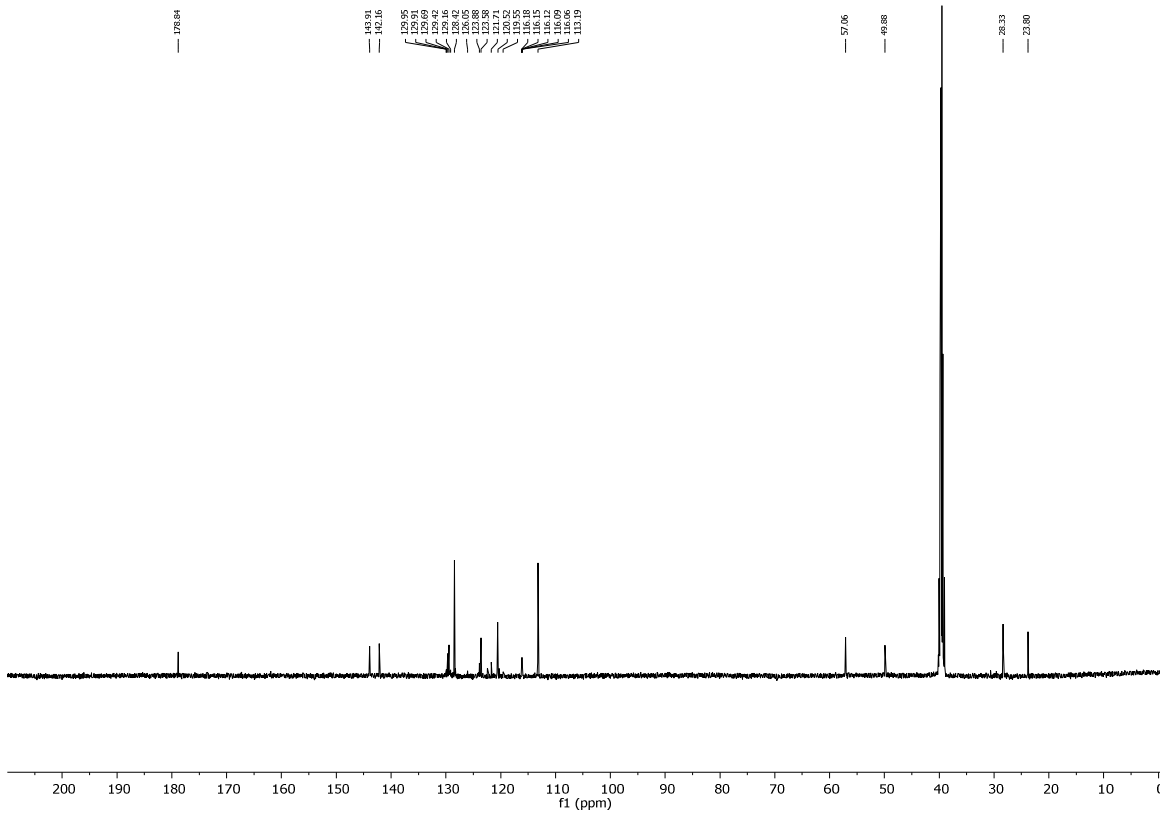

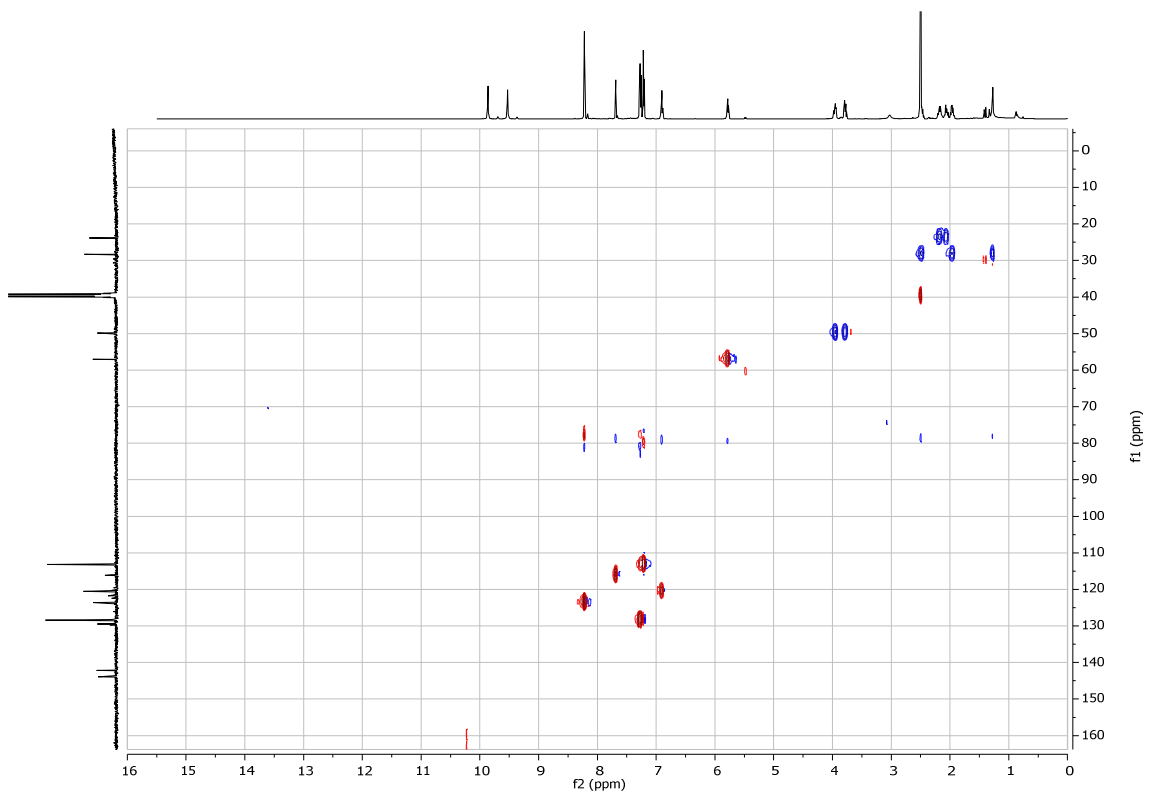

HSQC **4n**

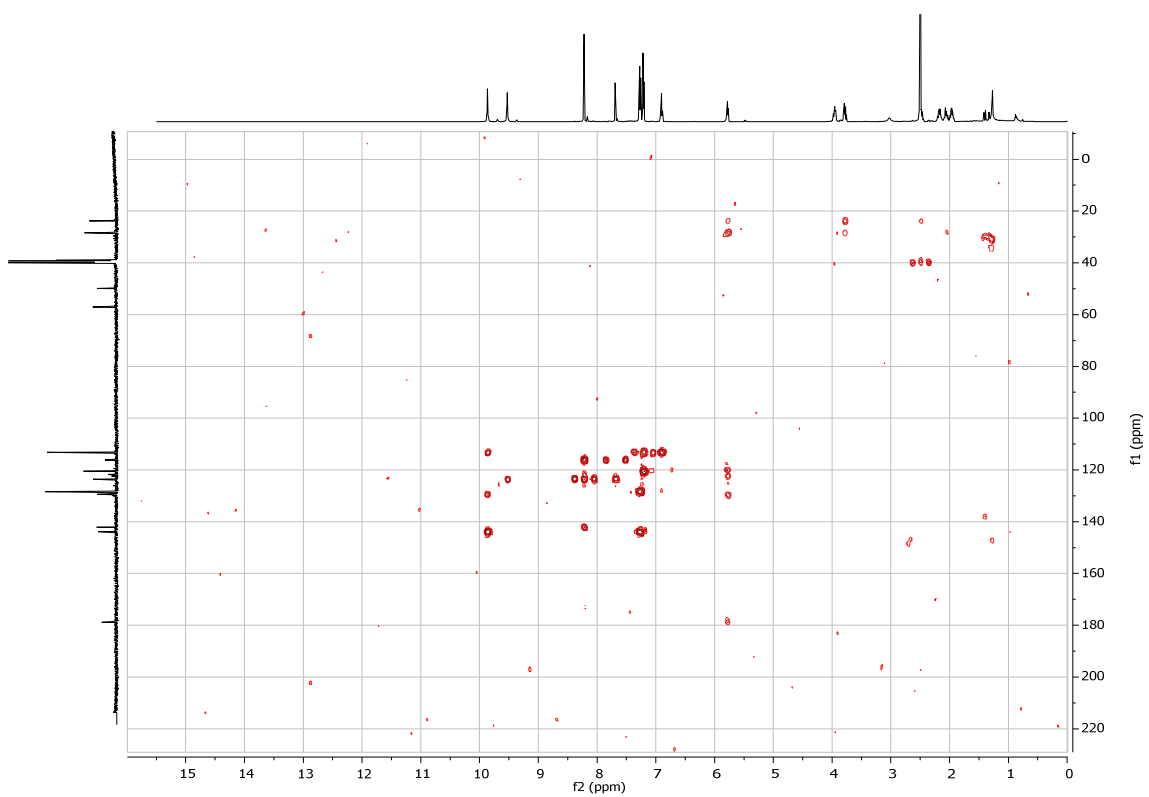

HMBC **4n**

Figure SI-35. NMR spectra for compound **4n** (DMSO-*d*<sub>6</sub>, 100°C)





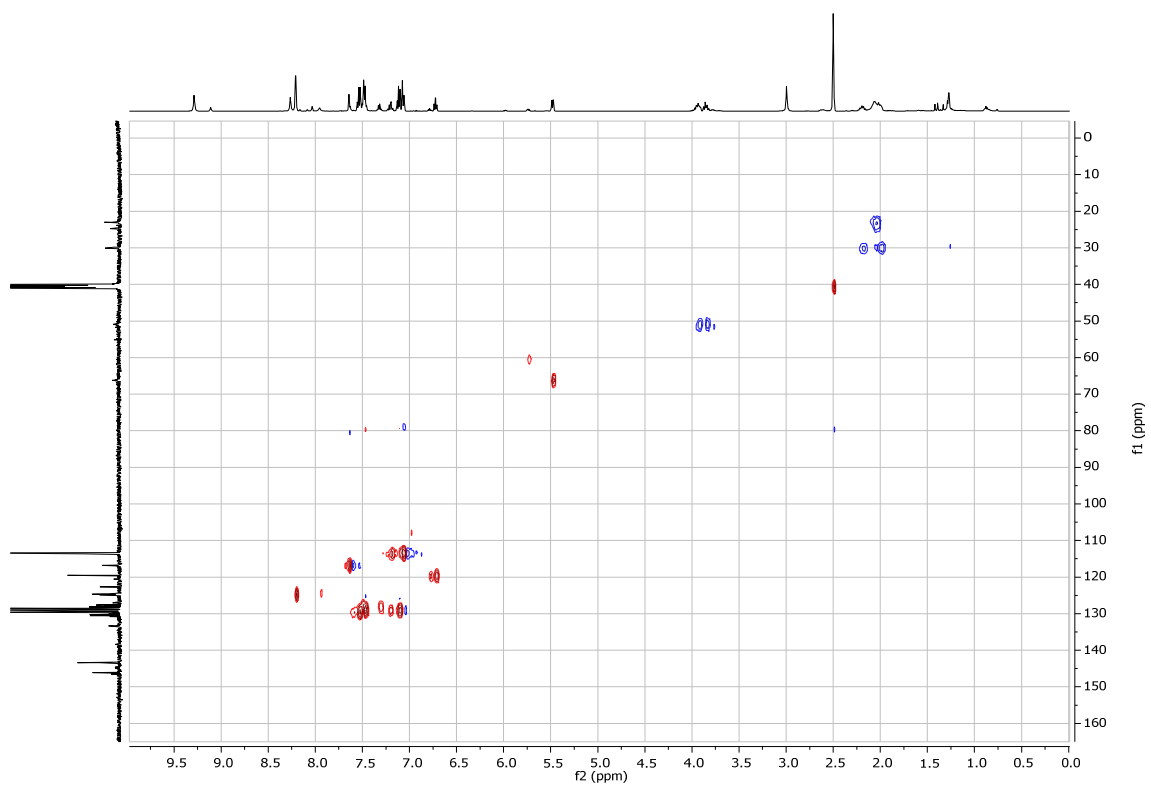

HSQC **4o**

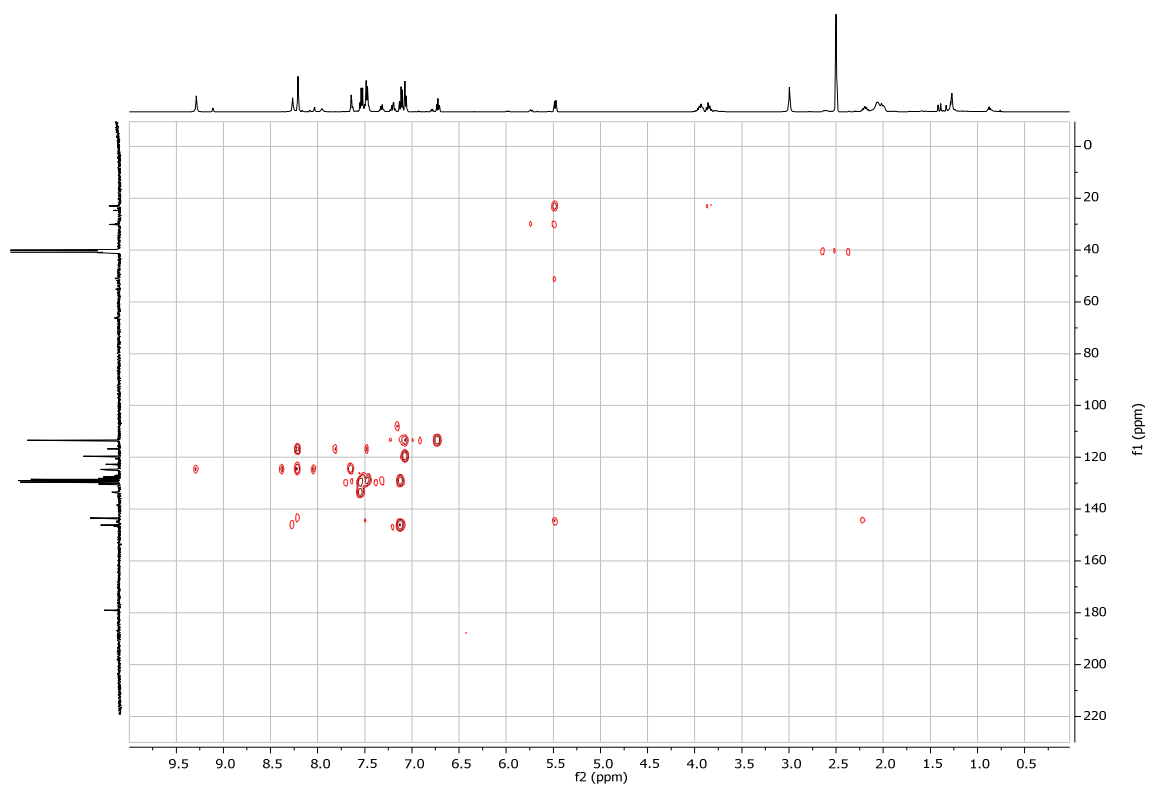

HMBC **4o**

Figure SI-36. NMR spectra for compound **4o** (DMSO-*d*<sub>6</sub>, 100°C)



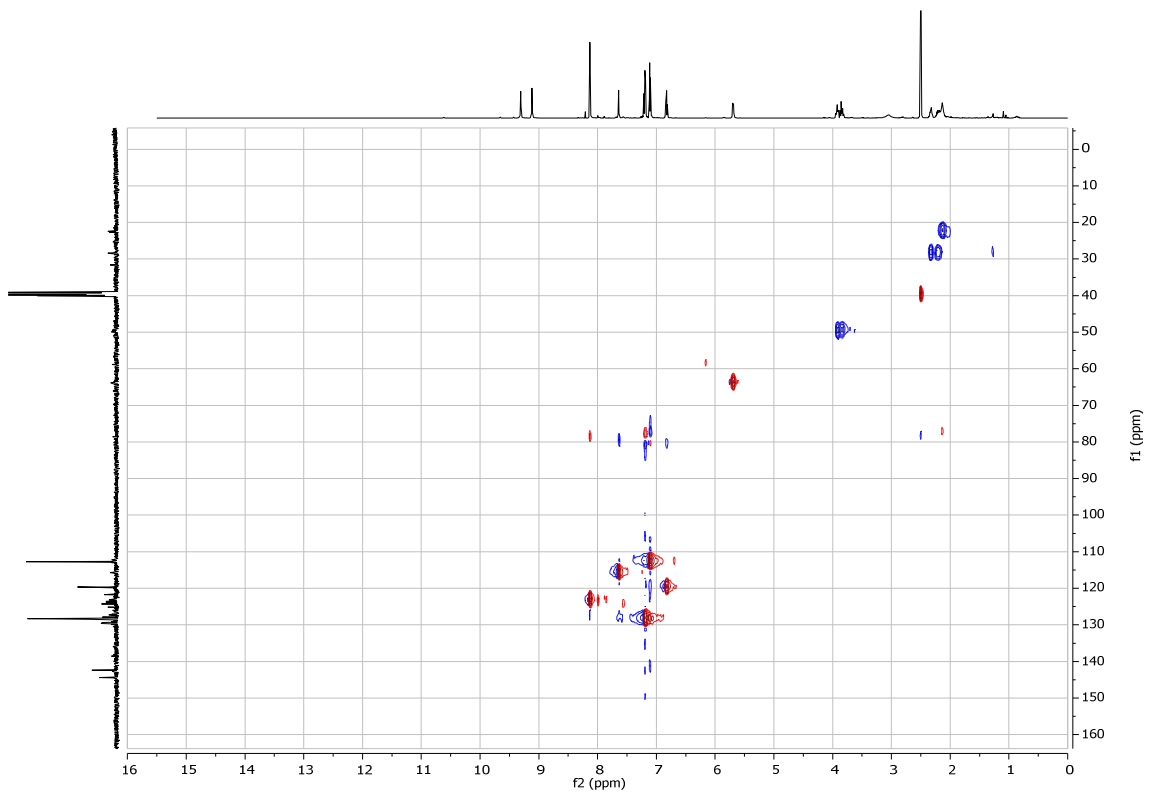

HSQC 4p

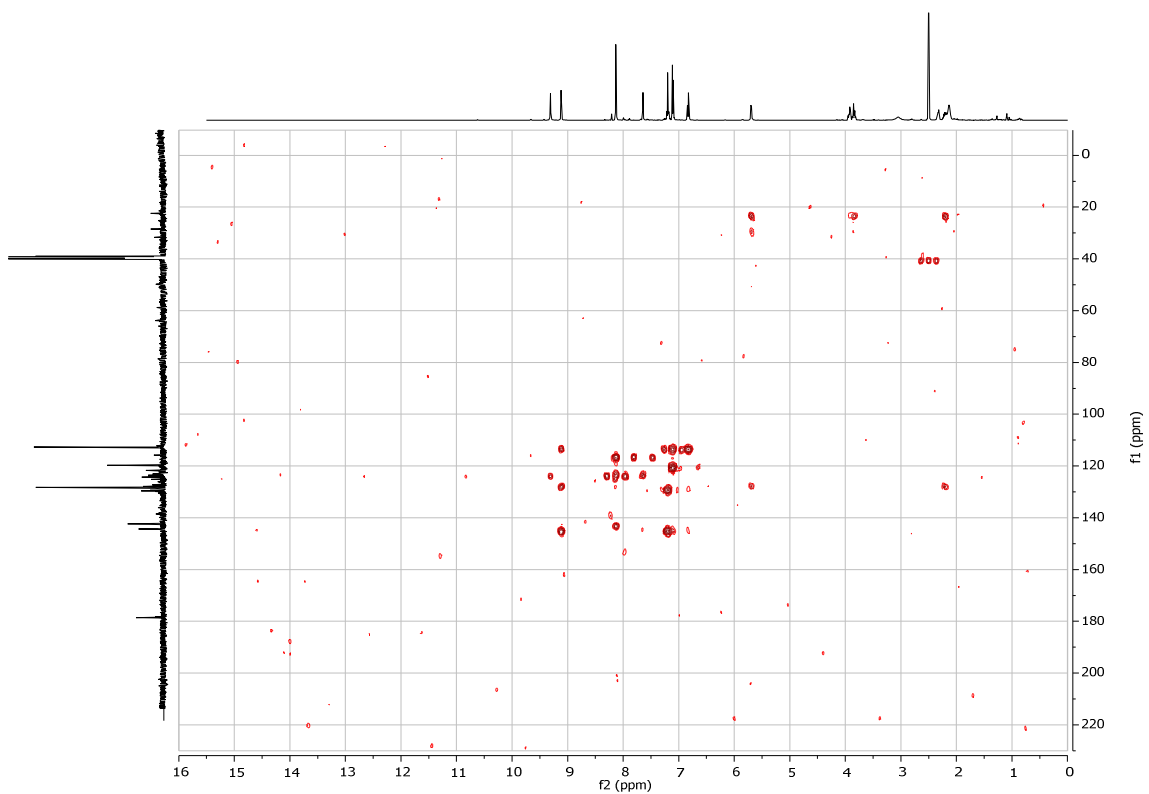

HMBC 4p

Figure SI-37. NMR spectra for compound 4p (DMSO-*d*<sub>6</sub>, 100°C)

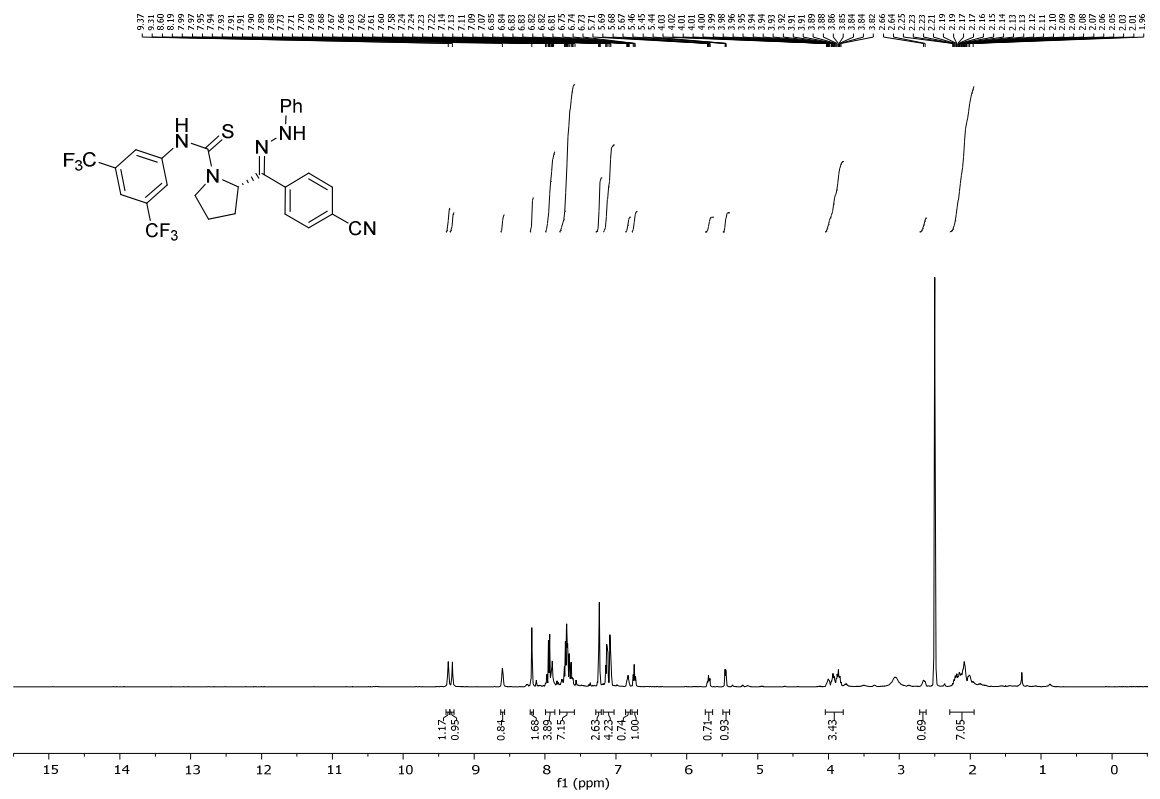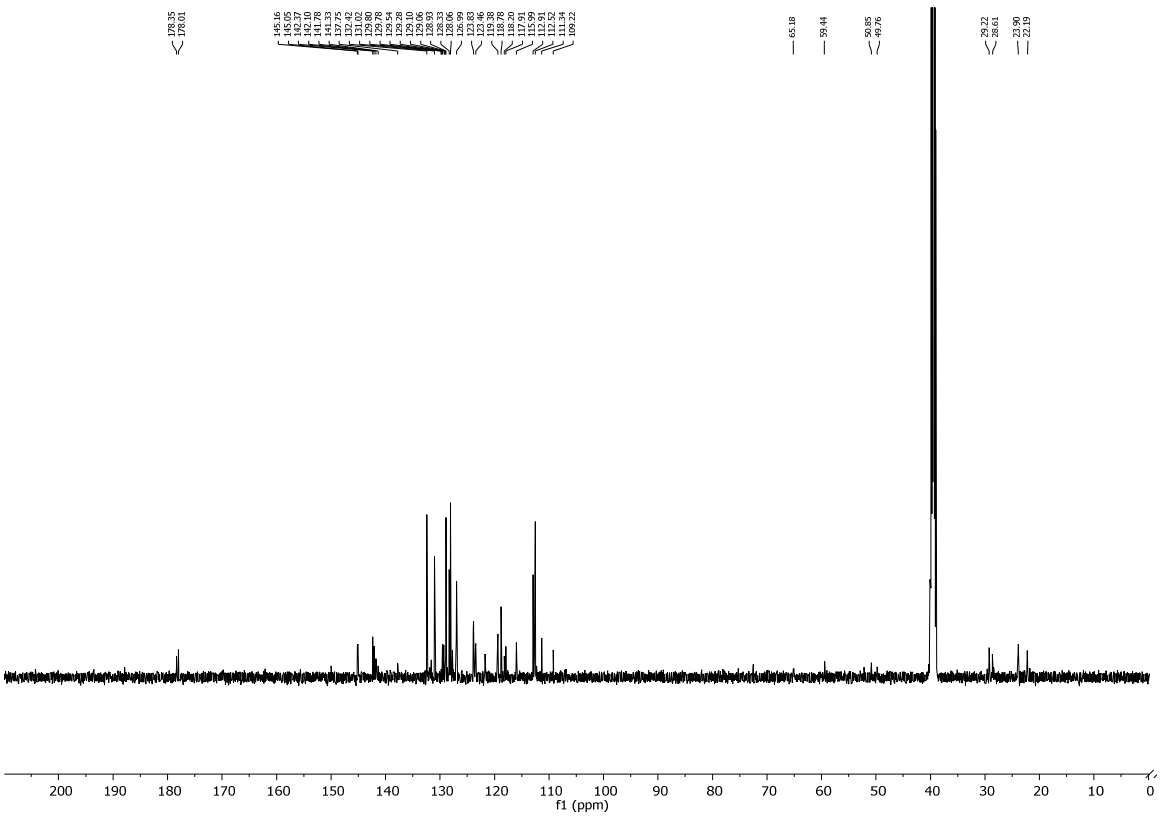

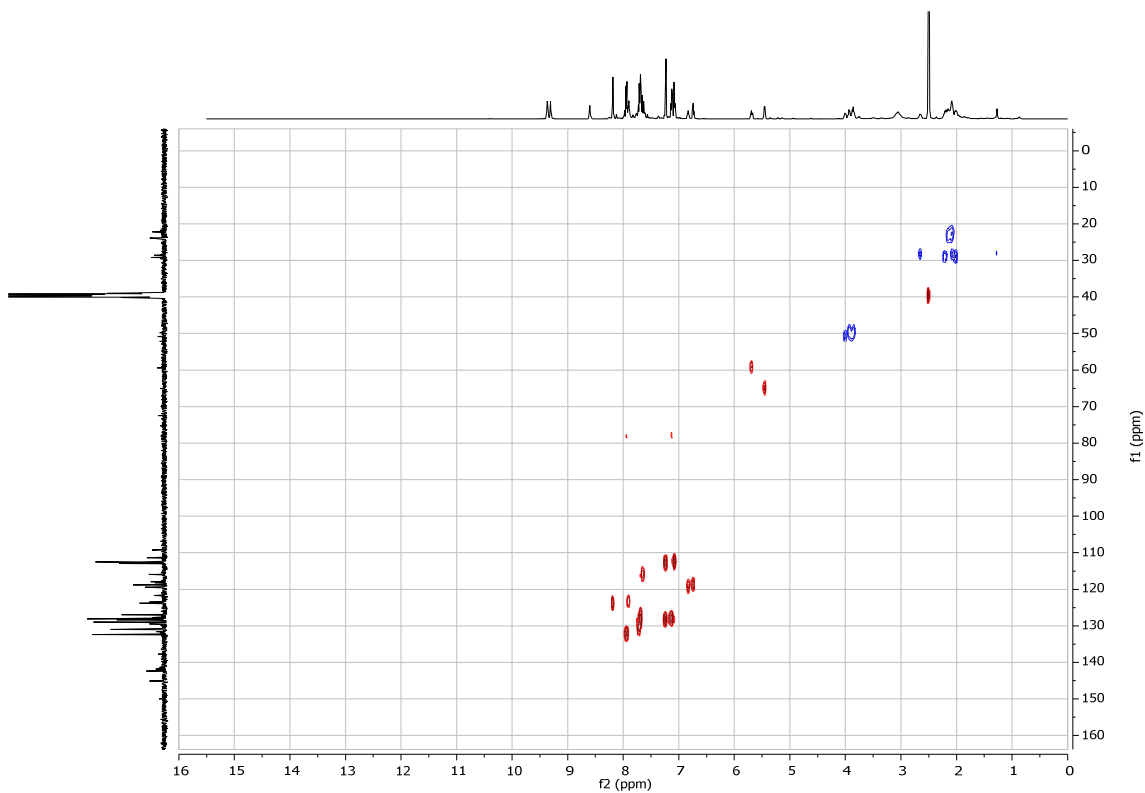

HSQC 4q

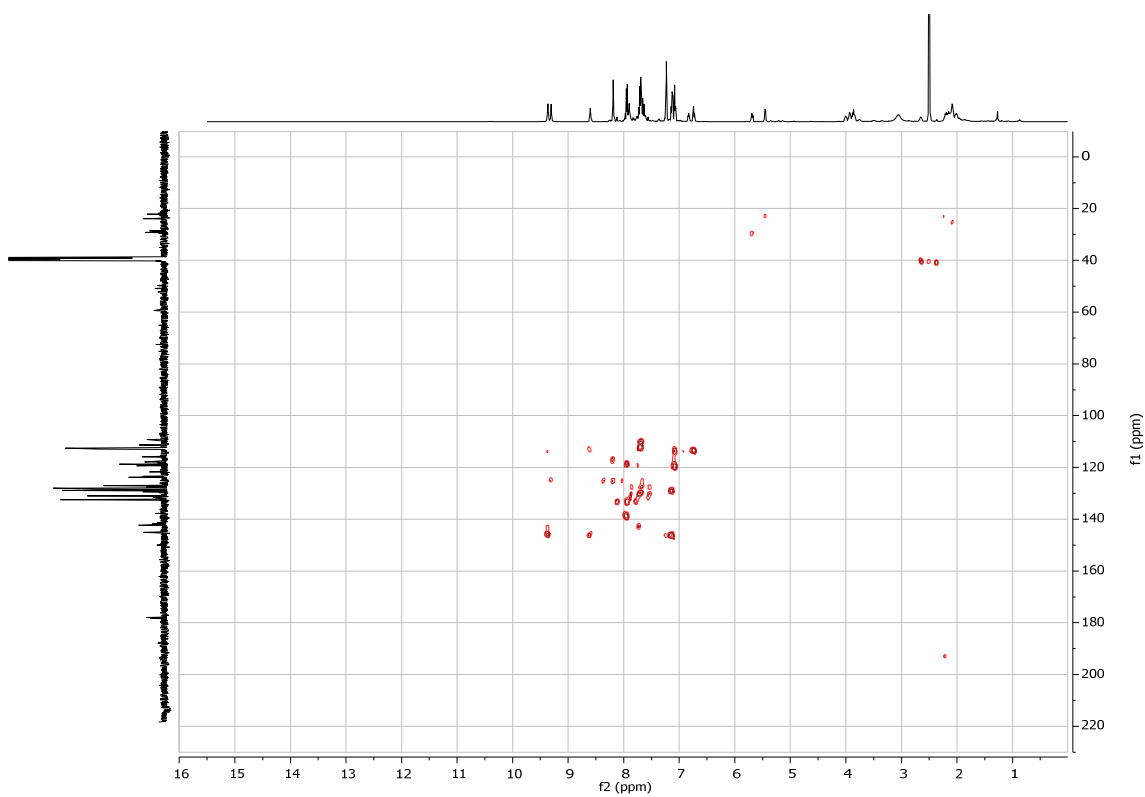

HMBC 4q

Figure SI-38. NMR spectra for compound **4q** (DMSO- $d_6$ , 100°C)

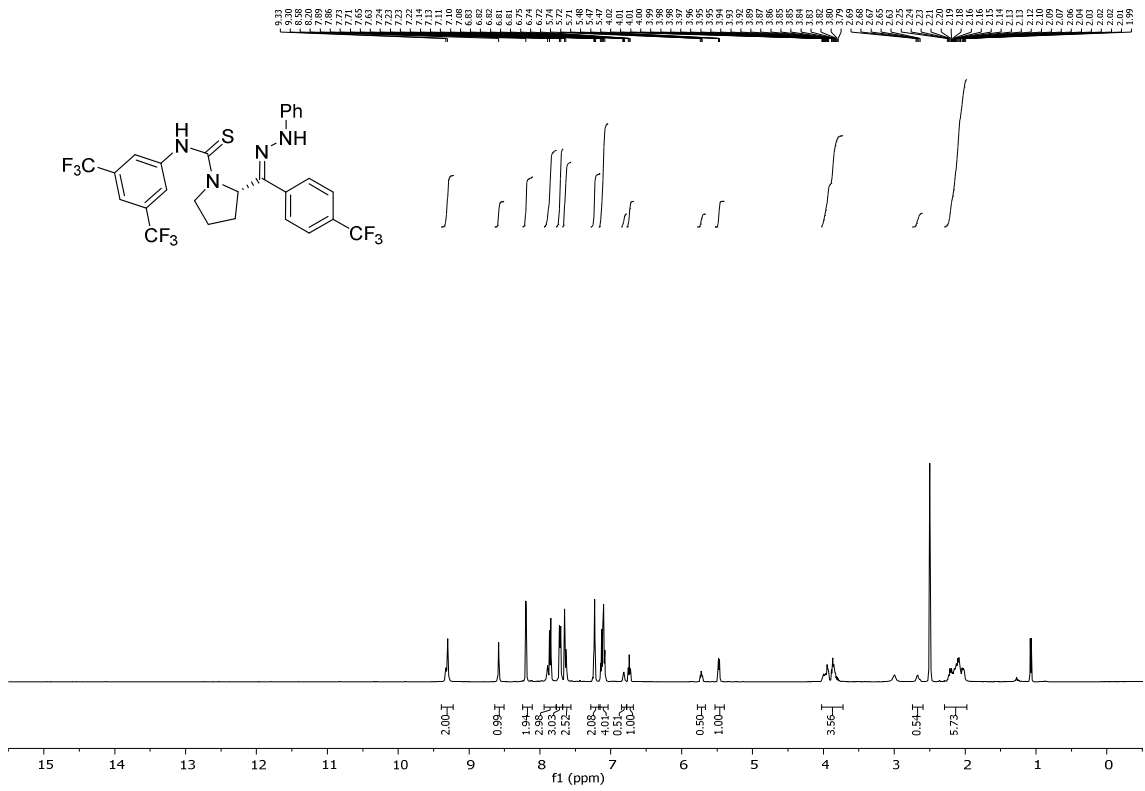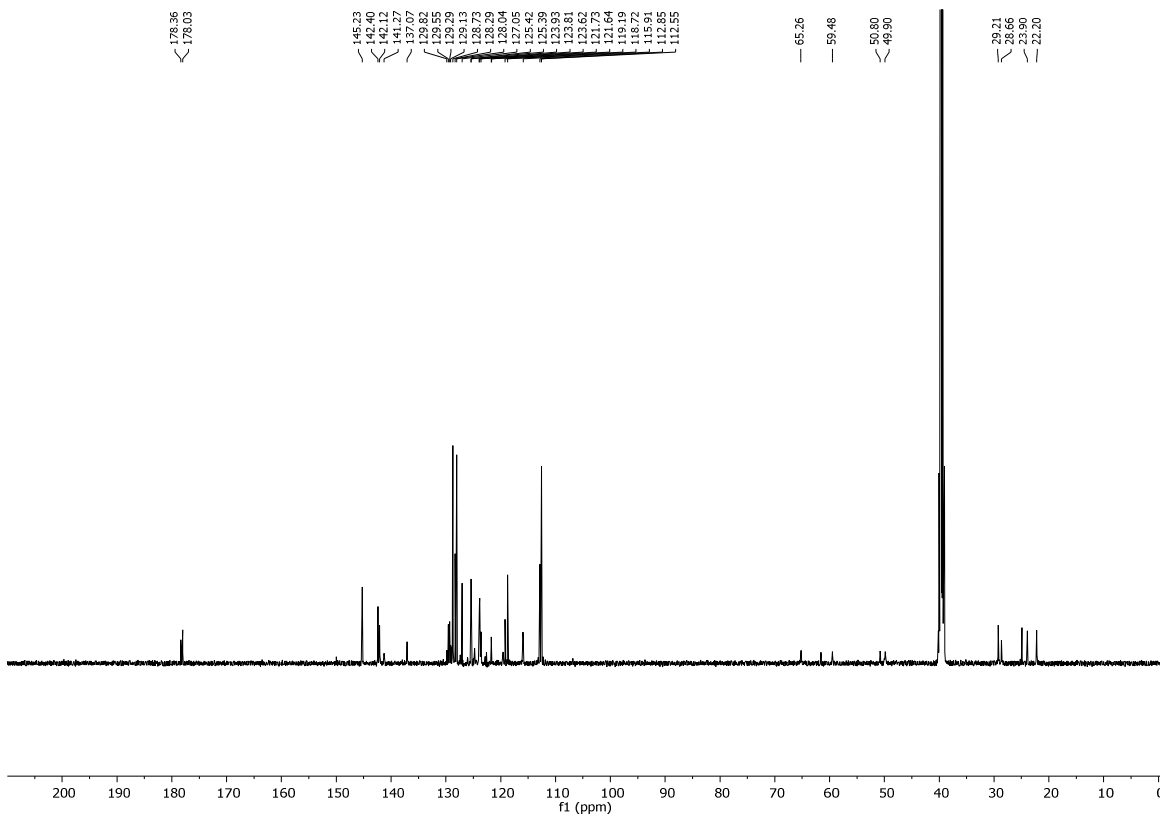

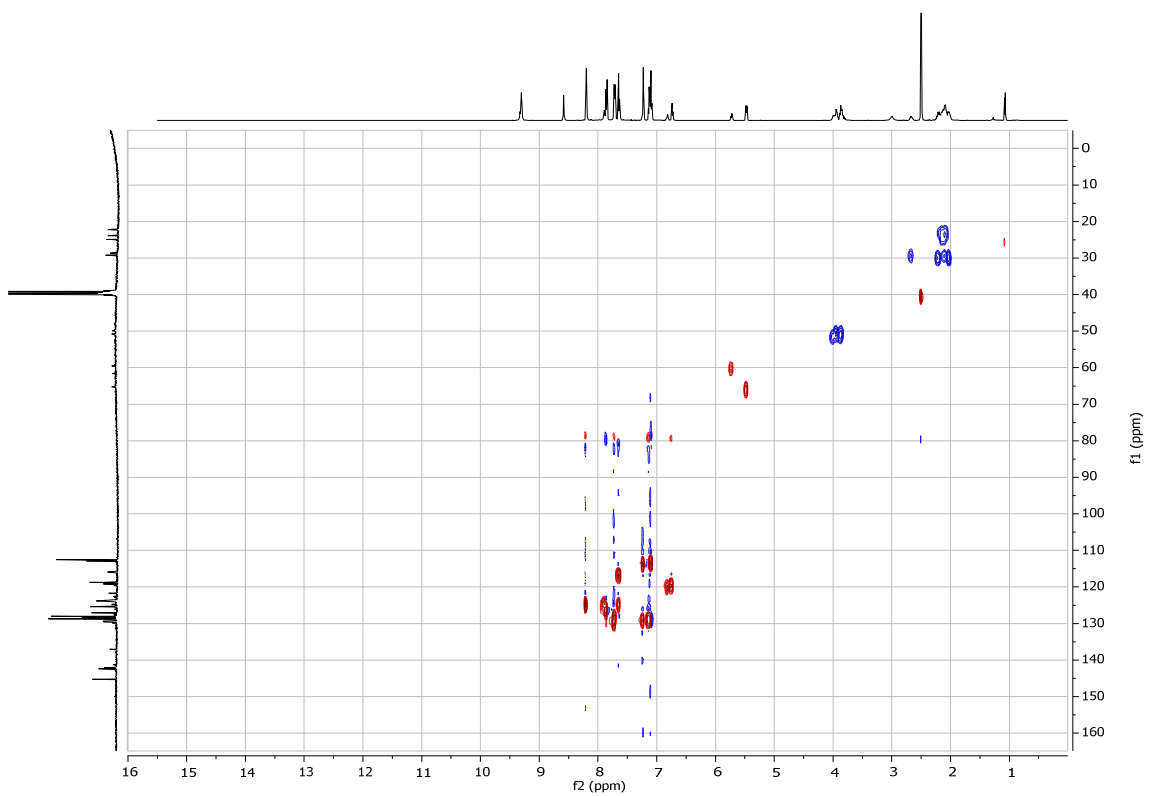

HSQC **4r**

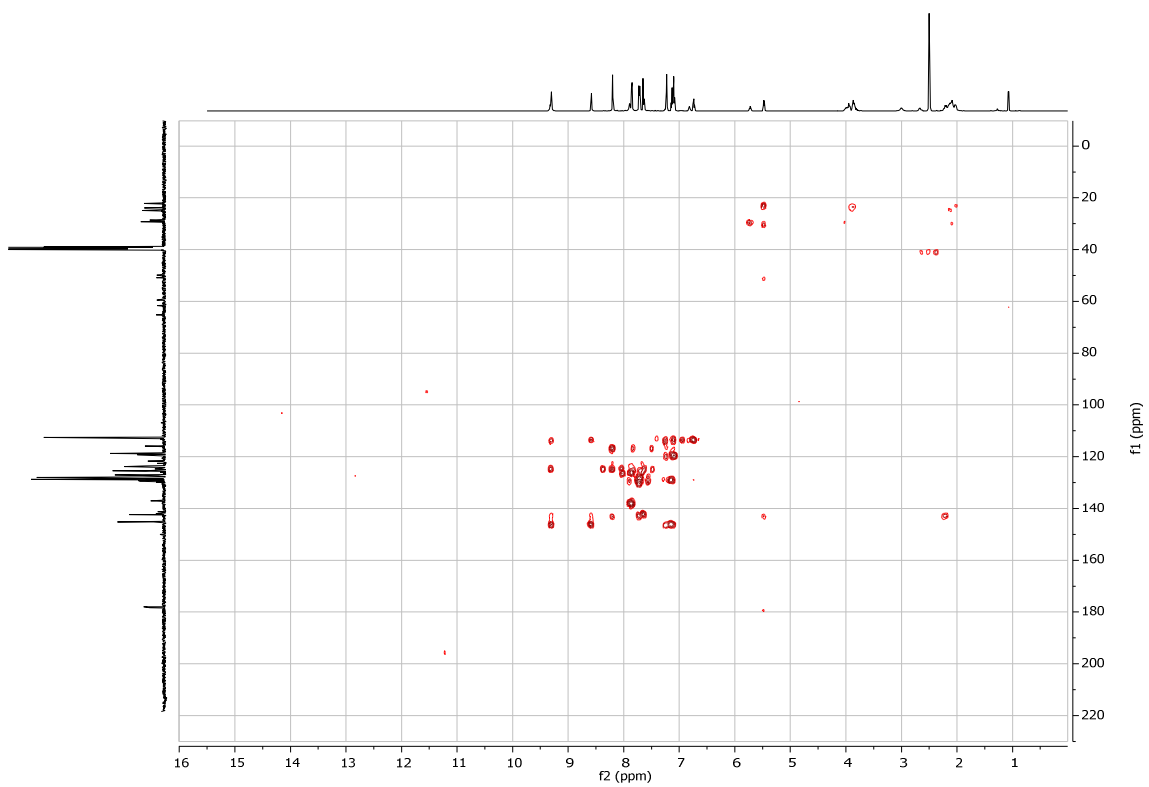

HMBC **4r**

**Figure SI-39.** NMR spectra for compound **4r** (DMSO-*d*<sub>6</sub>, 100°C)

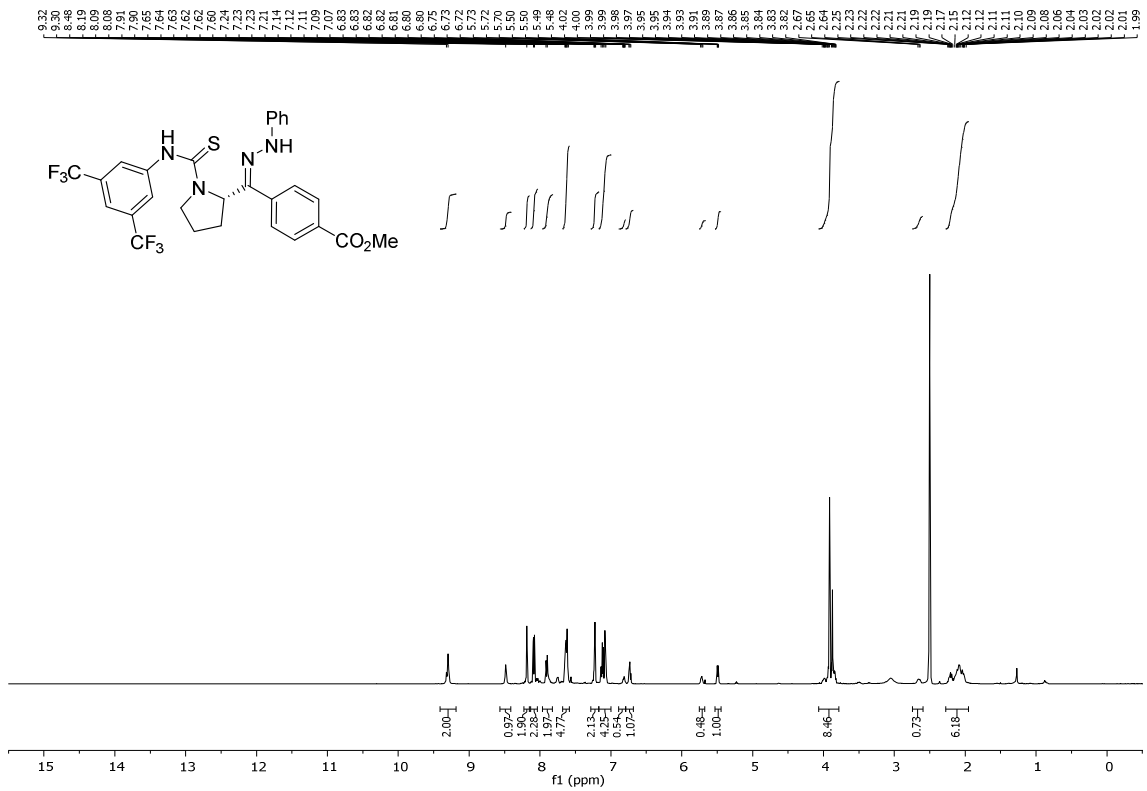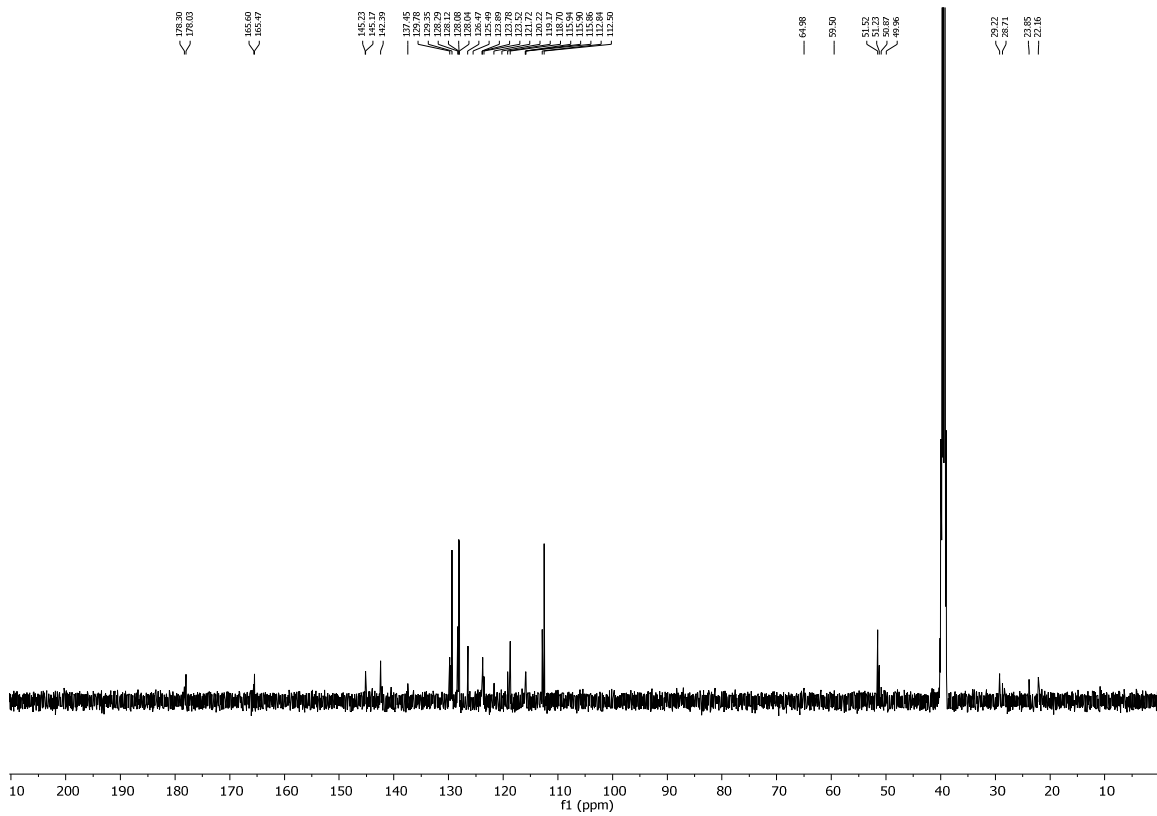



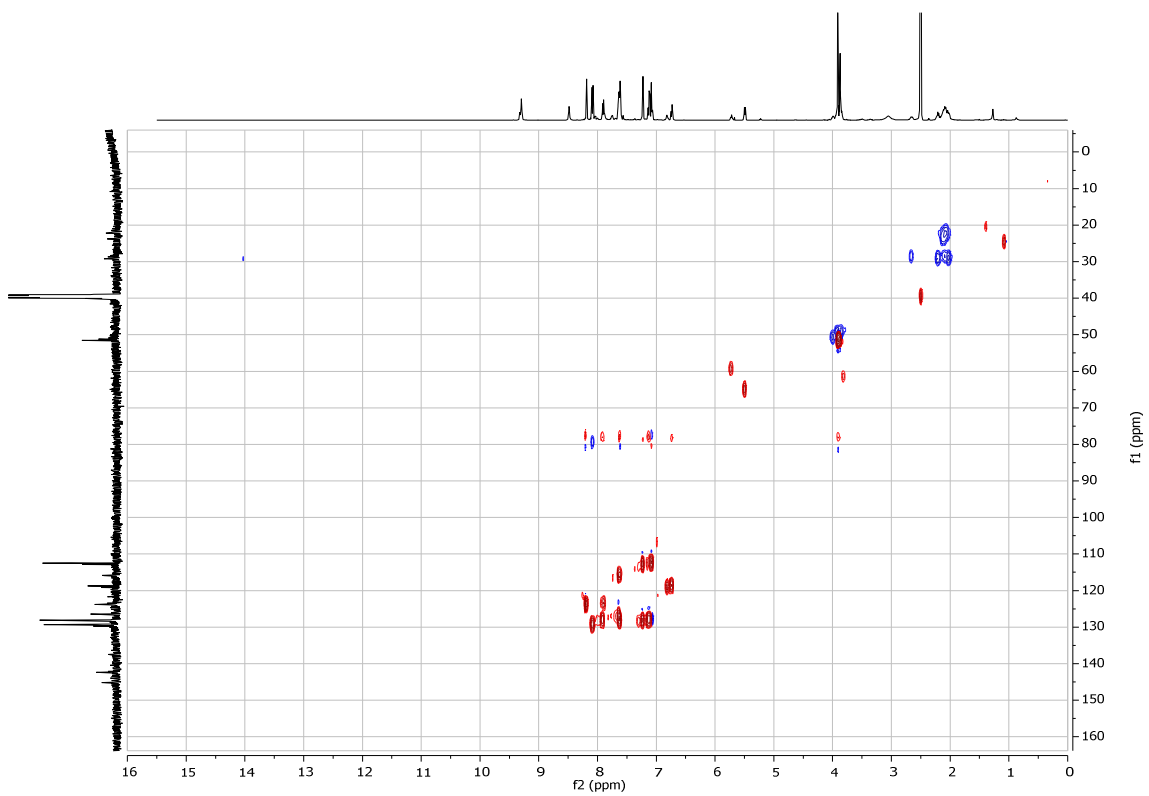

HSQC 4s

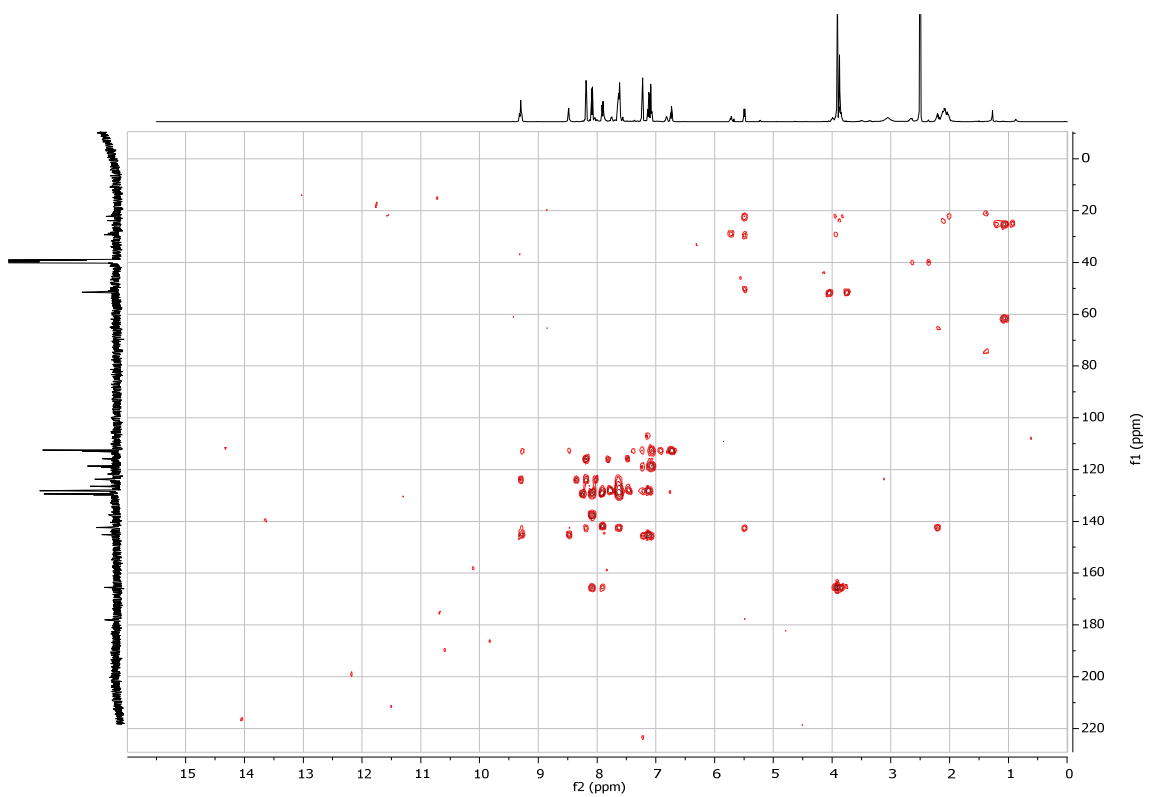

HMBC 4s

Figure SI-40. NMR spectra for compound 4s (DMSO-*d*<sub>6</sub>, 100°C)



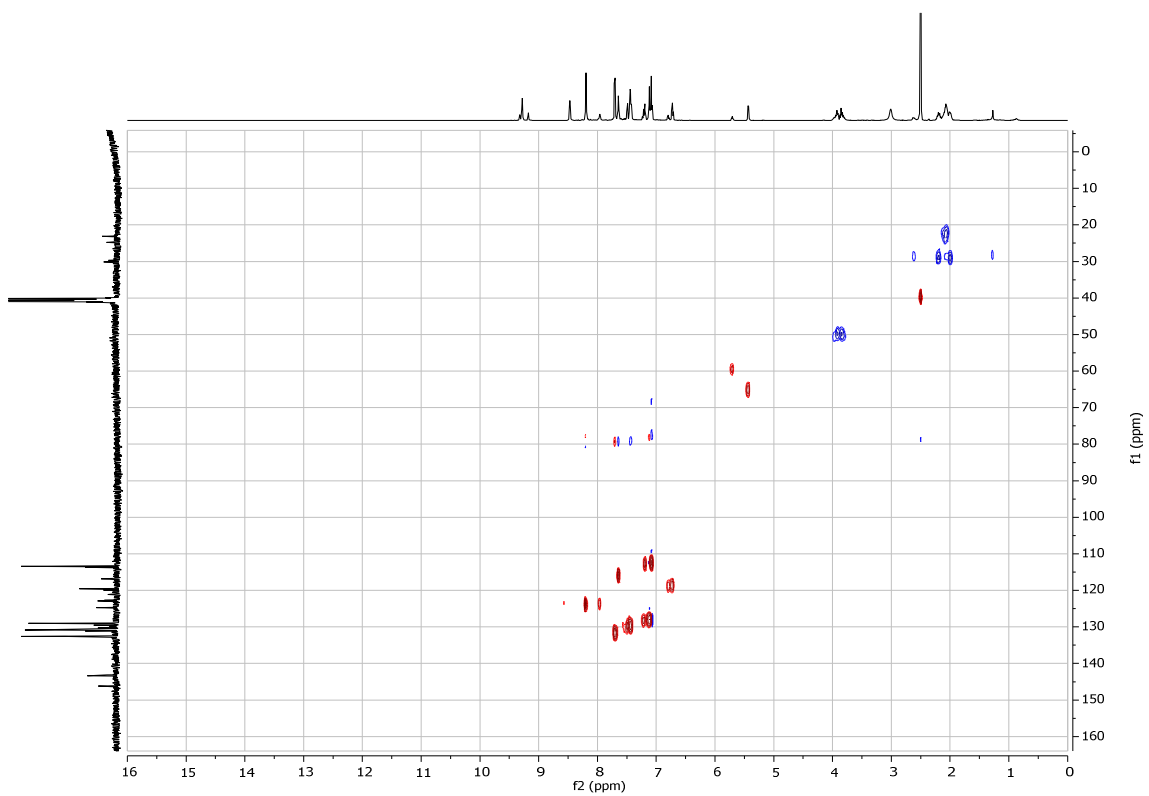

HSQC 4t

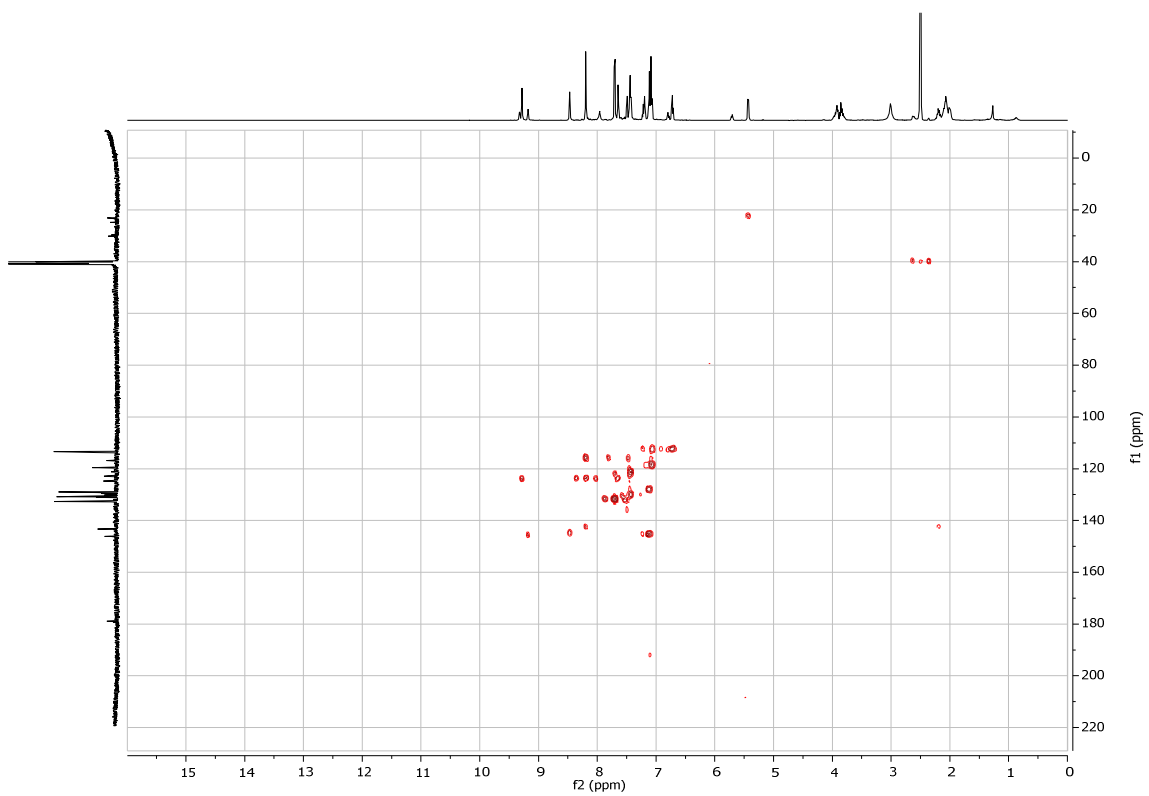

HMBC 4t

Figure SI-41. NMR spectra for compound **4t** (DMSO-*d*<sub>6</sub>, 100°C)

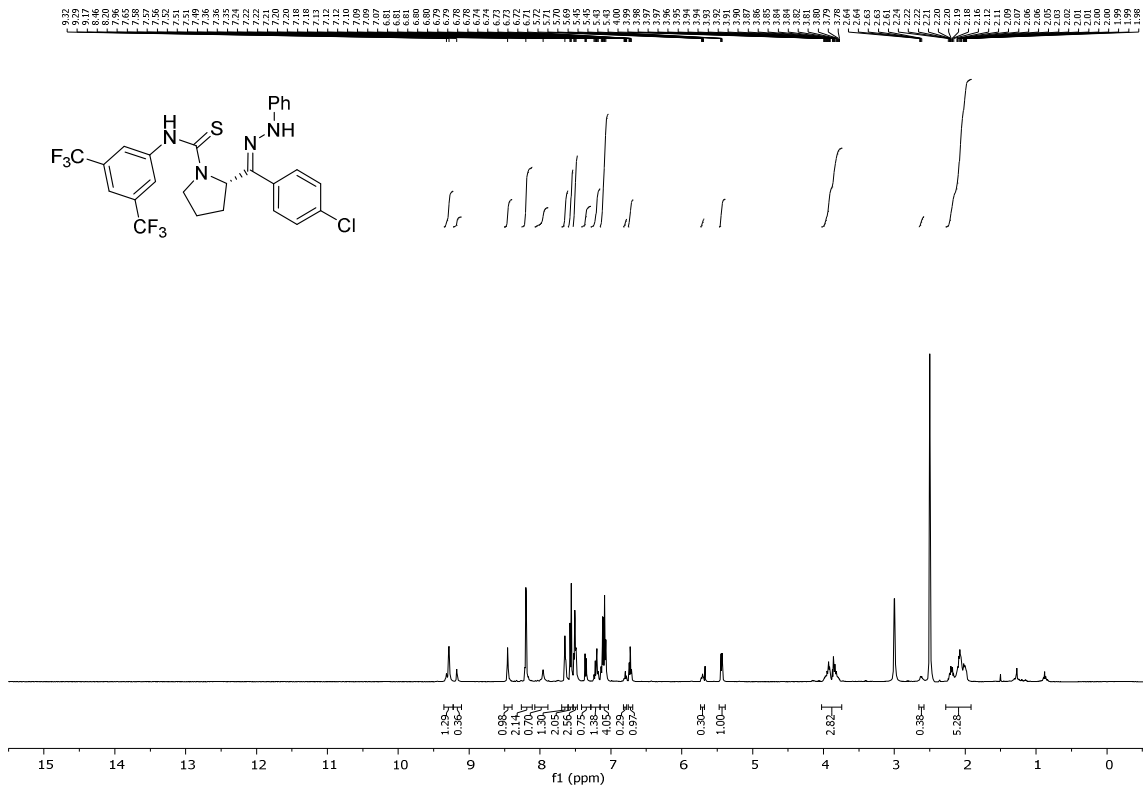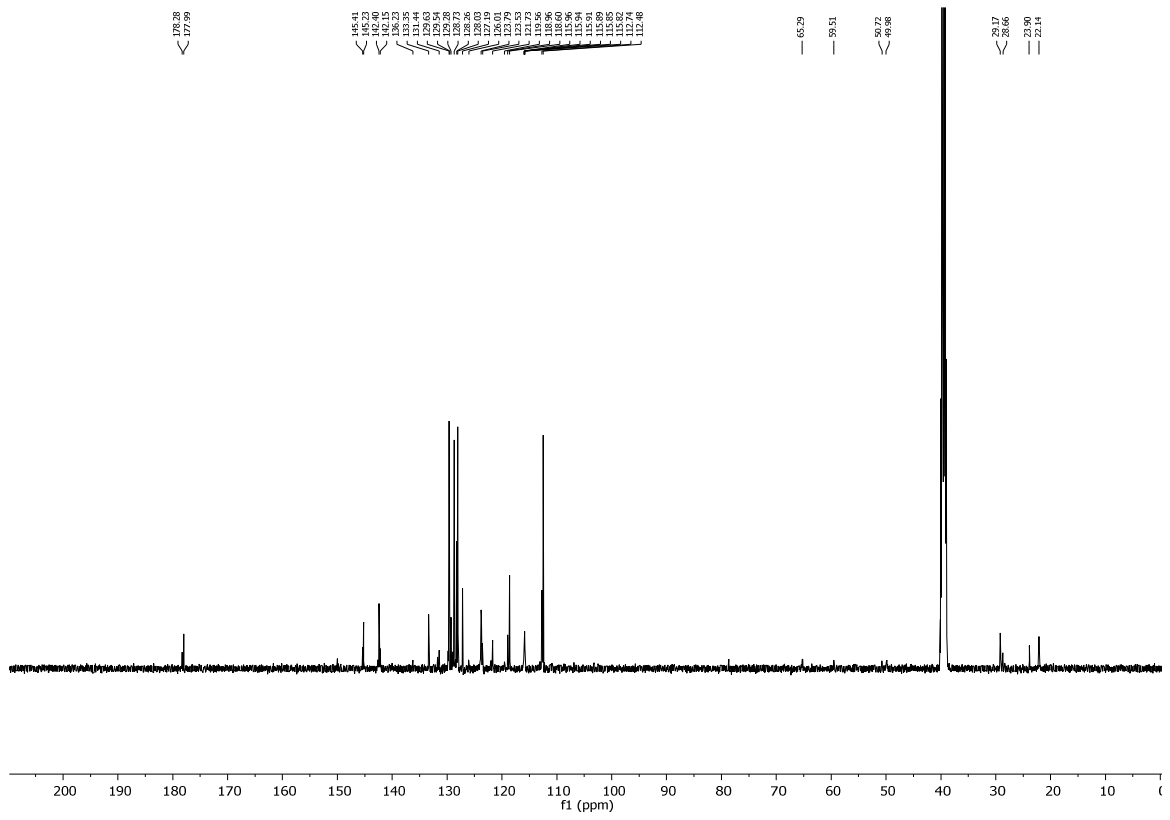

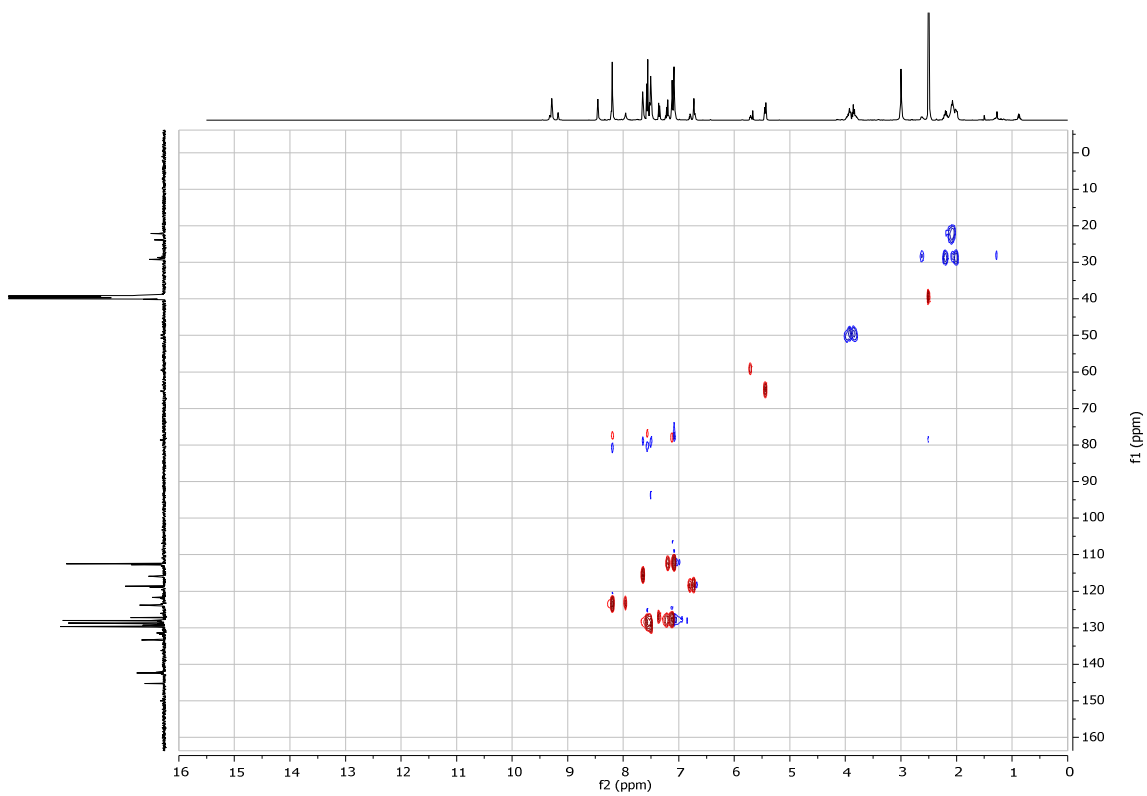

HSQC **4u**

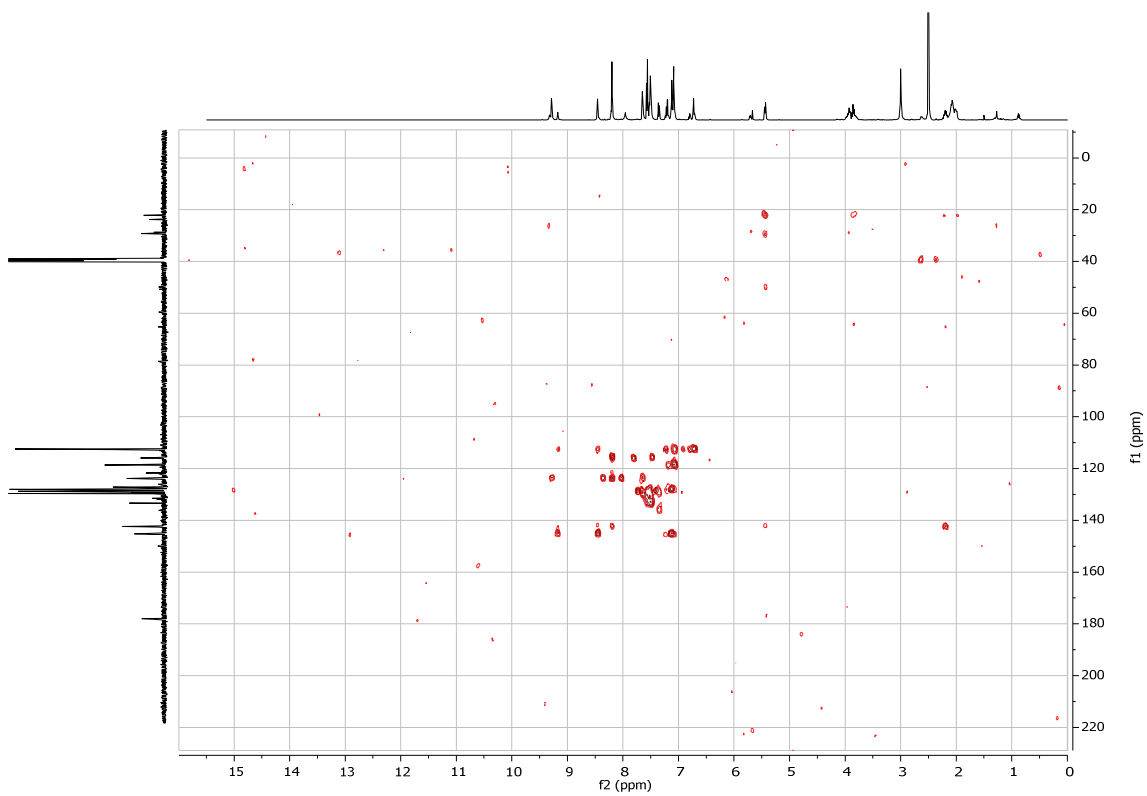

HMBC **4u**

**Figure SI-42.** NMR spectra for compound **4u** (DMSO-*d*<sub>6</sub>, 100°C)

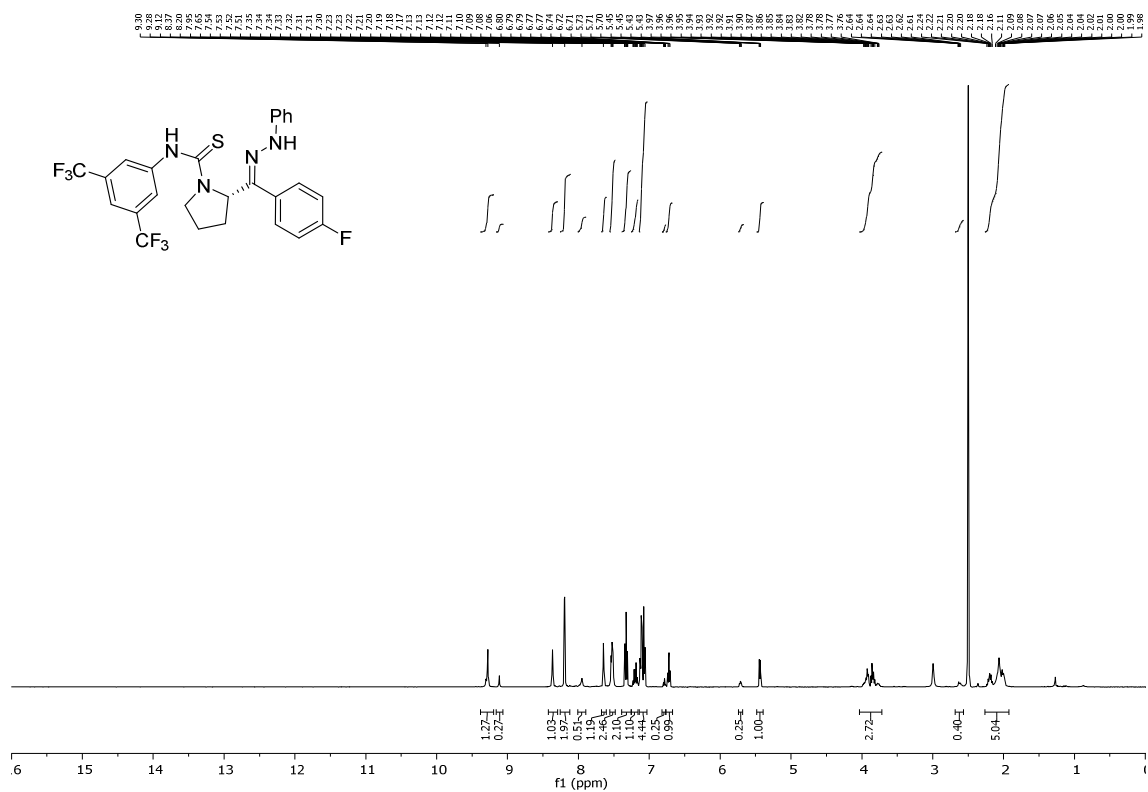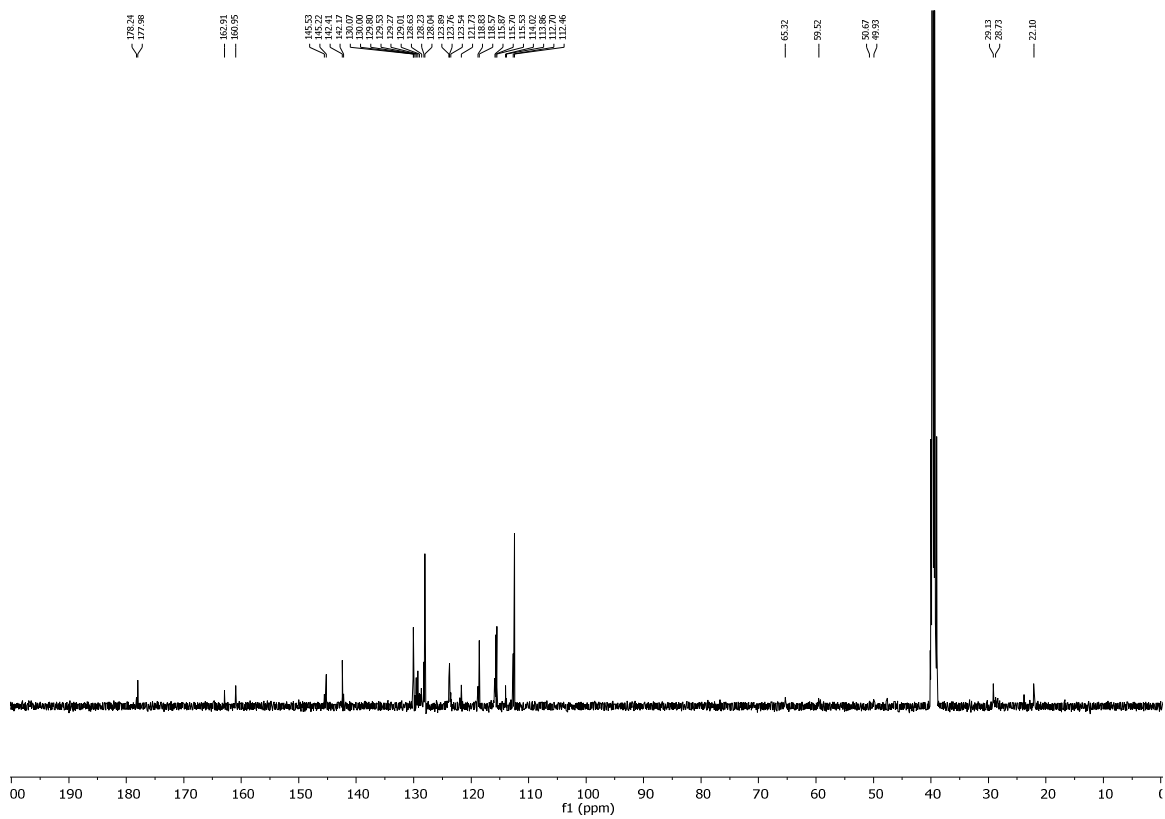

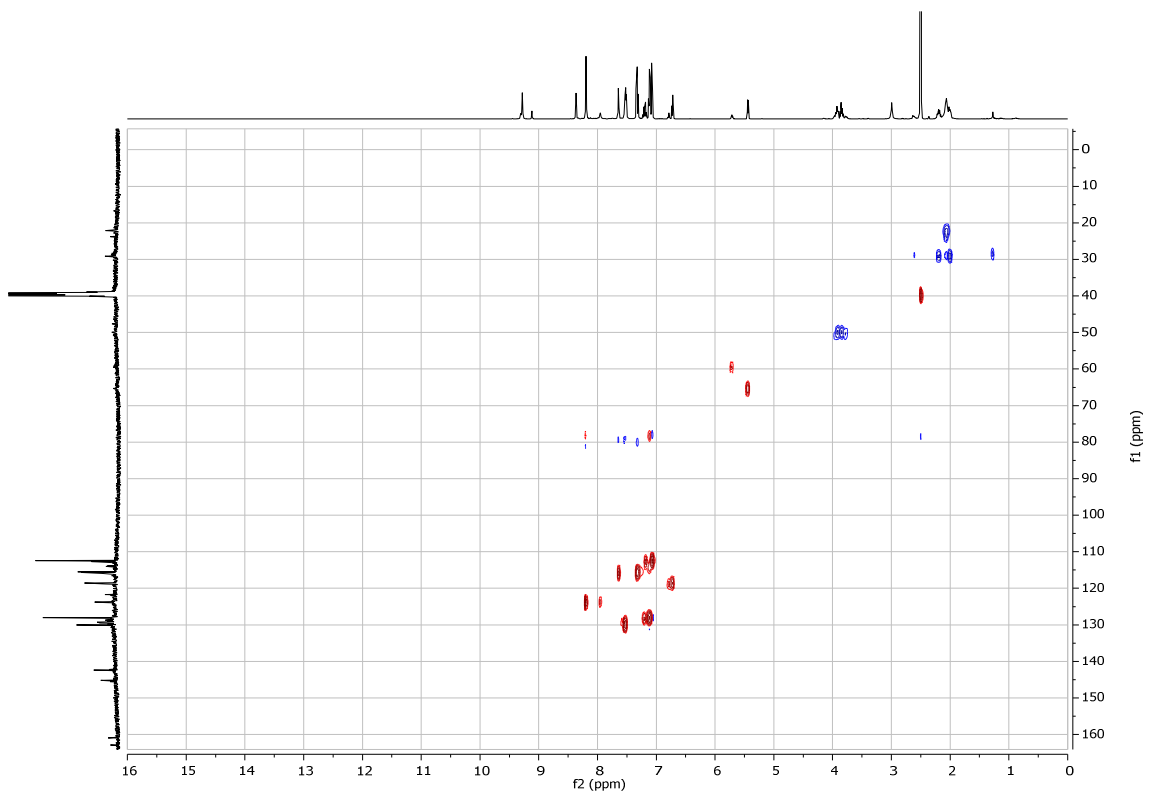

HSQC 4v

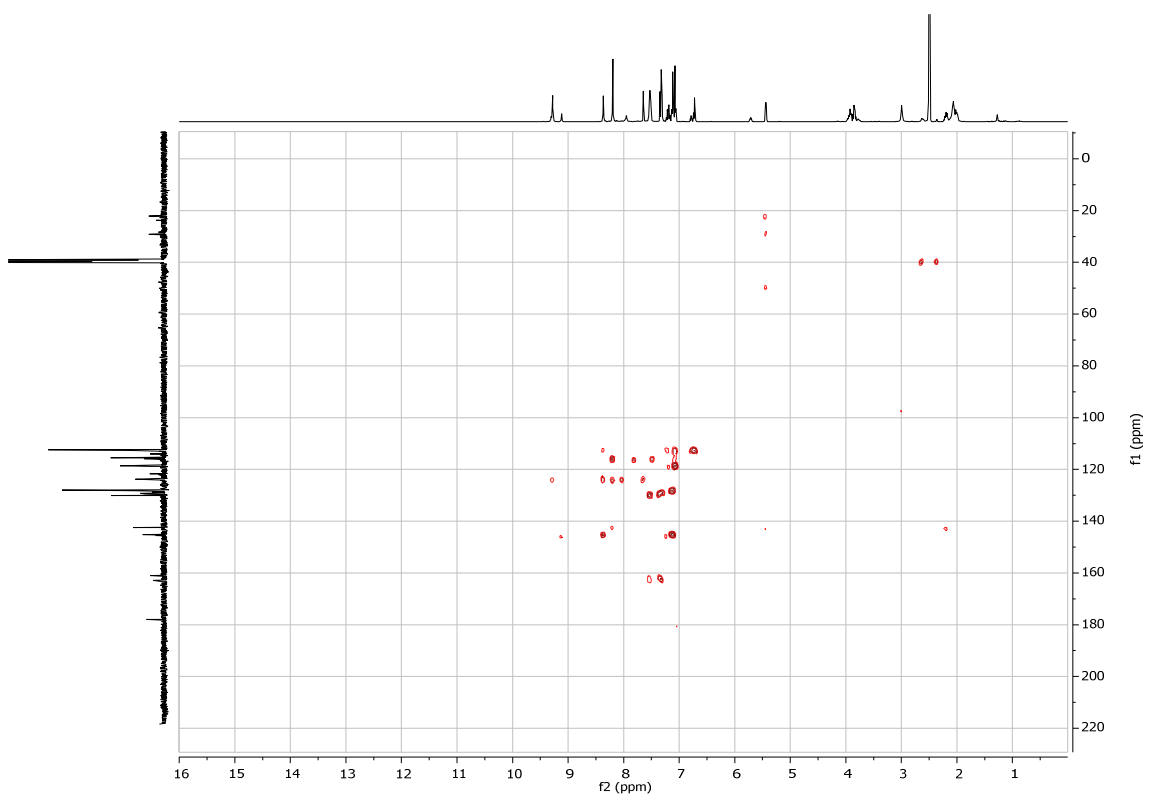

HMBC 4v

Figure SI-43. NMR spectra for compound 4v (DMSO-*d*<sub>6</sub>, 100°C)

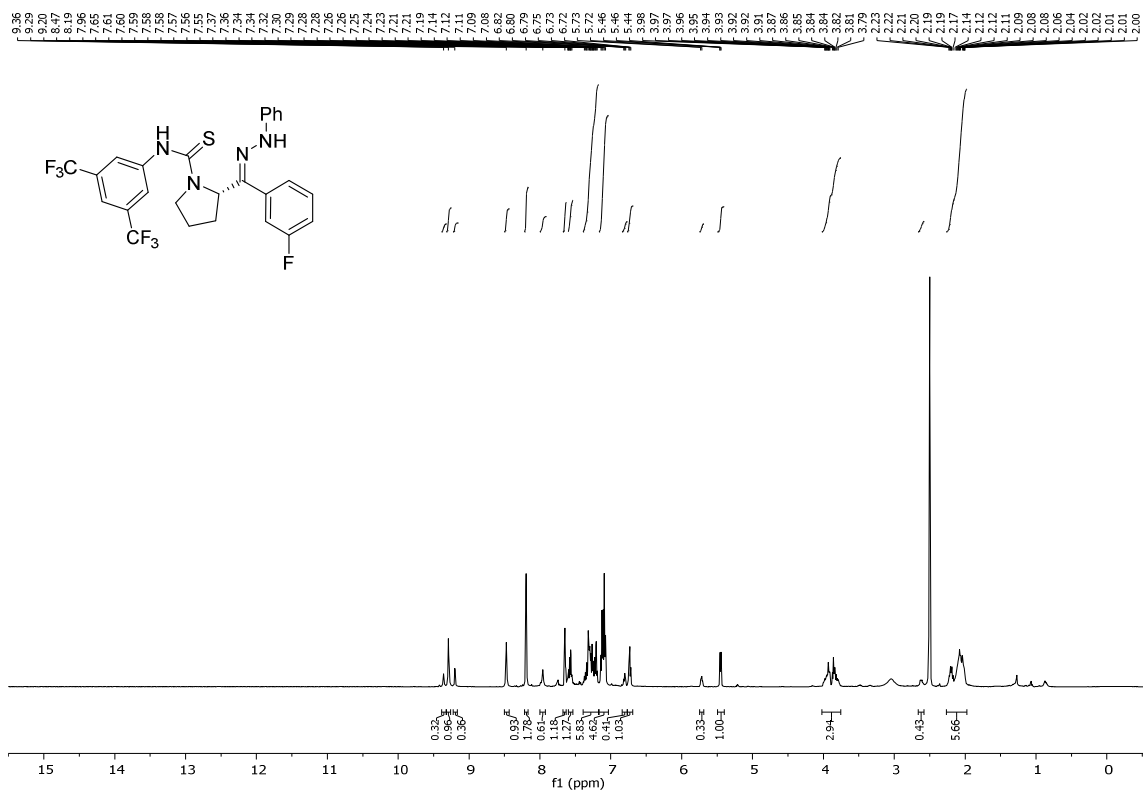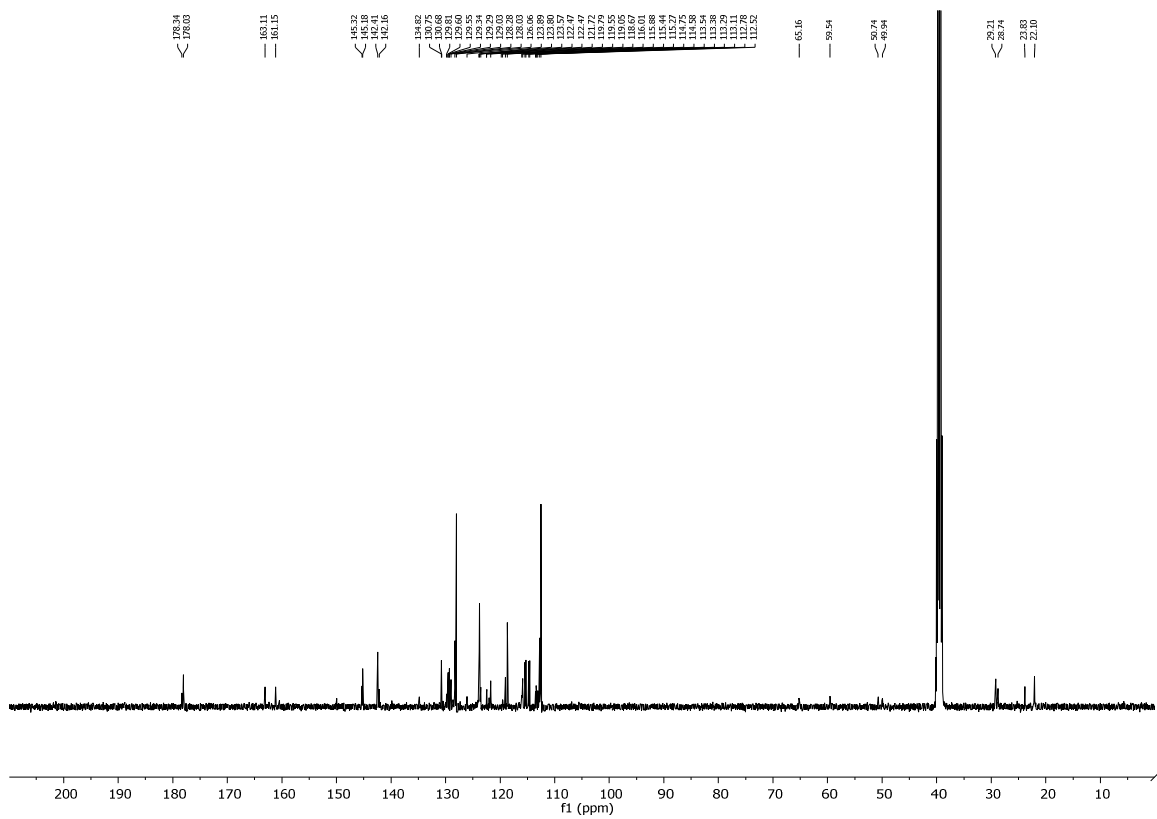



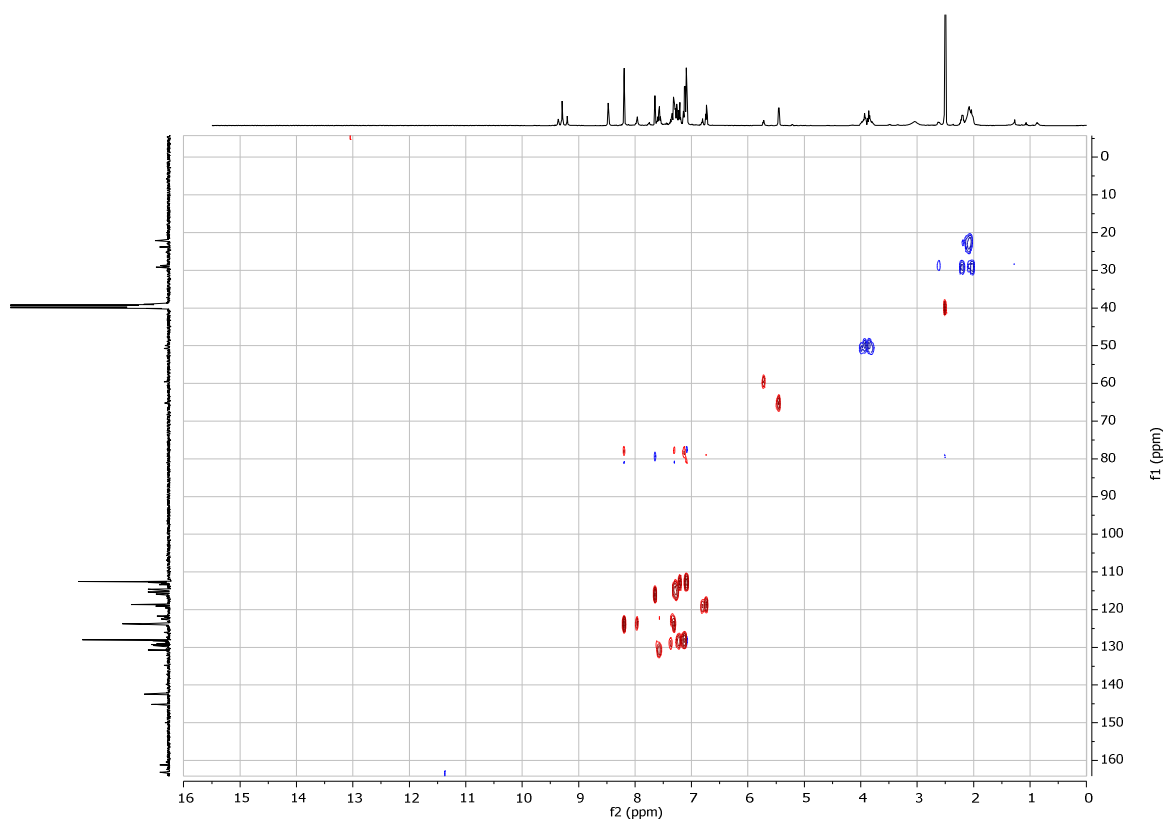

HSQC 4w

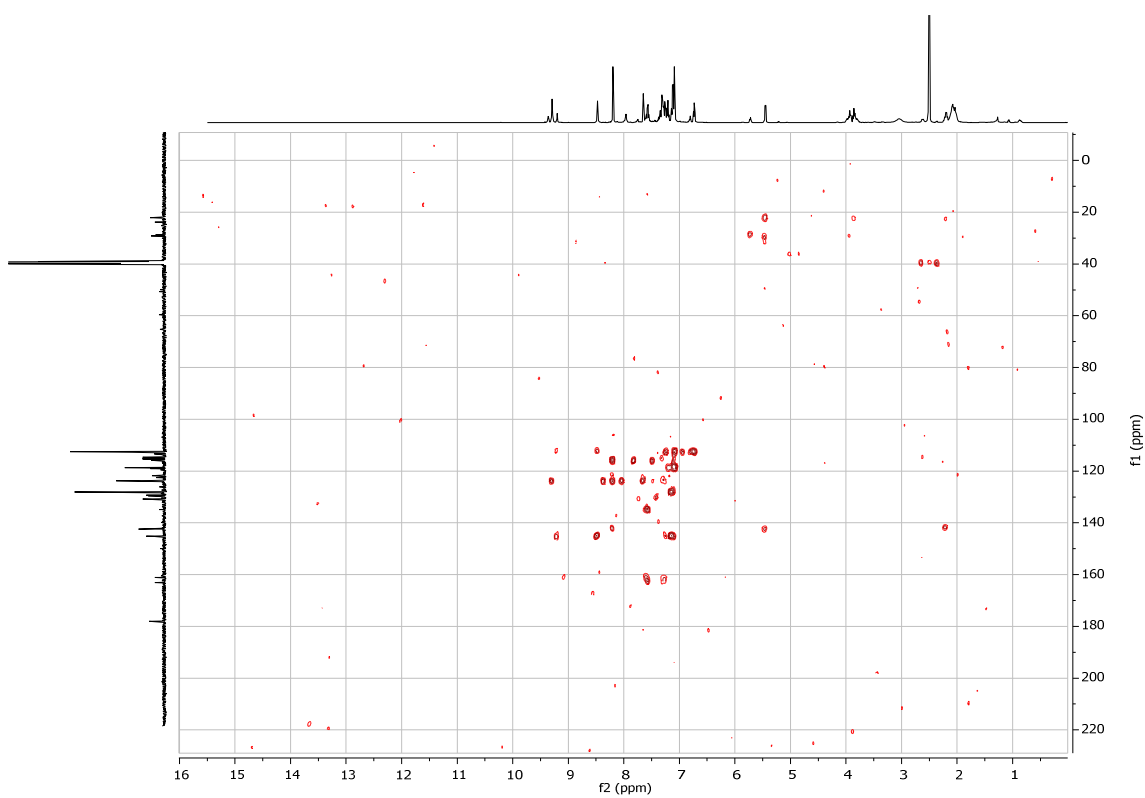

HSQC 4w

Figure SI-44. NMR spectra for compound **4w** (DMSO-*d*<sub>6</sub>, 100°C)

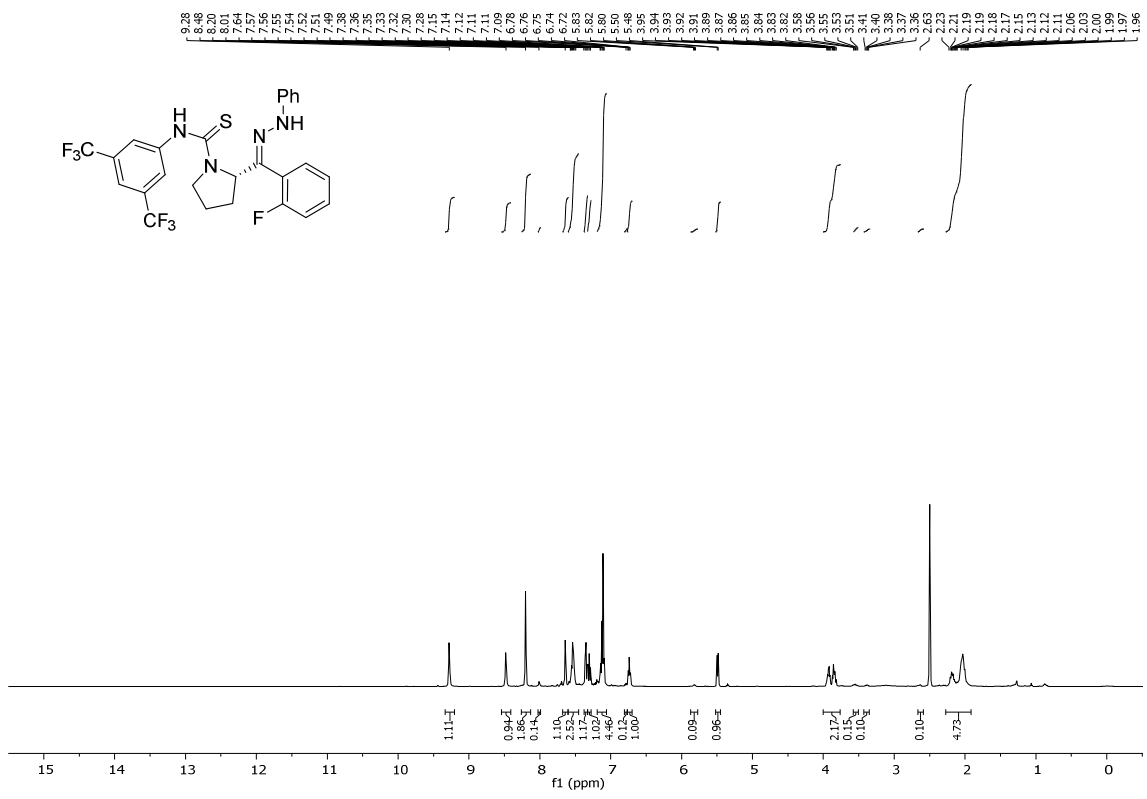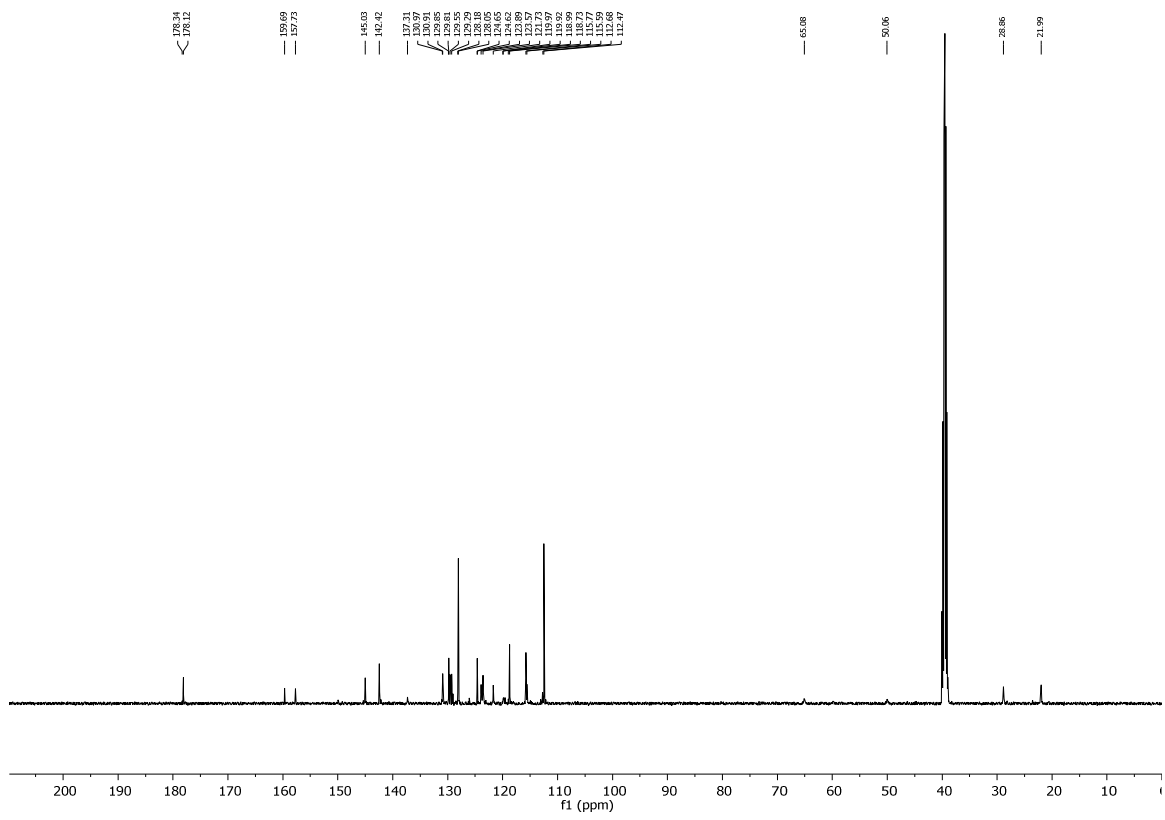

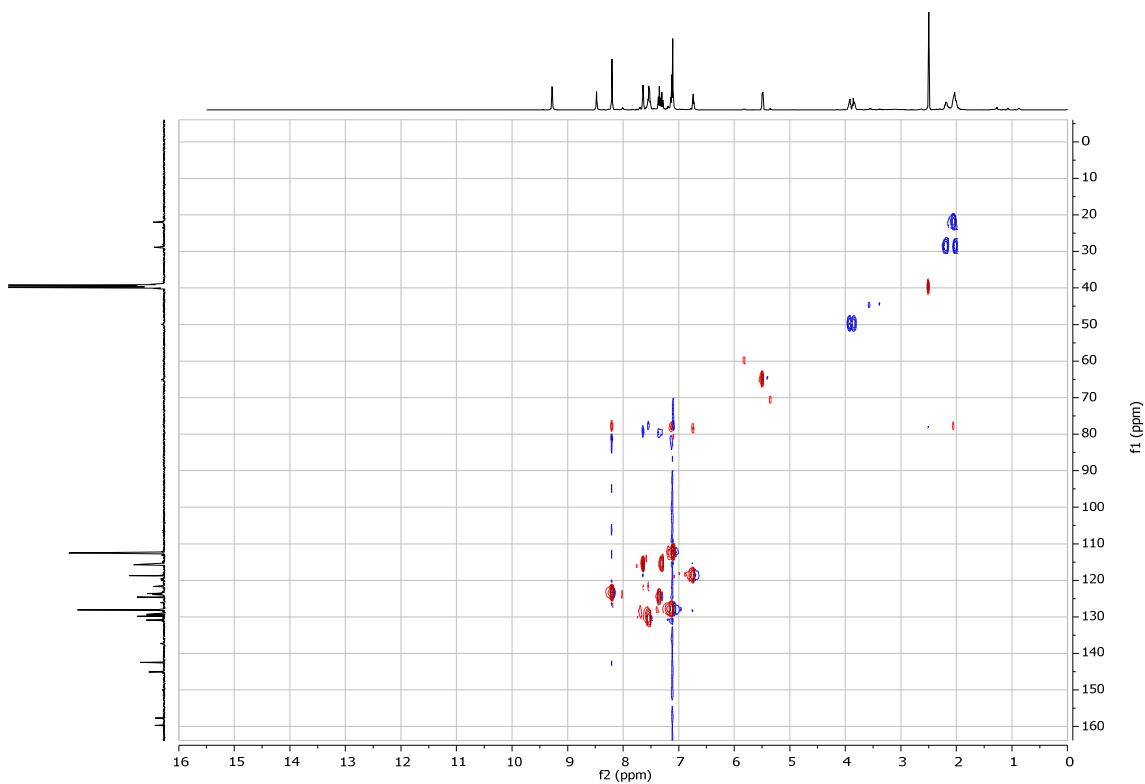

HSQC 4x

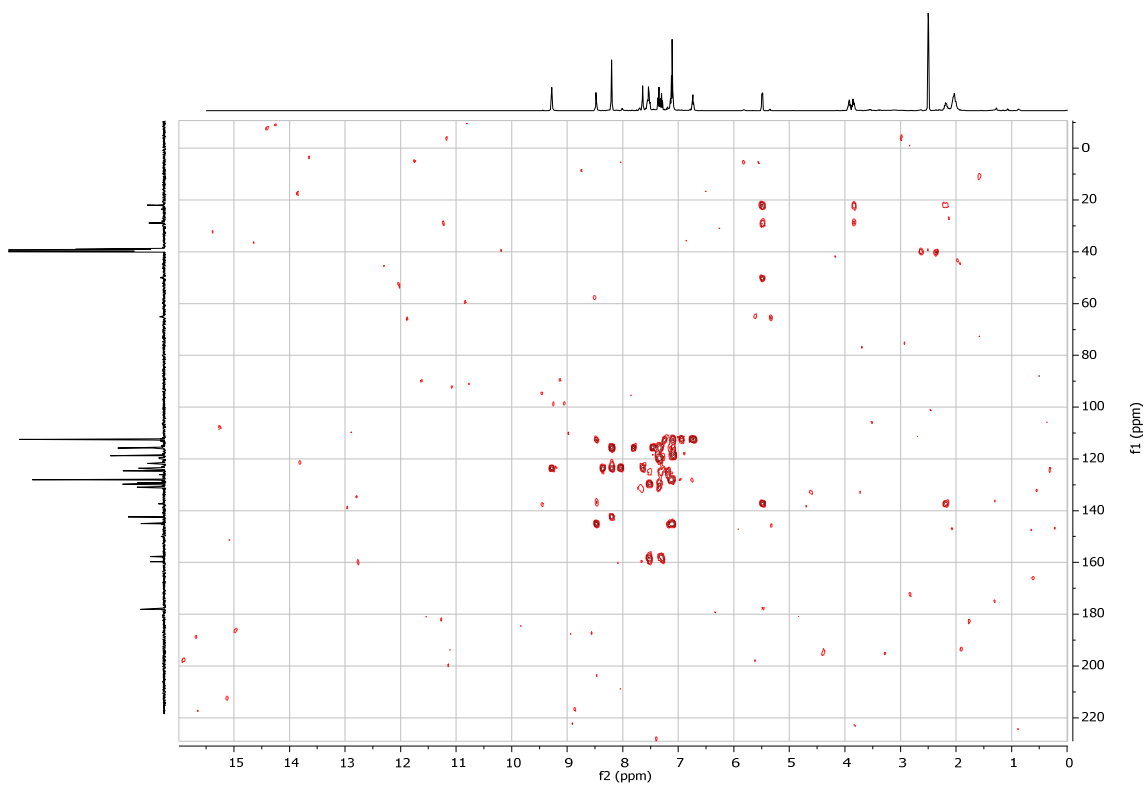

HMBC 4x

Figure SI-45. NMR spectra for compound **4x** (DMSO-*d*<sub>6</sub>, 100°C)



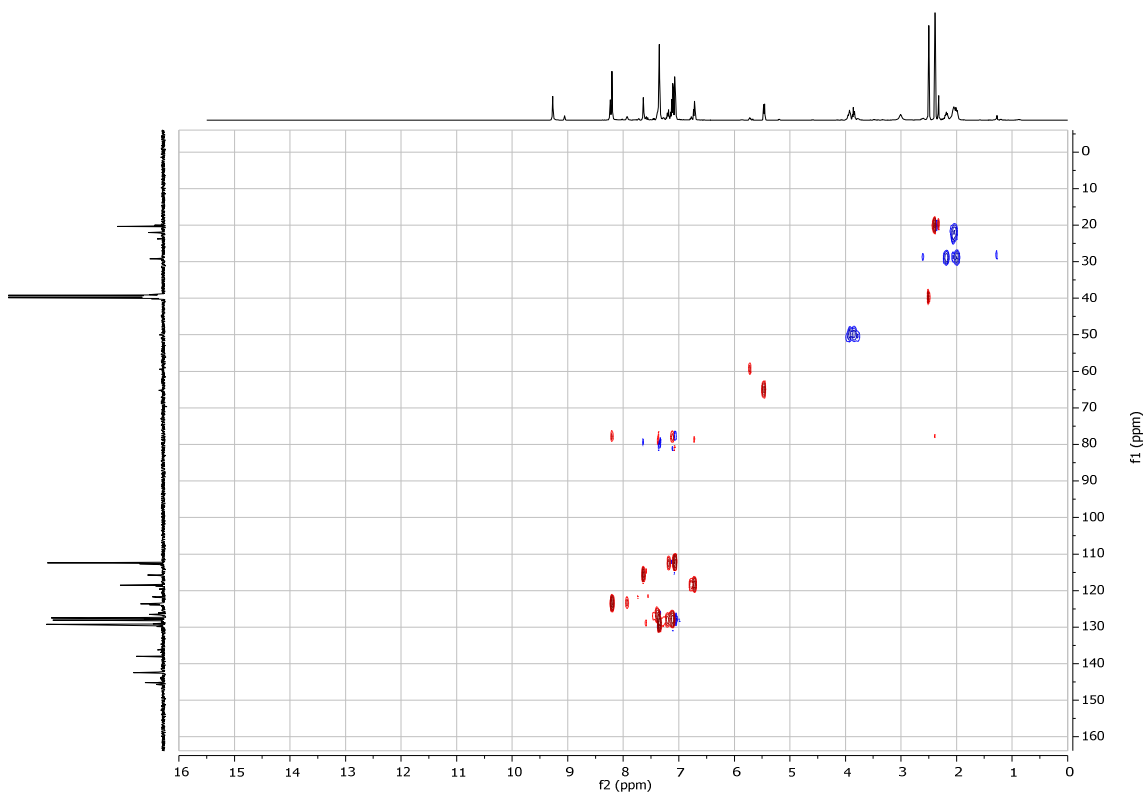

HSQC 4y

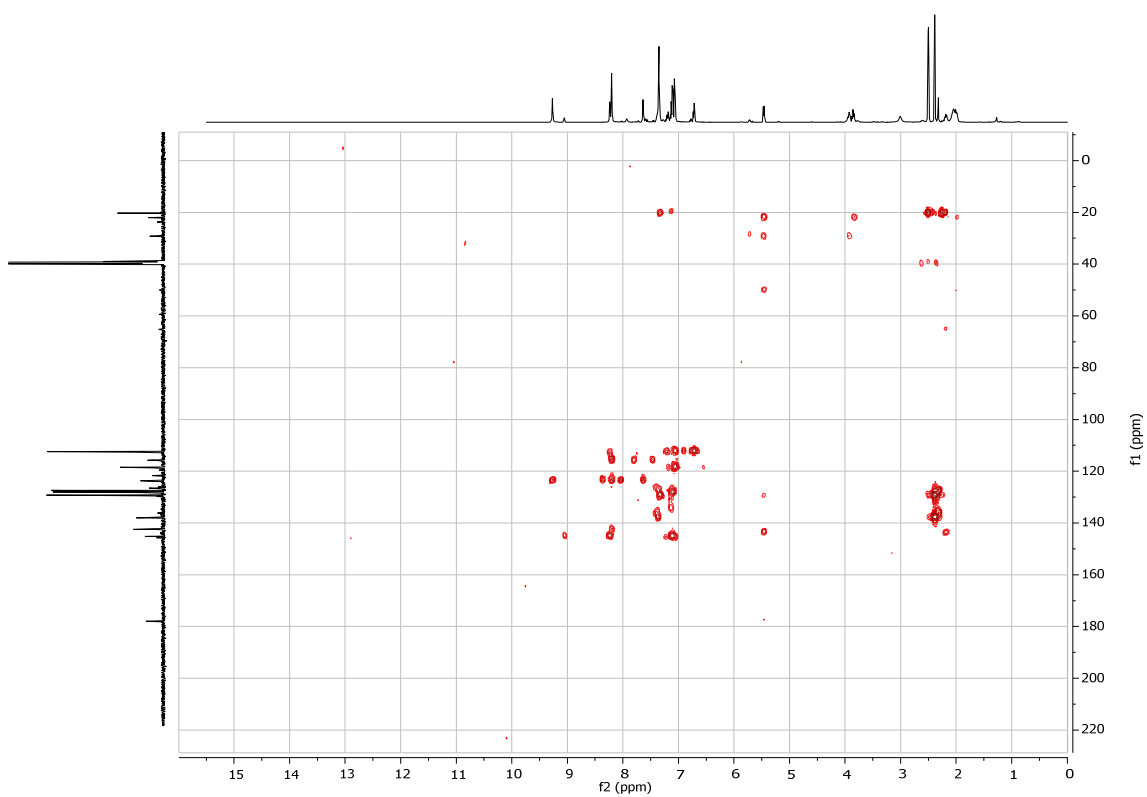

HMBC 4y

Figure SI-46. NMR spectra for compound **4y** (DMSO-*d*<sub>6</sub>, 100°C)

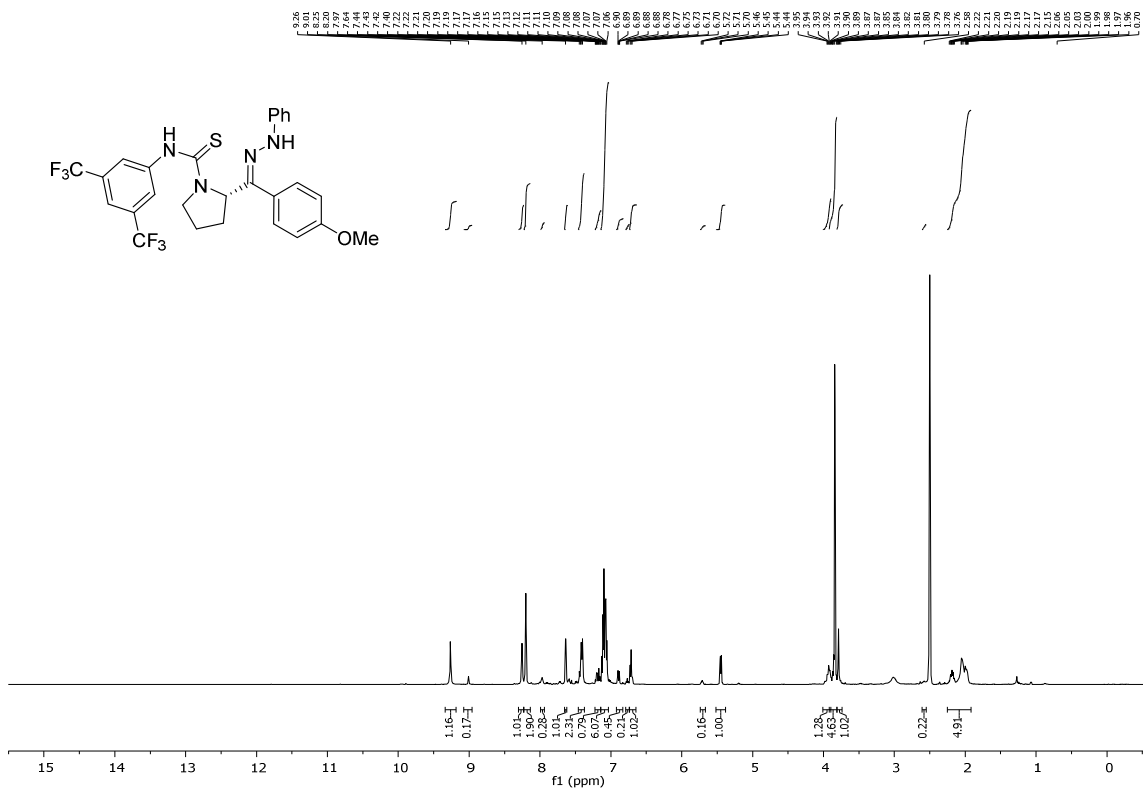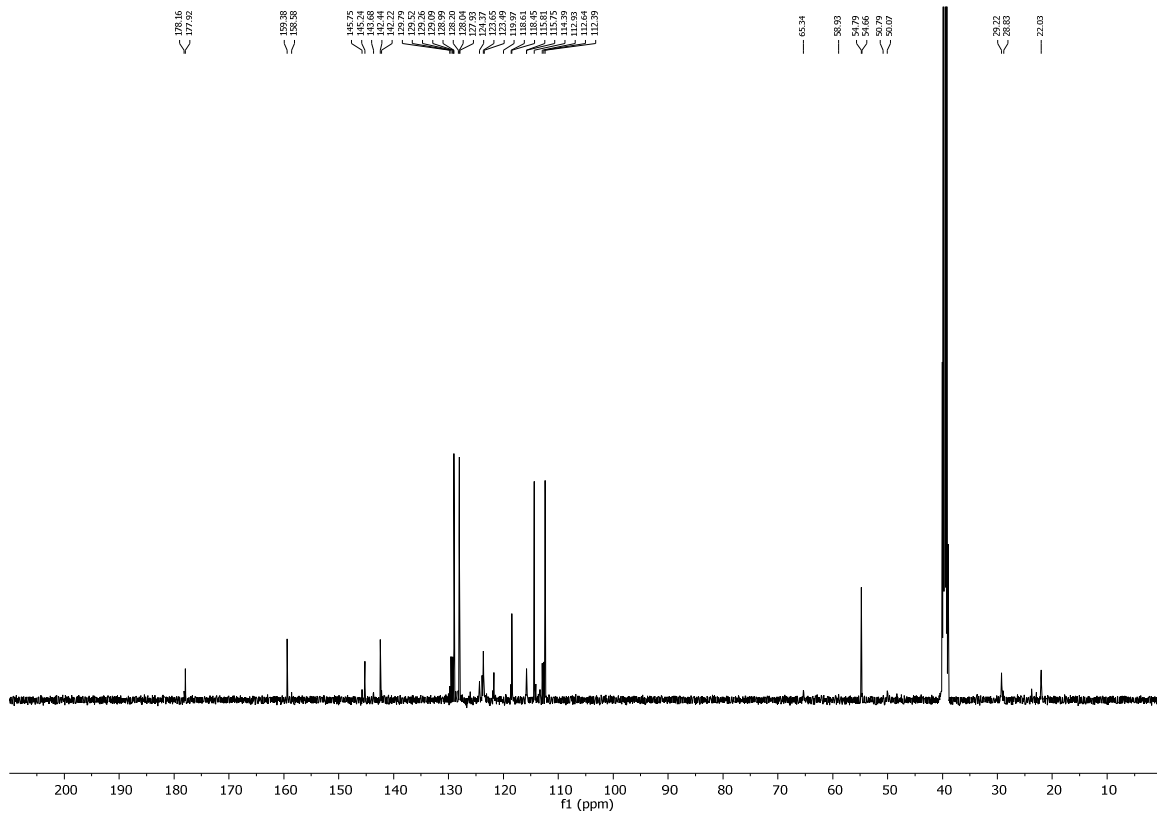

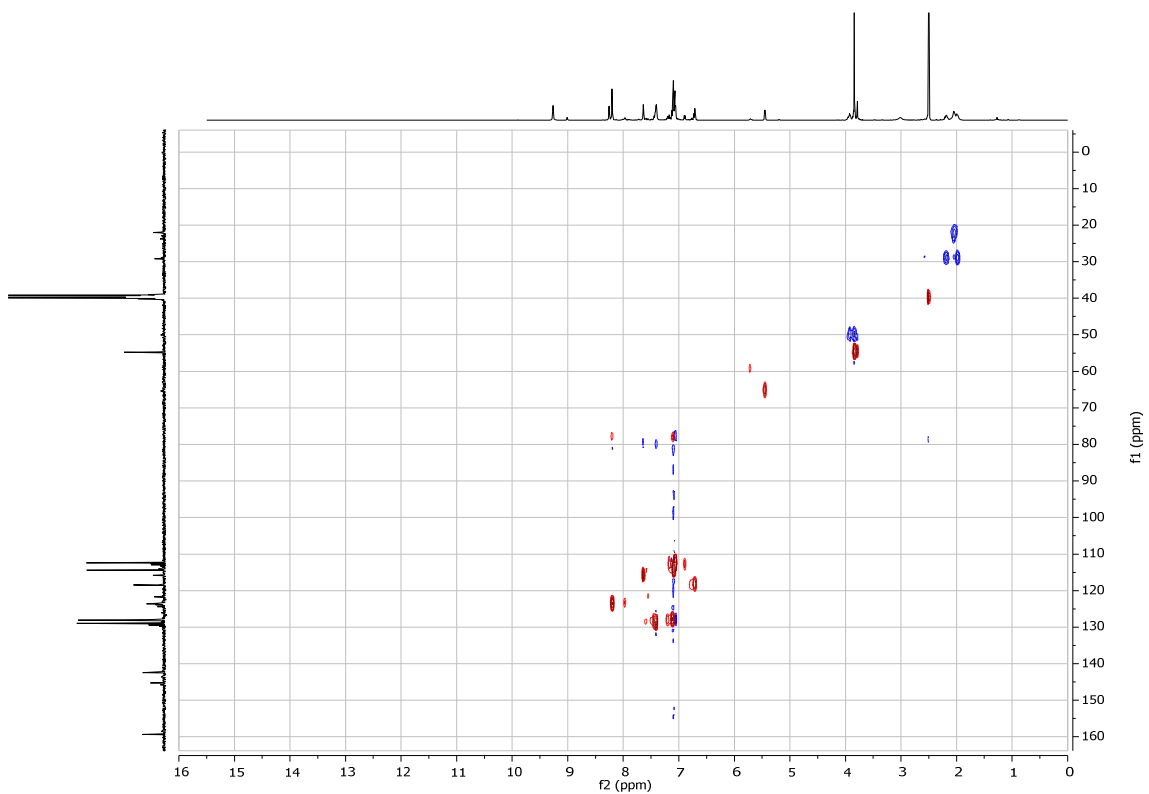

HSQC **4z**

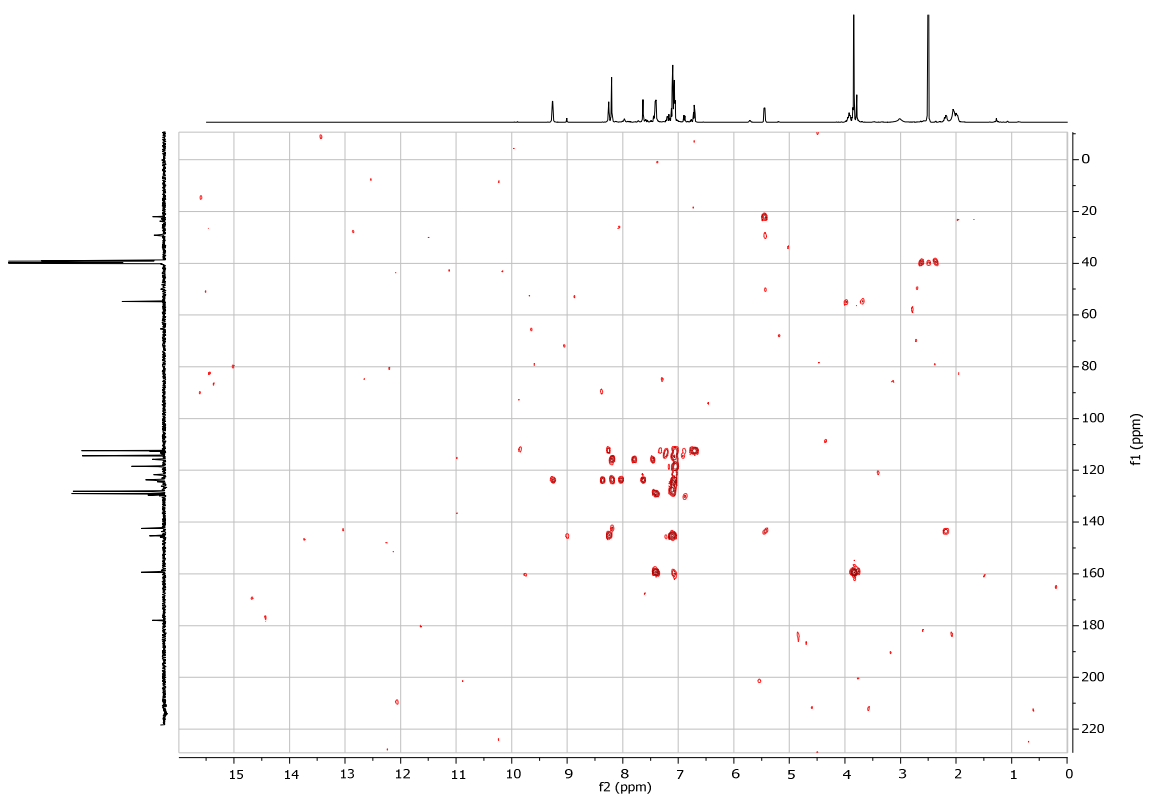

HMBC **4z**

Figure SI-47. NMR spectra for compound **4z** (DMSO-*d*<sub>6</sub>, 100°C)





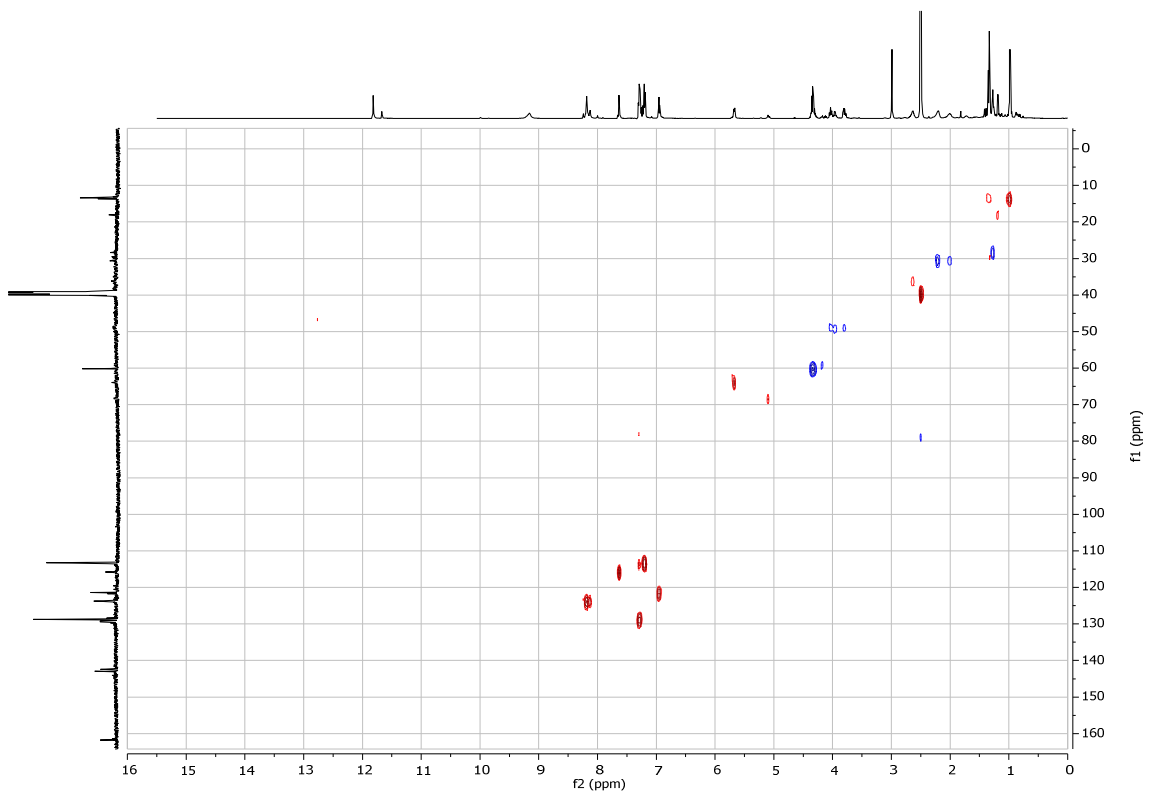

HSQC 6a

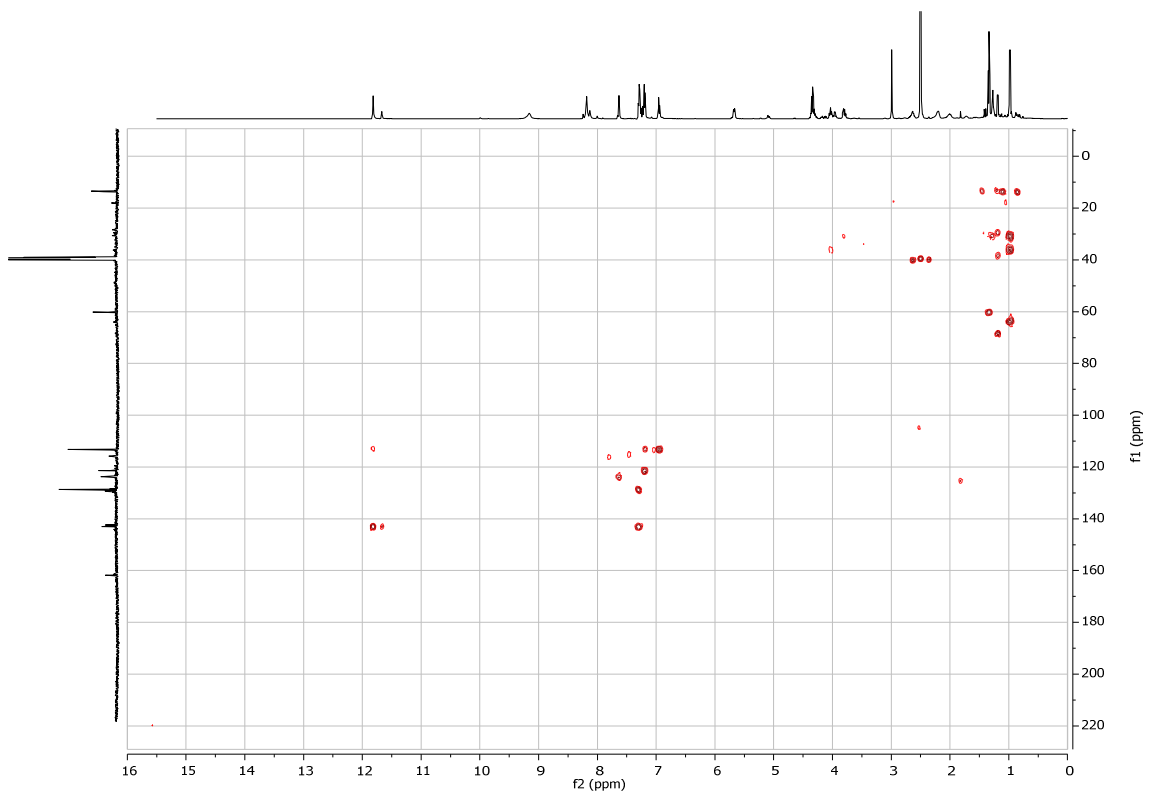

HMBC 6a

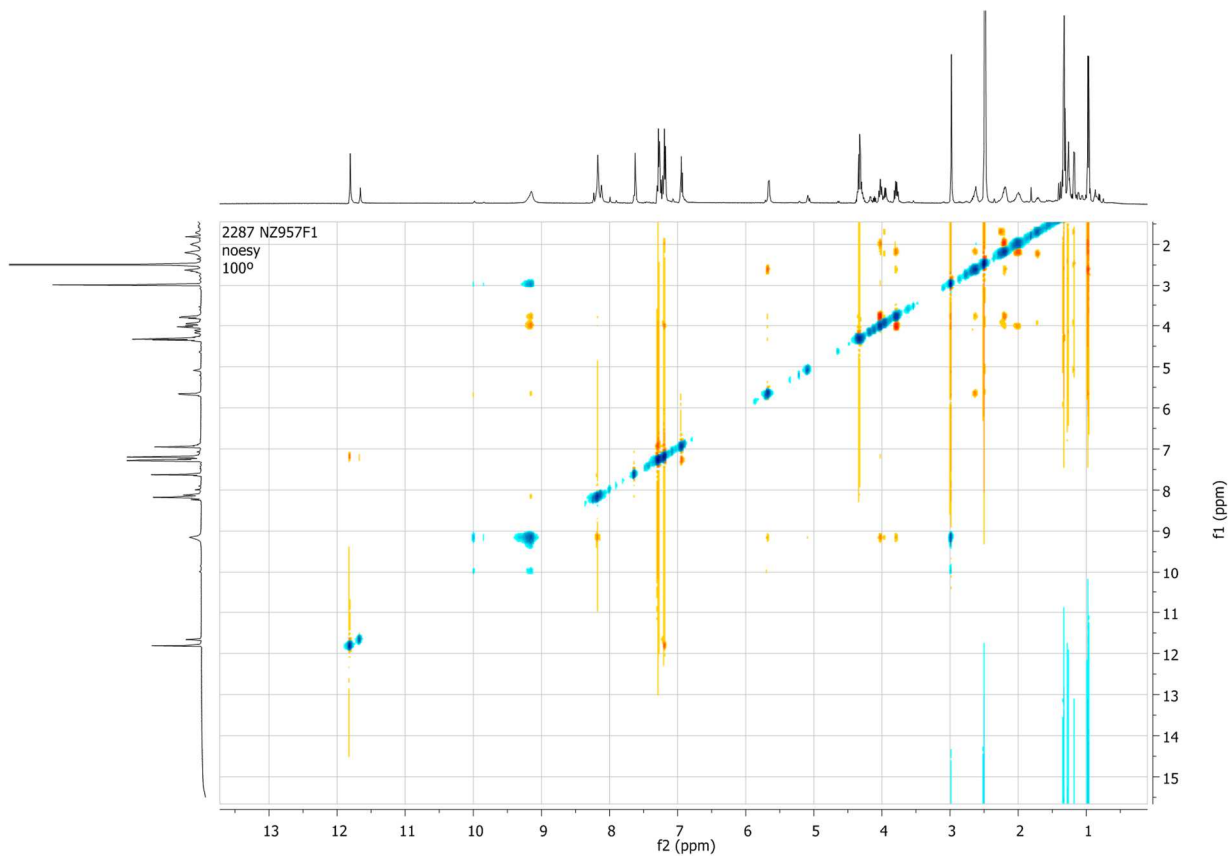

NOESY **6a**

**Figure SI-48.** NMR spectra for compound **6a** (DMSO-*d*<sub>6</sub>, 100°C)



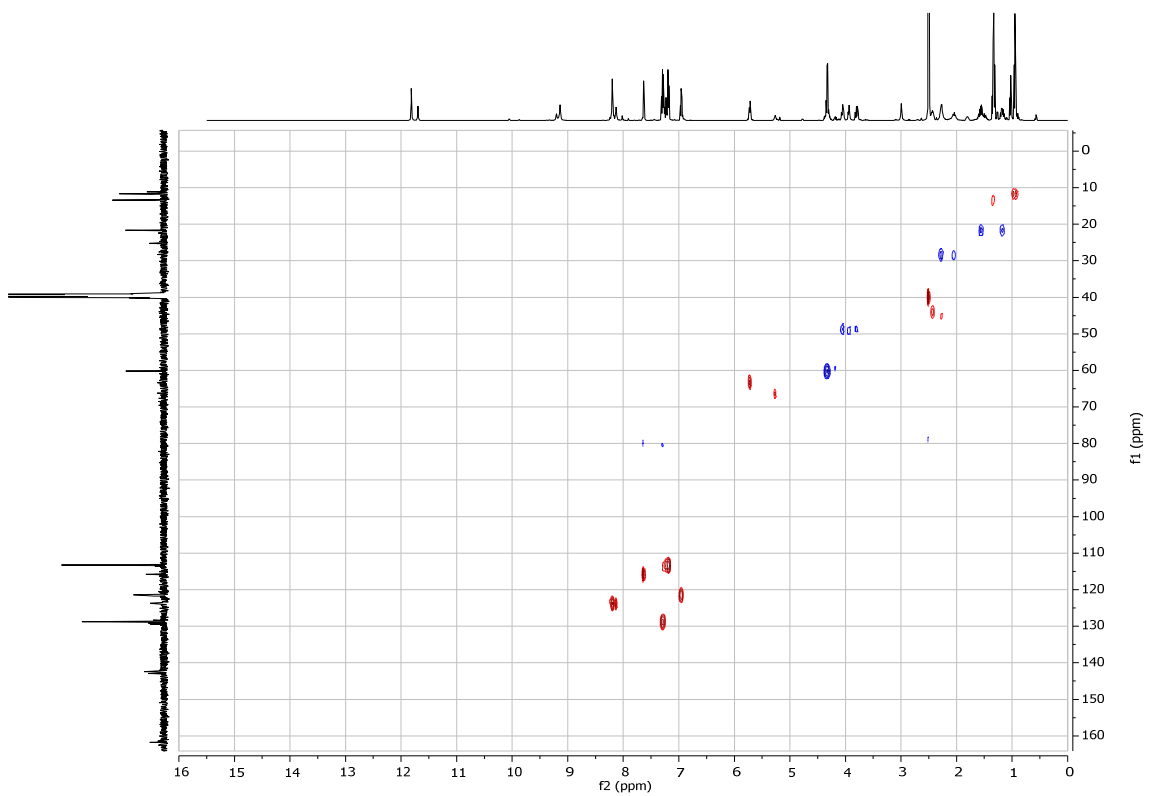

HSQC **6b**

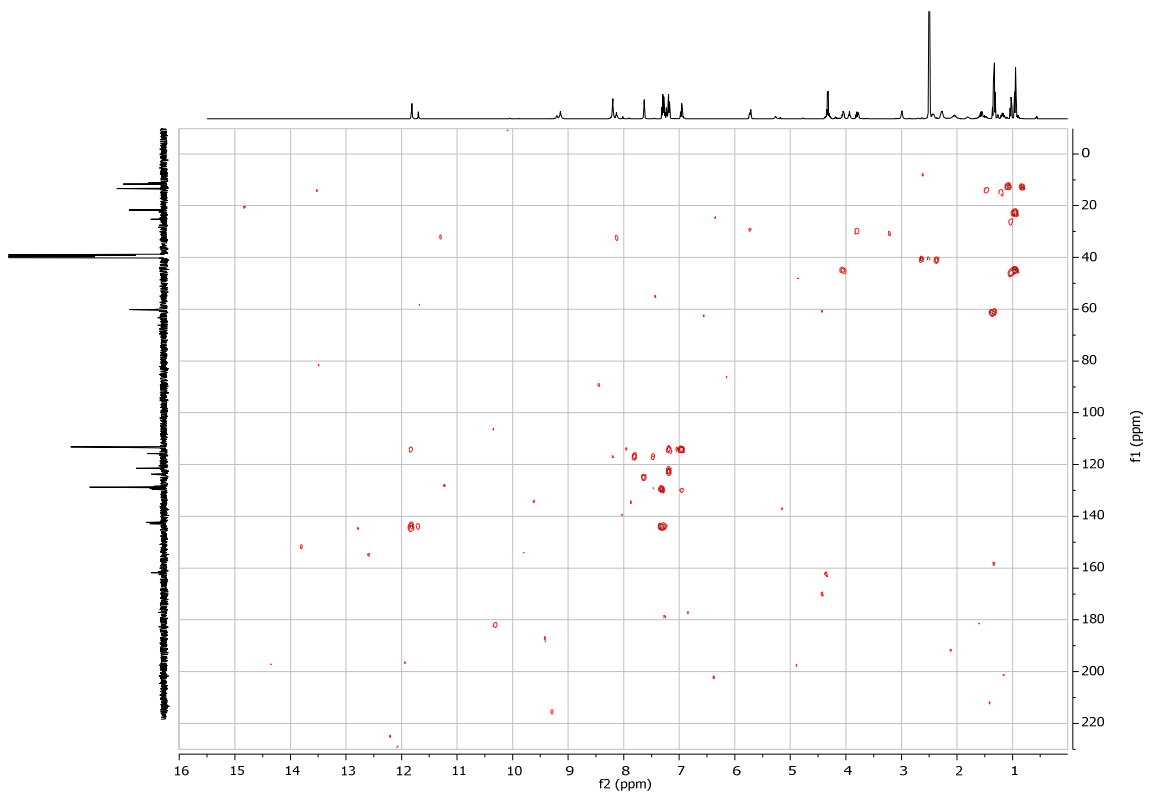

HMBC **6b**

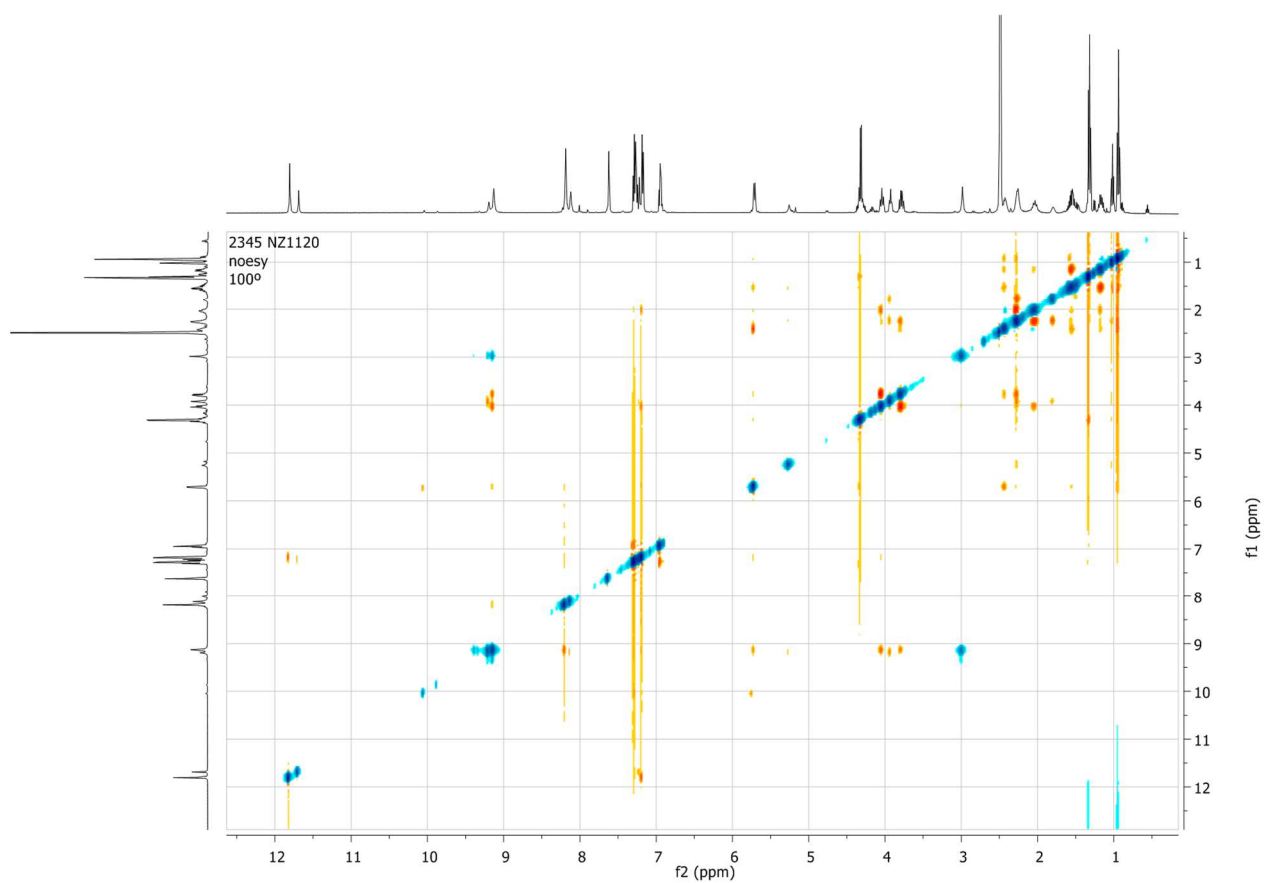

NOESY **6b**

Figure SI-49. NMR spectra for compound **6b** (DMSO- $d_6$ , 100°C)

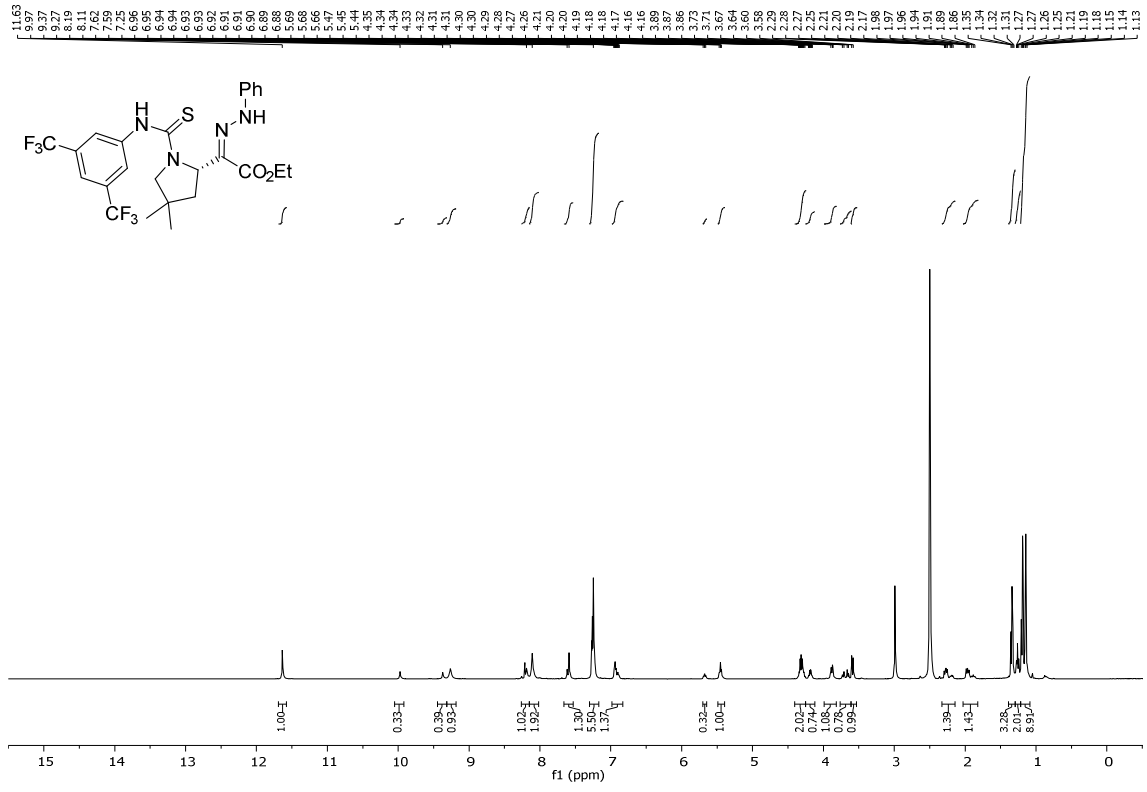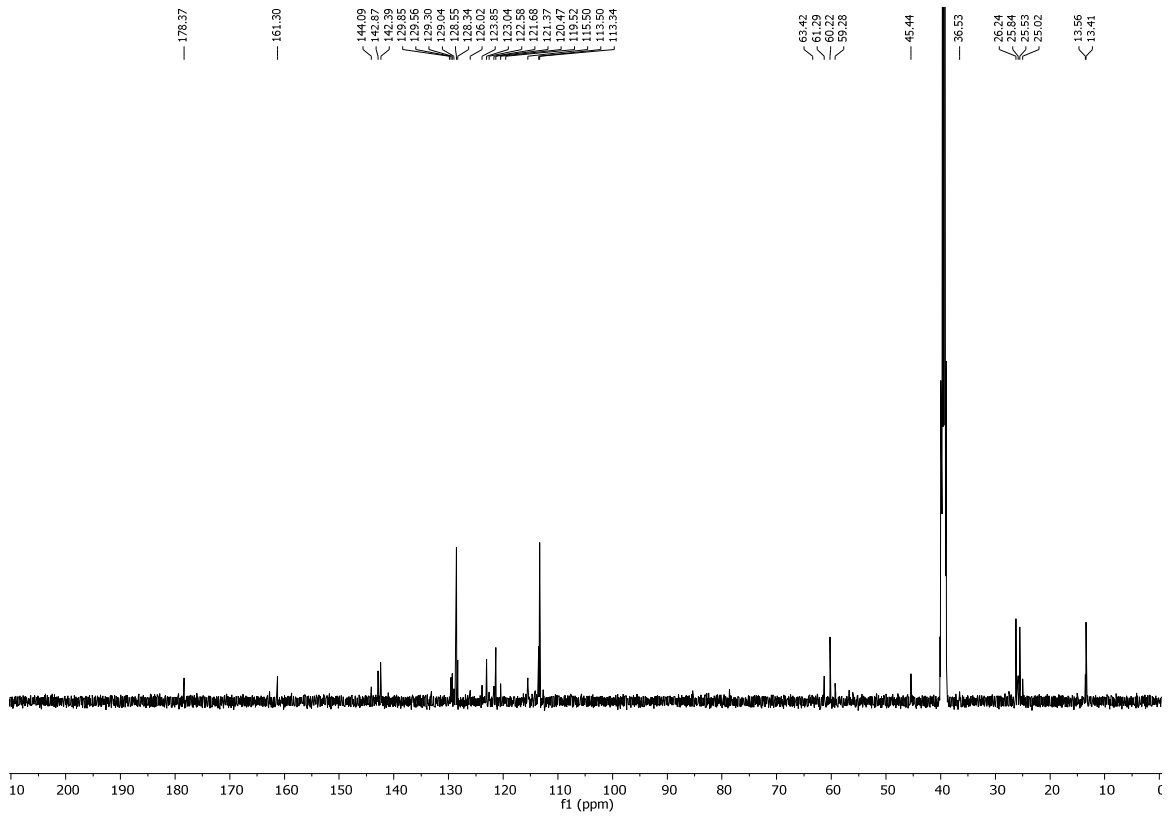

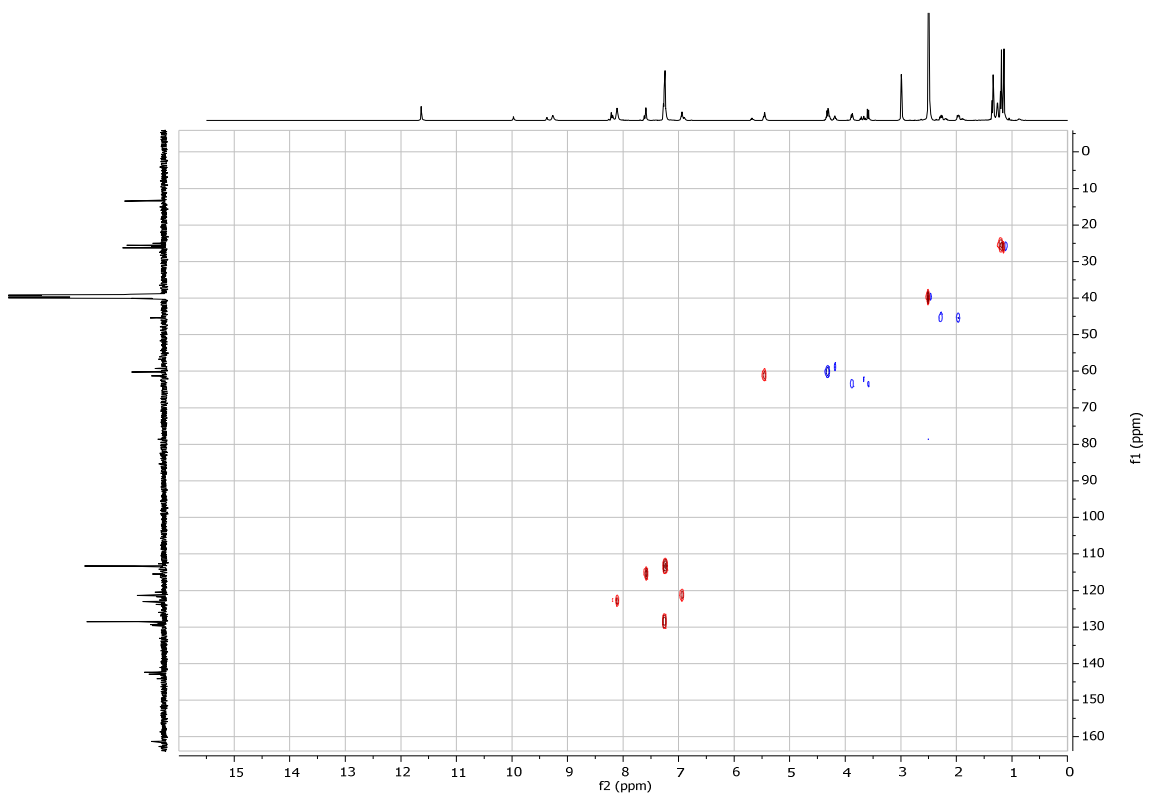

HSQC **6c**

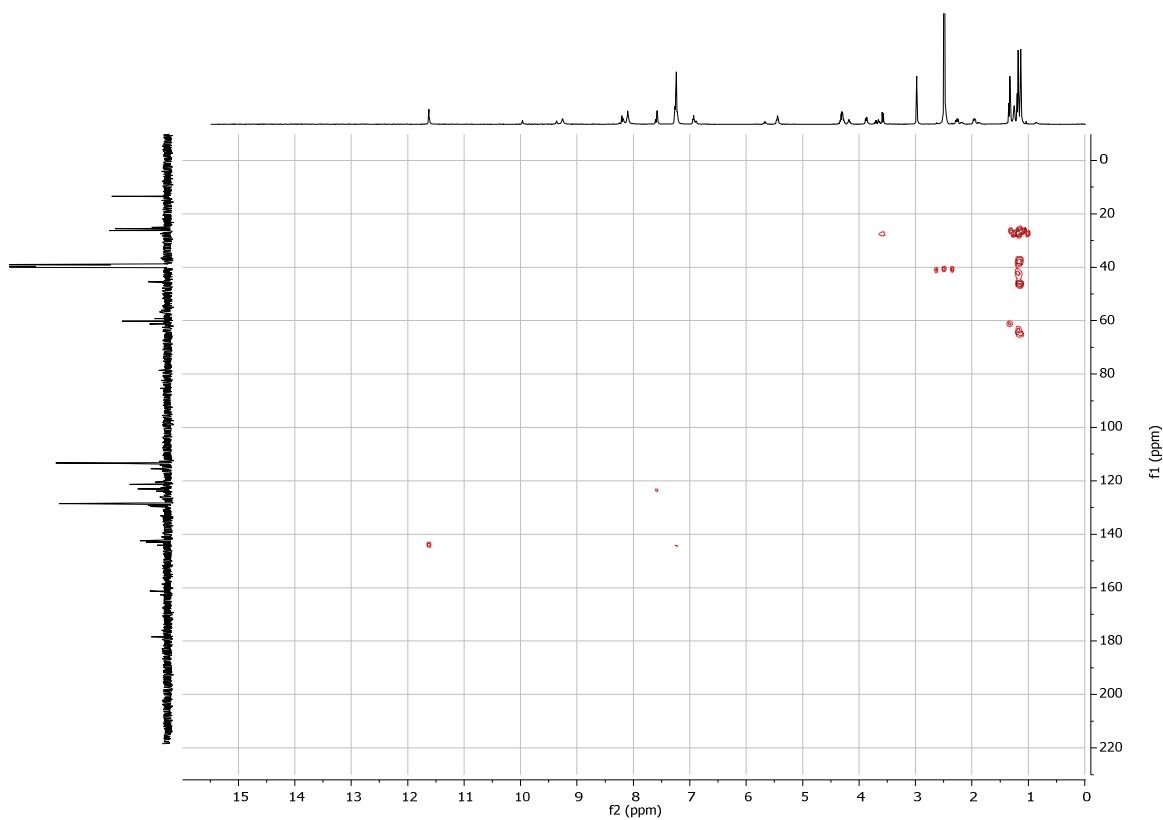

HMBC **6c**

**Figure SI-50.** NMR spectra for compound **6c** (DMSO-*d*<sub>6</sub>, 100°C)

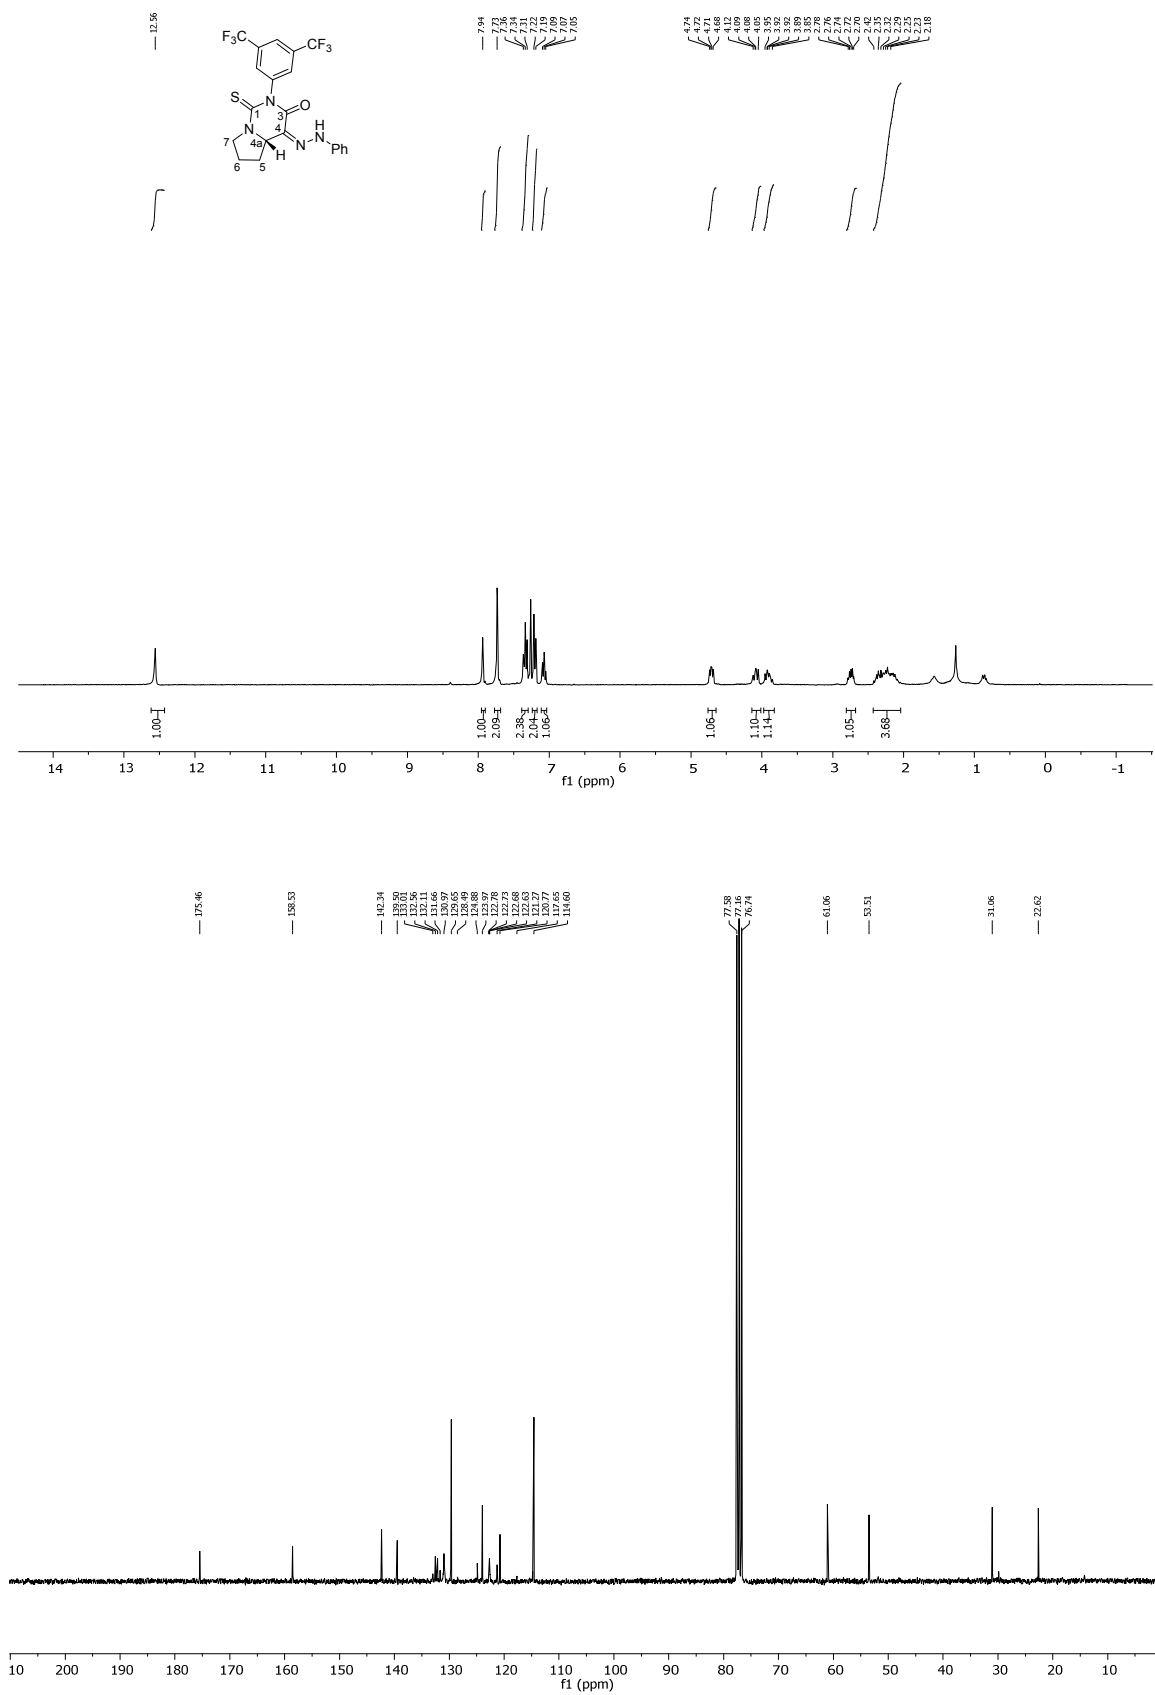

Figure SI-51. NMR spectra for compound **7a**



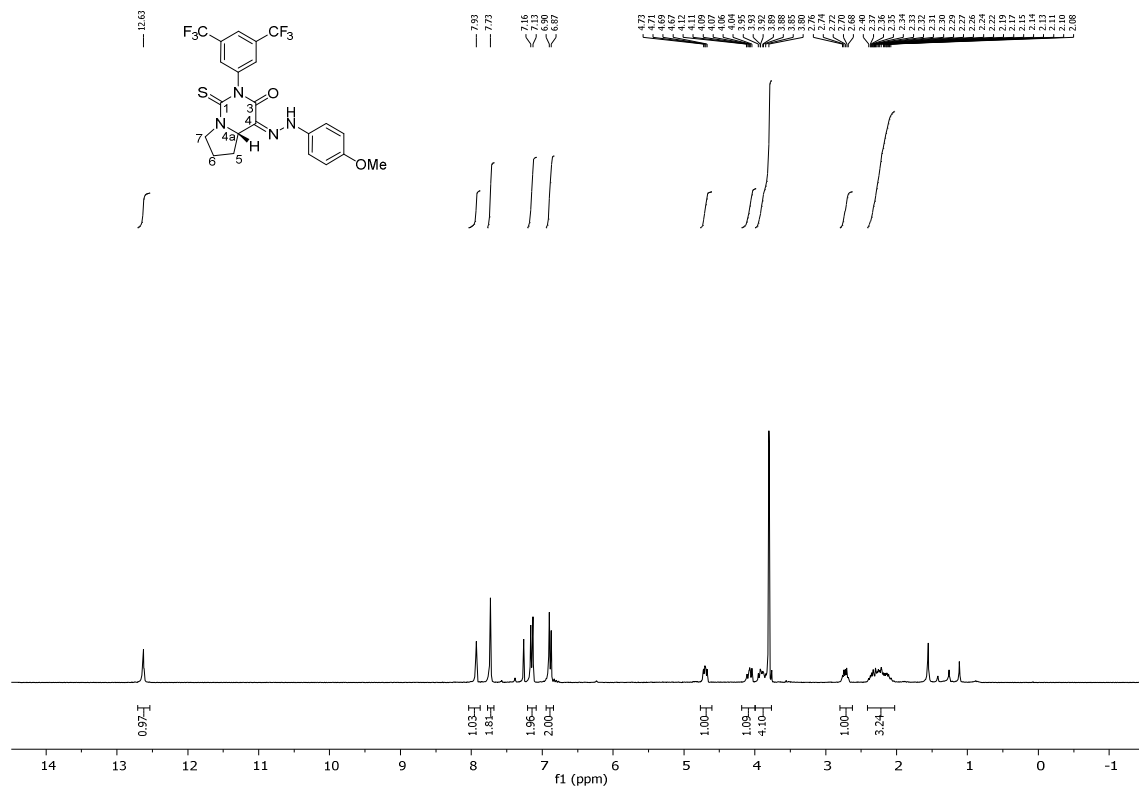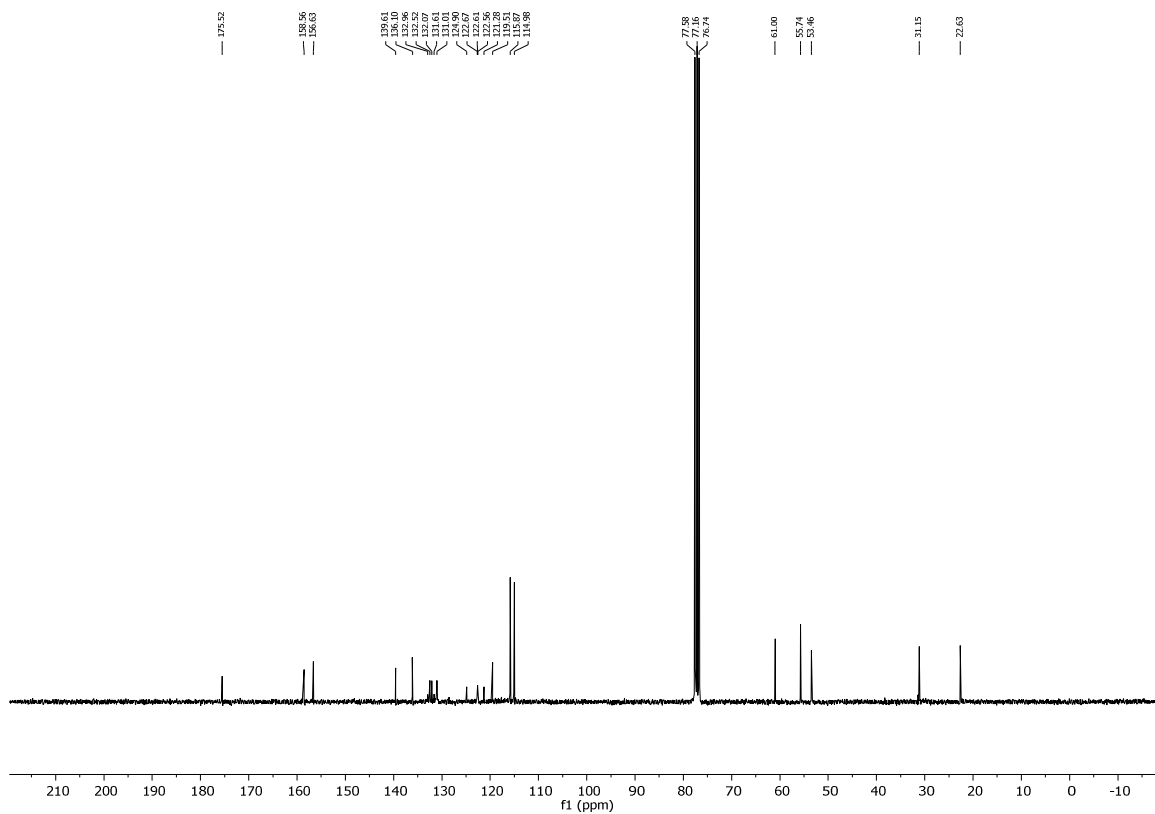

Figure SI-52. NMR spectra for compound **7b**

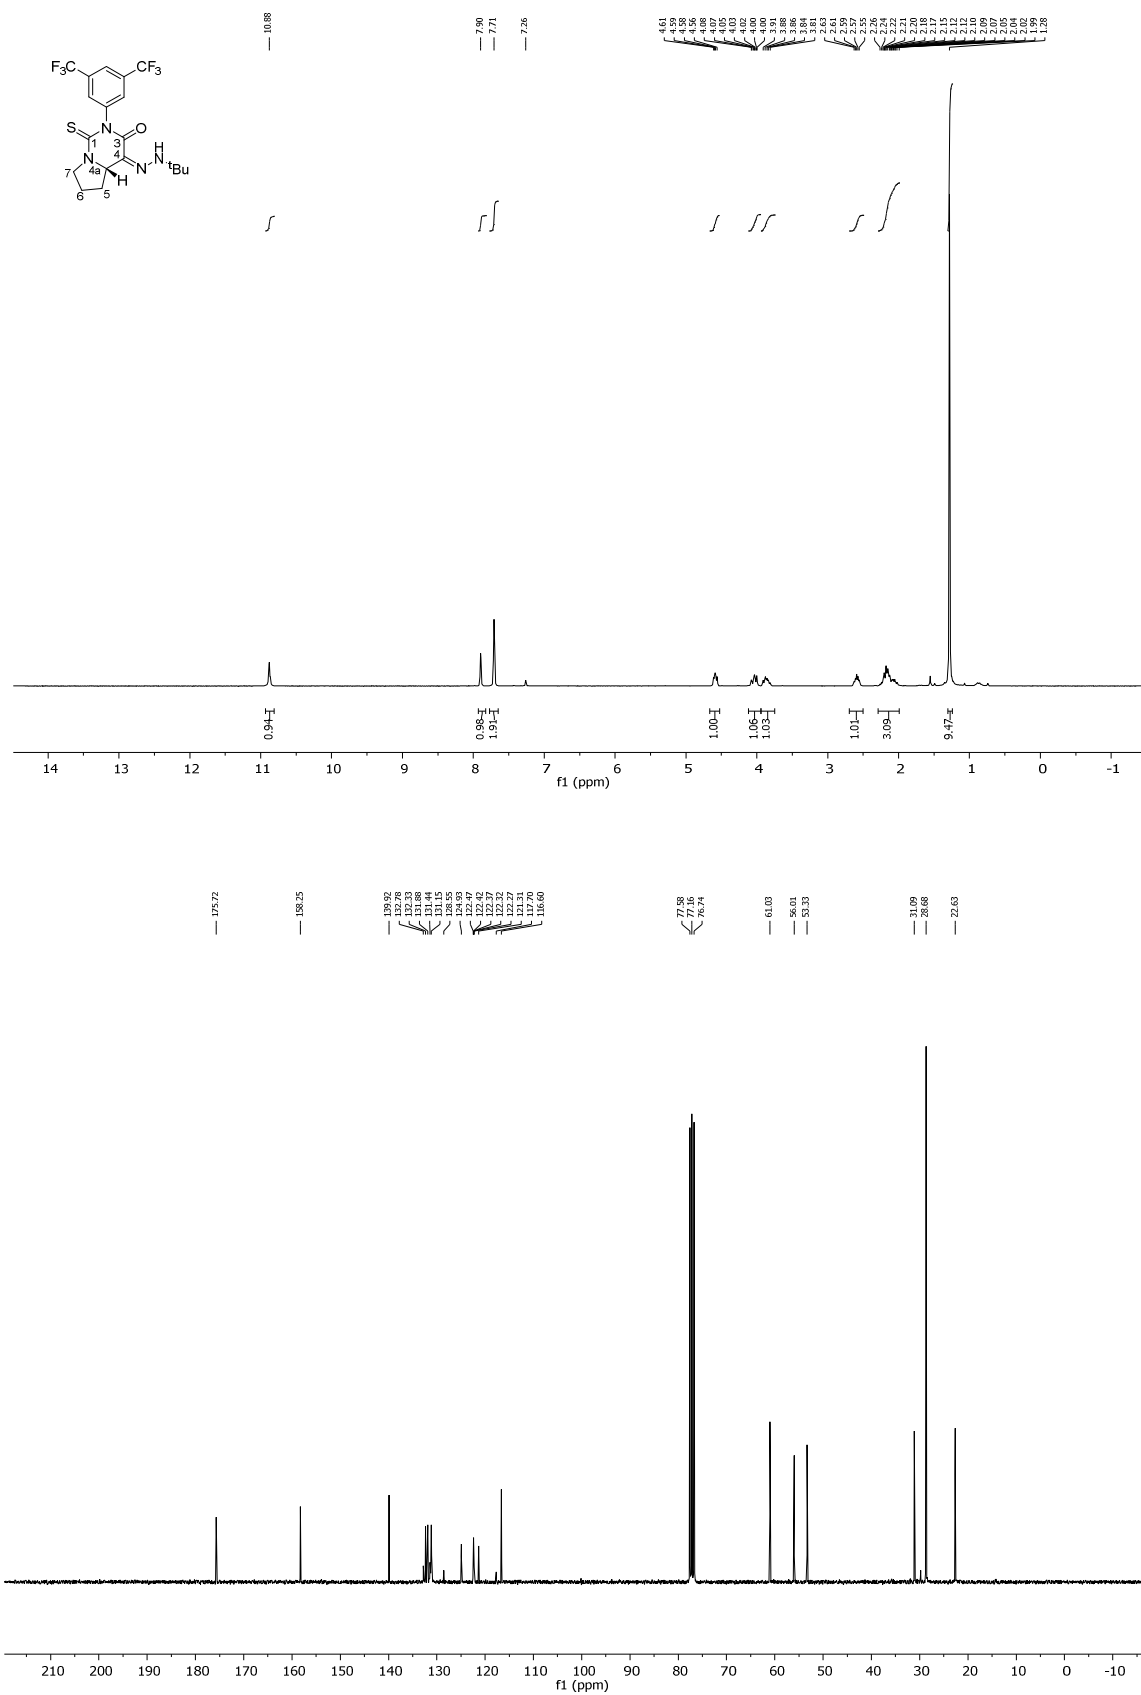

Figure SI-53. NMR spectra for compound 7c

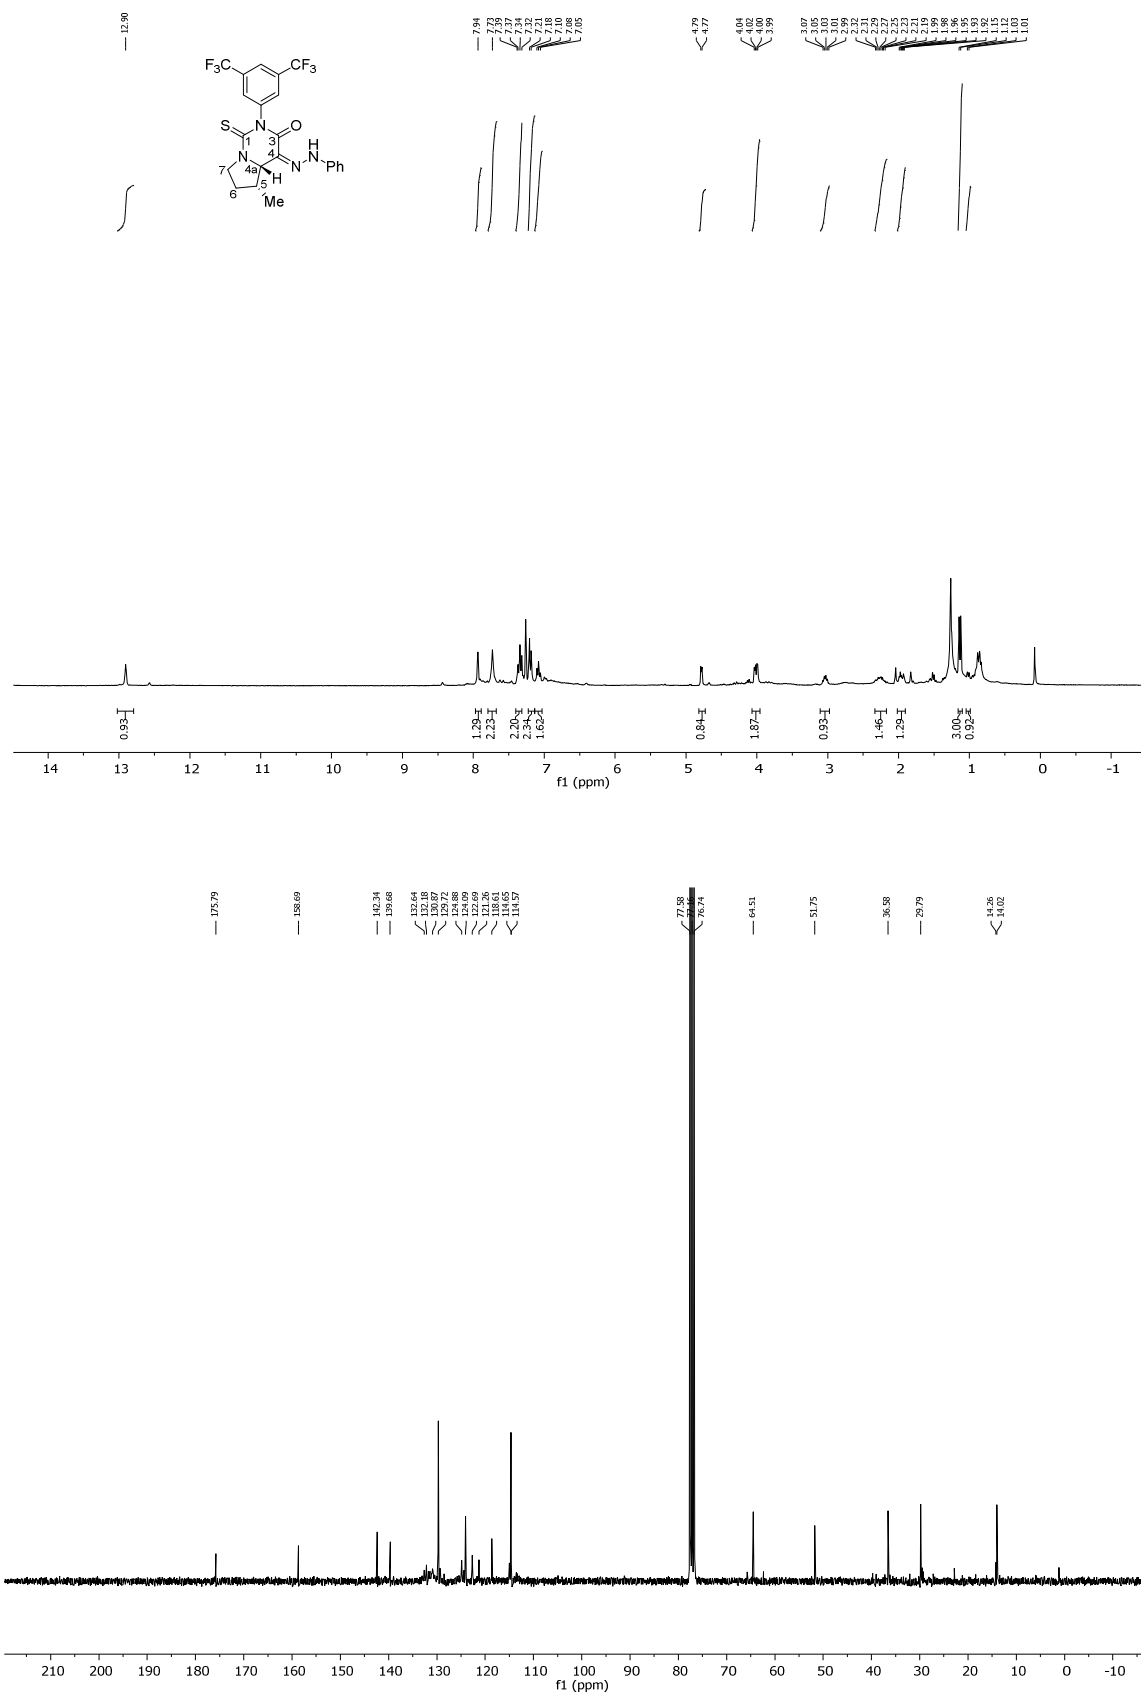

Figure SI-54. NMR spectra for compound 7d

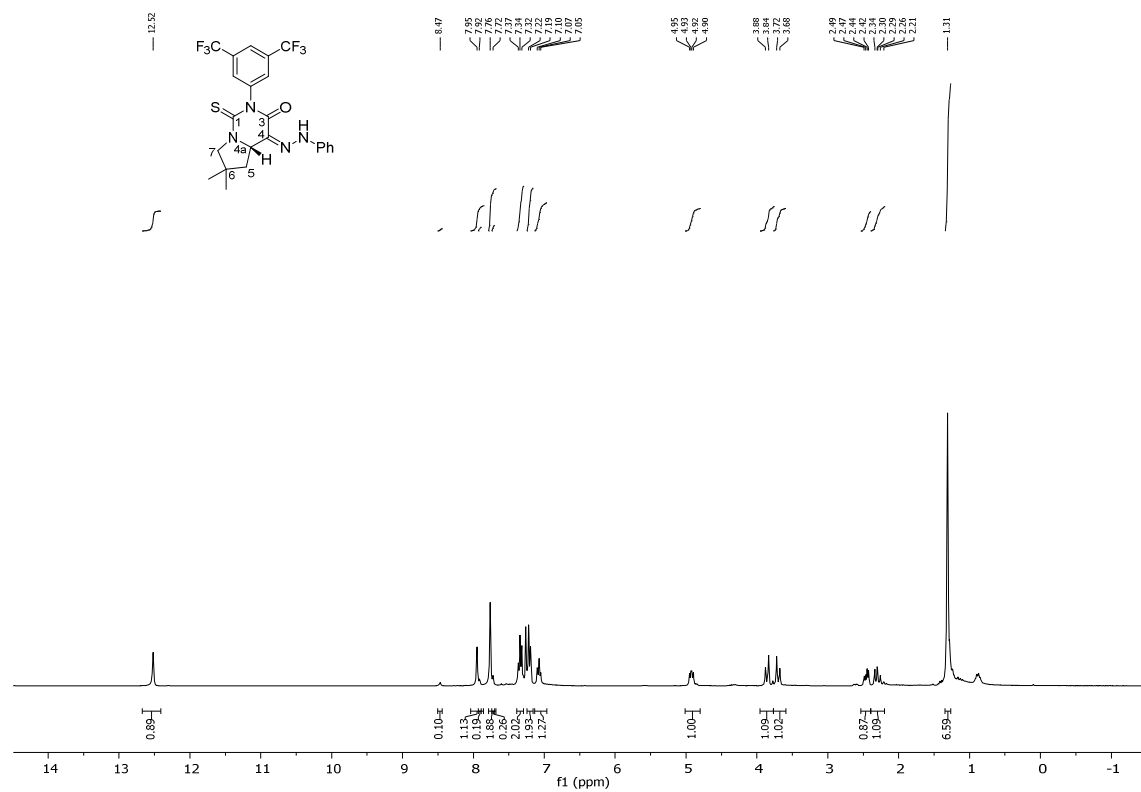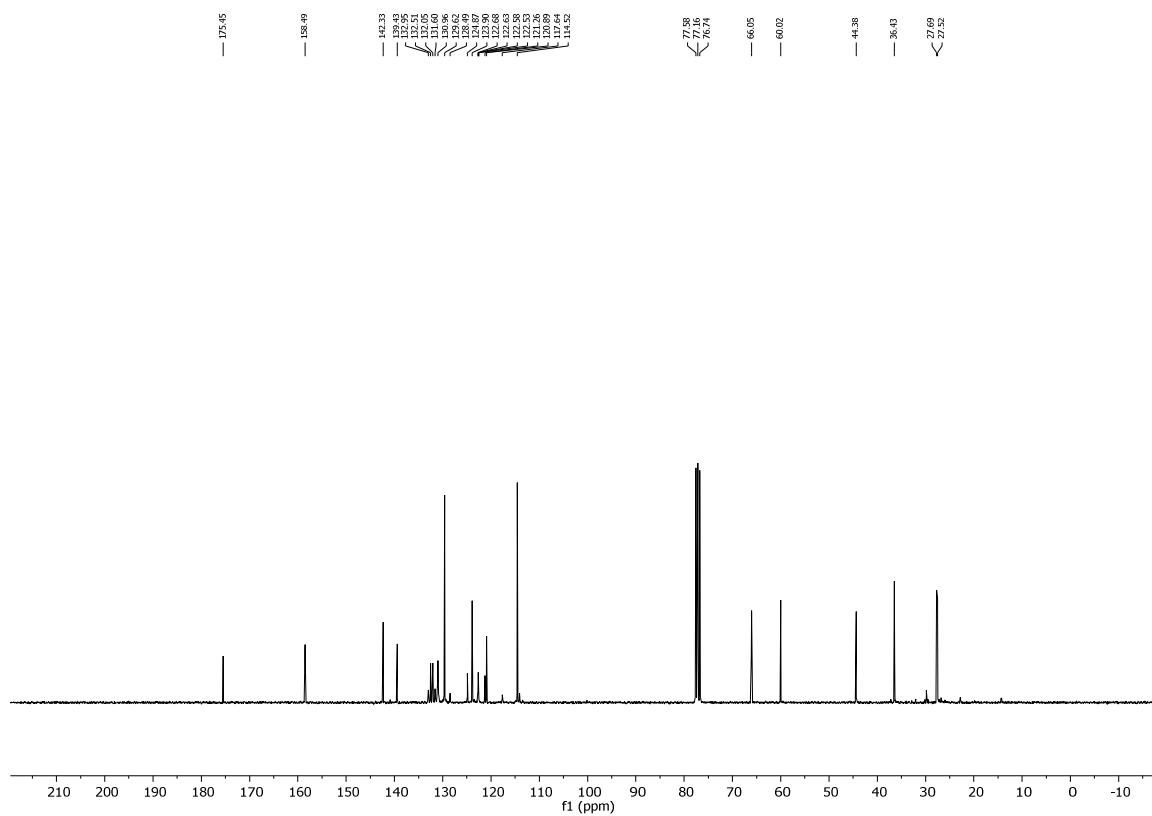

Figure SI-55. NMR spectra for compound 7e

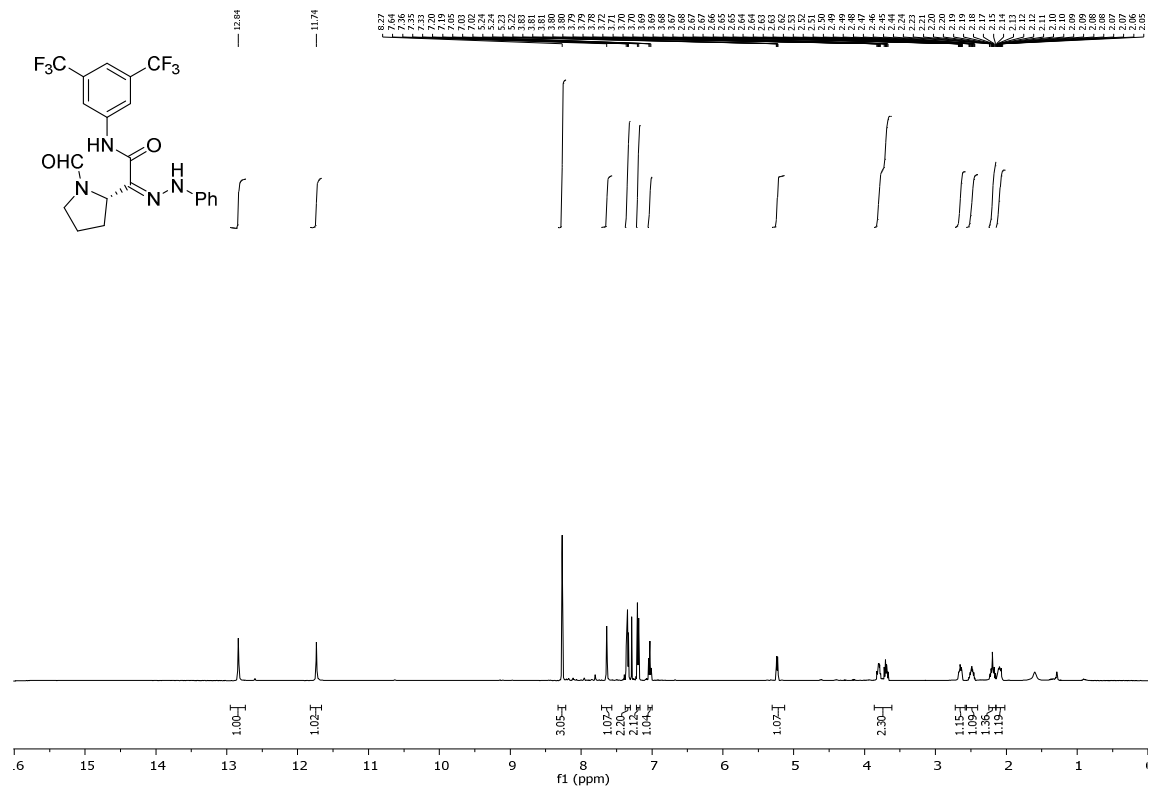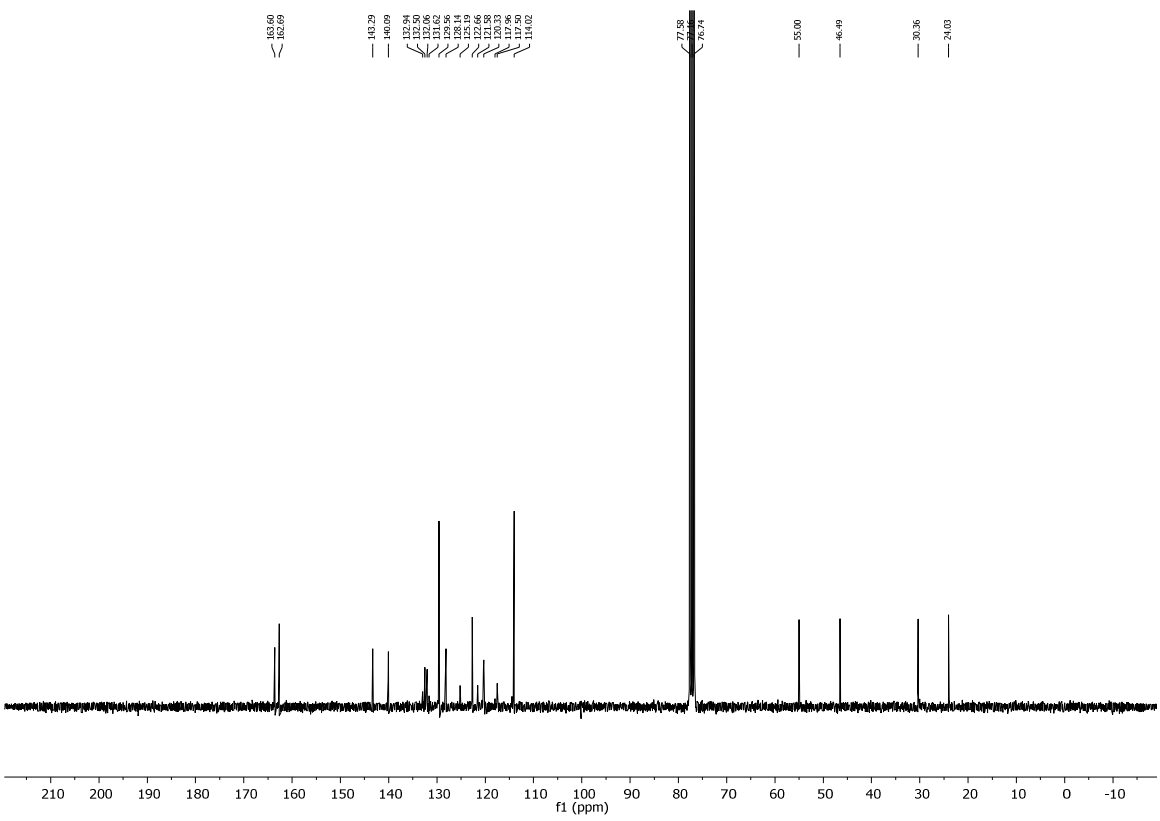

Figure SI-56. NMR spectra for compound 7a'

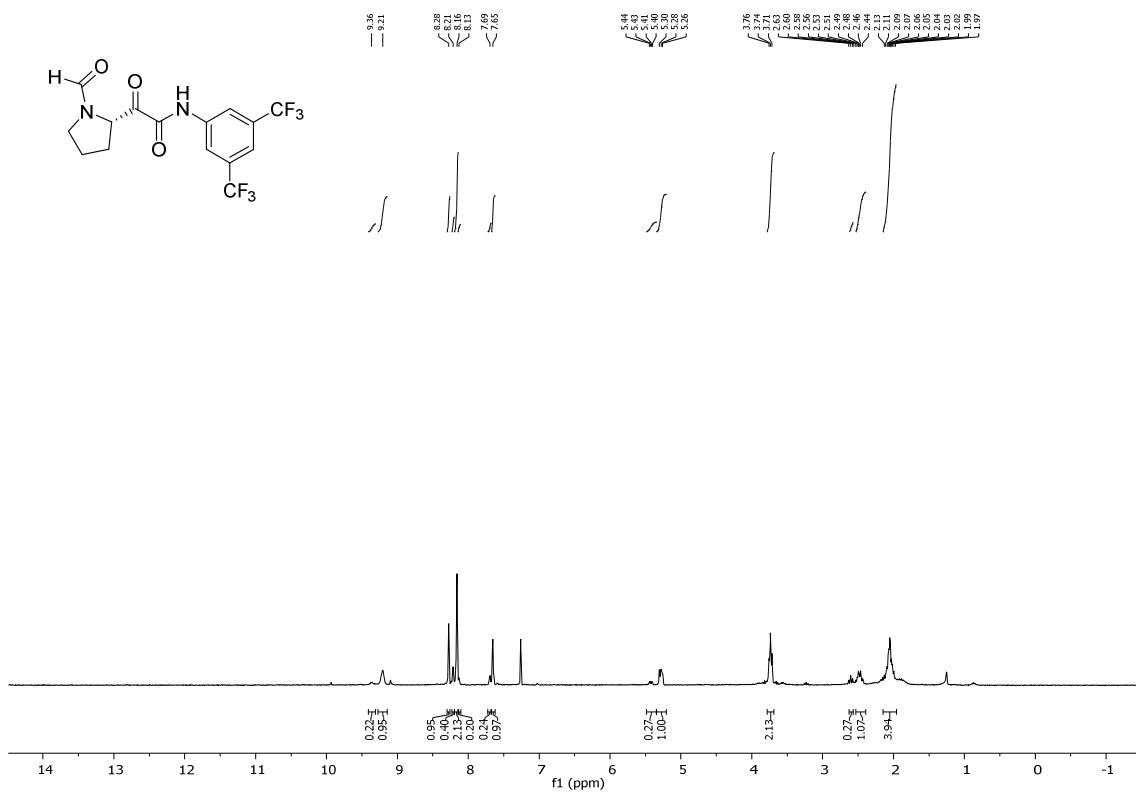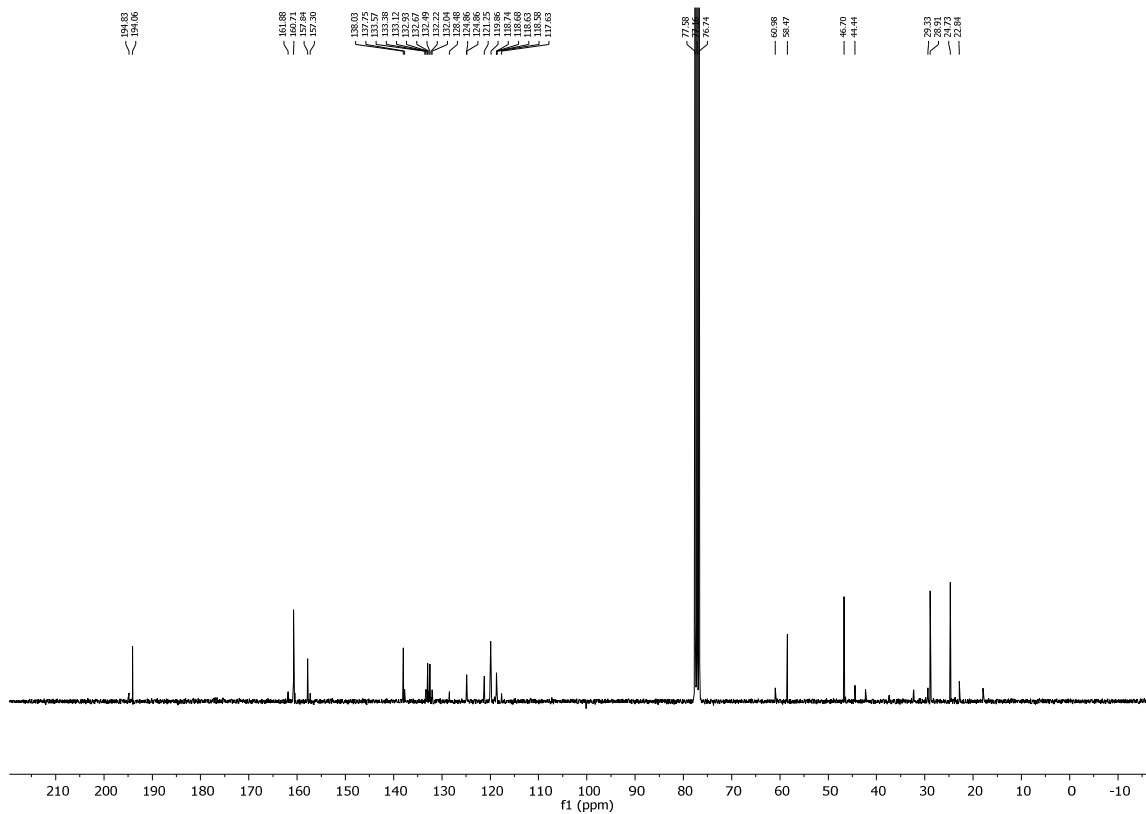

Figure SI-57. NMR spectra for compound 8a

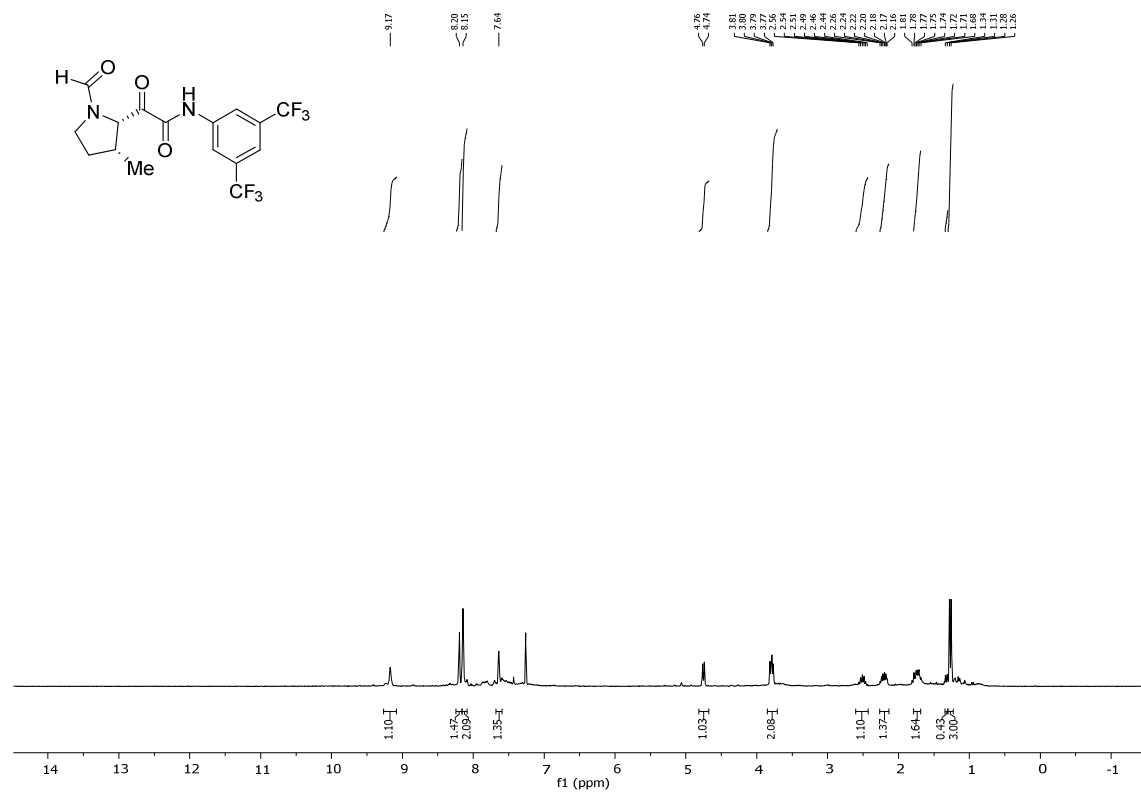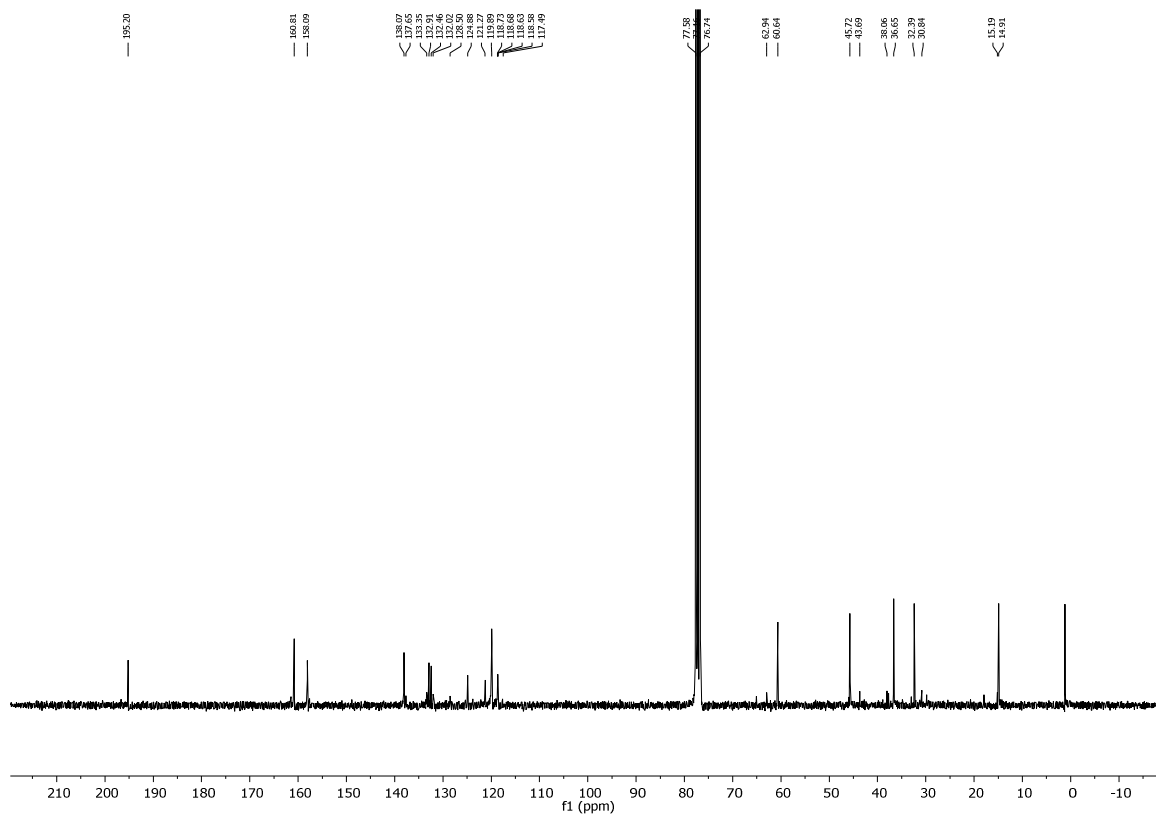

Figure SI-58. NMR spectra for compound **8b**

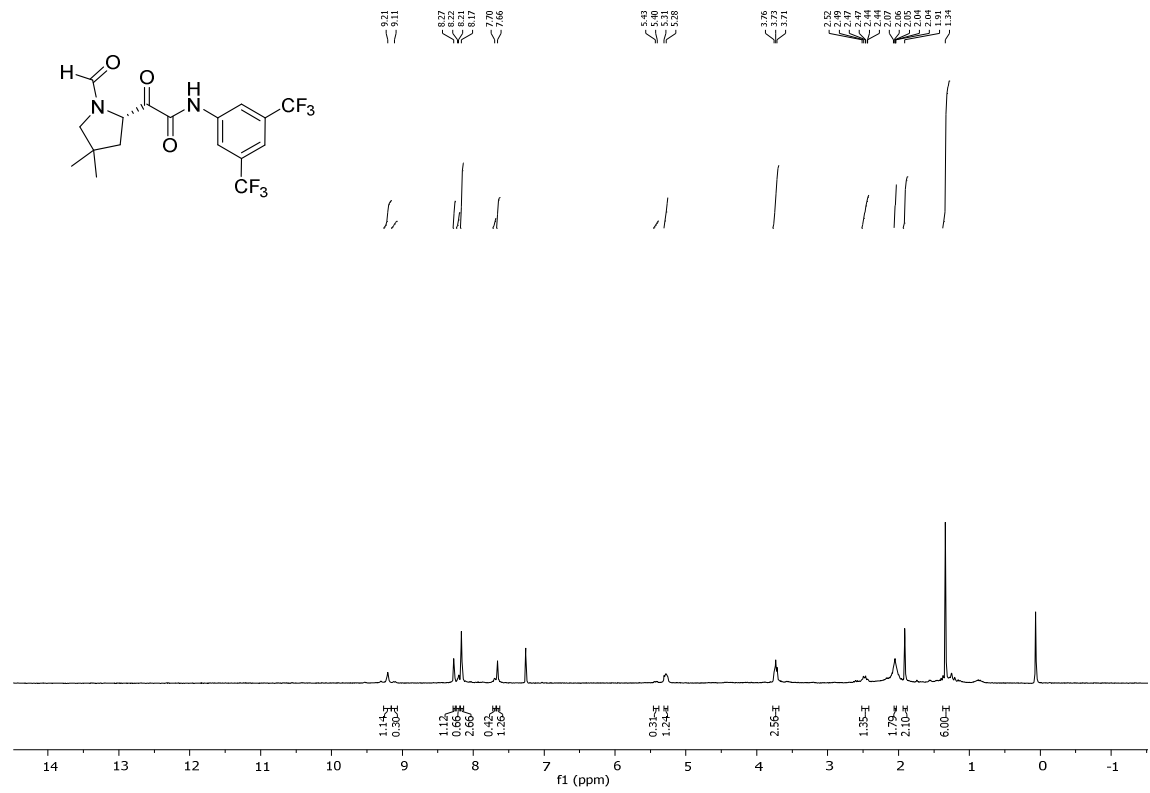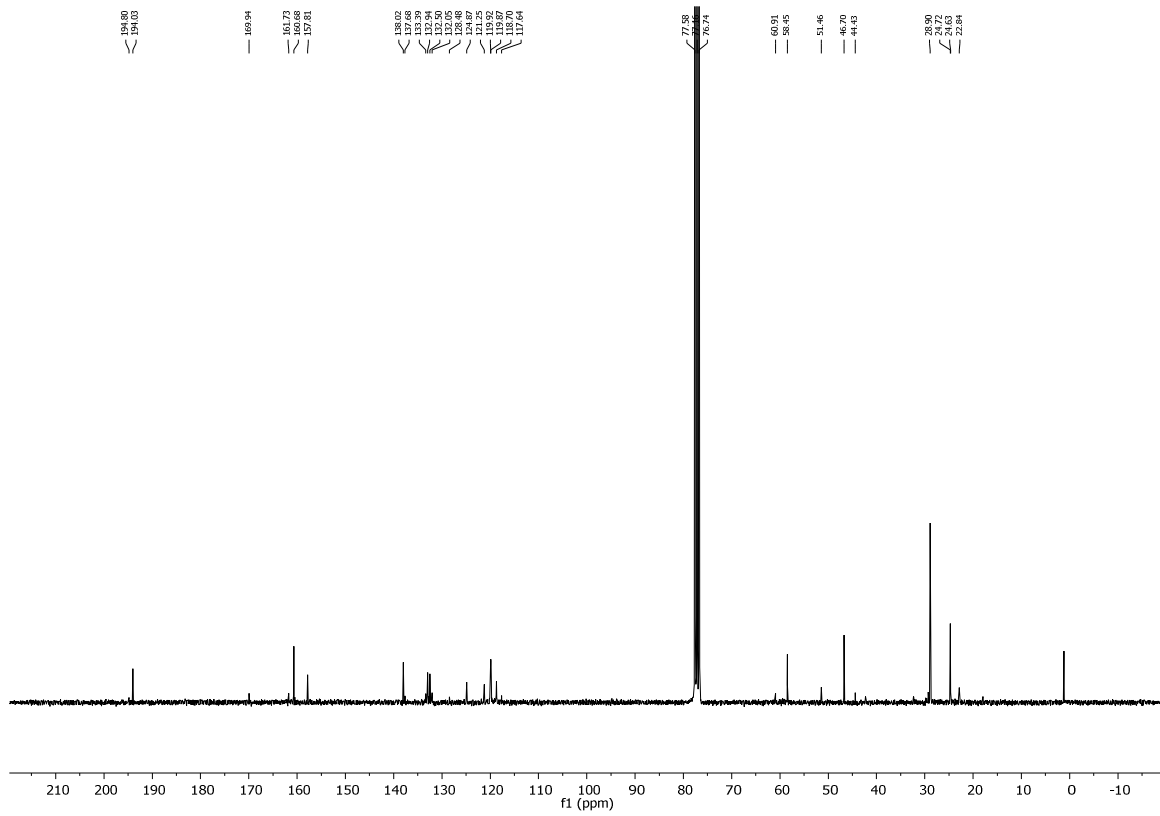

Figure SI-59. NMR spectra for compound 8c



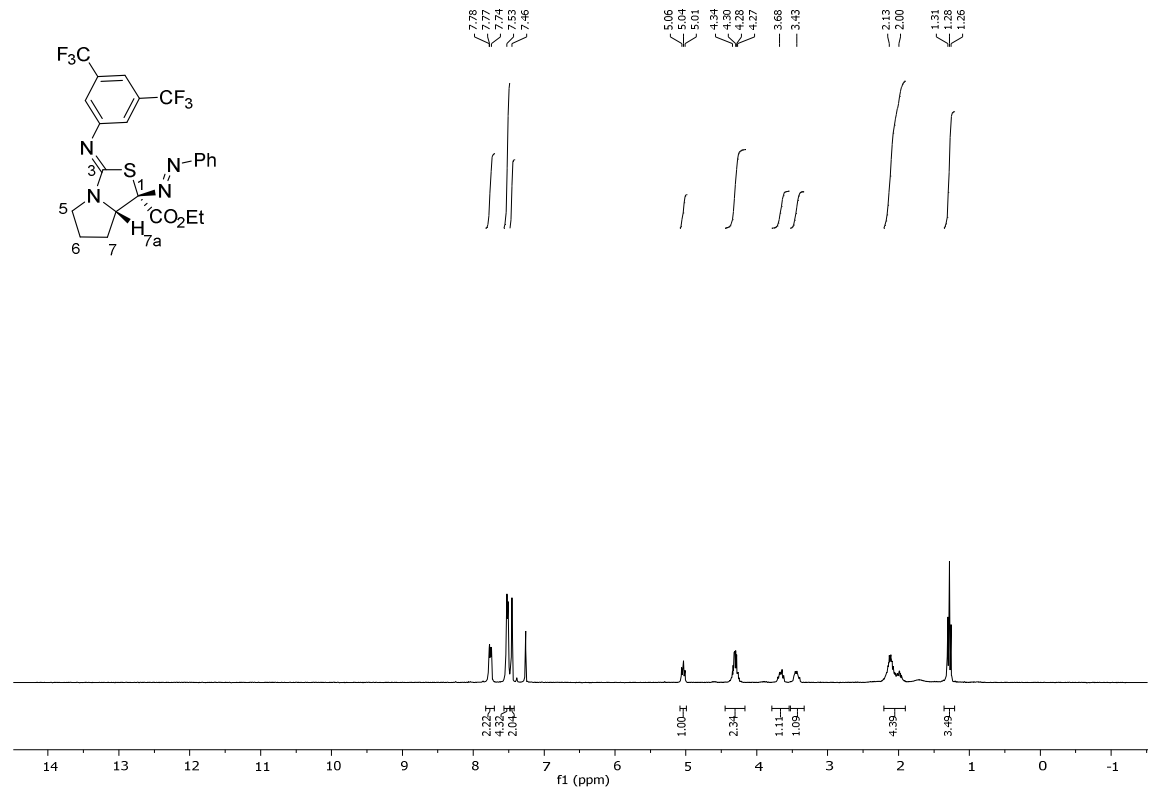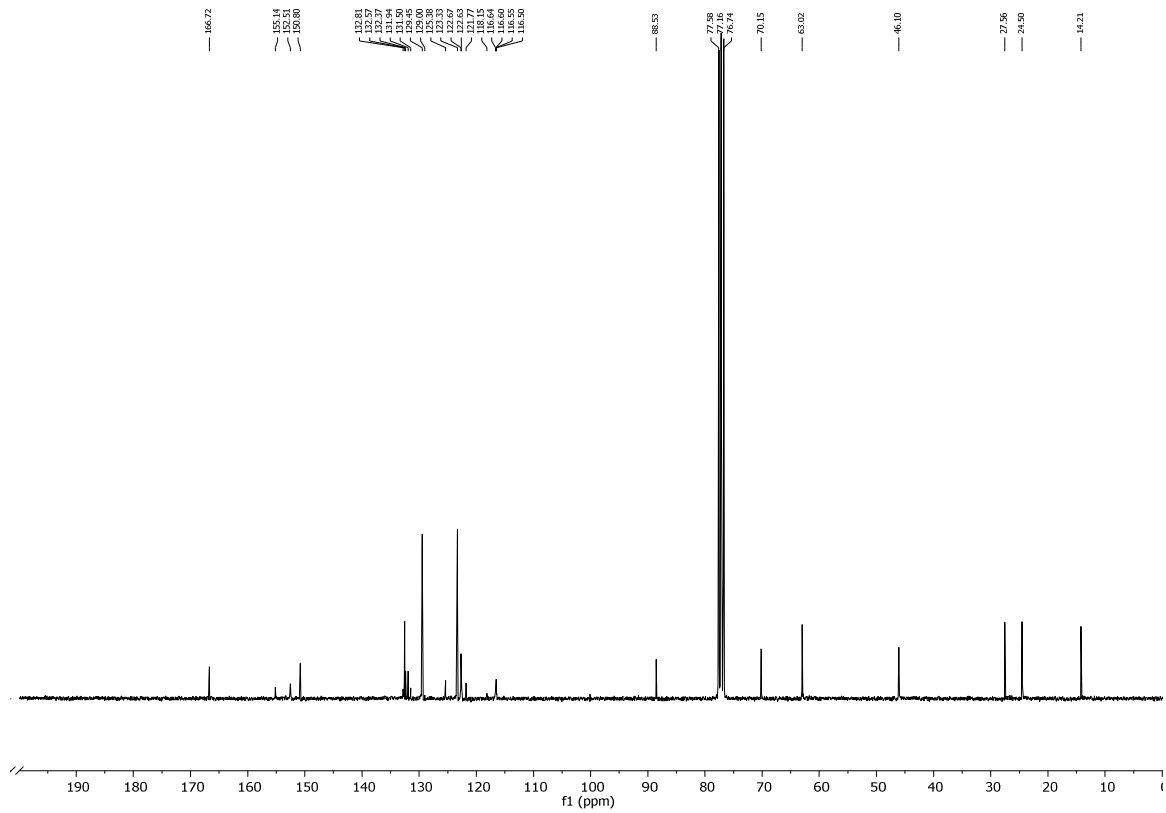

**Figure SI-60.** NMR spectra for compound **9a**

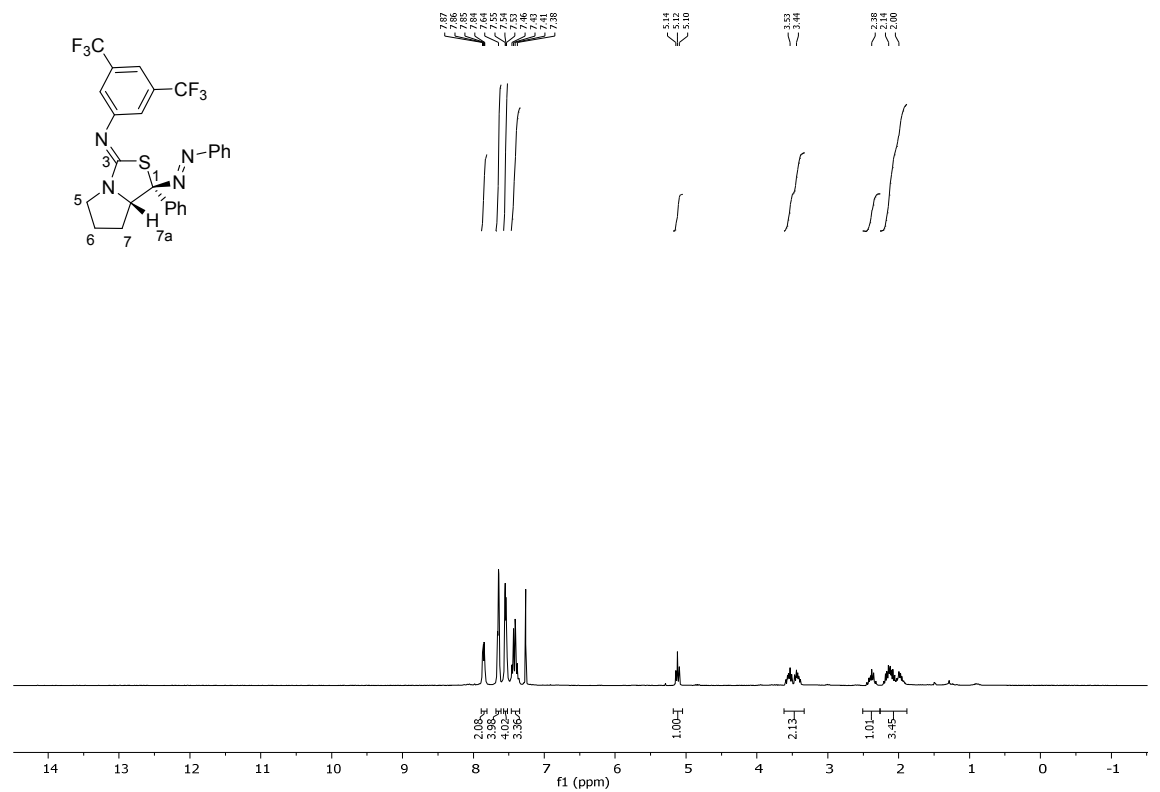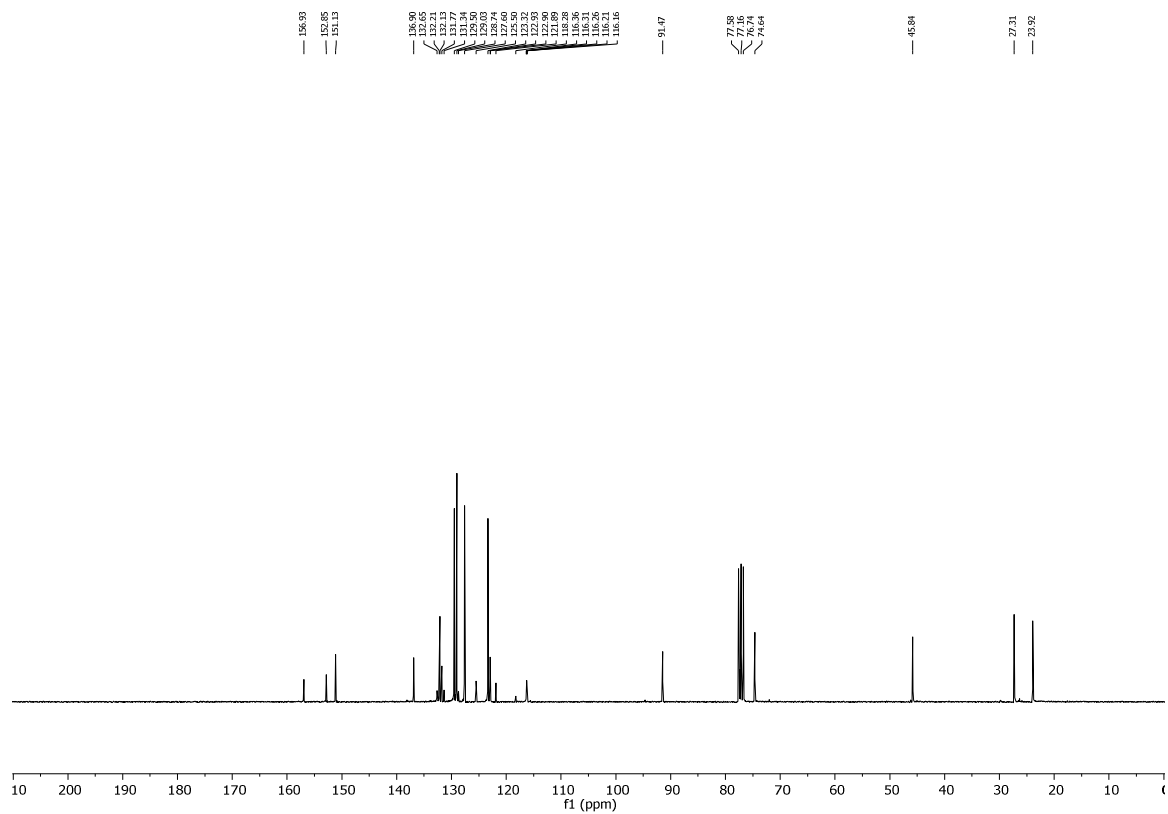

Figure SI-61. NMR spectra for compound 9b

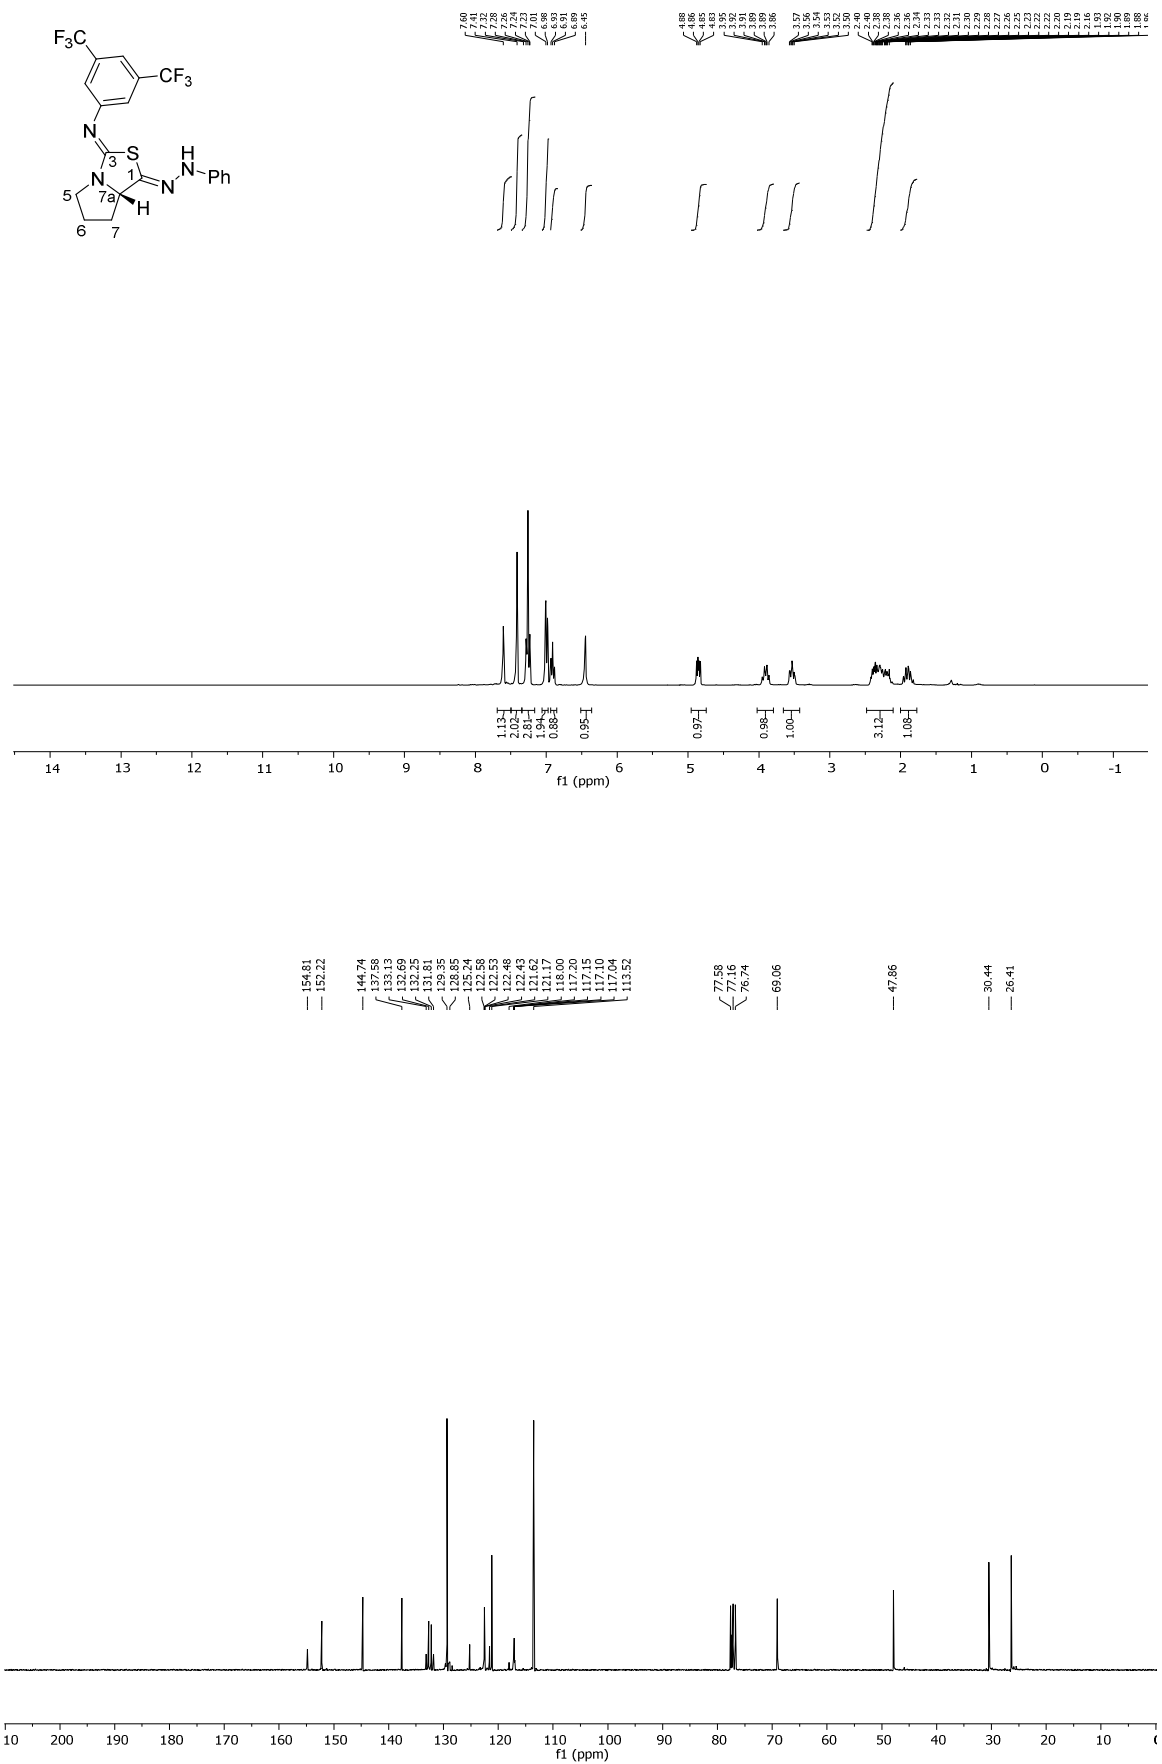

Figure SI-62. NMR spectra for compound **10**



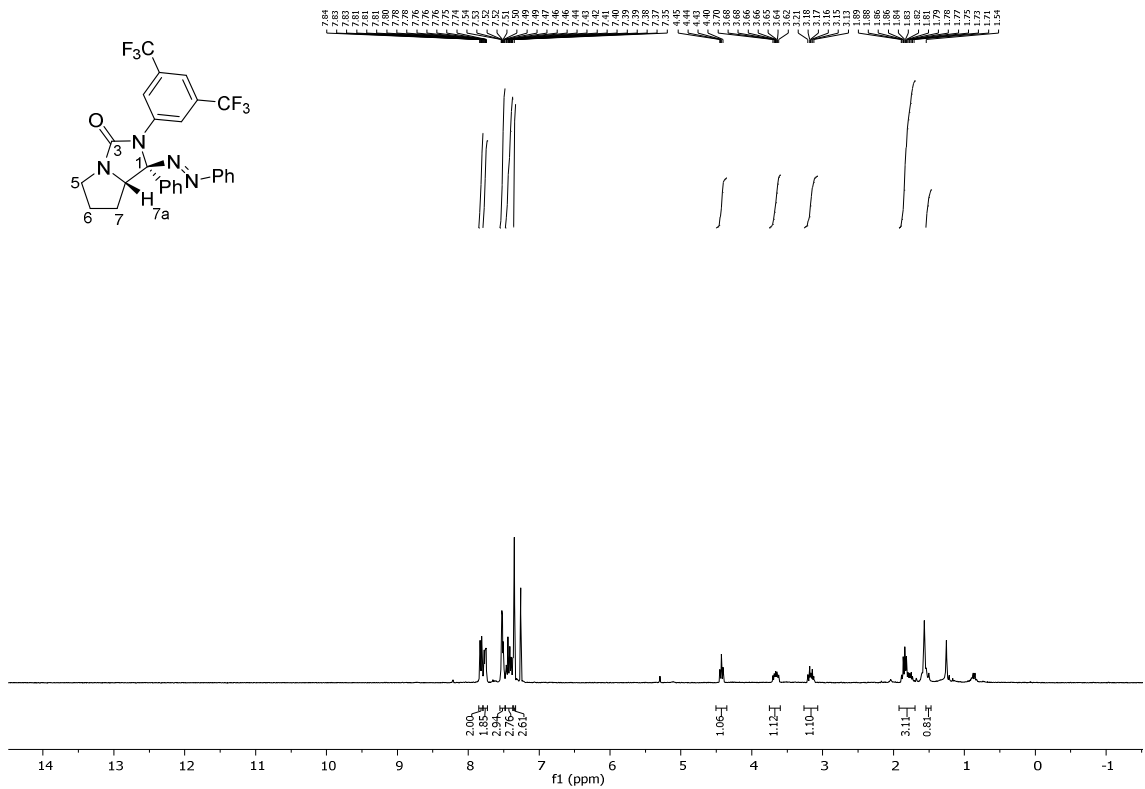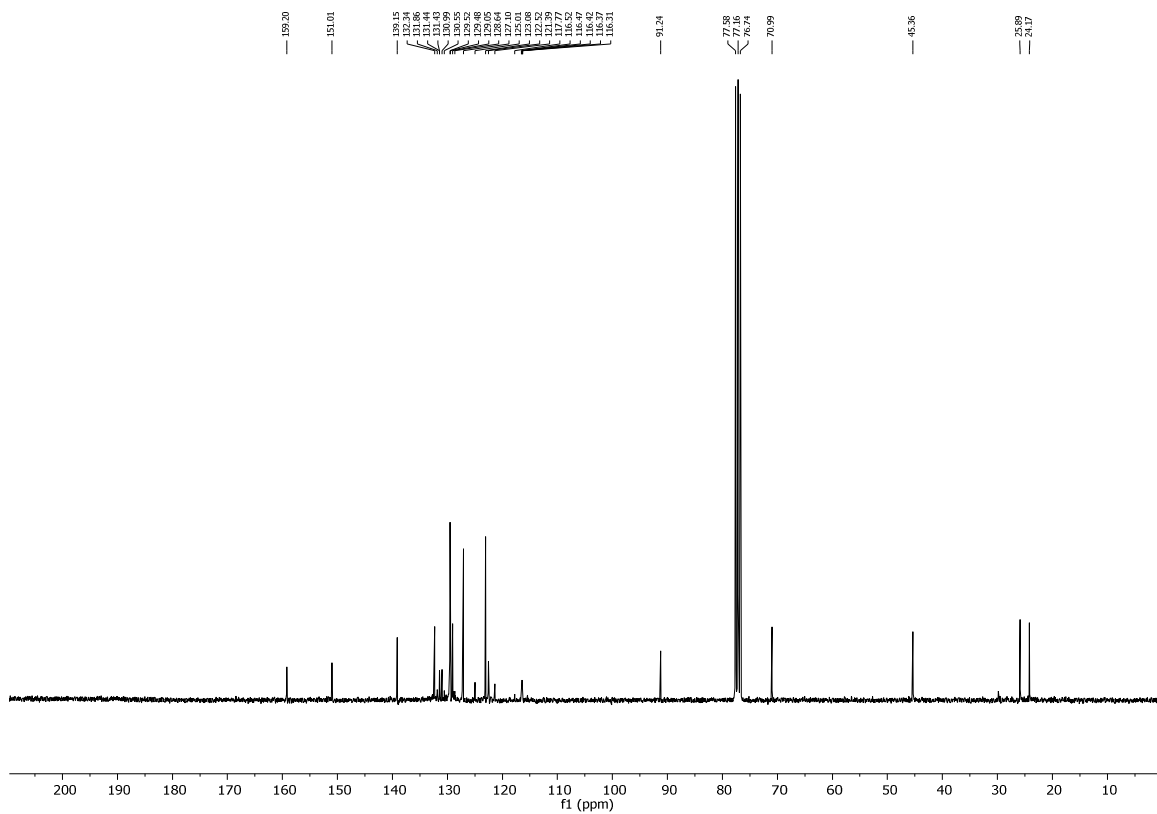

Figure SI-64. NMR spectra for compound 12

## 6. HPLC traces

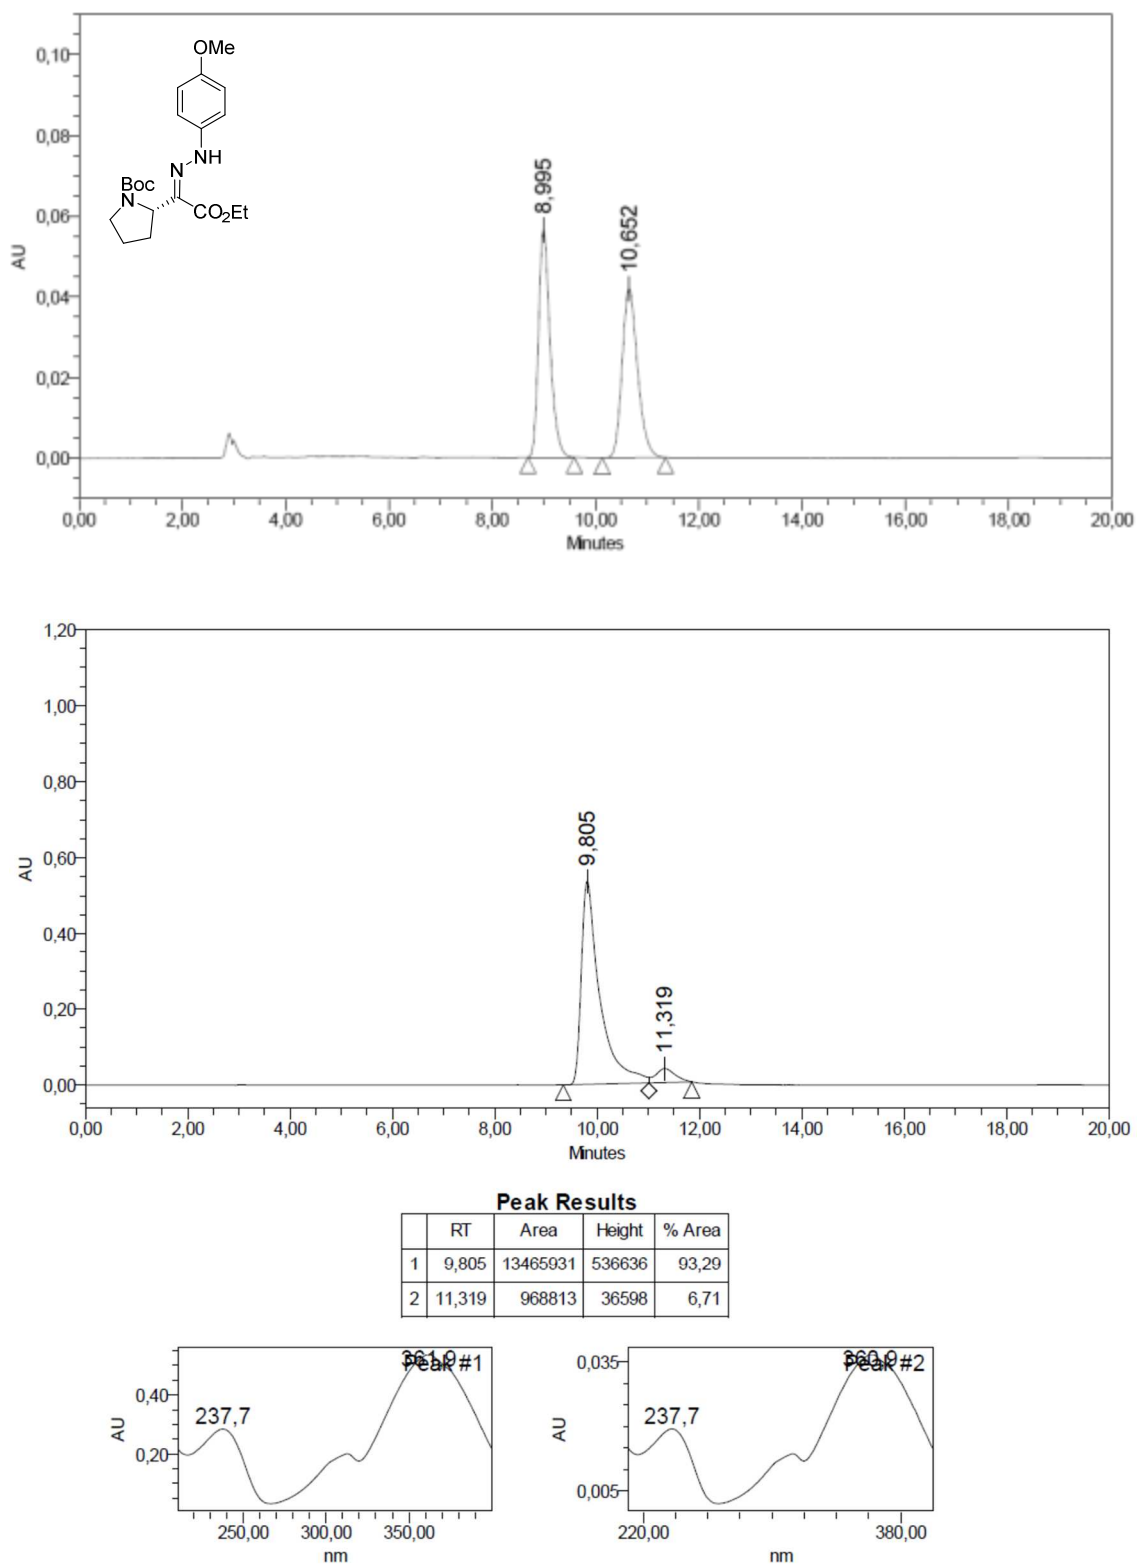

Figure SI-65. HPLC traces of compound 4a

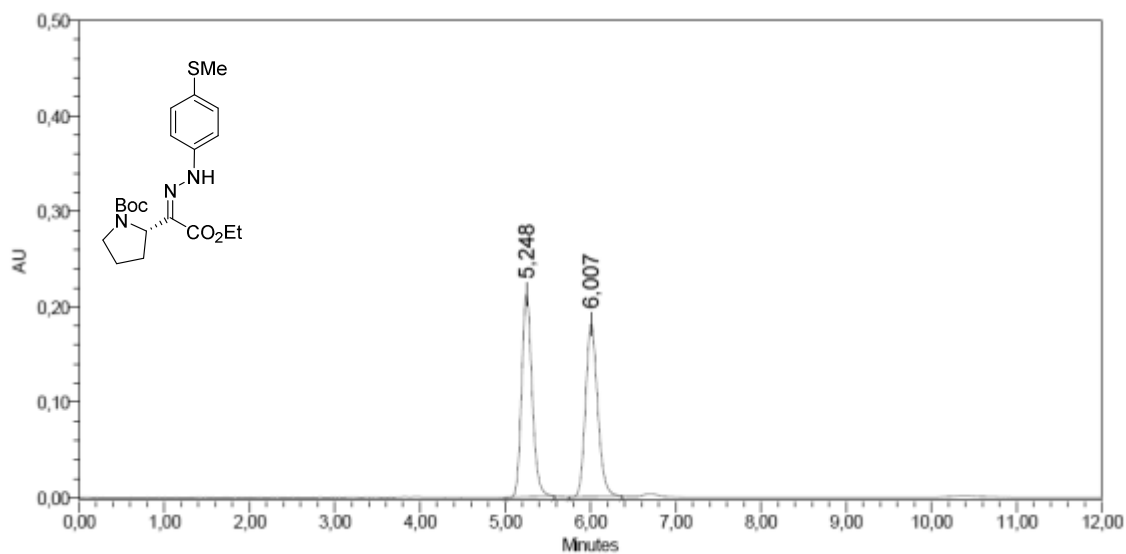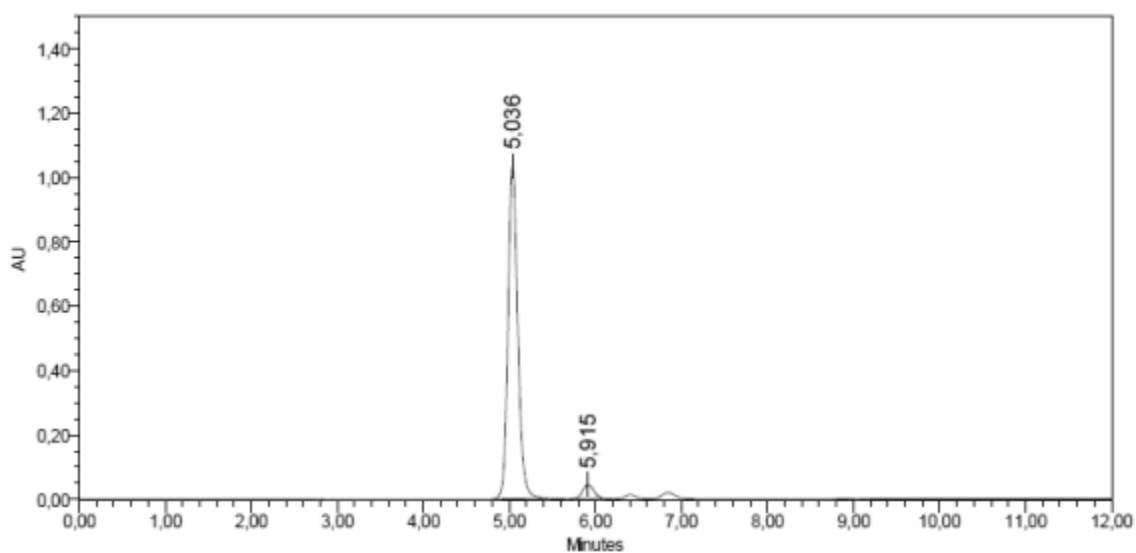

**Peak Results**

|   | RT    | Area    | Height  | % Area |
|---|-------|---------|---------|--------|
| 1 | 5,036 | 8161609 | 1035446 | 95,78  |
| 2 | 5,915 | 359474  | 42078   | 4,22   |

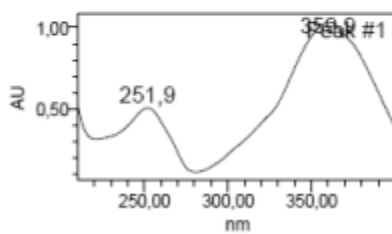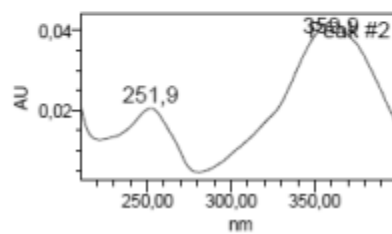

**Figure SI-66.** HPLC traces of compound **4b**

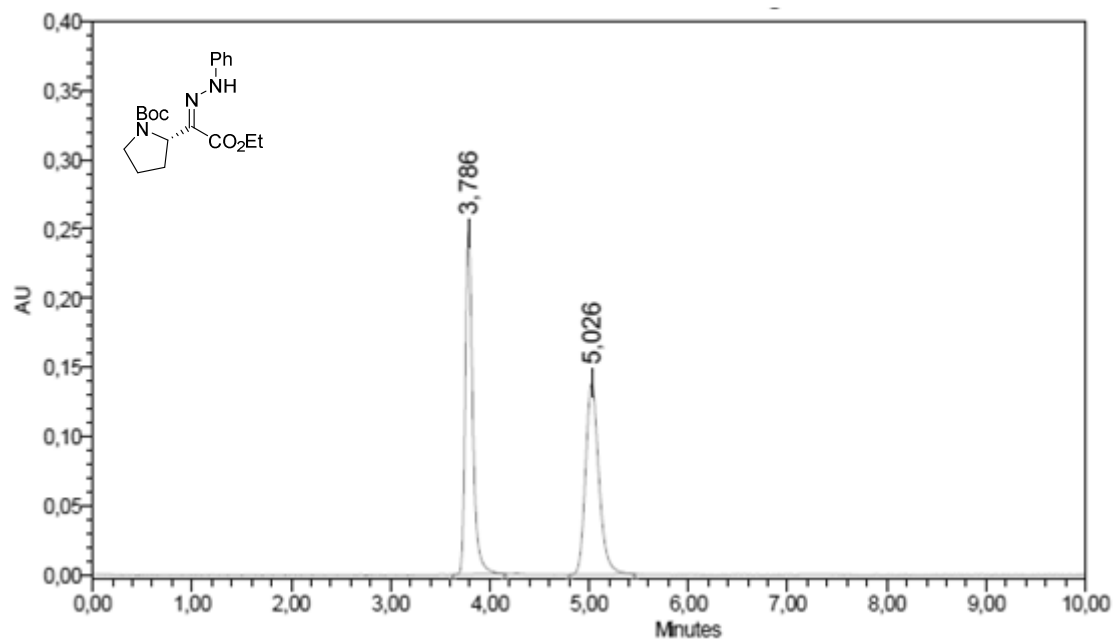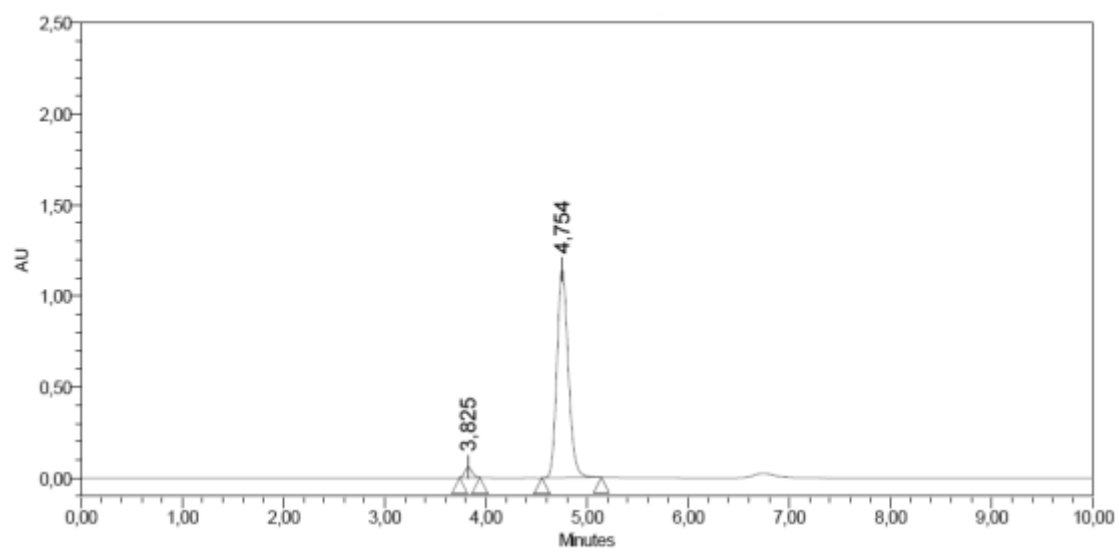

**Peak Results**

|   | RT    | Area    | Height  | % Area |
|---|-------|---------|---------|--------|
| 1 | 3,825 | 291093  | 57952   | 3,16   |
| 2 | 4,754 | 8915927 | 1143319 | 96,84  |

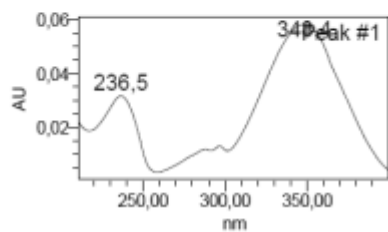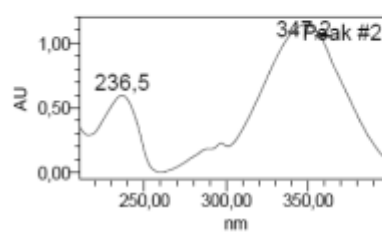

**Figure SI-67.** HPLC traces of compound **4c**



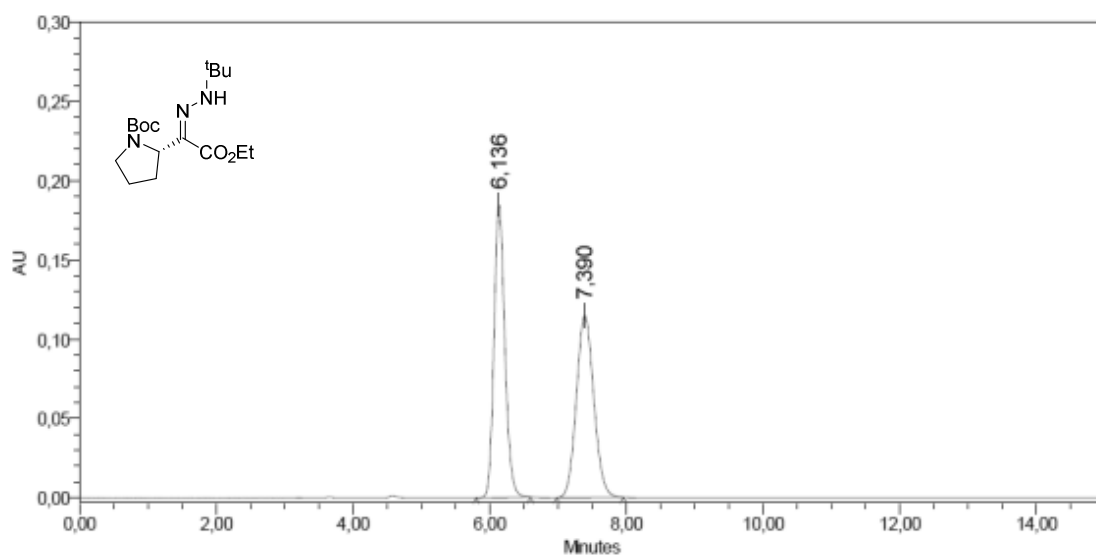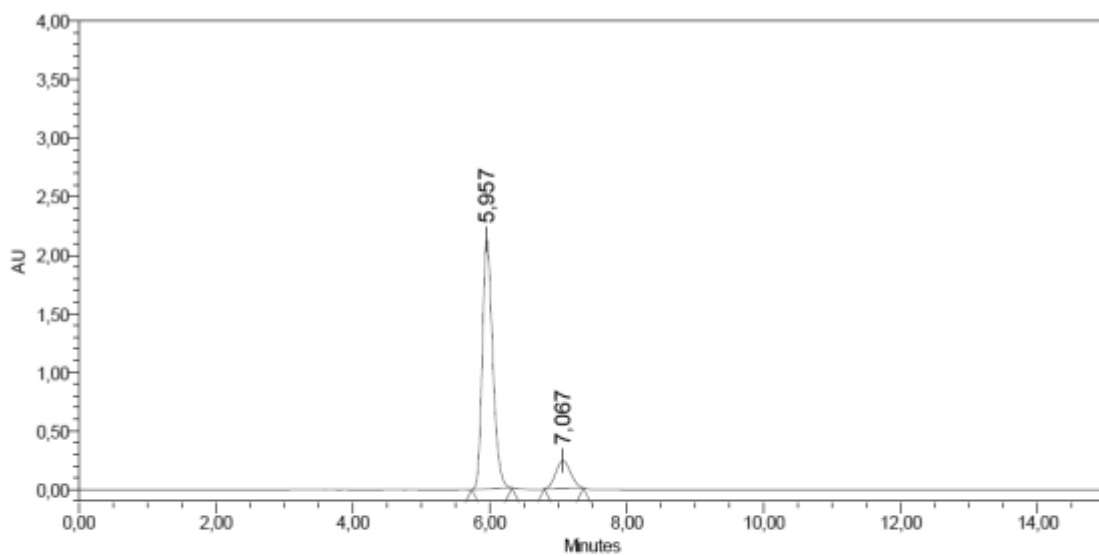

**Peak Results**

|   | RT    | Area     | Height  | % Area |
|---|-------|----------|---------|--------|
| 1 | 5,957 | 22493123 | 2131286 | 86,26  |
| 2 | 7,067 | 3582735  | 238327  | 13,74  |

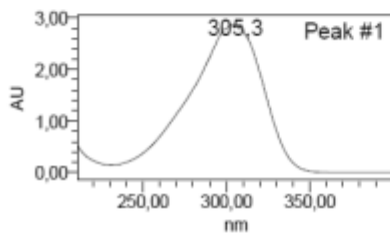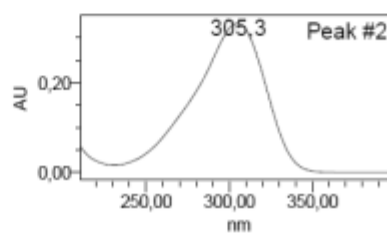

**Figure SI-68.** HPLC traces of compound 4e

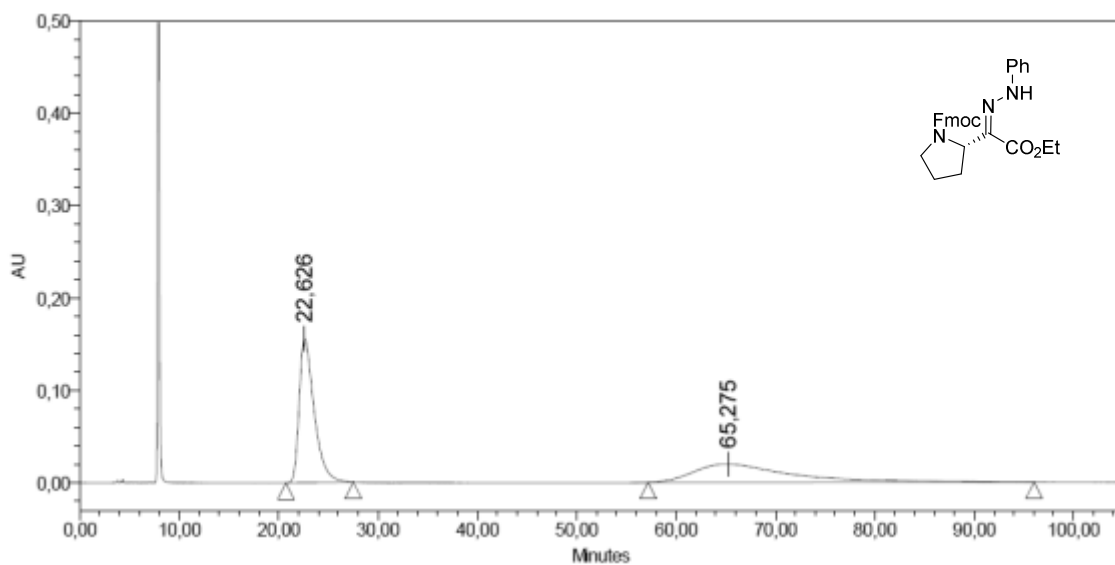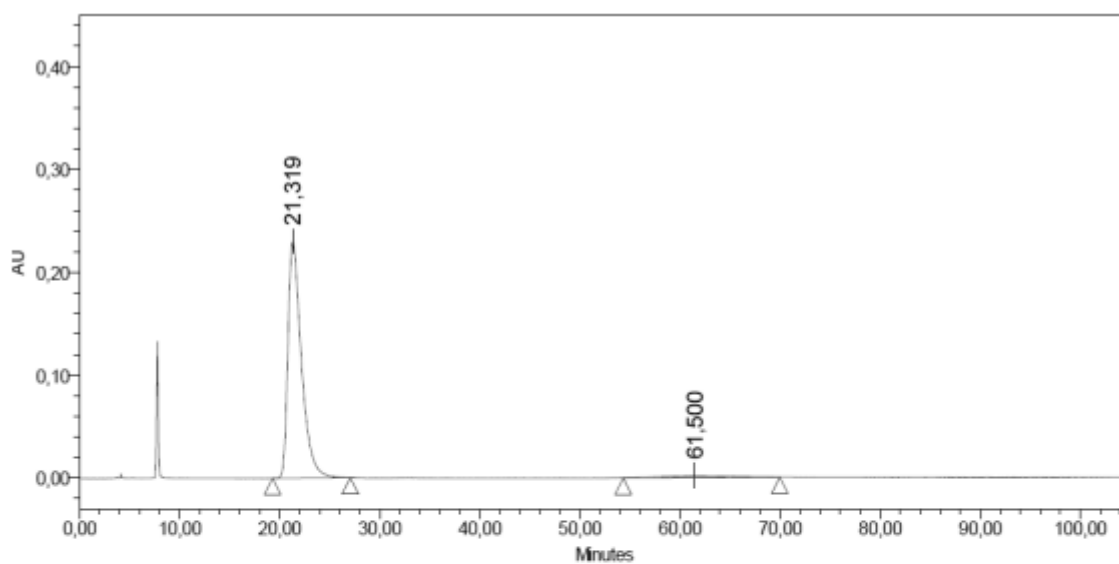

**Peak Results**

|   | RT     | Area     | Height | % Area |
|---|--------|----------|--------|--------|
| 1 | 21,319 | 21471387 | 230252 | 96,18  |
| 2 | 61,500 | 851754   | 1843   | 3,82   |

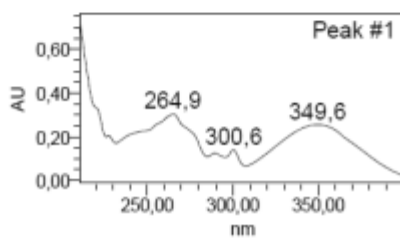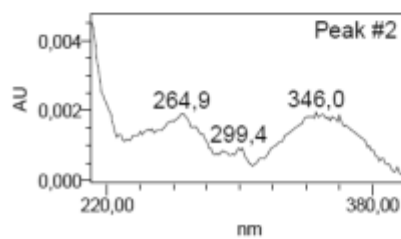

**Figure SI-69.** HPLC traces of compound **4f**

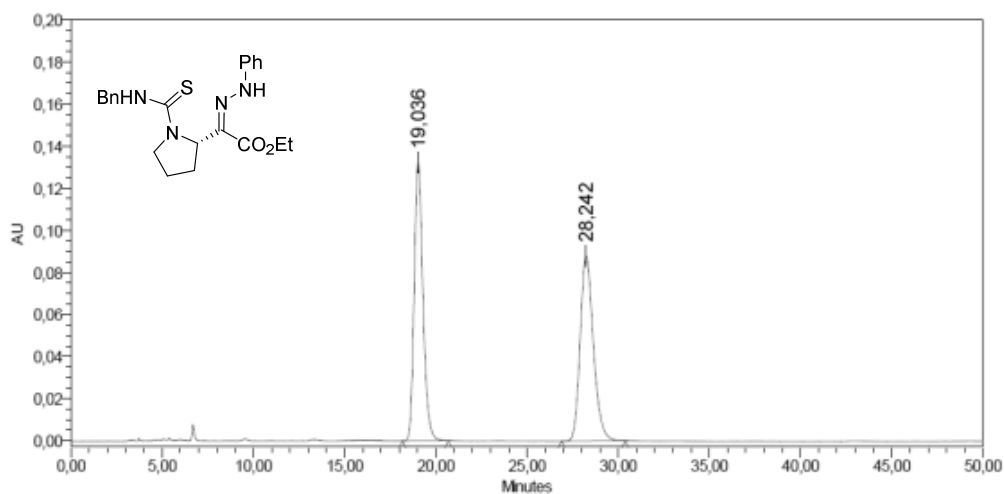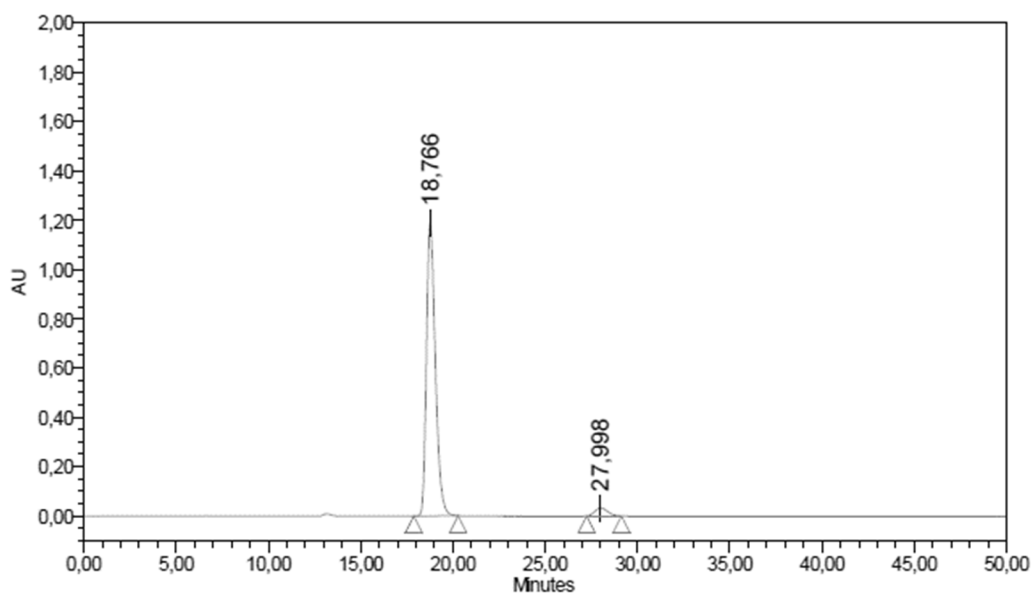

**Peak Results**

|   | RT     | Area     | Height  | % Area |
|---|--------|----------|---------|--------|
| 1 | 18,766 | 39714030 | 1190283 | 96,24  |
| 2 | 27,998 | 1550351  | 32656   | 3,76   |

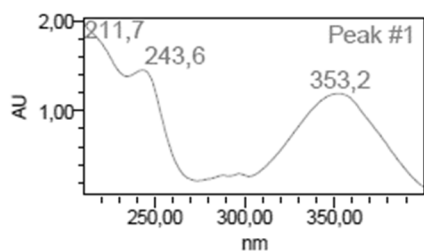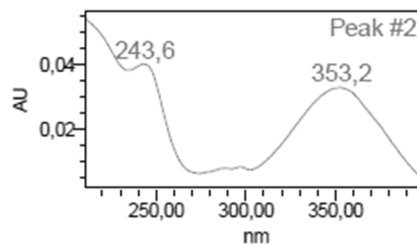

**Figure SI-70. HPLC traces of compound 4h**

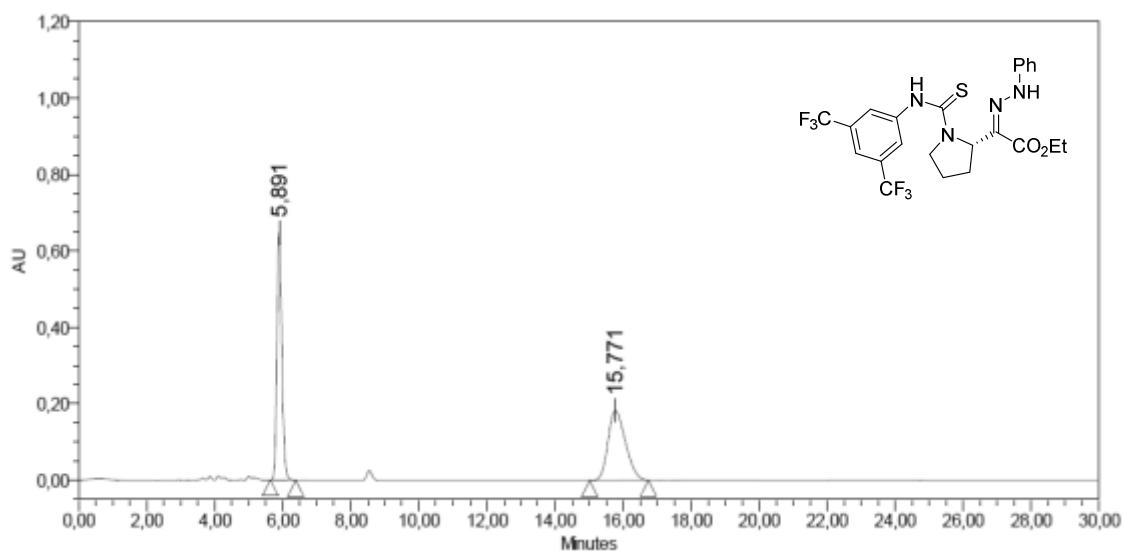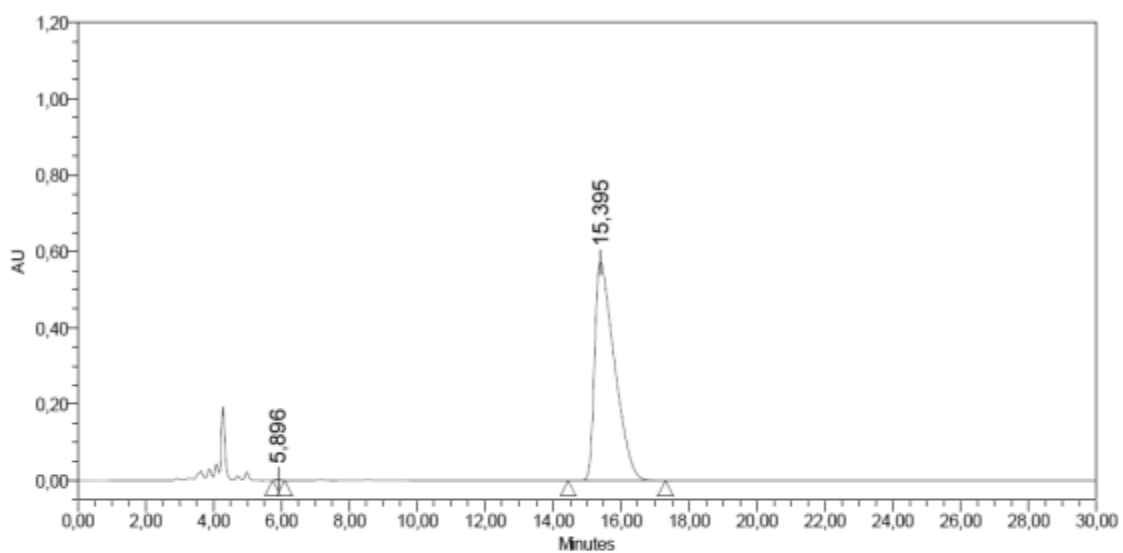

**Peak Results**

|   | RT     | Area     | Height | % Area |
|---|--------|----------|--------|--------|
| 1 | 5,896  | 22847    | 2405   | 0,10   |
| 2 | 15,395 | 23210614 | 572070 | 99,90  |

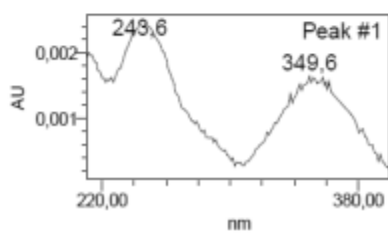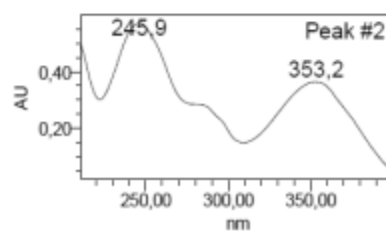

**Figure SI-71.** HPLC traces of compound **4i**

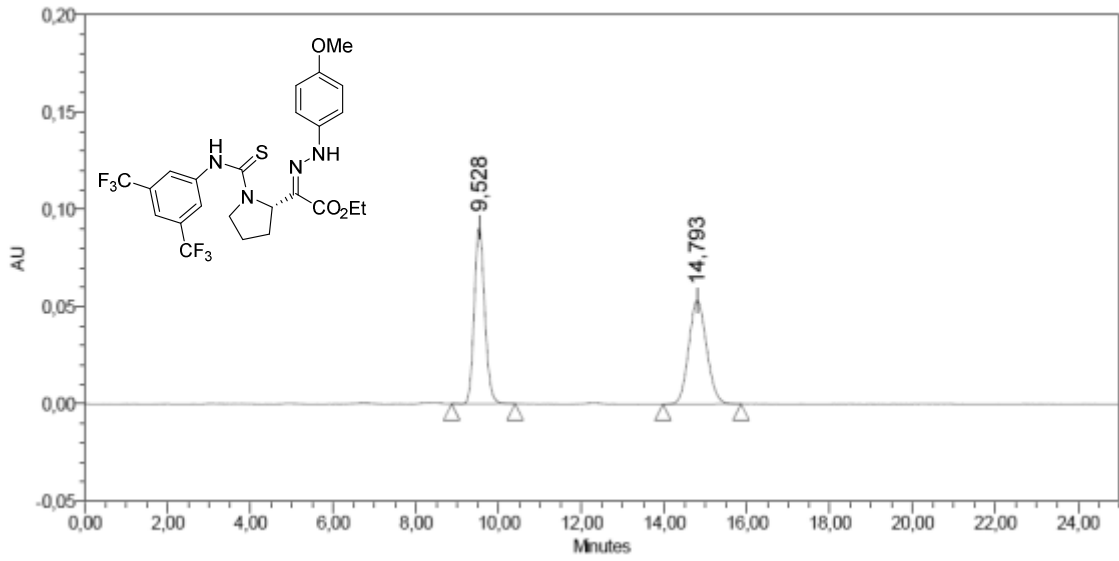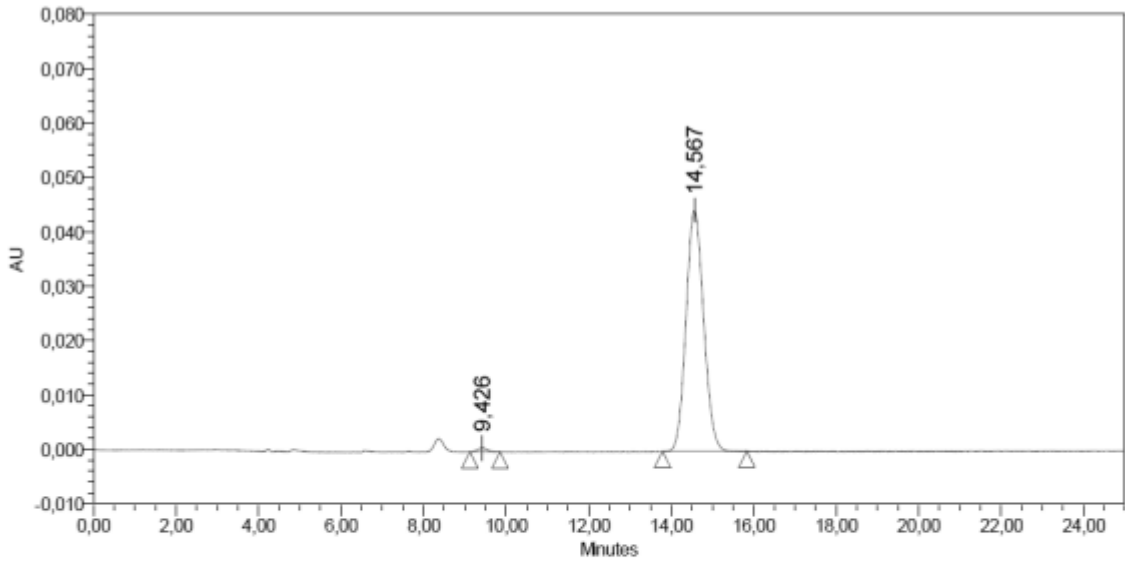

**Peak Results**

|   | RT     | Area    | Height | % Area |
|---|--------|---------|--------|--------|
| 1 | 9,426  | 11569   | 699    | 0,87   |
| 2 | 14,567 | 1313243 | 44259  | 99,13  |

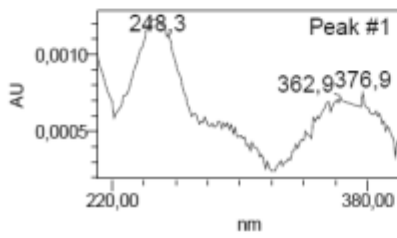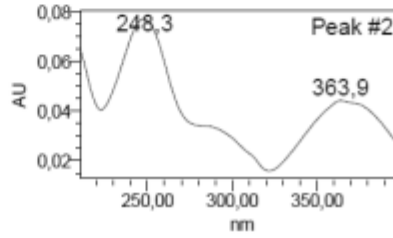

**Figure SI-72. HPLC traces of compound 4j**

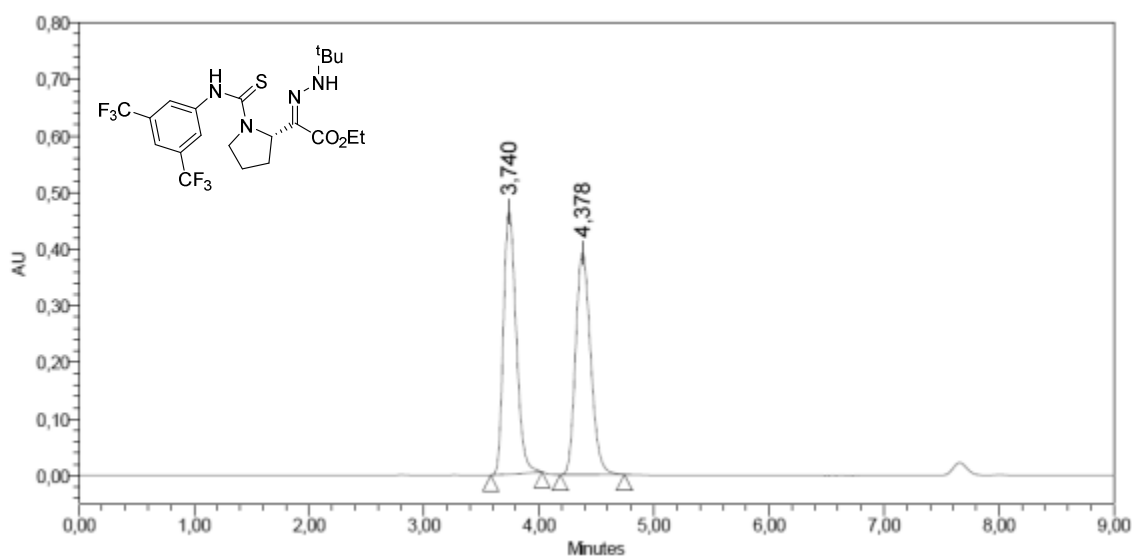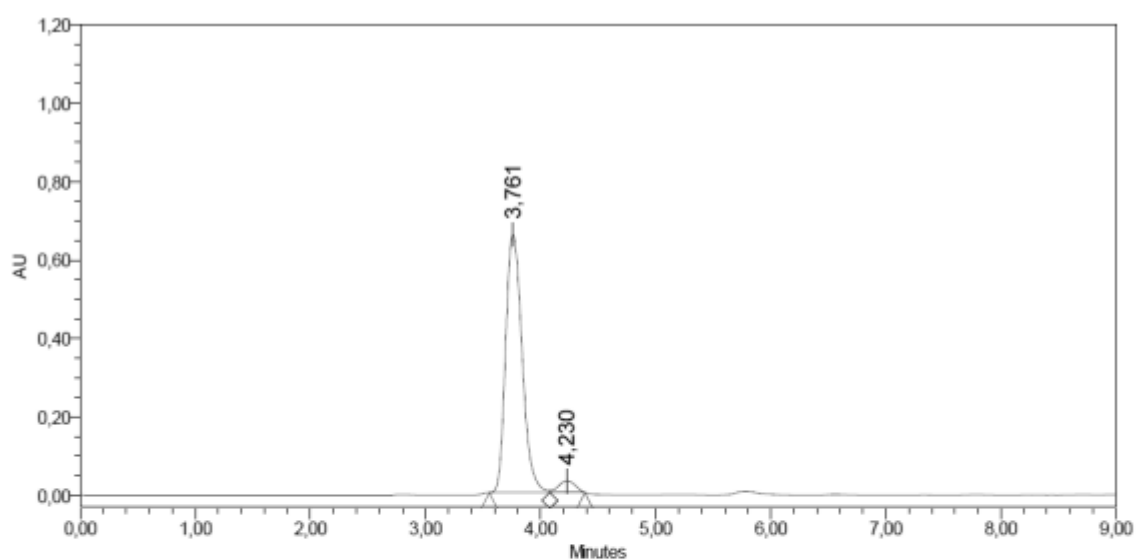

**Peak Results**

|   | RT    | Area    | Height | % Area |
|---|-------|---------|--------|--------|
| 1 | 3,761 | 6535916 | 657448 | 95,64  |
| 2 | 4,230 | 298065  | 29708  | 4,36   |

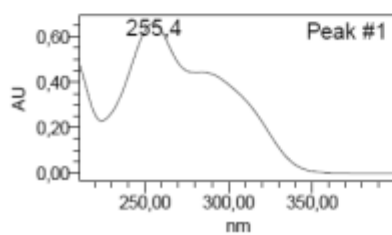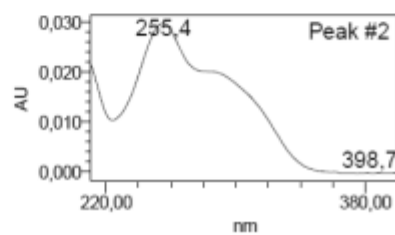

**Figure SI-73.** HPLC traces of compound **4k**

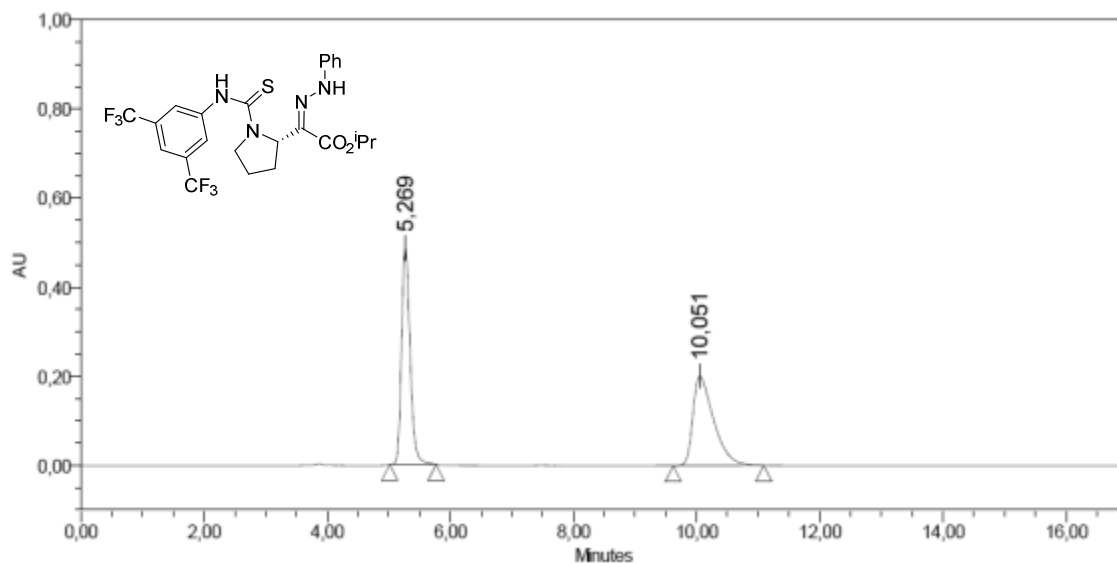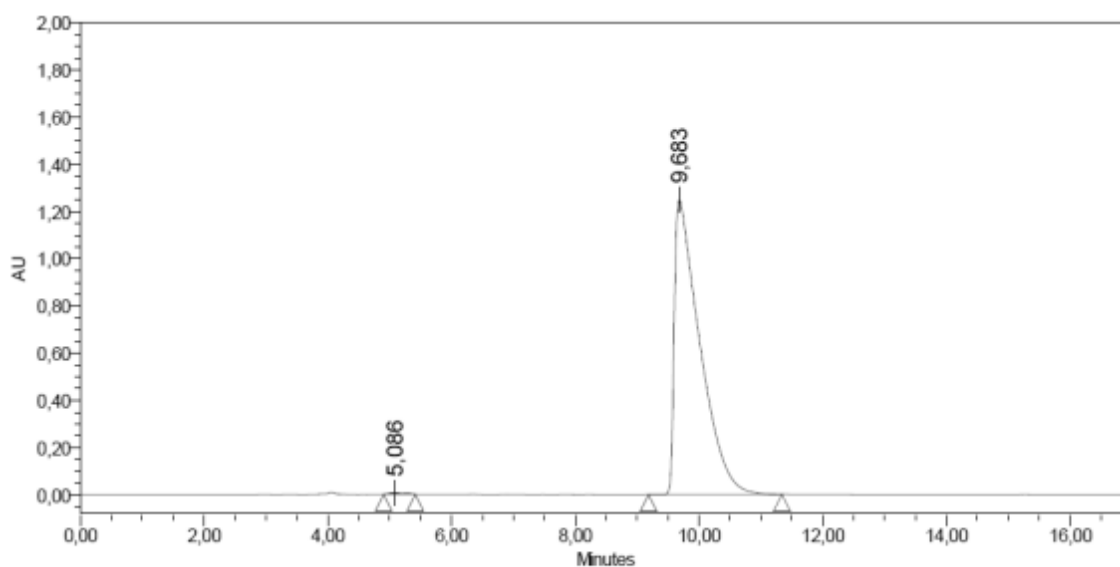

**Peak Results**

|   | RT    | Area     | Height  | % Area |
|---|-------|----------|---------|--------|
| 1 | 5,086 | 134125   | 6996    | 0,37   |
| 2 | 9,683 | 35695952 | 1249599 | 99,63  |

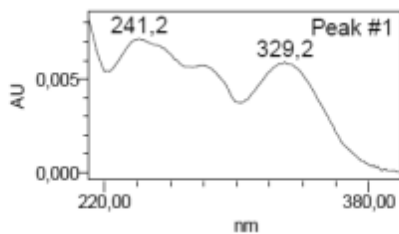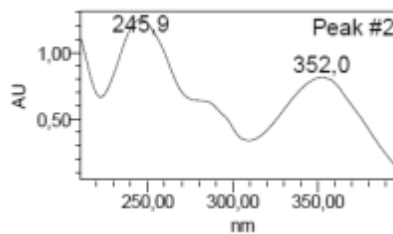

**Figure SI-74. HPLC traces of compound 4l**

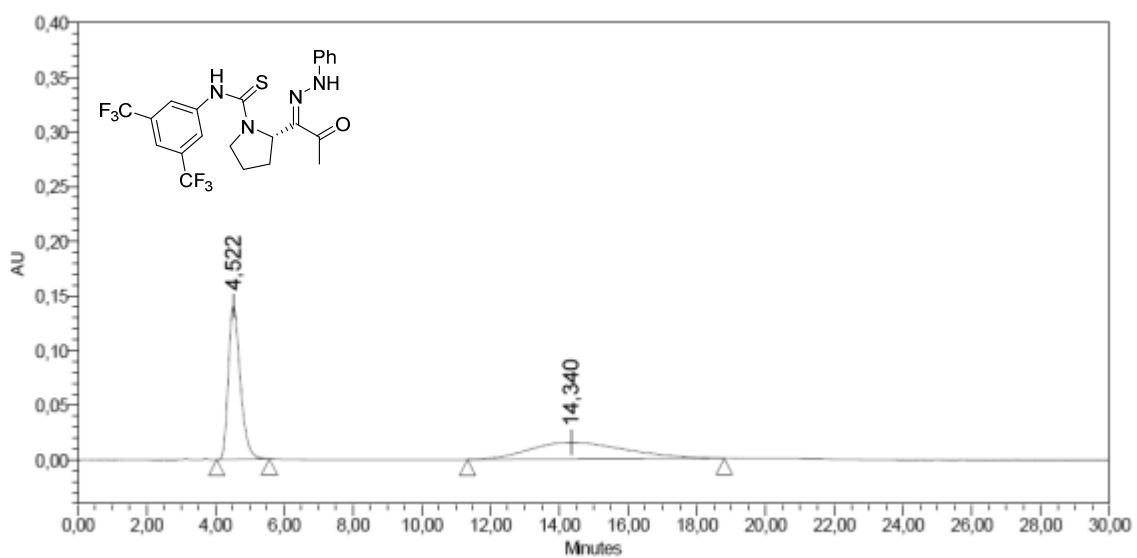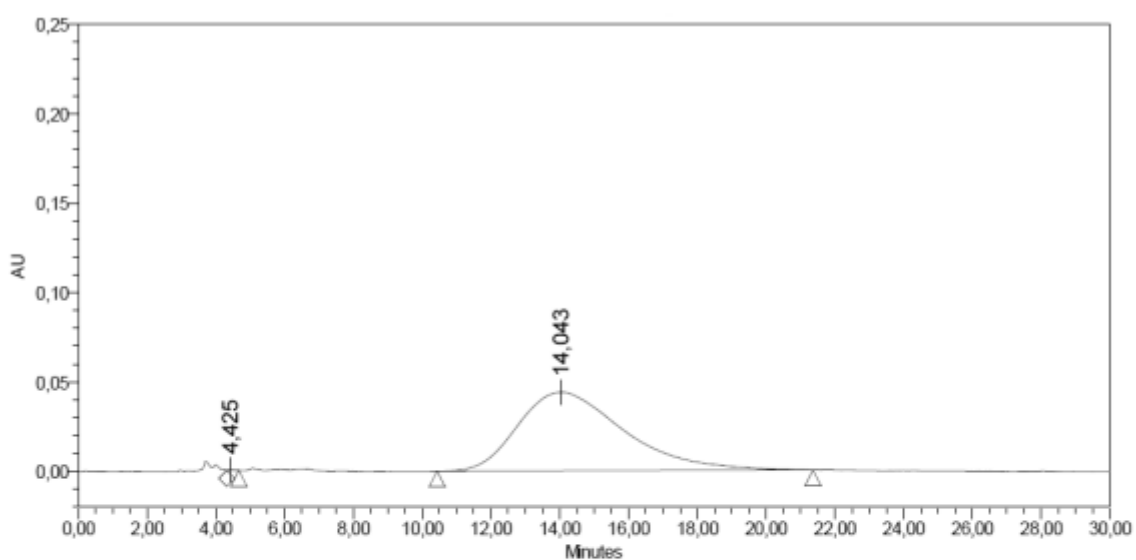

**Peak Results**

|   | RT     | Area    | Height | % Area |
|---|--------|---------|--------|--------|
| 1 | 4,425  | 2522    | 228    | 0,03   |
| 2 | 14,043 | 9385019 | 43899  | 99,97  |

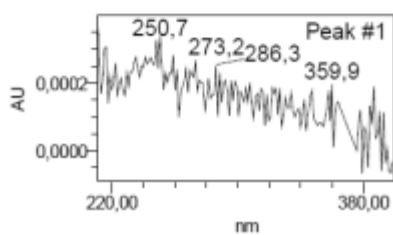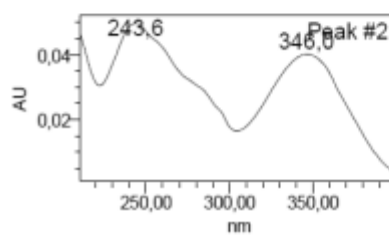

**Figure SI-75. HPLC traces of compound 4m**



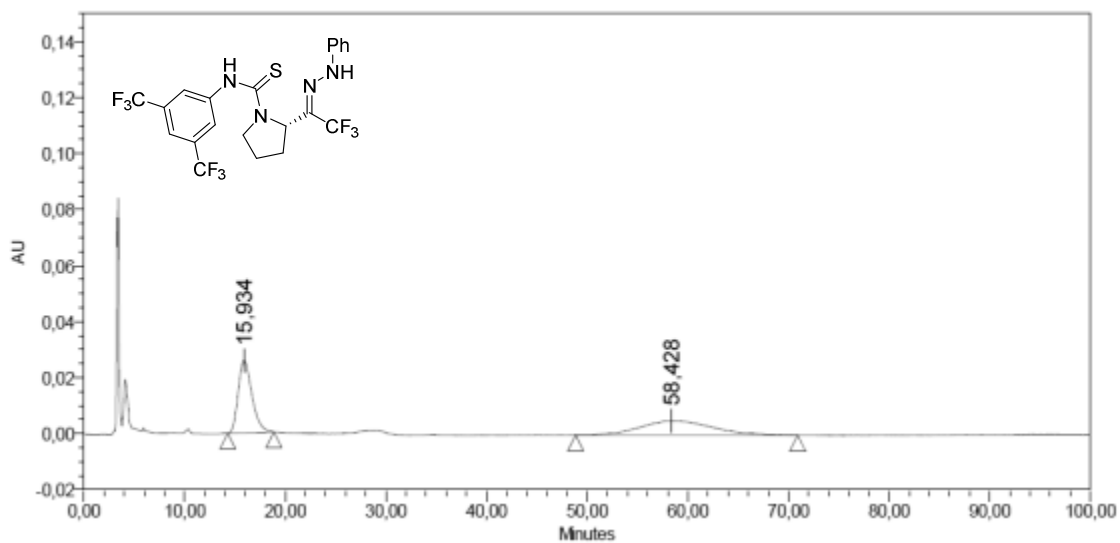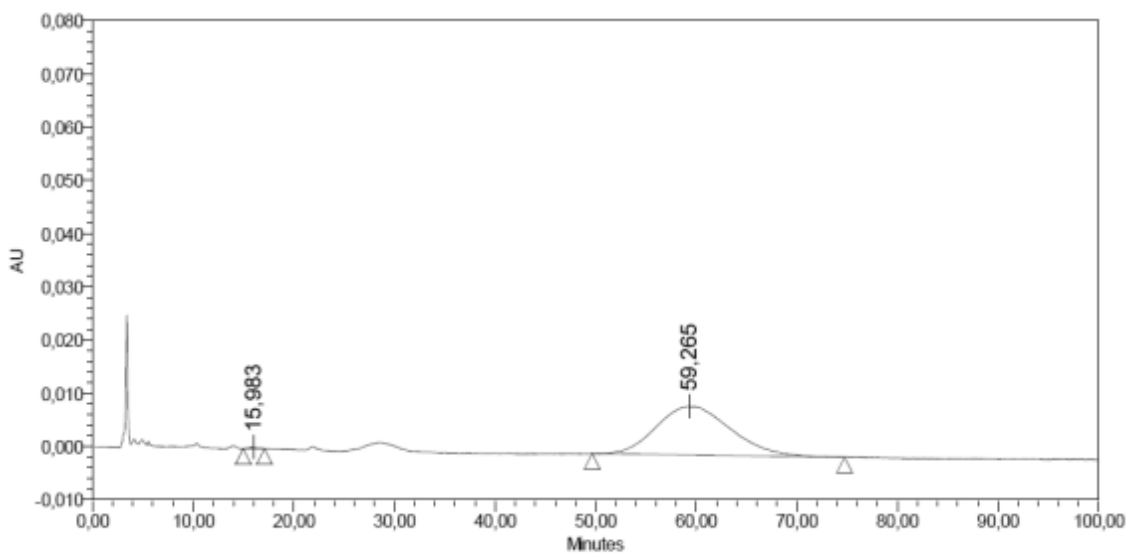

**Peak Results**

|   | RT     | Area    | Height | % Area |
|---|--------|---------|--------|--------|
| 1 | 15,983 | 16770   | 283    | 0,36   |
| 2 | 59,265 | 4664337 | 9161   | 99,64  |

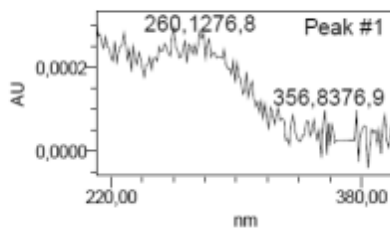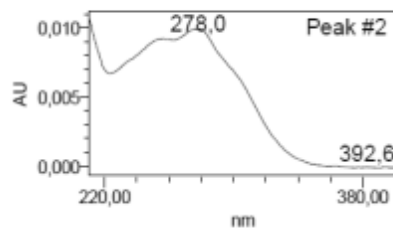

**Figure SI-76. HPLC traces of compound 4n**

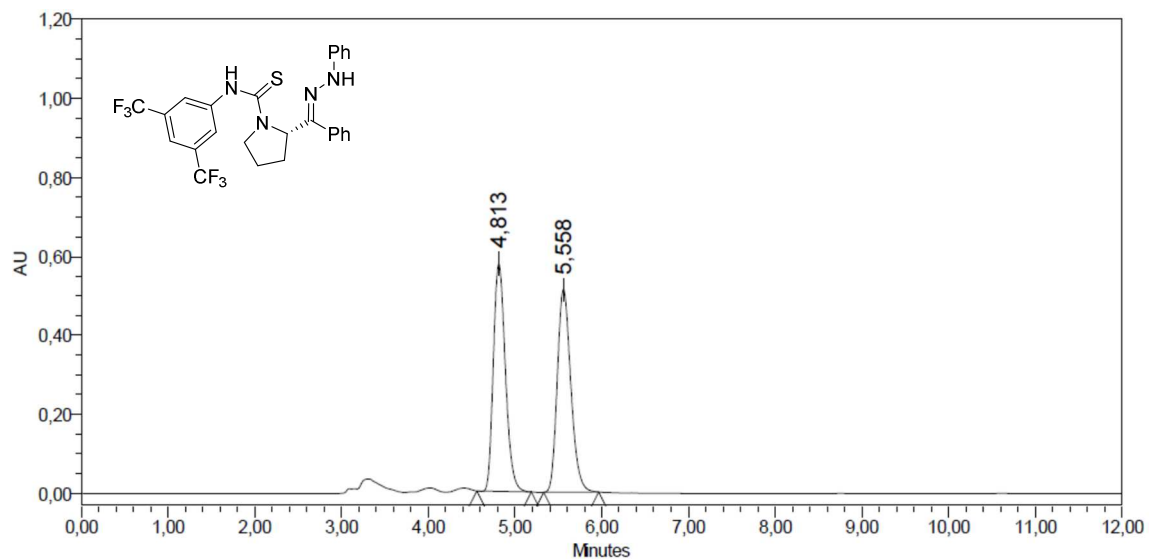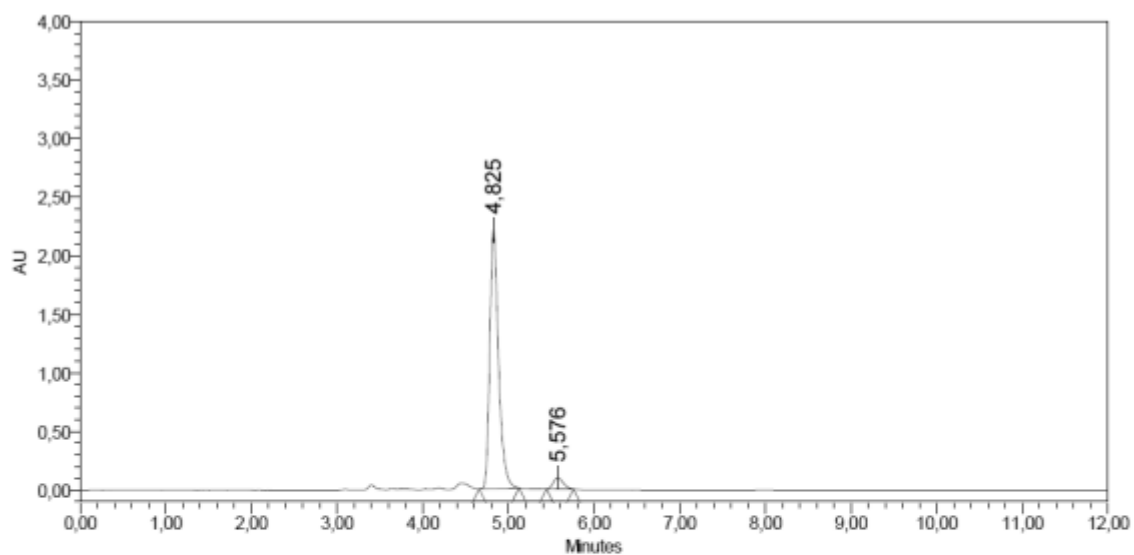

**Peak Results**

|   | RT    | Area     | Height  | % Area |
|---|-------|----------|---------|--------|
| 1 | 4,825 | 15633380 | 2212083 | 95,25  |
| 2 | 5,576 | 779737   | 97311   | 4,75   |

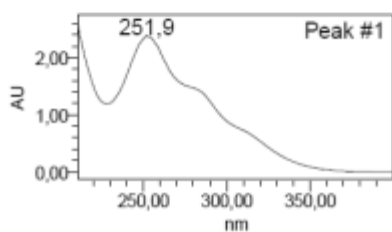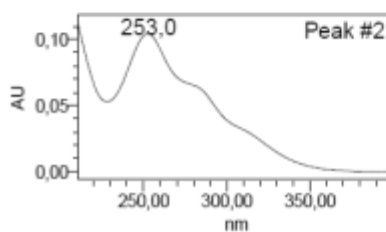

**Figure SI-77. HPLC traces of compound 4o**

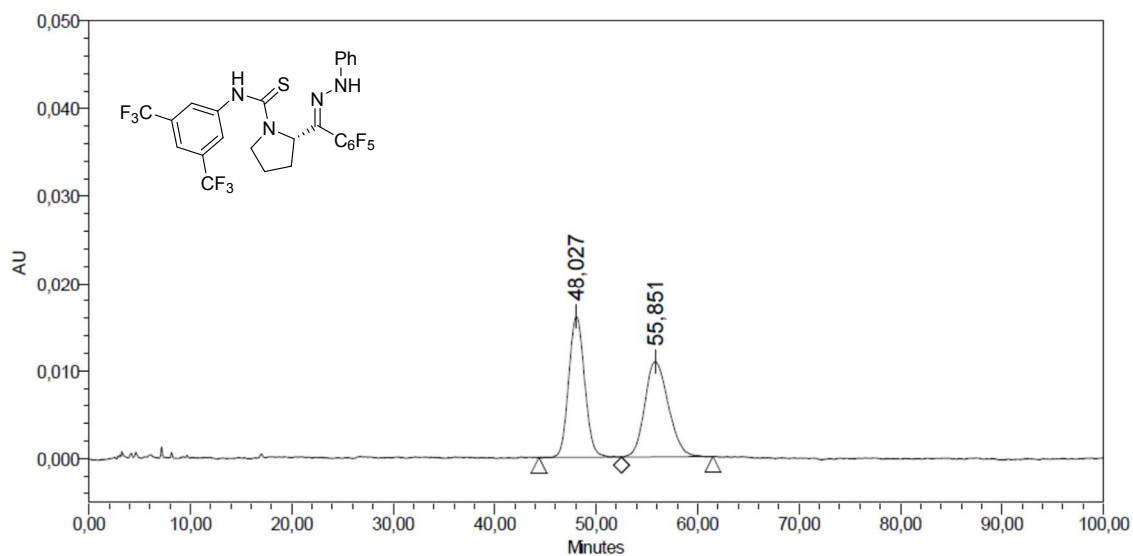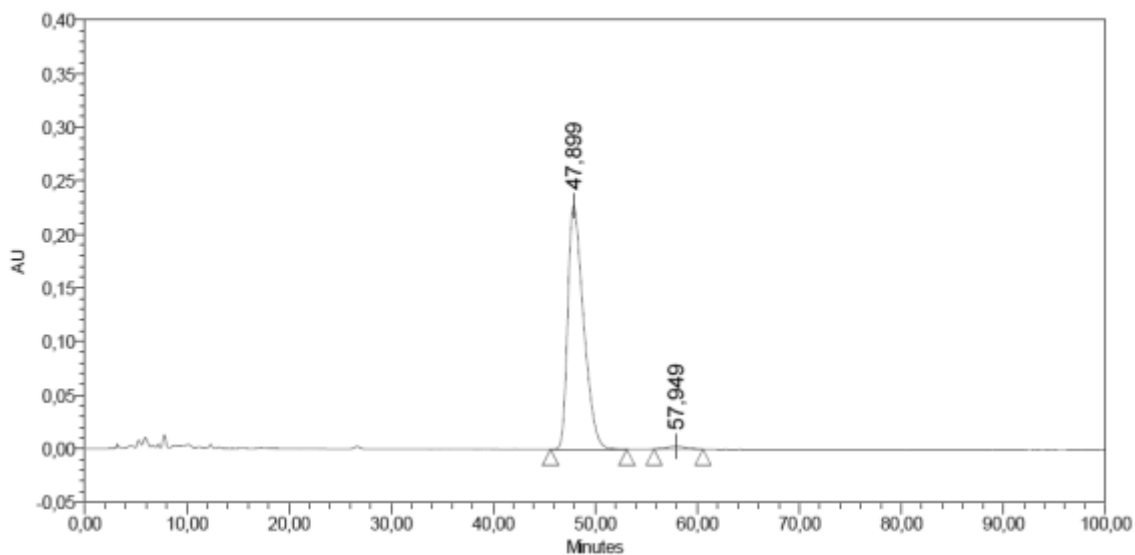

Peak Results

|   | RT     | Area     | Height | % Area |
|---|--------|----------|--------|--------|
| 1 | 47,899 | 24421675 | 227126 | 98,57  |
| 2 | 57,949 | 354859   | 2454   | 1,43   |

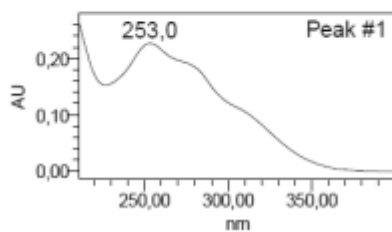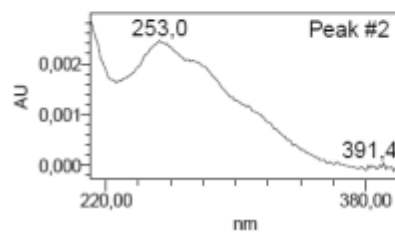

Figure SI-78. HPLC traces of compound 4p

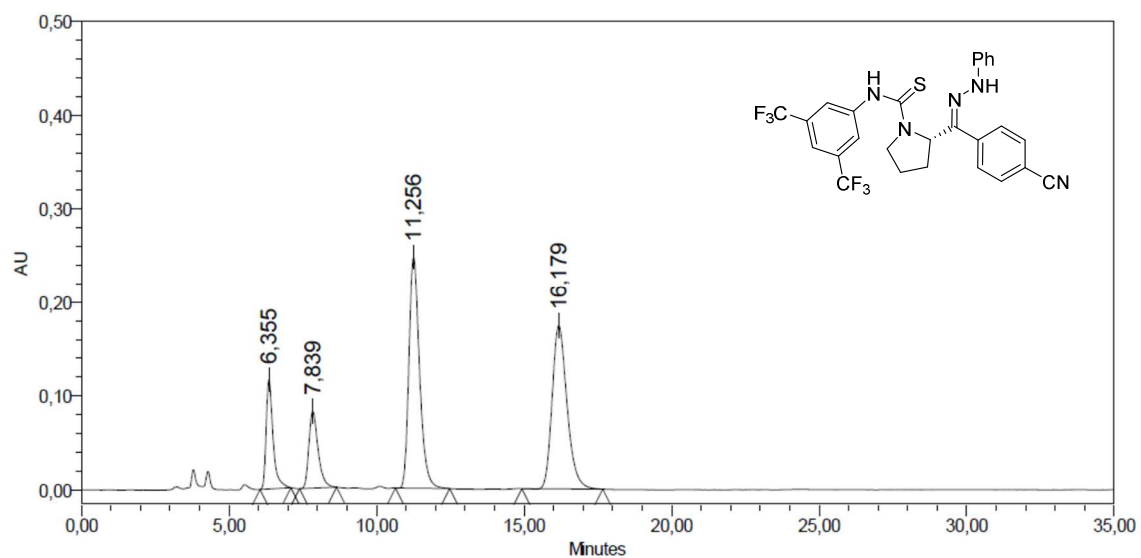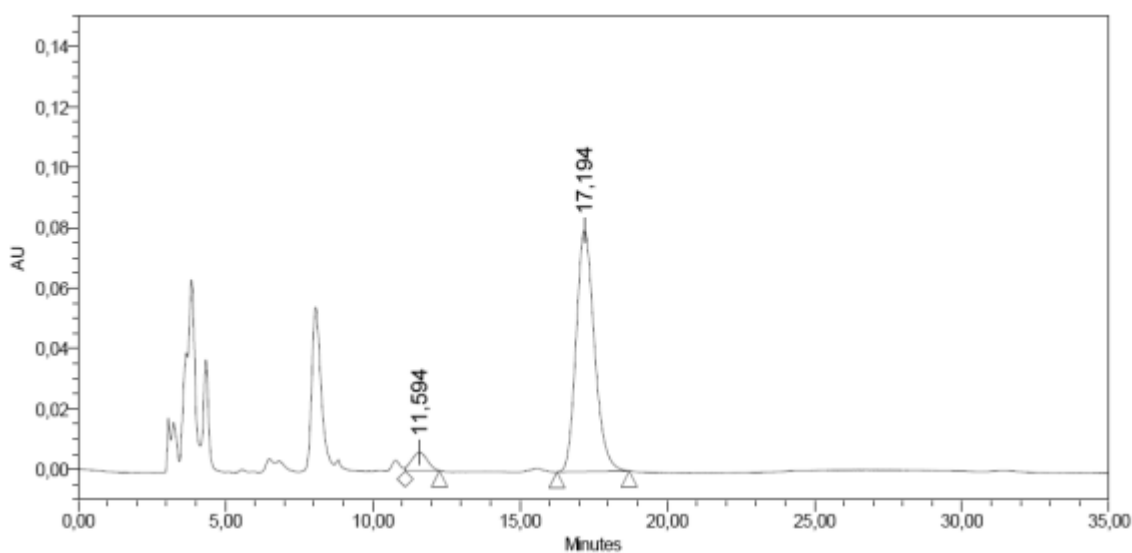

**Peak Results**

|   | RT     | Area    | Height | % Area |
|---|--------|---------|--------|--------|
| 1 | 11,594 | 226725  | 6186   | 6,16   |
| 2 | 17,194 | 3455871 | 79882  | 93,84  |

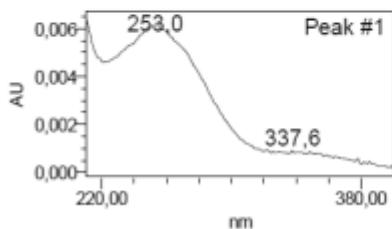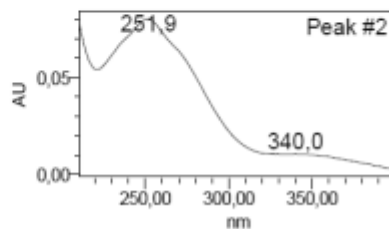

**Figure SI-79.** HPLC traces of compound **4q**

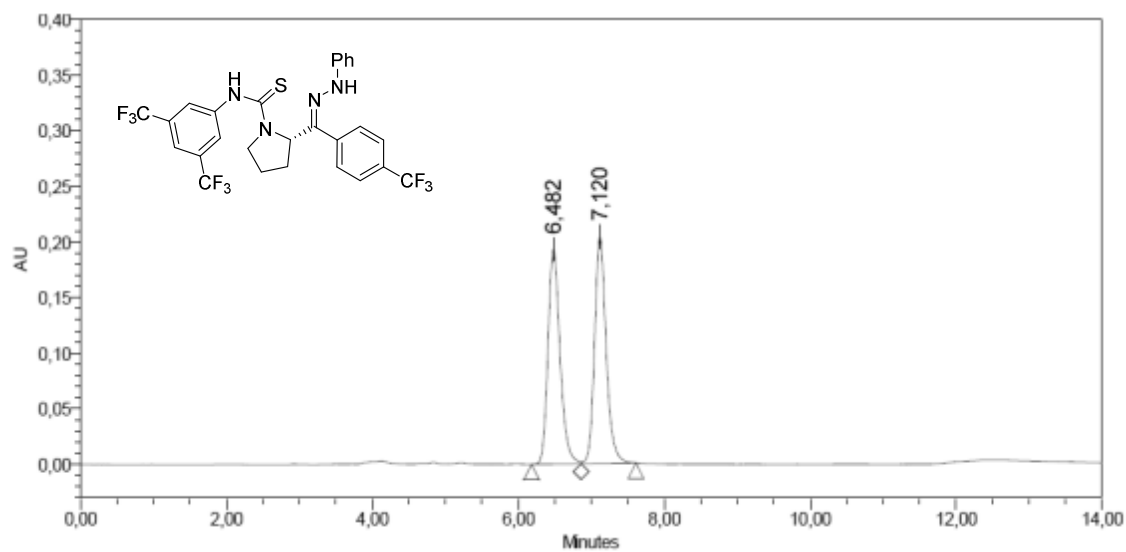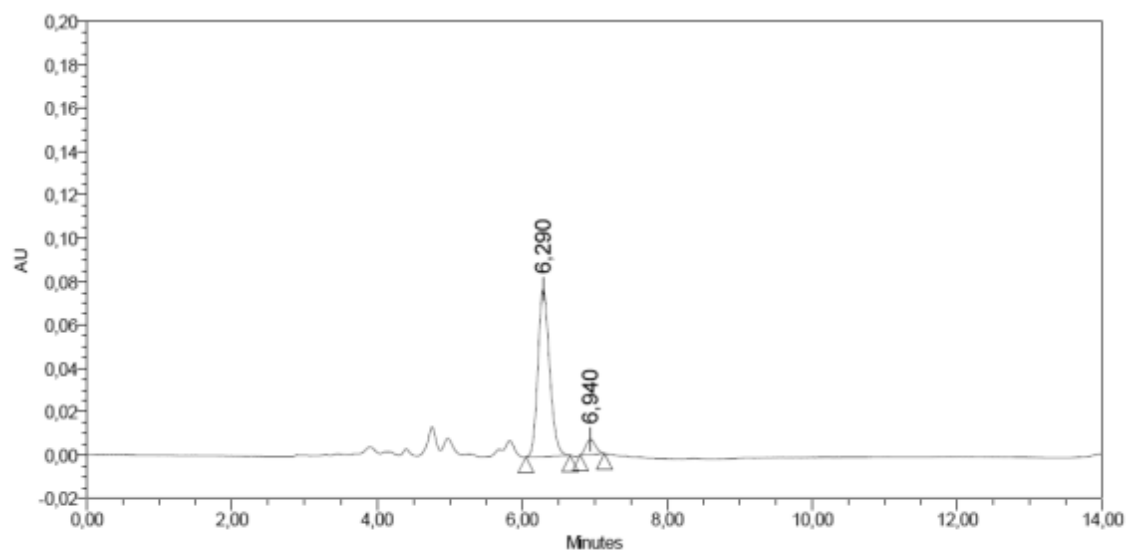

**Peak Results**

|   | RT    | Area   | Height | % Area |
|---|-------|--------|--------|--------|
| 1 | 6,290 | 866498 | 77159  | 93,14  |
| 2 | 6,940 | 63852  | 6938   | 6,86   |

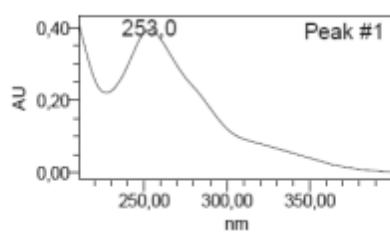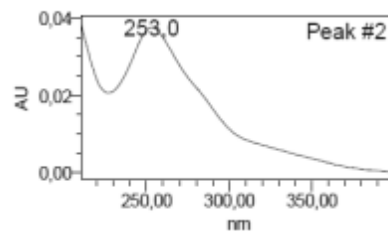

**Figure SI-80.** HPLC traces of compound **4r**

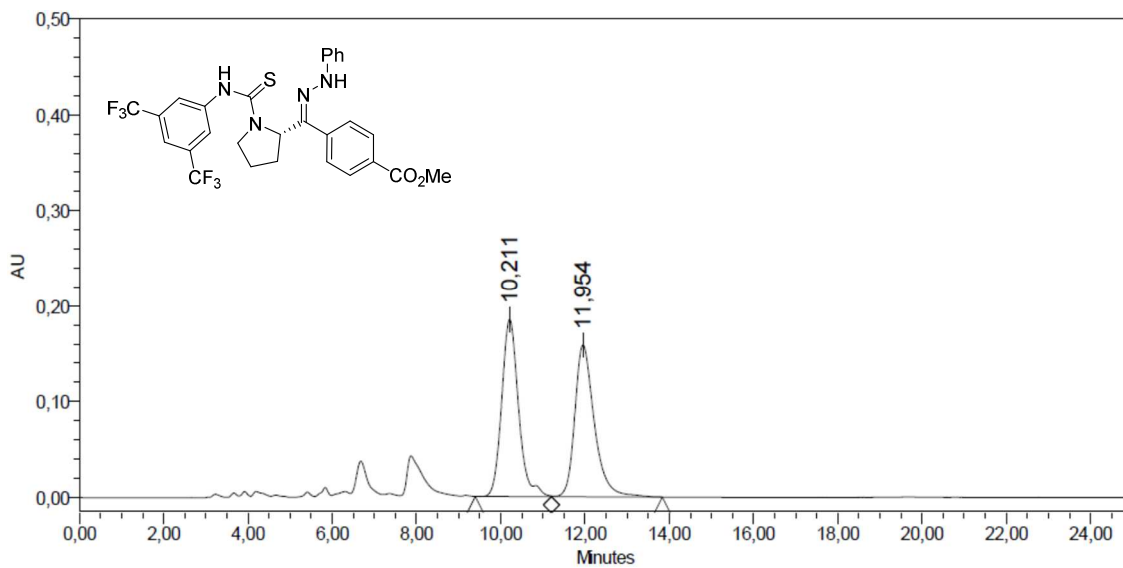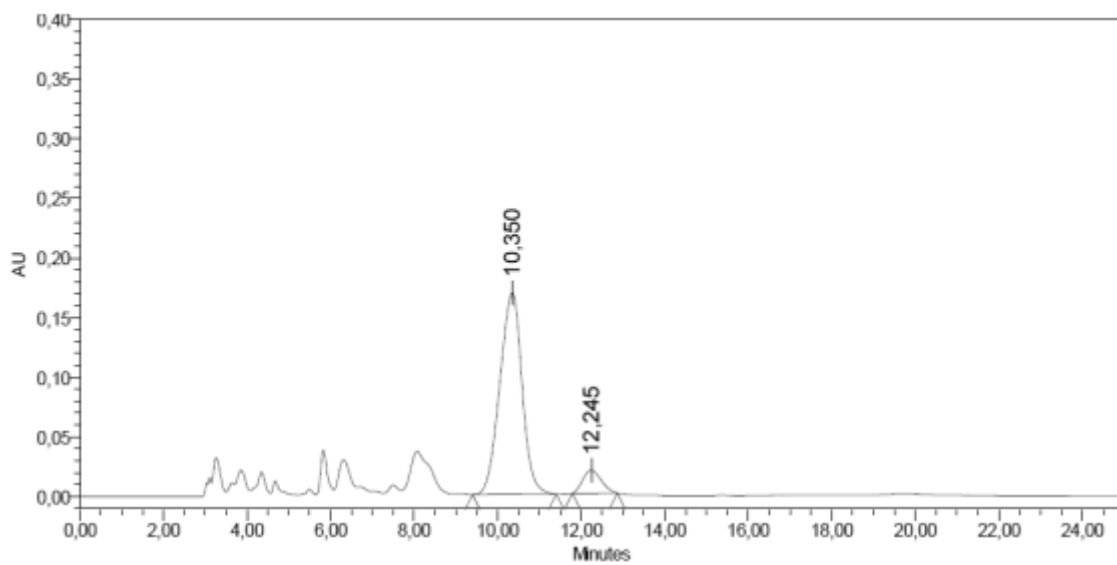

**Peak Results**

|   | RT     | Area    | Height | % Area |
|---|--------|---------|--------|--------|
| 1 | 10,350 | 6267059 | 169203 | 91,36  |
| 2 | 12,245 | 592725  | 19365  | 8,64   |

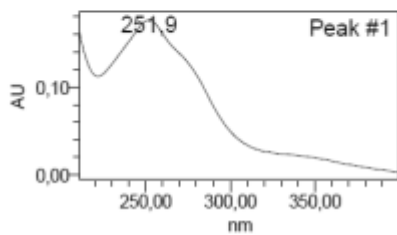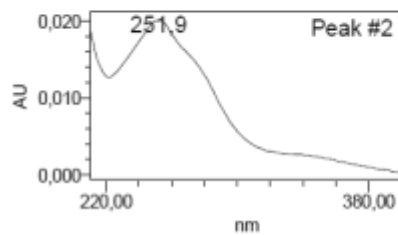

**Figure SI-81. HPLC traces of compound 4s**

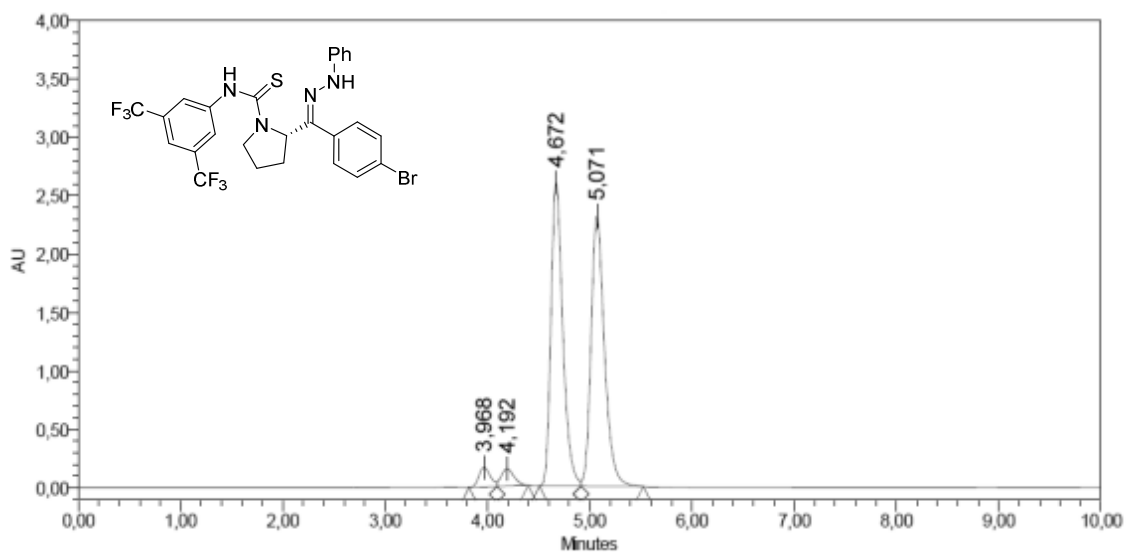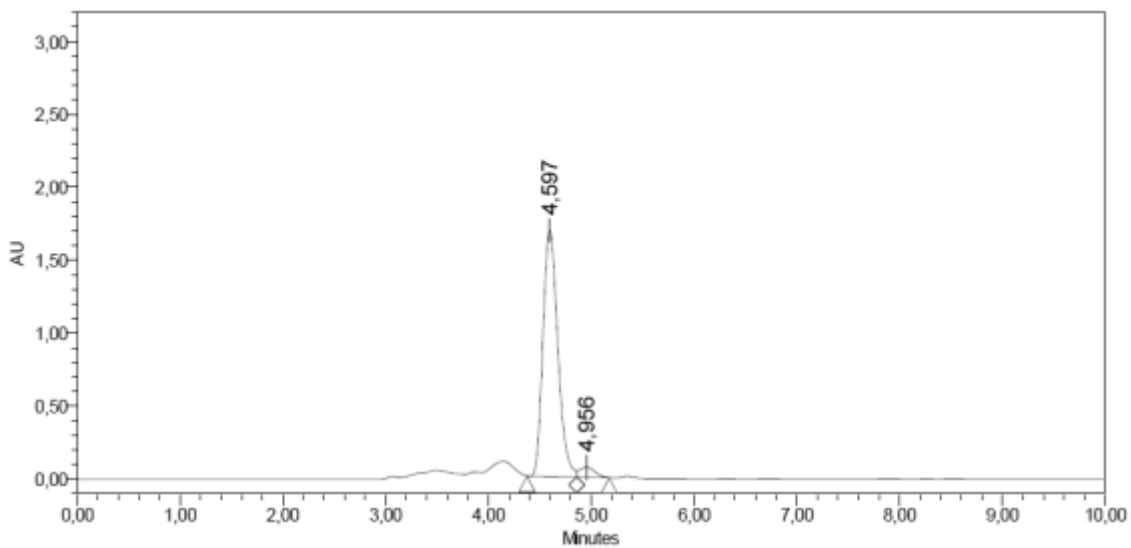

**Peak Results**

|   | RT    | Area     | Height  | % Area |
|---|-------|----------|---------|--------|
| 1 | 4,597 | 16912977 | 1687122 | 95,97  |
| 2 | 4,956 | 710811   | 67405   | 4,03   |

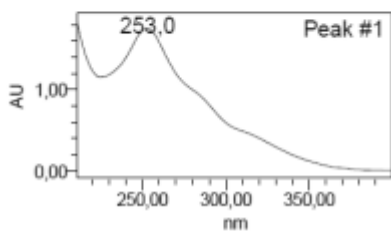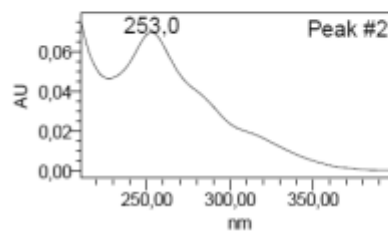

**Figure SI-82.** HPLC traces of compound **4t**

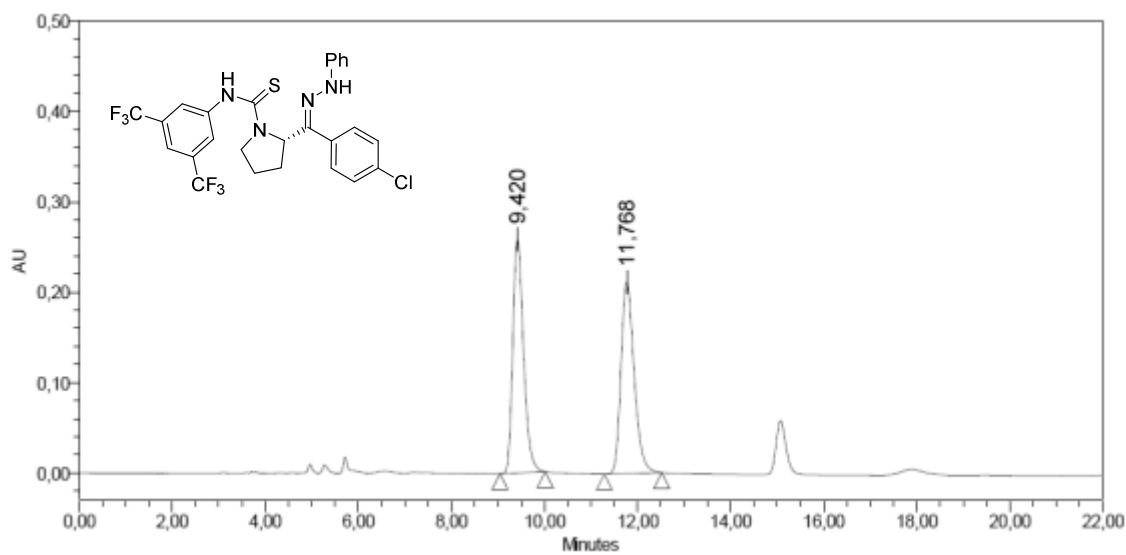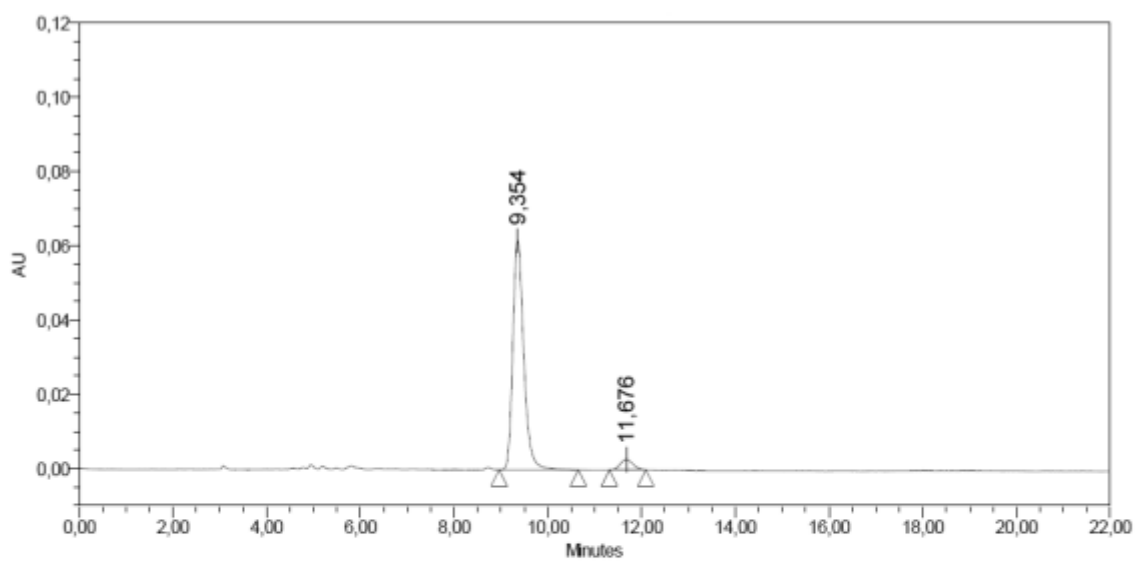

**Peak Results**

|   | RT     | Area    | Height | % Area |
|---|--------|---------|--------|--------|
| 1 | 9,354  | 1002201 | 61783  | 94,95  |
| 2 | 11,676 | 53338   | 2820   | 5,05   |

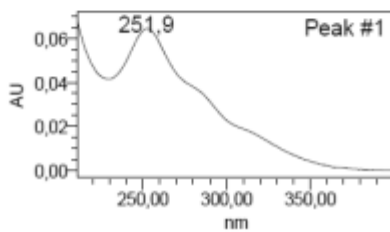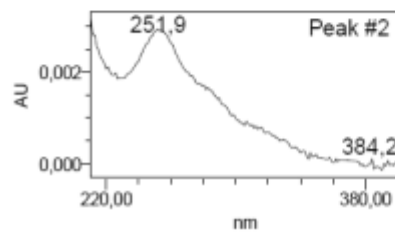

**Figure SI-83. HPLC traces of compound 4u**



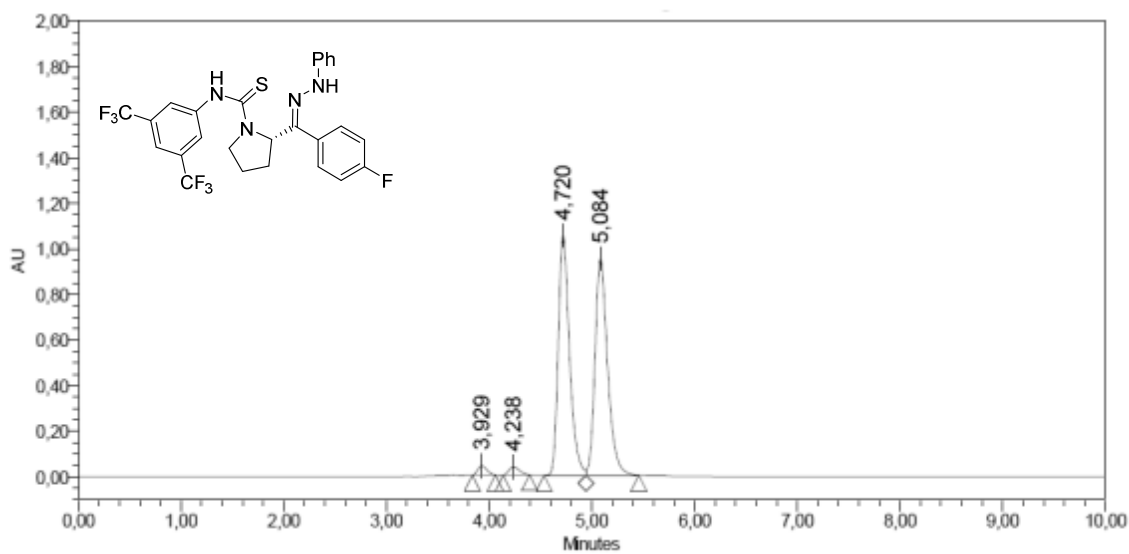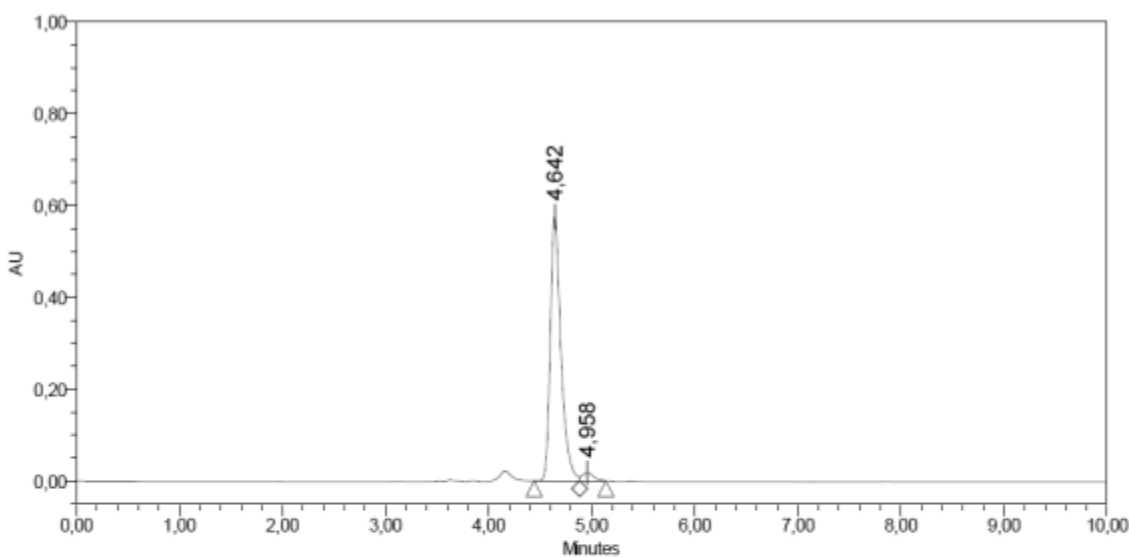

**Peak Results**

|   | RT    | Area    | Height | % Area |
|---|-------|---------|--------|--------|
| 1 | 4,642 | 4126235 | 576195 | 96,82  |
| 2 | 4,958 | 135313  | 17570  | 3,18   |

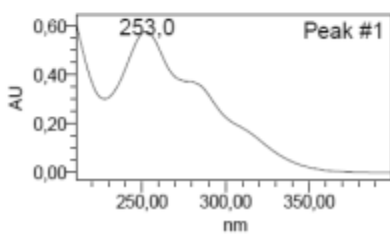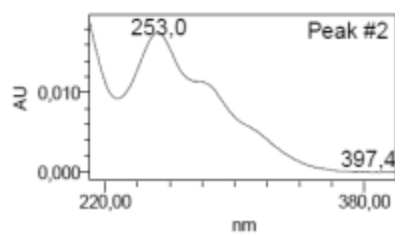

**Figure SI-84.** HPLC traces of compound 4v

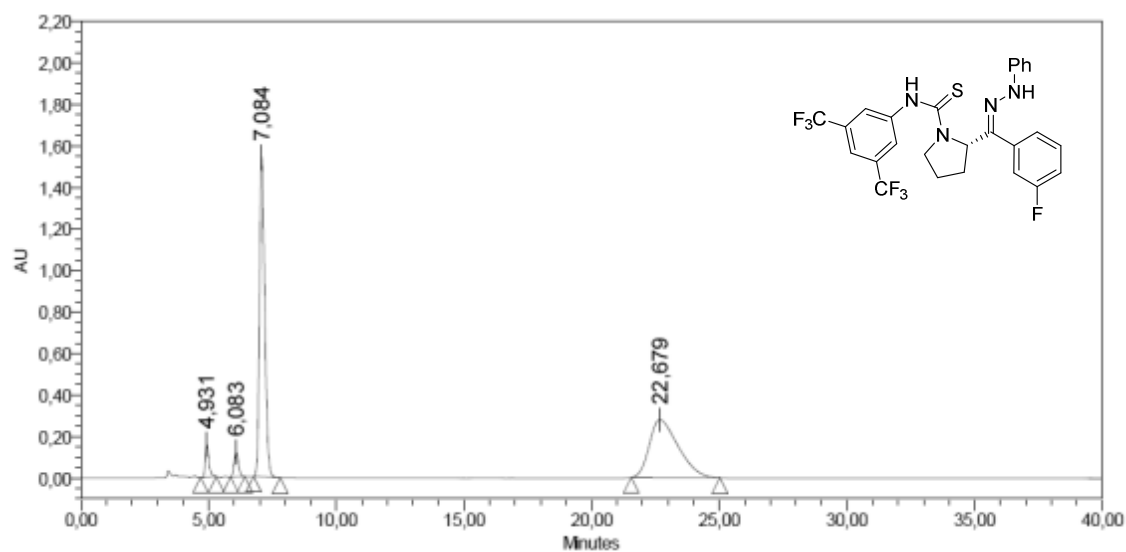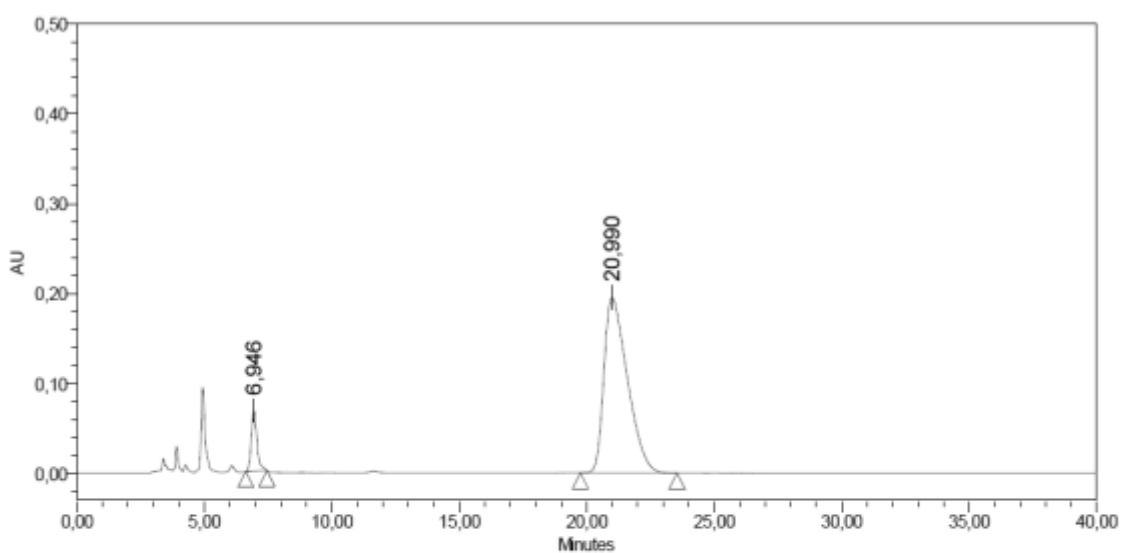

**Peak Results**

|   | RT     | Area     | Height | % Area |
|---|--------|----------|--------|--------|
| 1 | 6,946  | 1054068  | 67571  | 7,79   |
| 2 | 20,990 | 12476842 | 195009 | 92,21  |

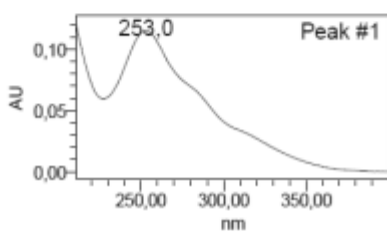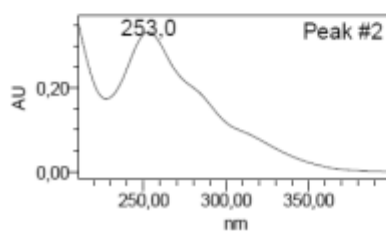

**Figure SI-85. HPLC traces of compound 4w**

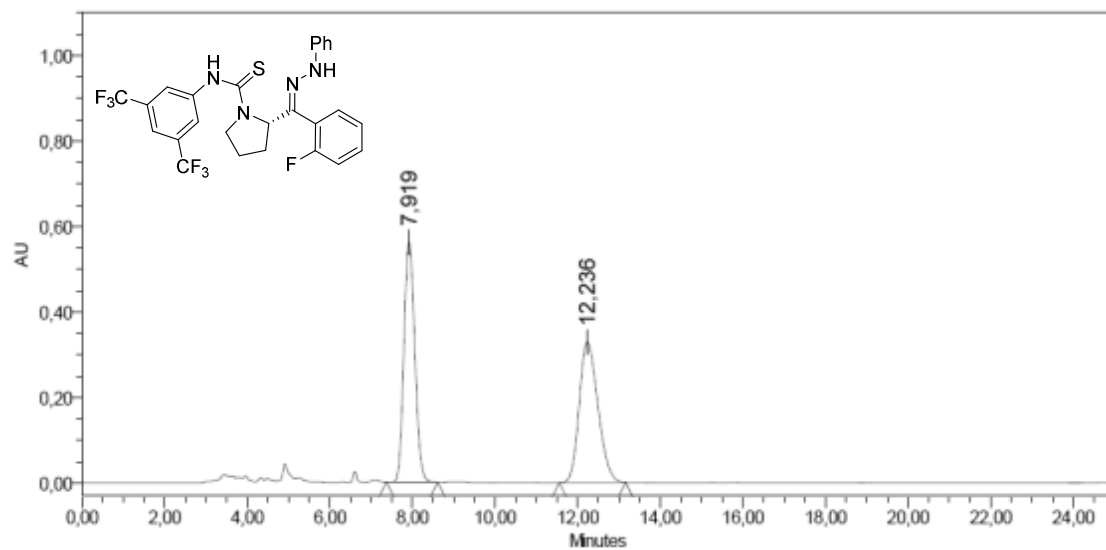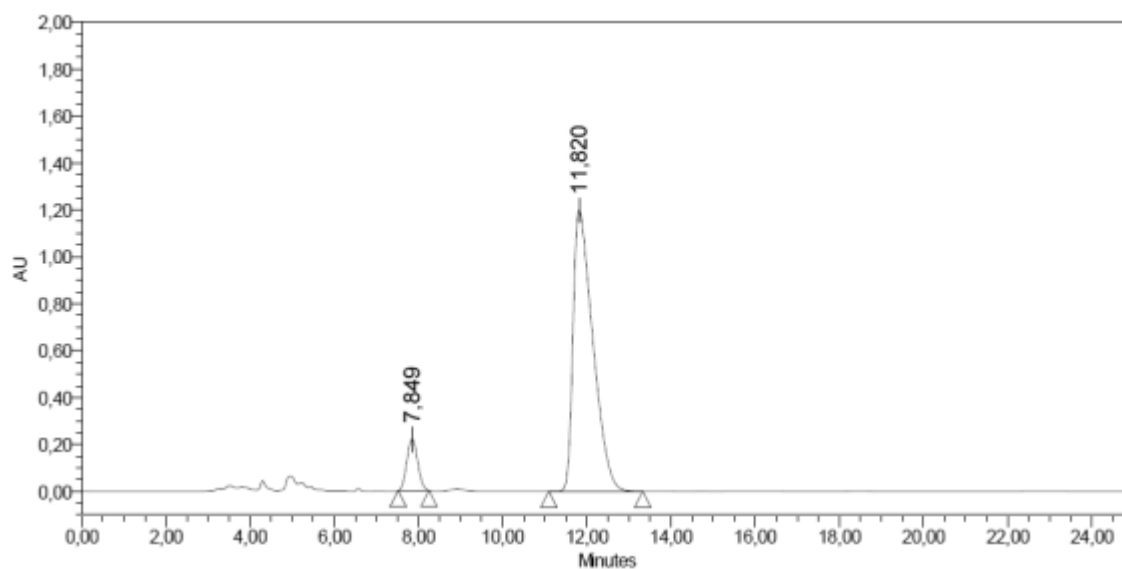

**Peak Results**

|   | RT     | Area     | Height  | % Area |
|---|--------|----------|---------|--------|
| 1 | 7,849  | 3913407  | 218472  | 9,09   |
| 2 | 11,820 | 39142274 | 1198064 | 90,91  |

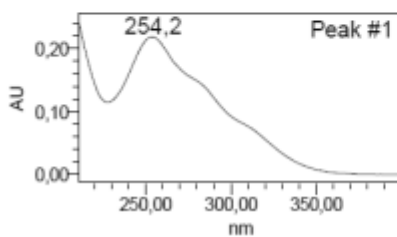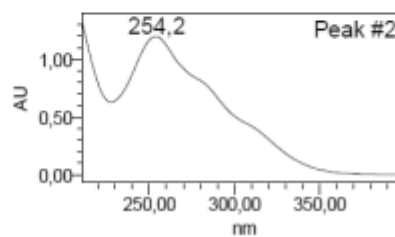

**Figure SI-86.** HPLC traces of compound 4x

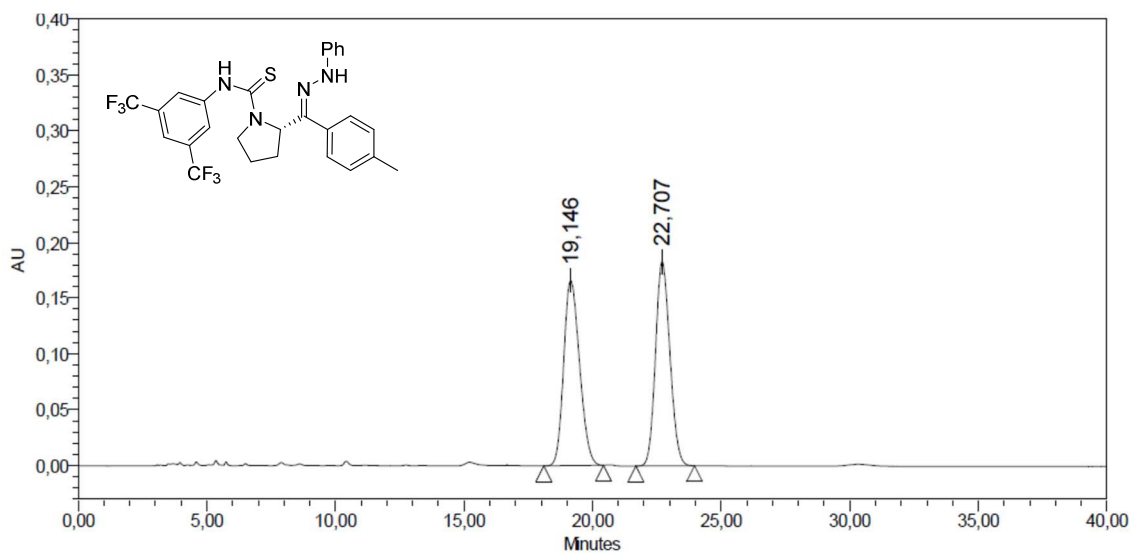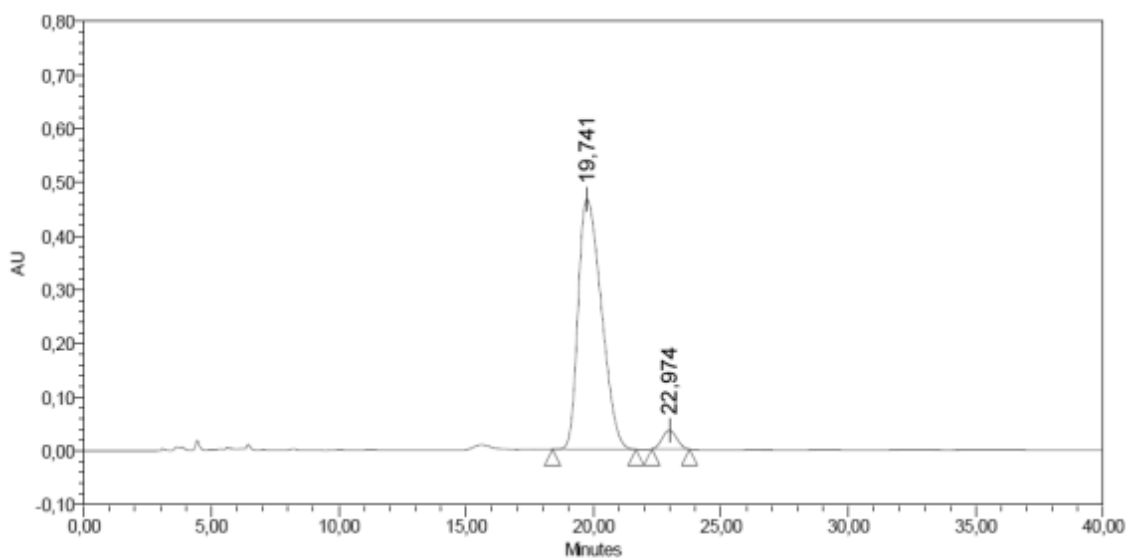

**Peak Results**

|   | RT     | Area     | Height | % Area |
|---|--------|----------|--------|--------|
| 1 | 19,741 | 29578742 | 465790 | 95,45  |
| 2 | 22,974 | 1411372  | 35383  | 4,55   |

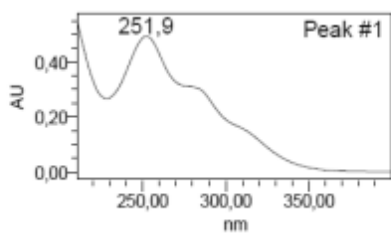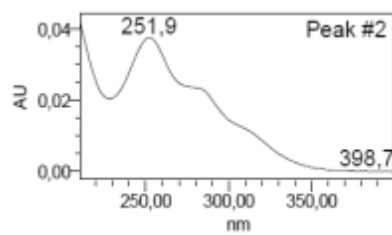

**Figure SI-87. HPLC traces of compound 4y**

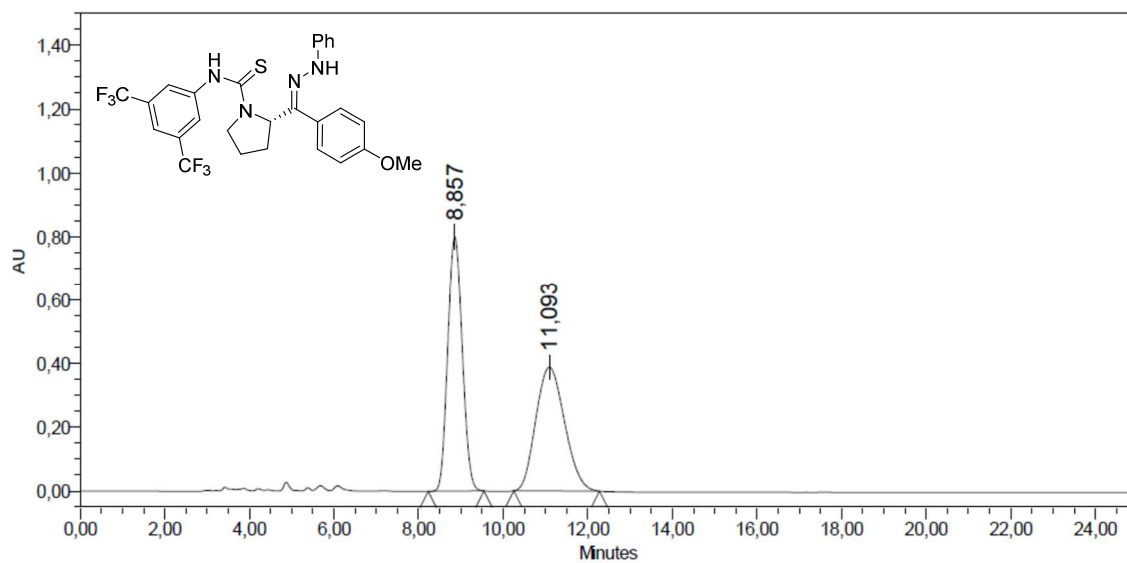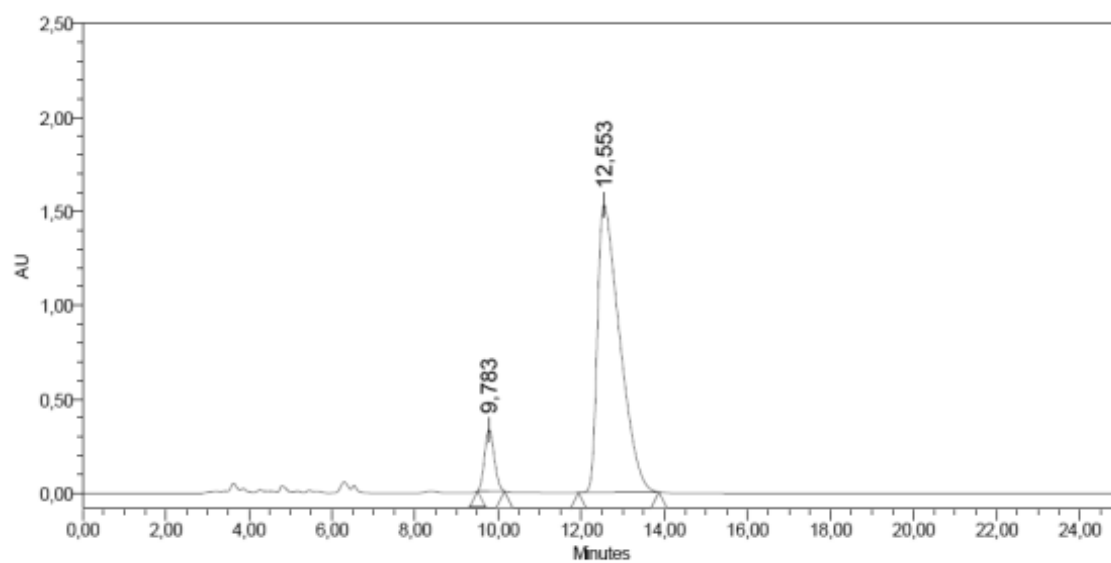

**Peak Results**

|   | RT     | Area     | Height  | % Area |
|---|--------|----------|---------|--------|
| 1 | 9,783  | 5326867  | 328323  | 8,53   |
| 2 | 12,553 | 57090742 | 1531667 | 91,47  |

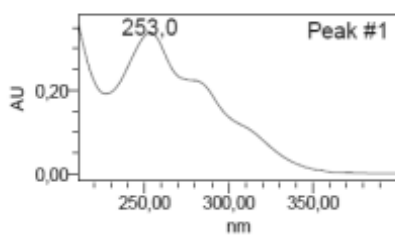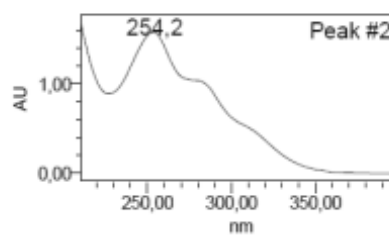

**Figure SI-88.** HPLC traces of compound 4z

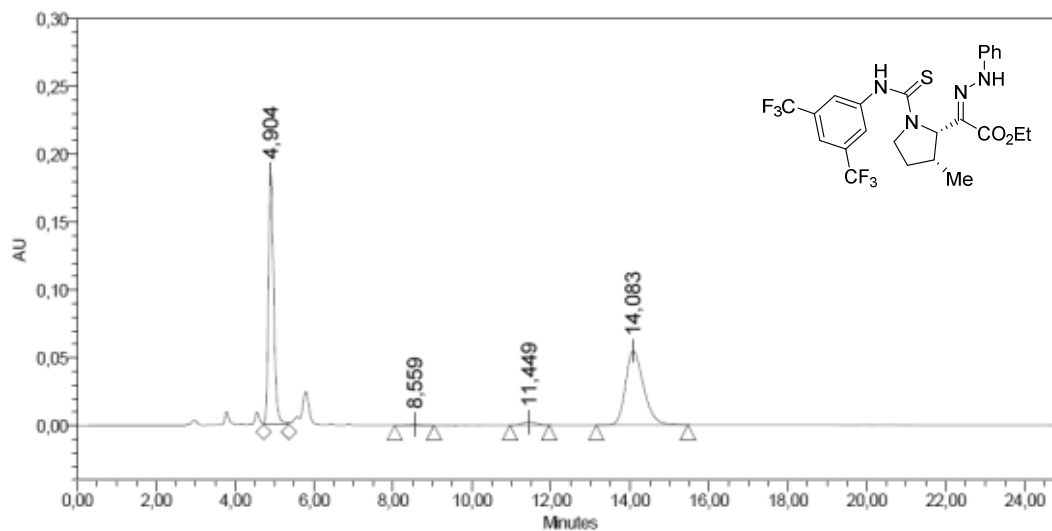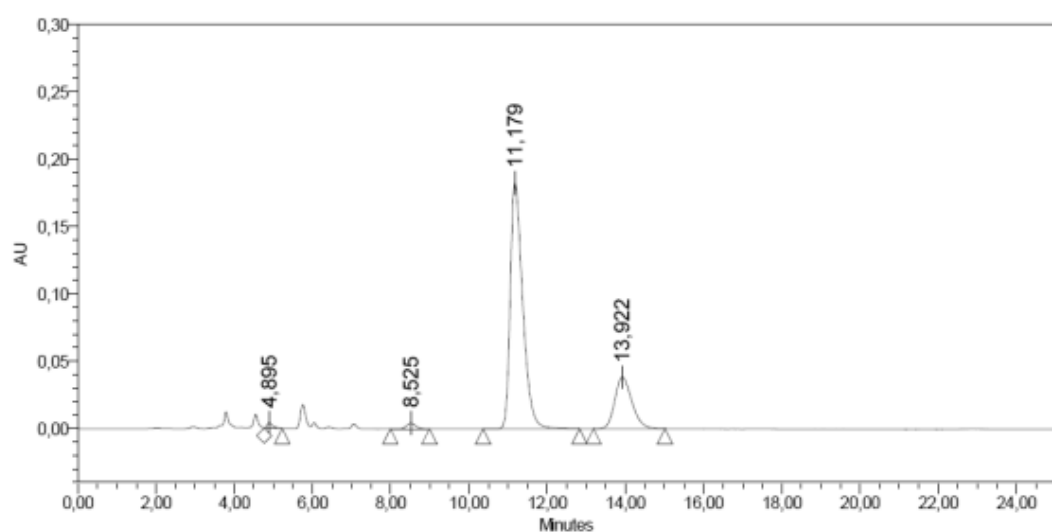

**Peak Results**

|   | RT     | Area    | Height | % Area |
|---|--------|---------|--------|--------|
| 1 | 4,895  | 41589   | 4106   | 0,79   |
| 2 | 8,525  | 65461   | 4226   | 1,24   |
| 3 | 11,179 | 4025307 | 182616 | 76,08  |
| 4 | 13,922 | 1158358 | 38262  | 21,89  |

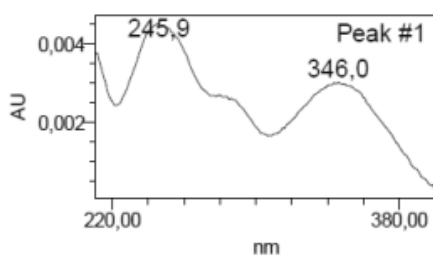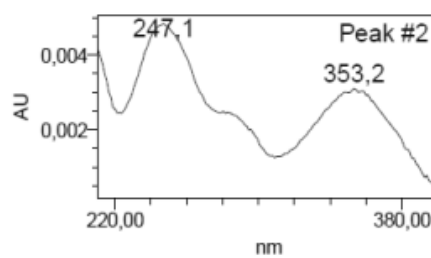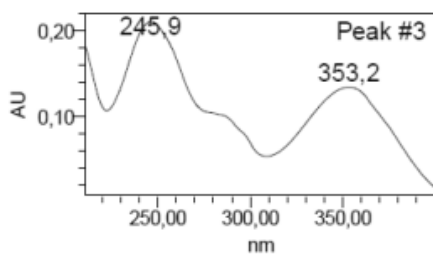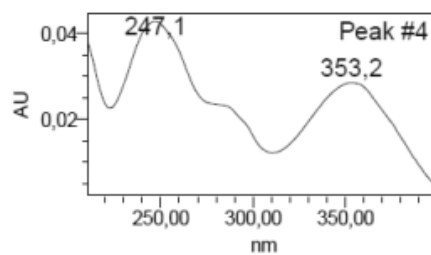

**Figure SI-89. HPLC traces of compound 6a**

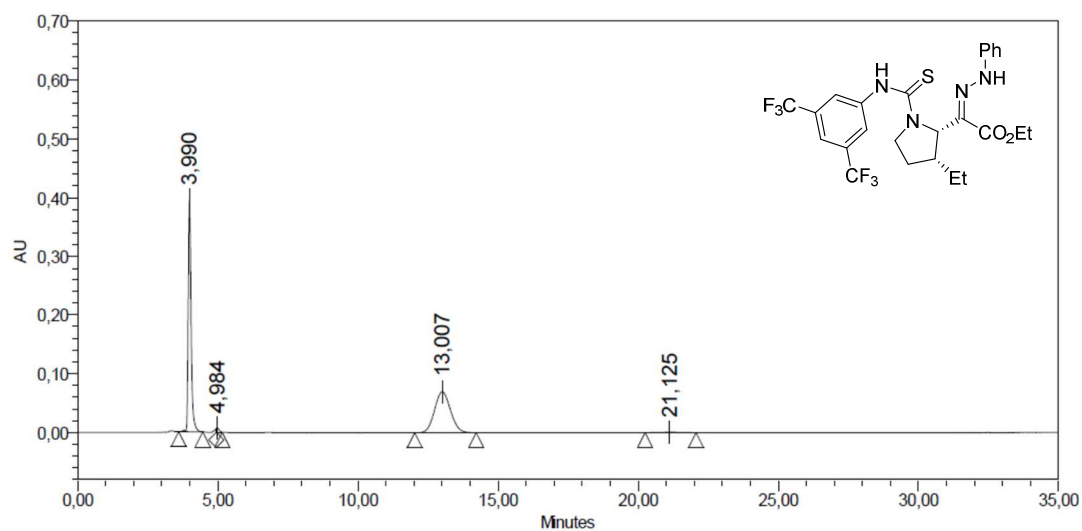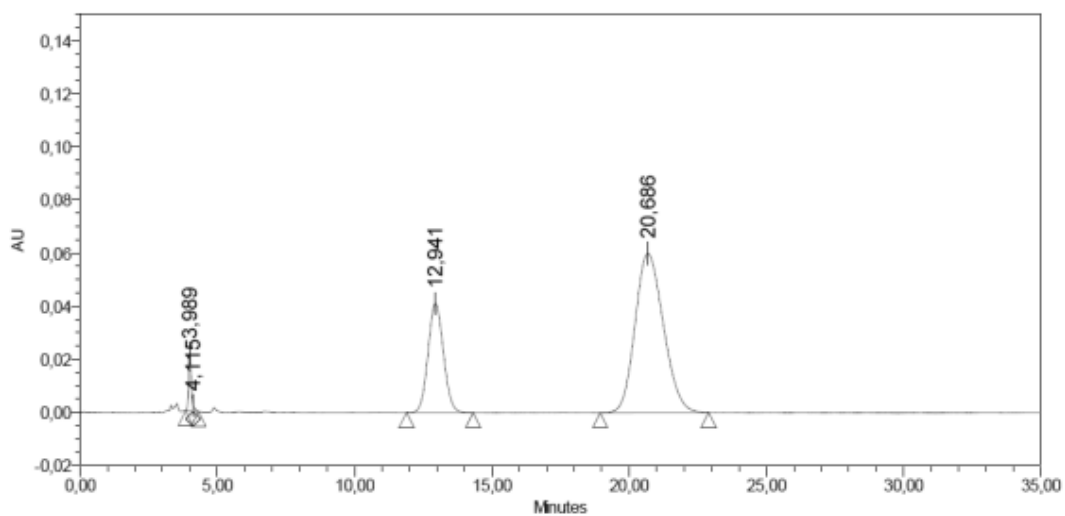

Peak Results

|   | RT     | Area    | Height | % Area |
|---|--------|---------|--------|--------|
| 1 | 3,989  | 145267  | 21810  | 2,40   |
| 2 | 4,115  | 8980    | 2160   | 0,15   |
| 3 | 12,941 | 1600727 | 41101  | 26,39  |
| 4 | 20,686 | 4310147 | 60026  | 71,06  |

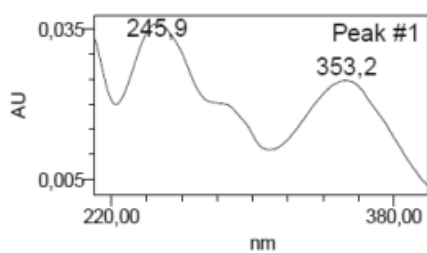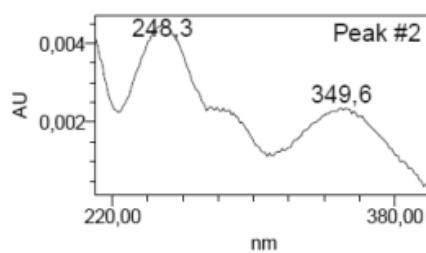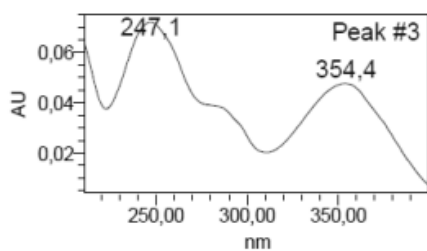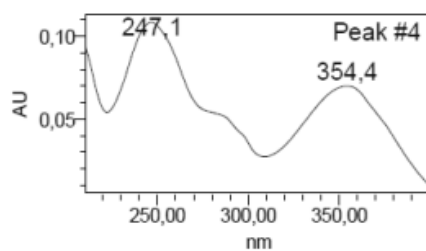

Figure SI-90. HPLC traces of compound **6b**

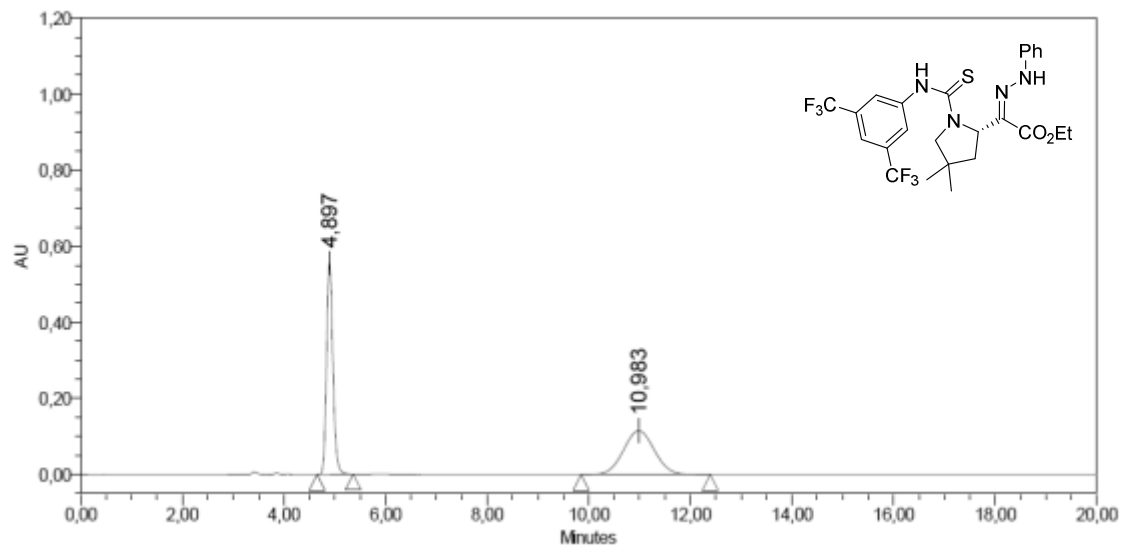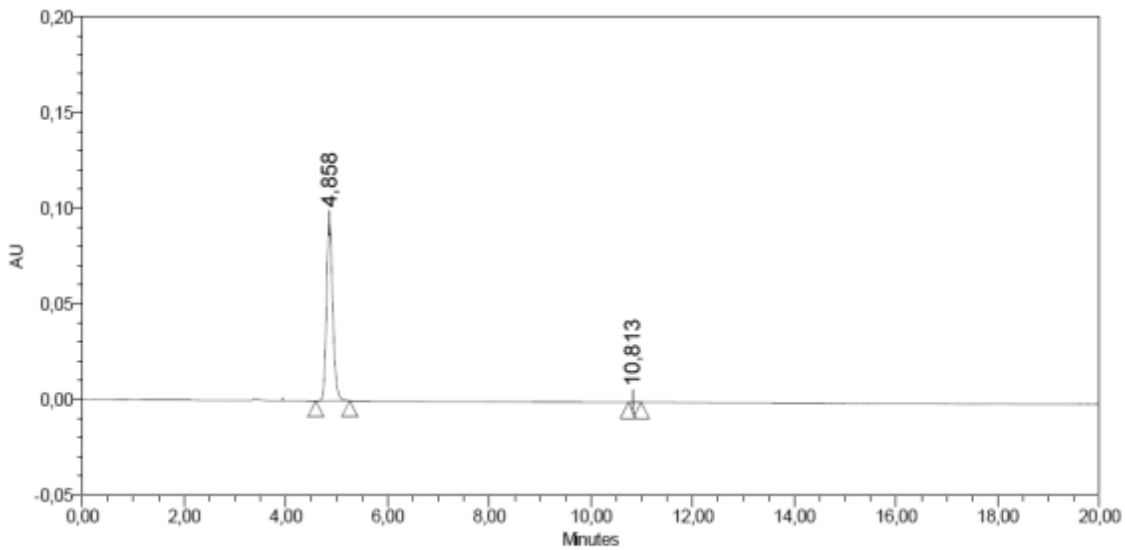

**Peak Results**

|   | RT     | Area   | Height | % Area |
|---|--------|--------|--------|--------|
| 1 | 4,858  | 803114 | 93054  | 99,94  |
| 2 | 10,813 | 510    | 83     | 0,06   |

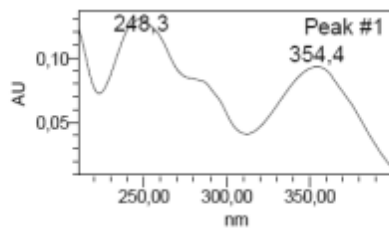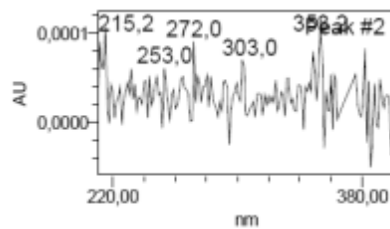

**Figure SI-91.** HPLC traces of compound **6c**



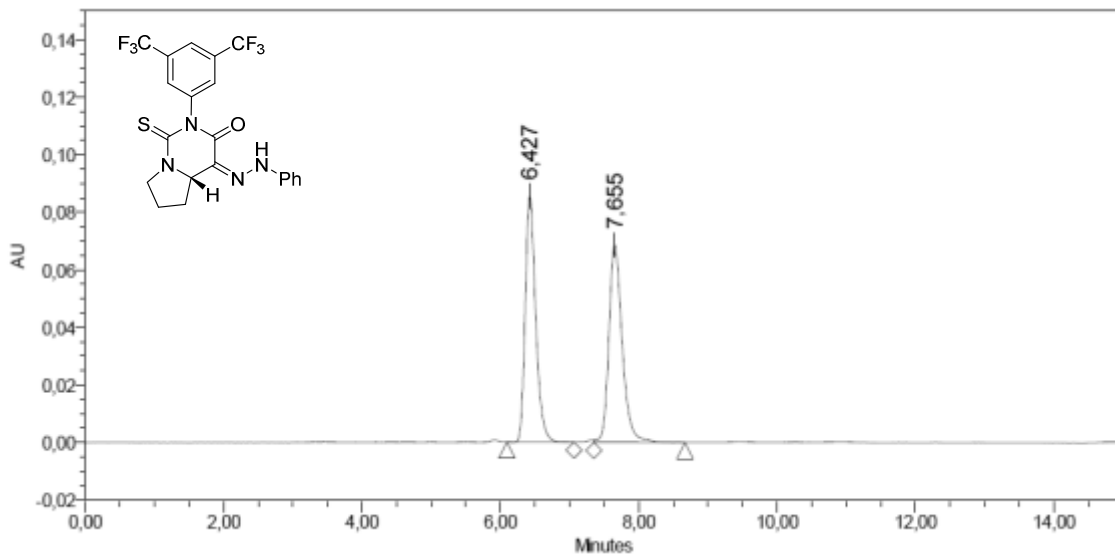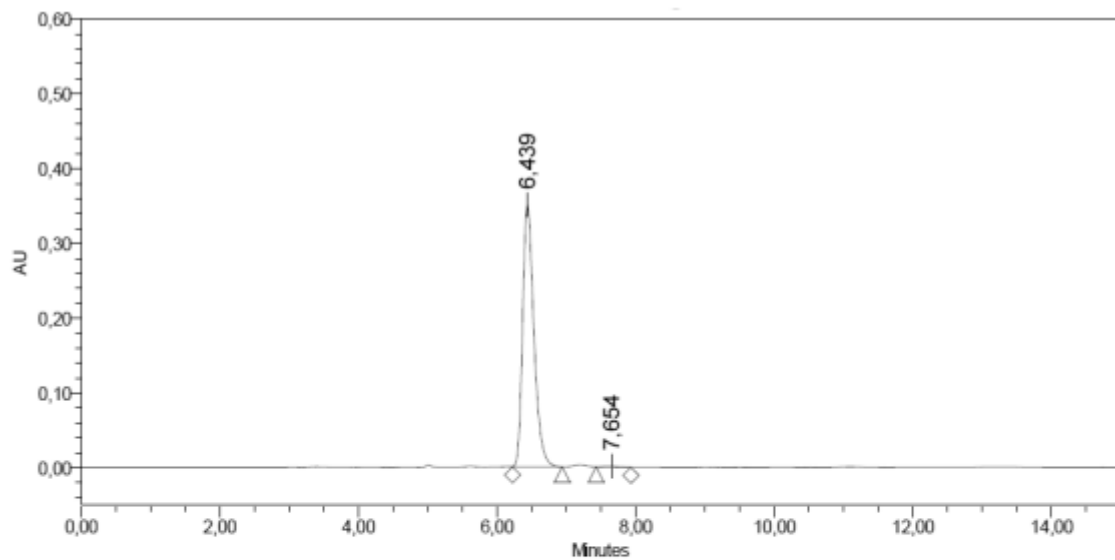

**Peak Results**

|   | RT    | Area    | Height | % Area |
|---|-------|---------|--------|--------|
| 1 | 6,439 | 3949431 | 350288 | 99,61  |
| 2 | 7,654 | 15509   | 993    | 0,39   |

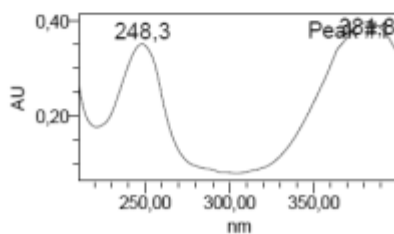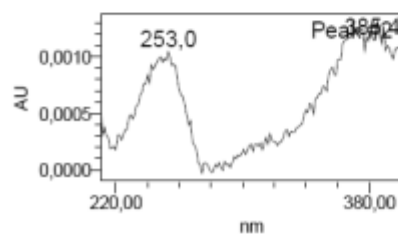

**Figure SI-92.** HPLC traces of compound 7a

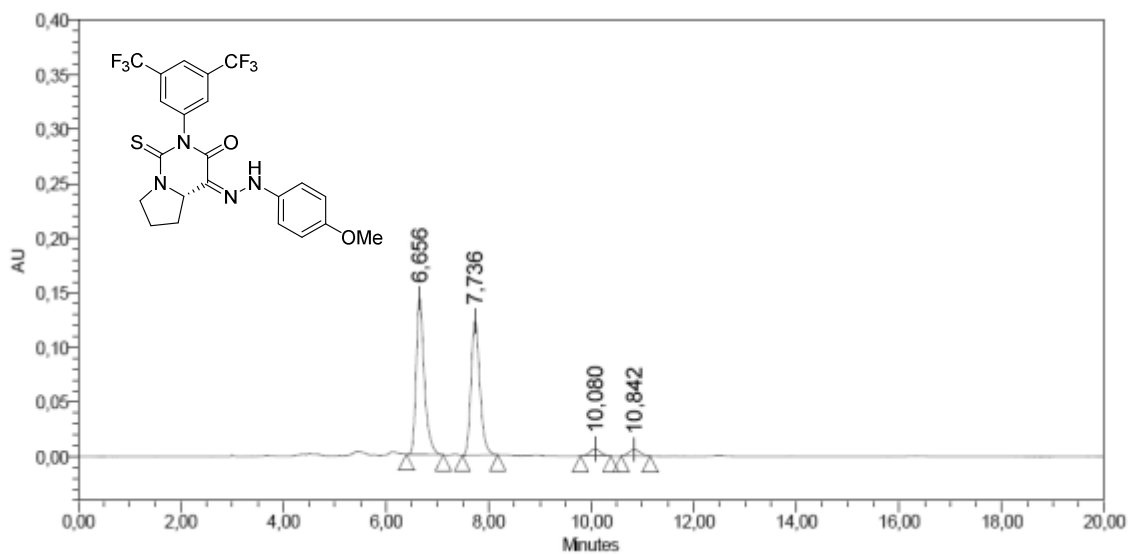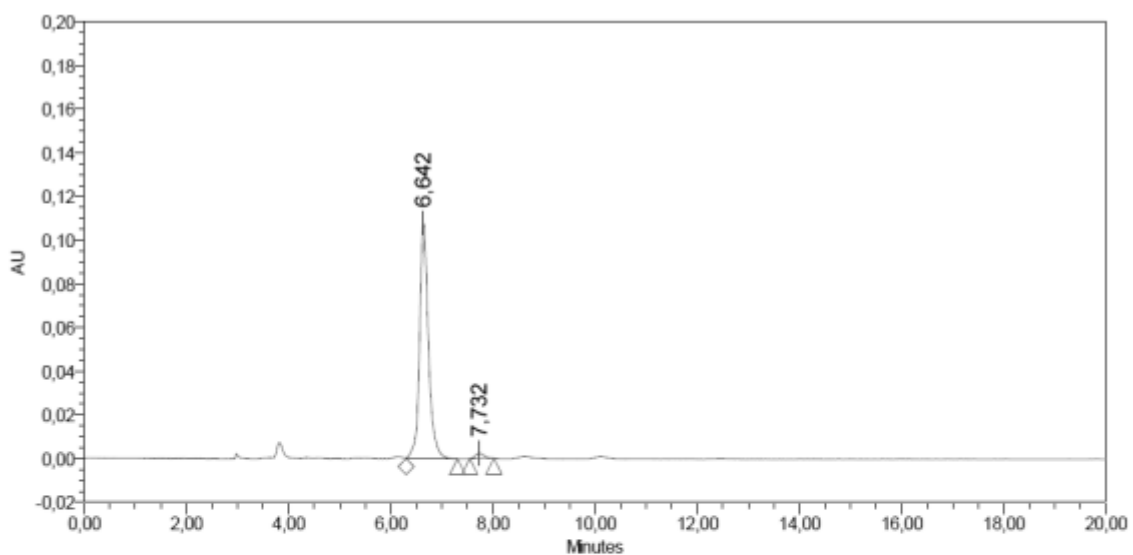

**Peak Results**

|   | RT    | Area    | Height | % Area |
|---|-------|---------|--------|--------|
| 1 | 6,642 | 1305558 | 107907 | 97,86  |
| 2 | 7,732 | 28535   | 2449   | 2,14   |

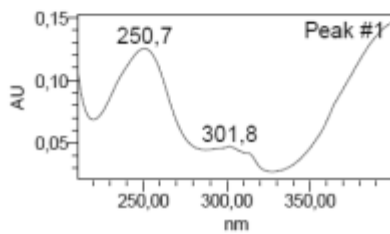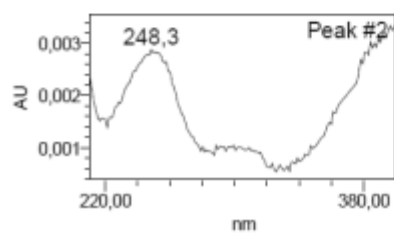

Figure SI-93. HPLC traces of compound 7b

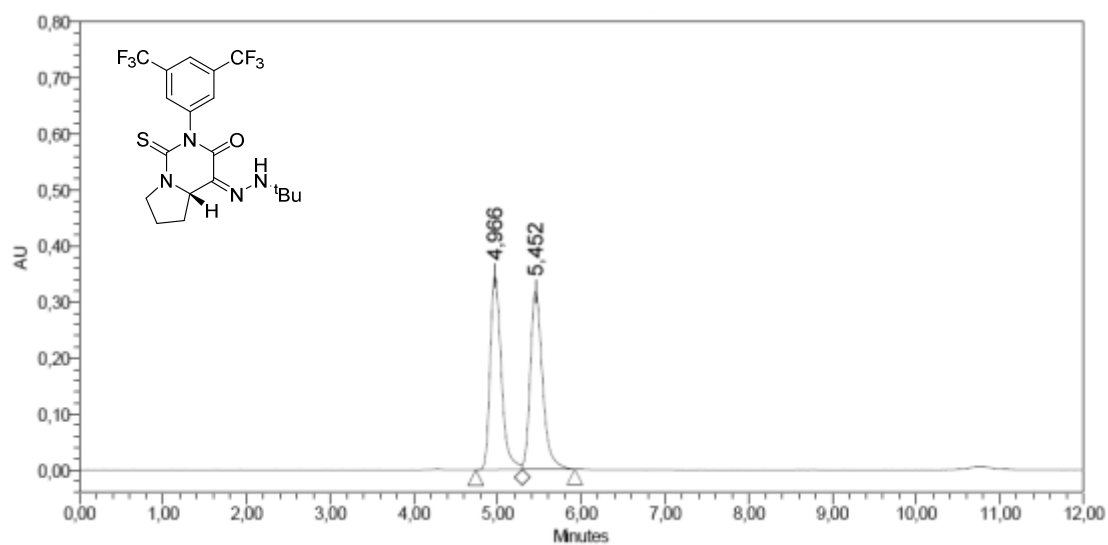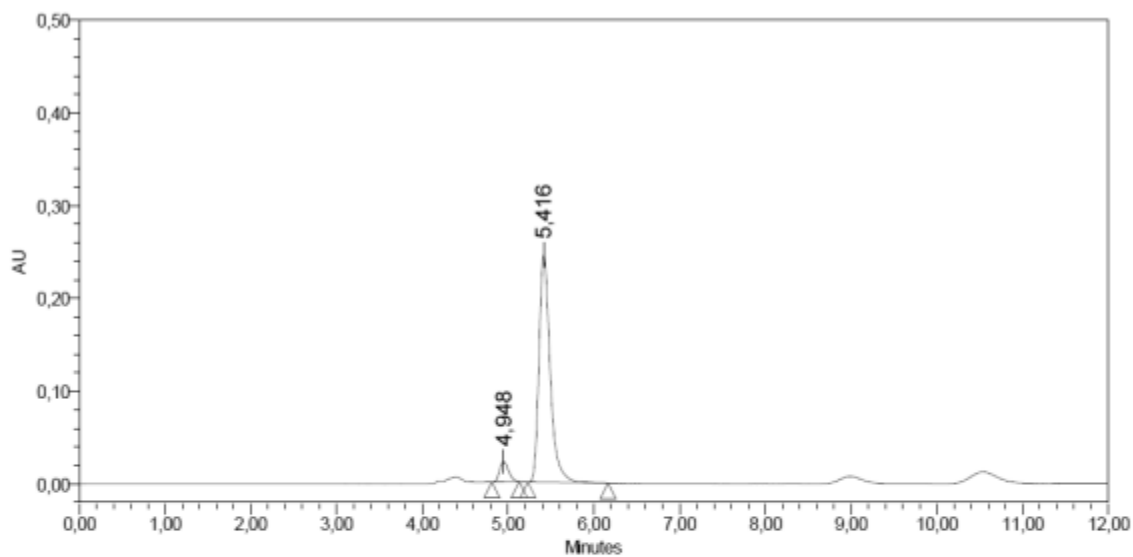

**Peak Results**

|   | RT    | Area    | Height | % Area |
|---|-------|---------|--------|--------|
| 1 | 4,948 | 159819  | 22040  | 6,71   |
| 2 | 5,416 | 2220751 | 244989 | 93,29  |

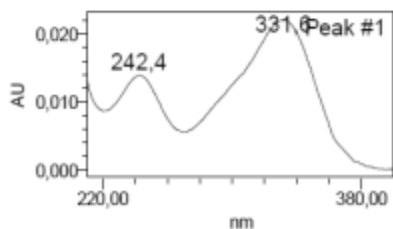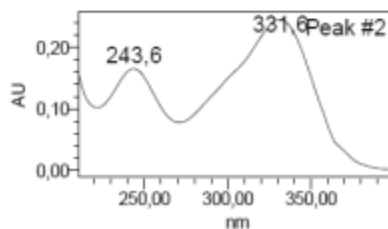

**Figure SI-94.** HPLC traces of compound 7c

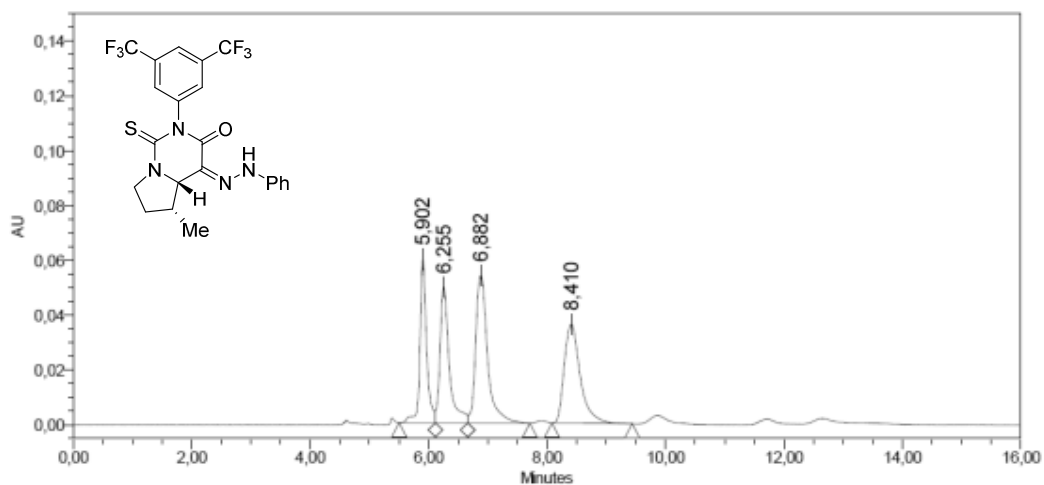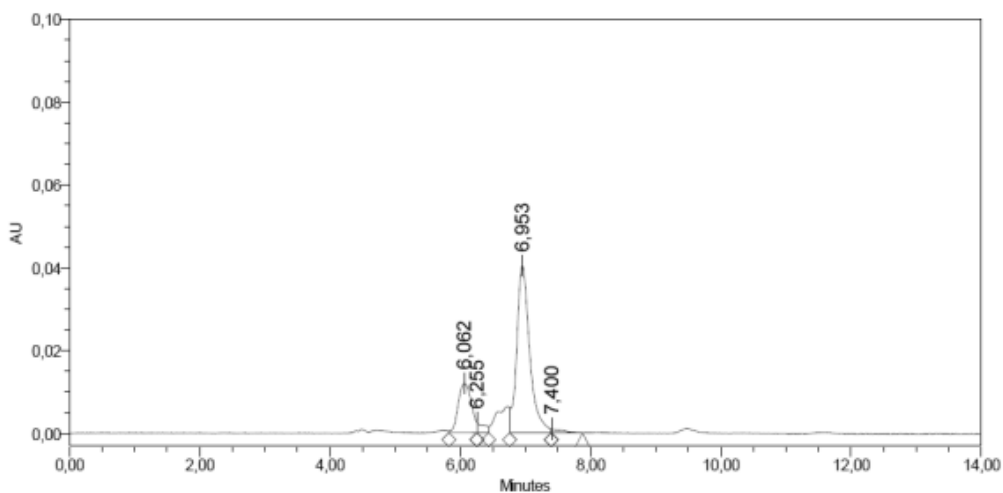

Peak Results

| RT      | Area   | Height | % Area |
|---------|--------|--------|--------|
| 1 6,062 | 165339 | 11866  | 22,00  |
| 2 6,255 | 19897  | 2501   | 2,85   |
| 3 6,953 | 555296 | 40305  | 73,90  |
| 4 7,400 | 10868  | 935    | 1,45   |

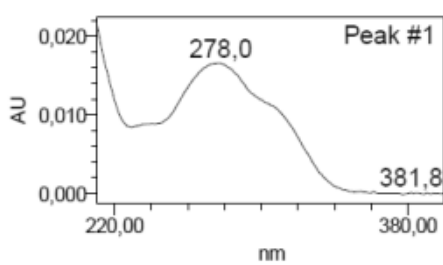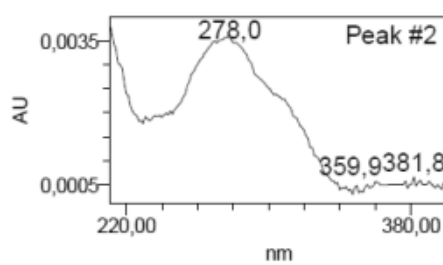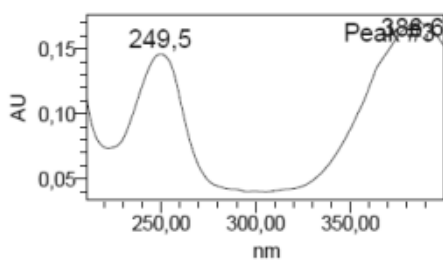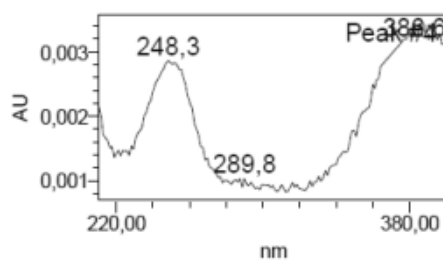

Figure SI-95. HPLC traces of compound 7d

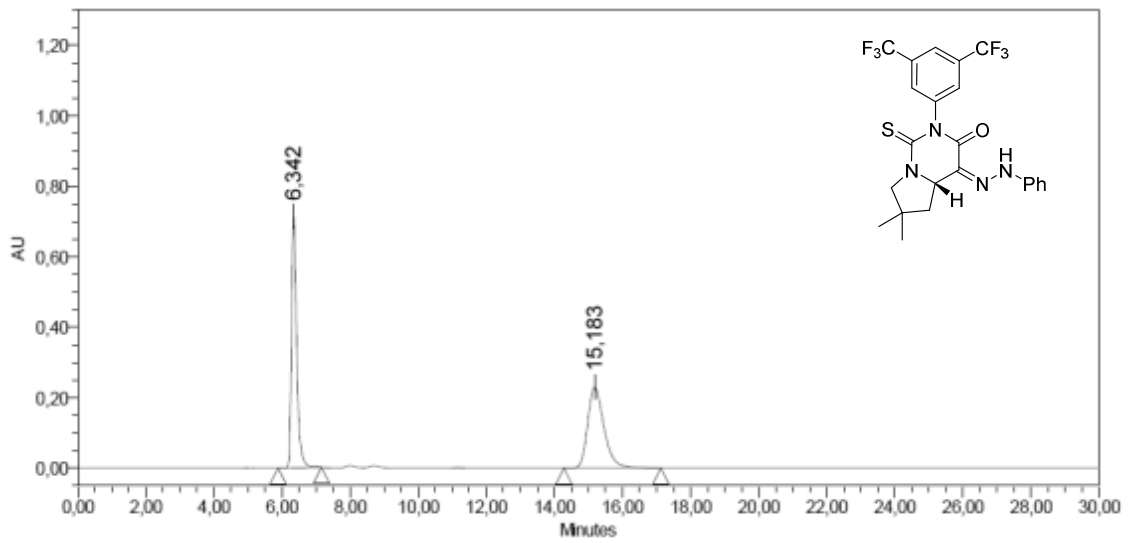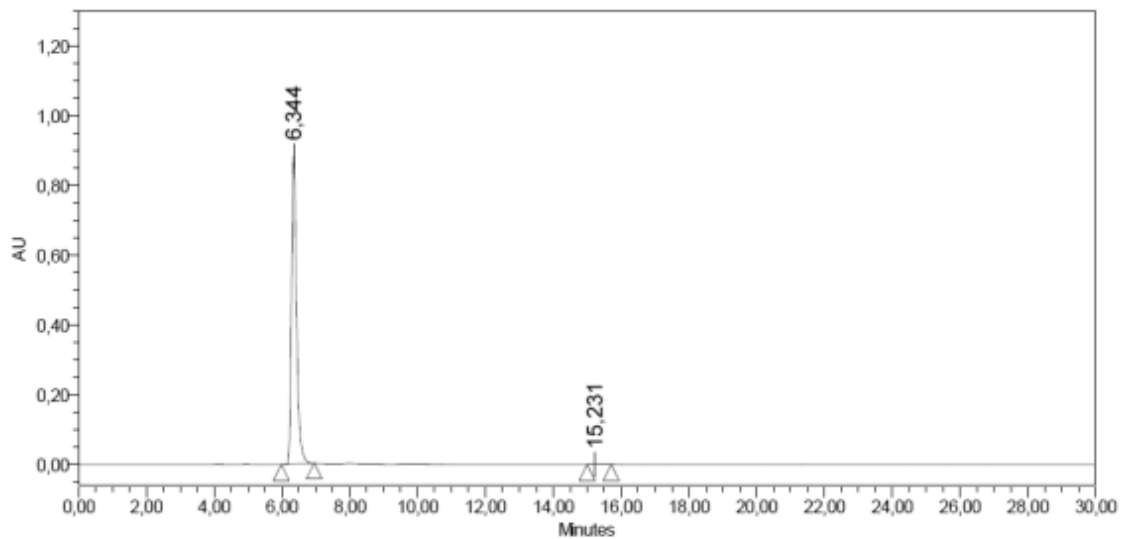

**Peak Results**

|   | RT     | Area    | Height | % Area |
|---|--------|---------|--------|--------|
| 1 | 6,344  | 9130700 | 883608 | 99,81  |
| 2 | 15,231 | 17605   | 769    | 0,19   |

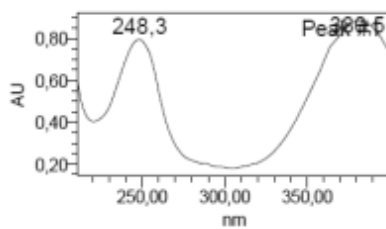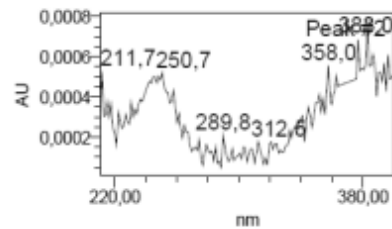

**Figure SI-96.** HPLC traces of compound **7e**

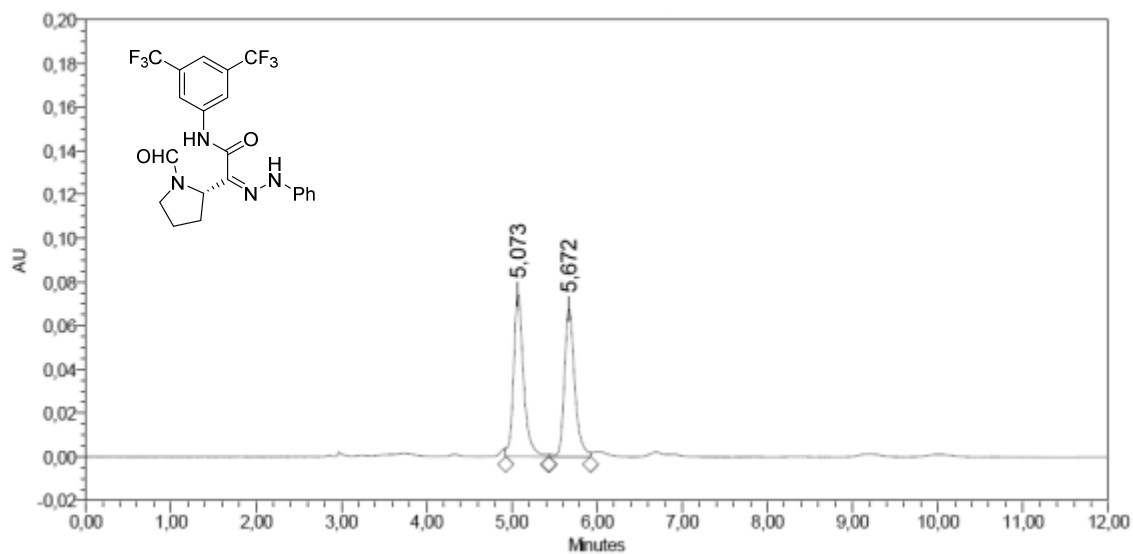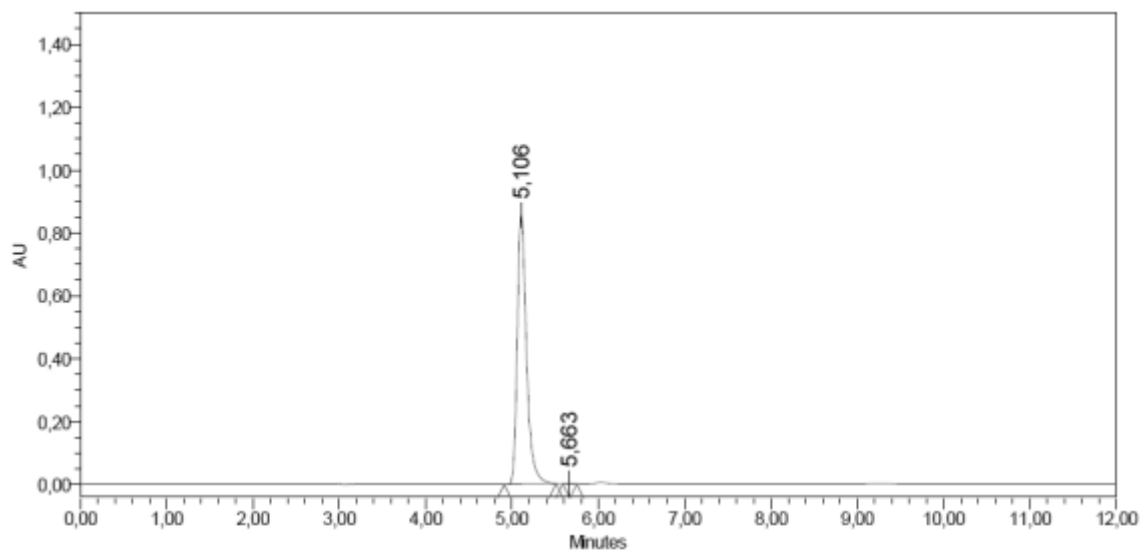

**Peak Results**

|   | RT    | Area    | Height | % Area |
|---|-------|---------|--------|--------|
| 1 | 5,106 | 6372139 | 855498 | 99,84  |
| 2 | 5,663 | 10146   | 1902   | 0,16   |

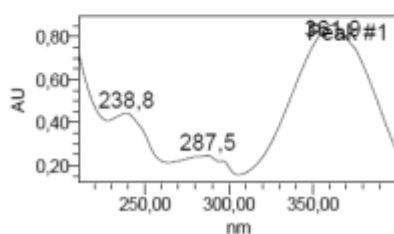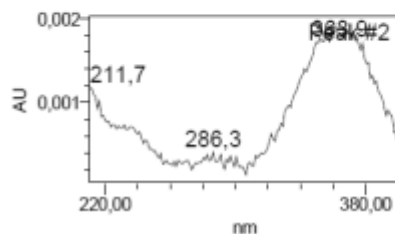

**Figure SI-97. HPLC traces of compound 7a'**

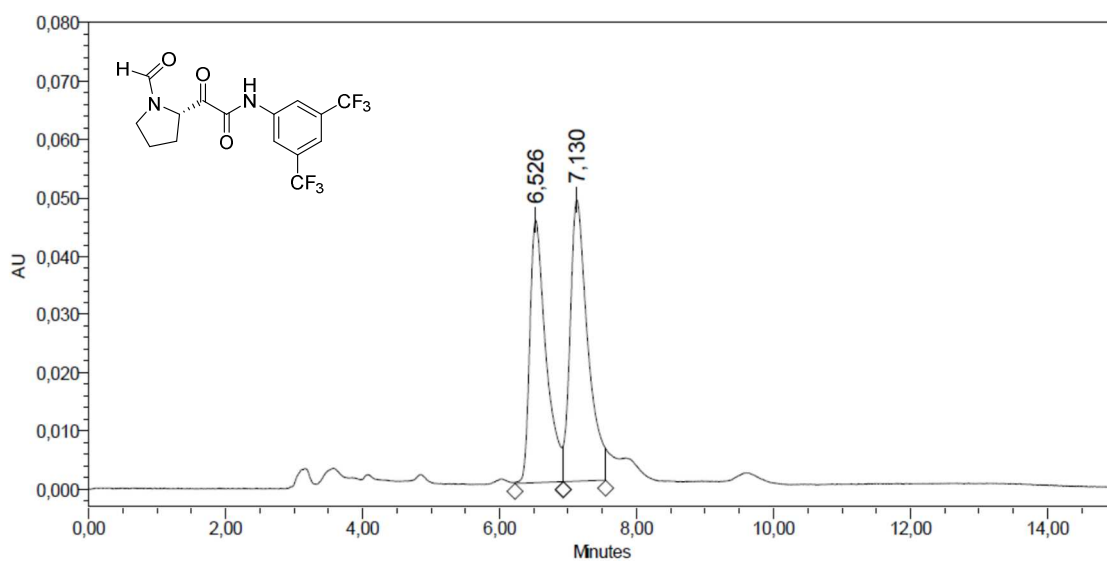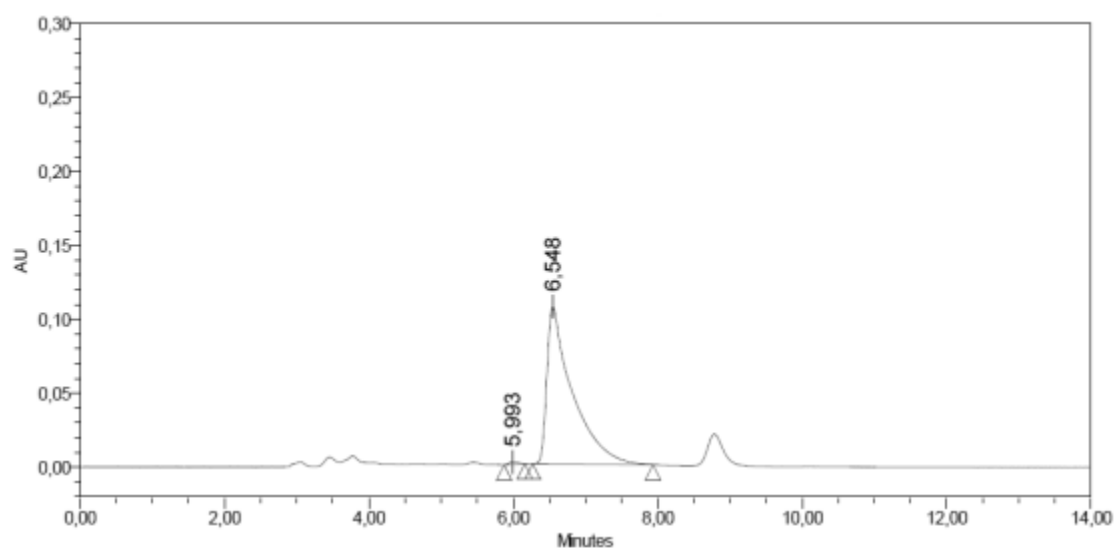

**Peak Results**

|   | RT    | Area    | Height | % Area |
|---|-------|---------|--------|--------|
| 1 | 5,993 | 14086   | 1651   | 0,54   |
| 2 | 6,548 | 2596747 | 106187 | 99,46  |

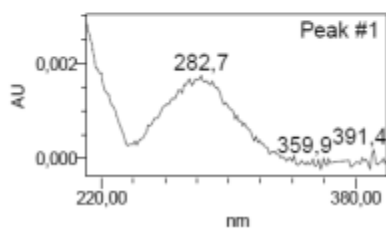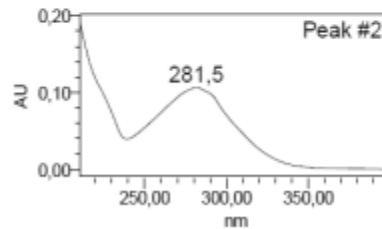

**Figure SI-98. HPLC traces of compound 8a**

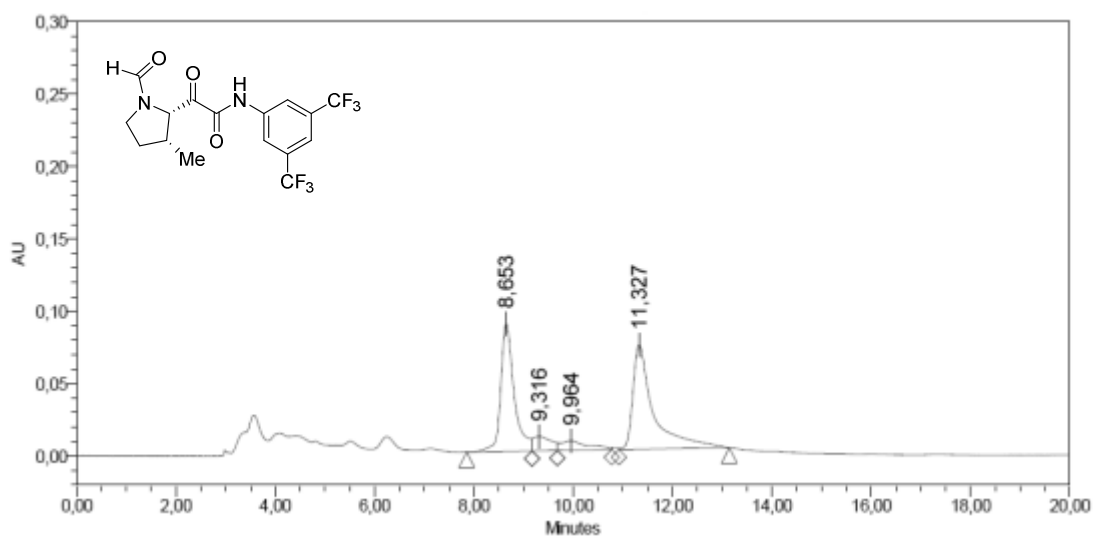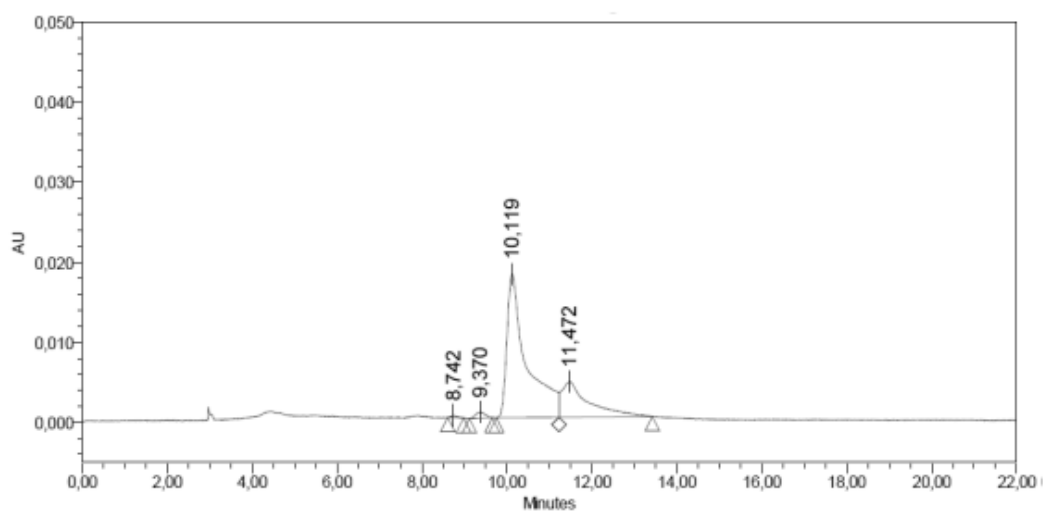

**Peak Results**

|   | RT     | Area   | Height | % Area |
|---|--------|--------|--------|--------|
| 1 | 8,742  | 2537   | 279    | 0,32   |
| 2 | 9,370  | 11476  | 773    | 1,45   |
| 3 | 10,119 | 576480 | 17941  | 73,02  |
| 4 | 11,472 | 198984 | 4451   | 25,20  |

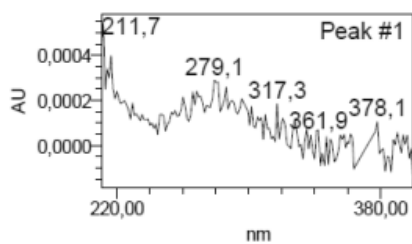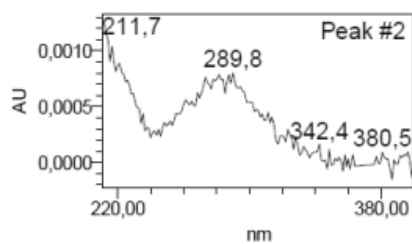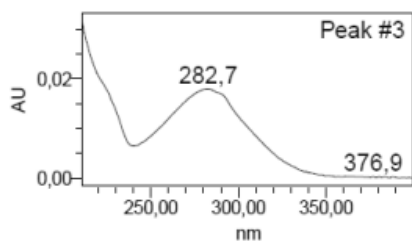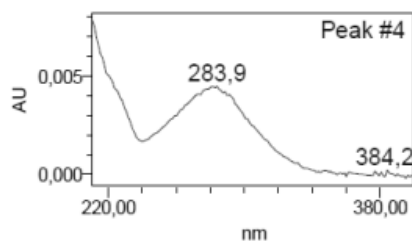

**Figure SI-99.** HPLC traces of compound **8b**



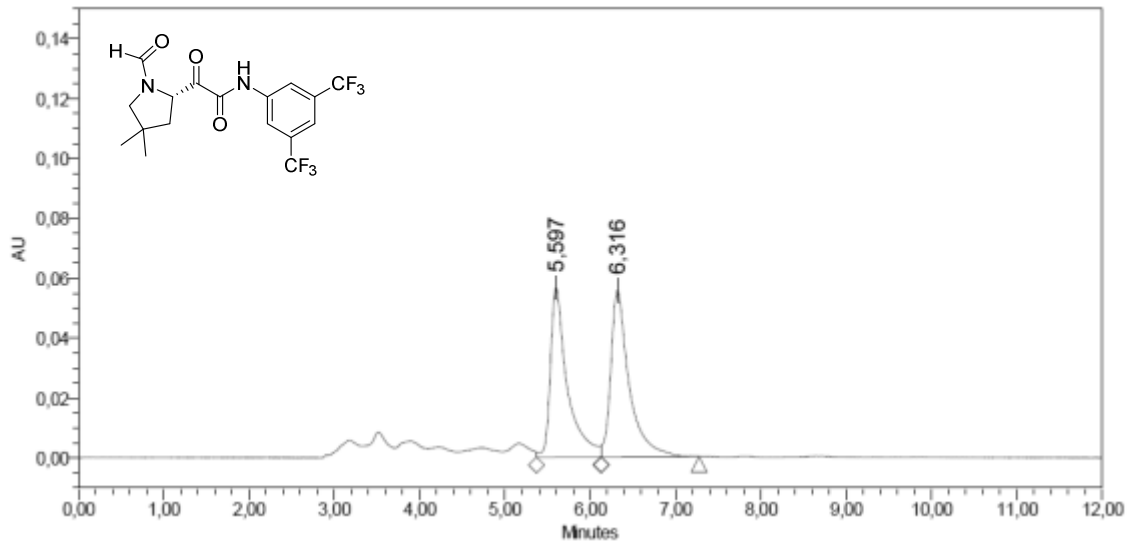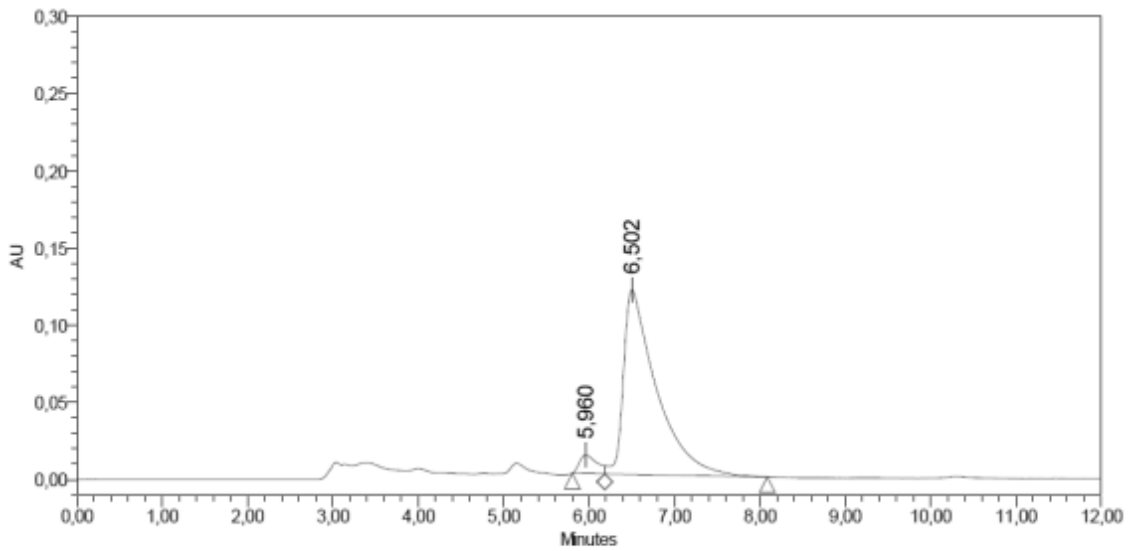

**Peak Results**

|   | RT    | Area    | Height | % Area |
|---|-------|---------|--------|--------|
| 1 | 5,960 | 169687  | 11977  | 5,03   |
| 2 | 6,502 | 3201397 | 119566 | 94,97  |

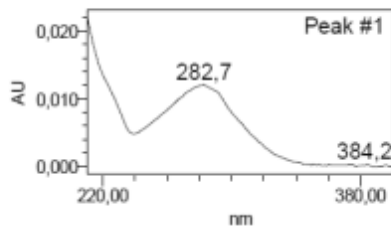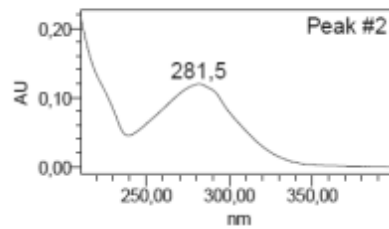

**Figure SI-100. HPLC traces of compound 8c**

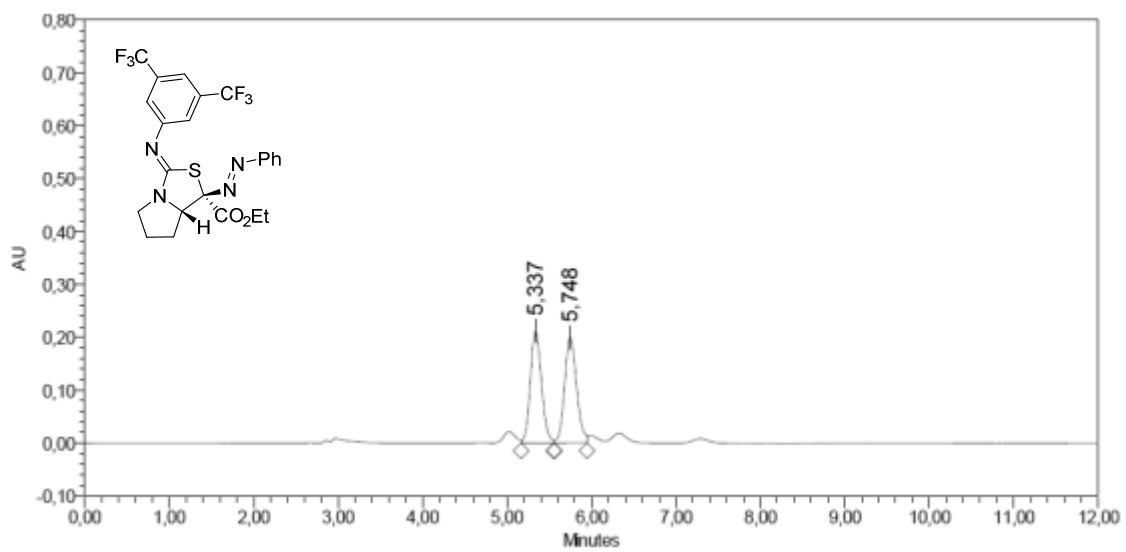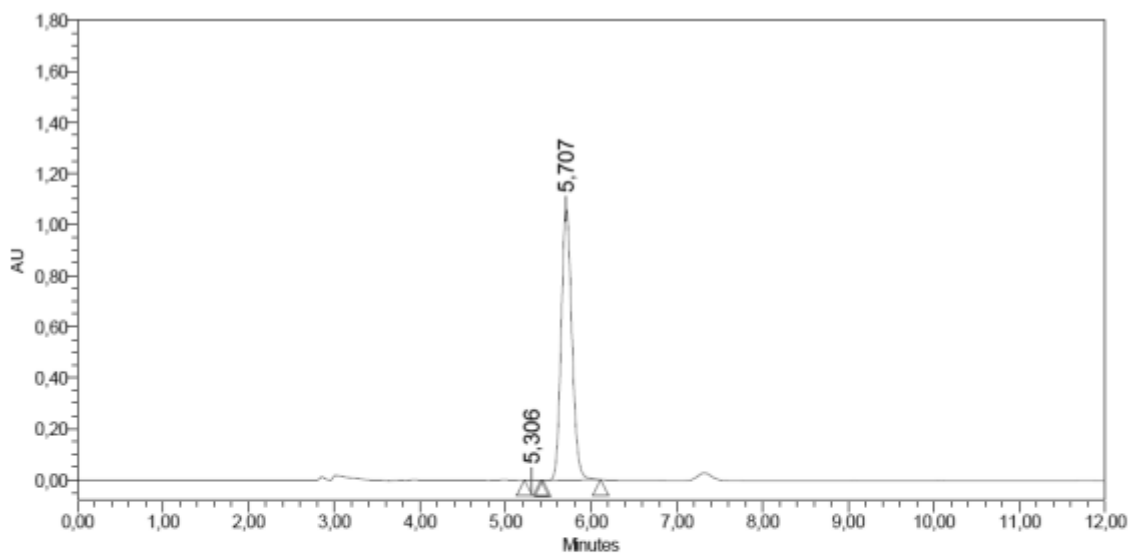

**Peak Results**

|   | RT    | Area    | Height  | % Area |
|---|-------|---------|---------|--------|
| 1 | 5,306 | 5131    | 842     | 0,06   |
| 2 | 5,707 | 9242299 | 1061838 | 99,94  |

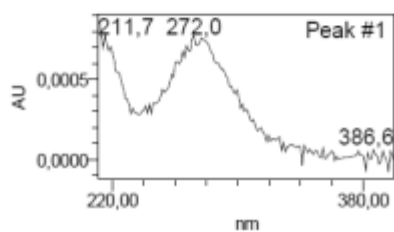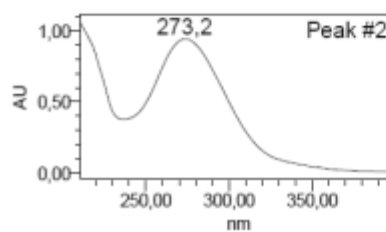

**Figure SI-101. HPLC traces of compound 9a**

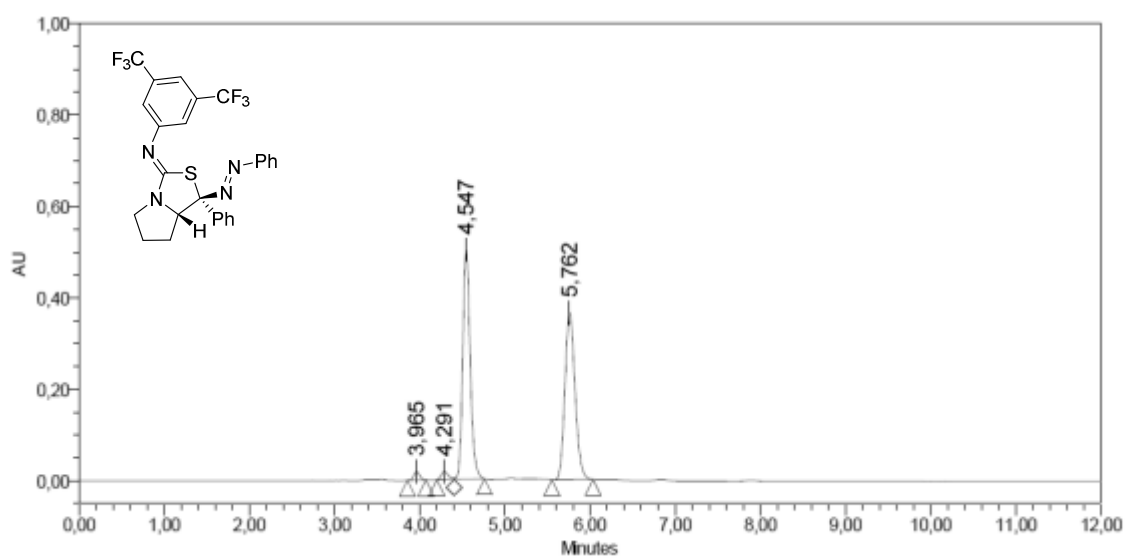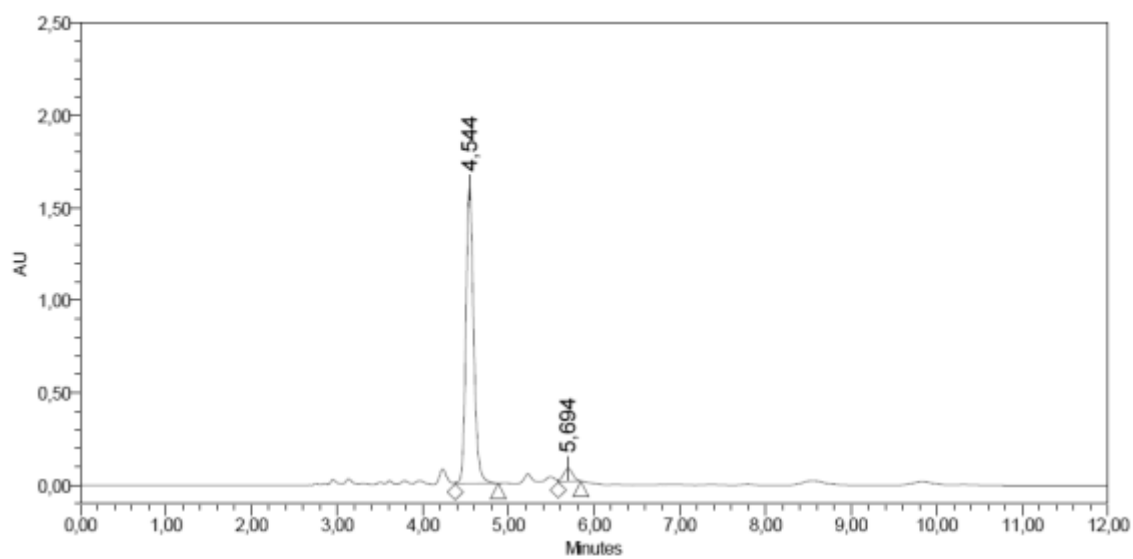

**Peak Results**

|   | RT    | Area     | Height  | % Area |
|---|-------|----------|---------|--------|
| 1 | 4,544 | 10123017 | 1605123 | 94,93  |
| 2 | 5,694 | 540985   | 71689   | 5,07   |

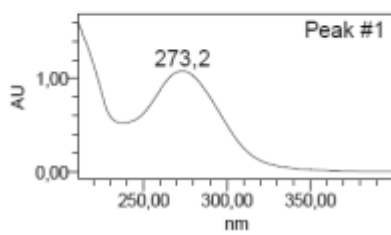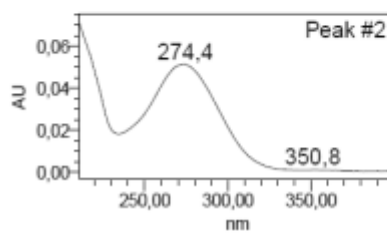

**Figure SI-102. HPLC traces of compound **9b****

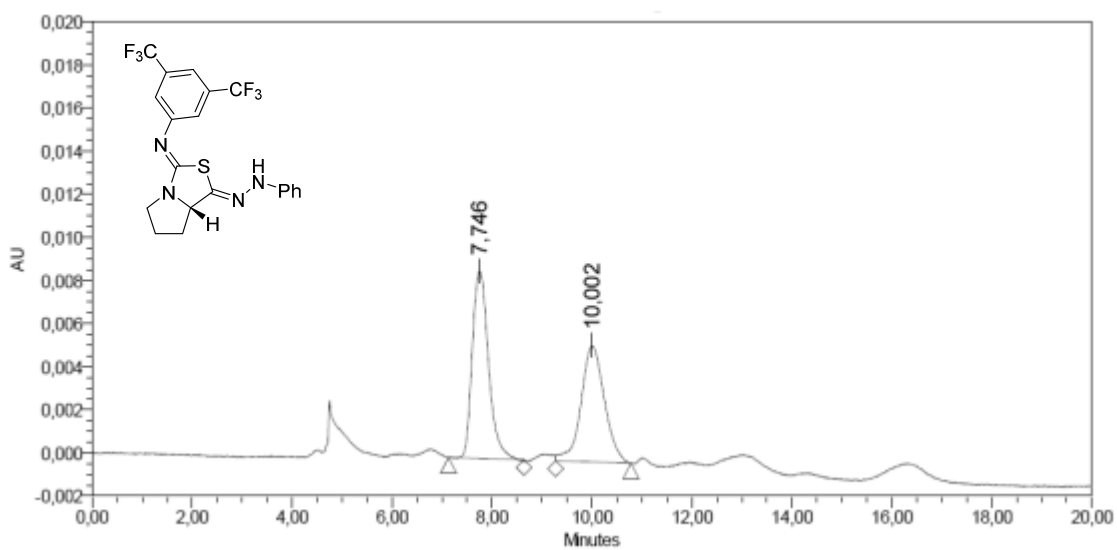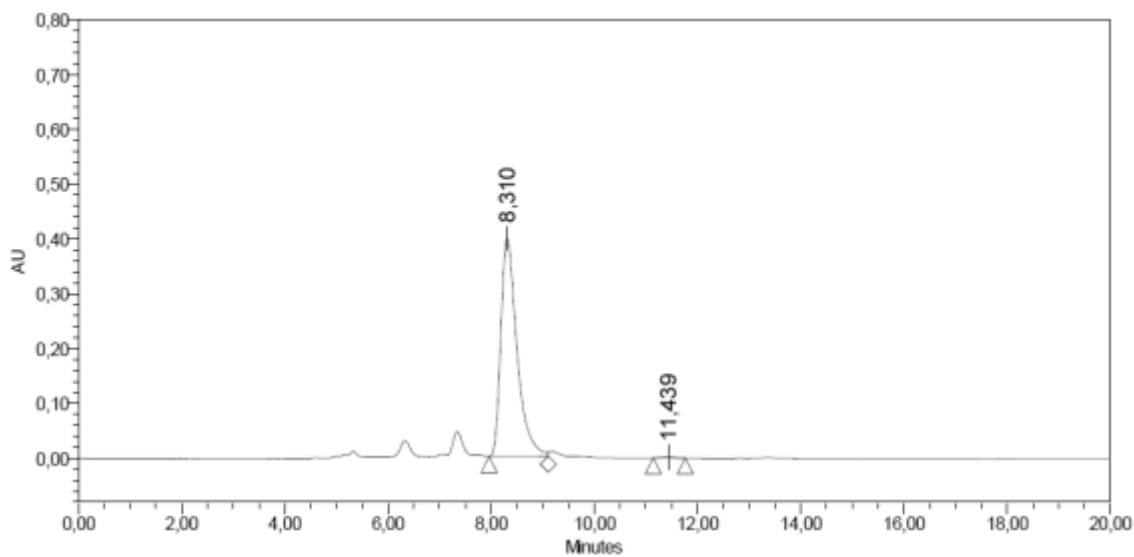

**Peak Results**

|   | RT     | Area    | Height | % Area |
|---|--------|---------|--------|--------|
| 1 | 8,310  | 8650302 | 398324 | 99,73  |
| 2 | 11,439 | 23074   | 1116   | 0,27   |

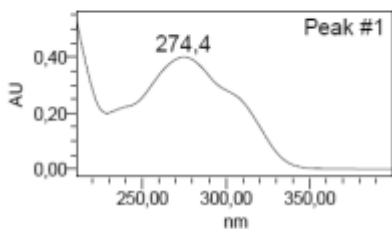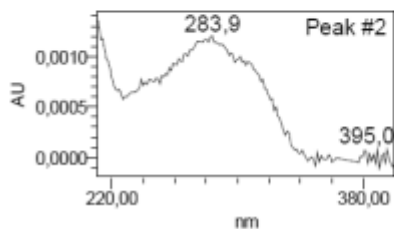

**Figure SI-103. HPLC traces of compound 10**

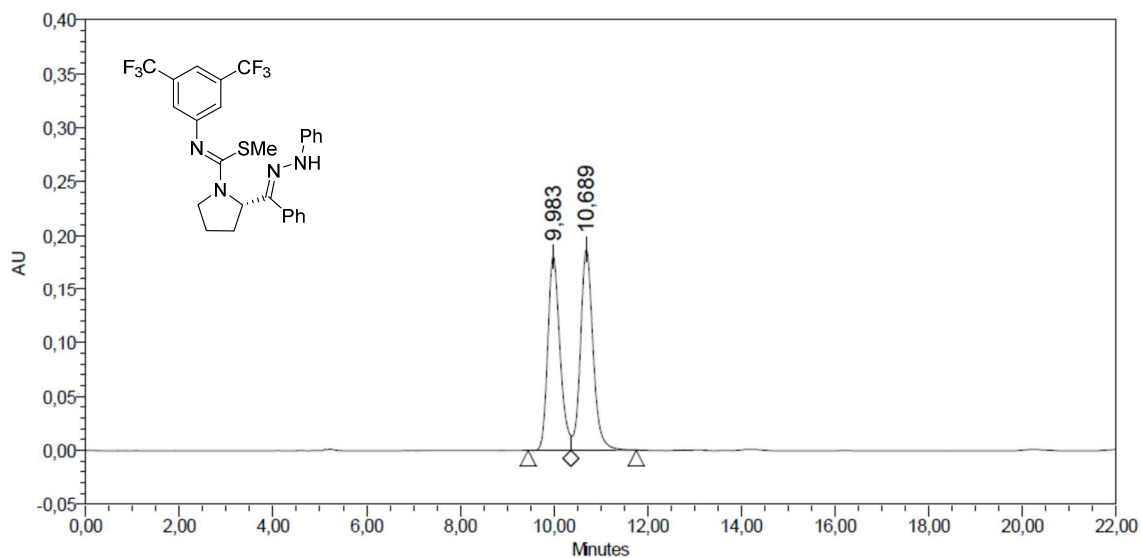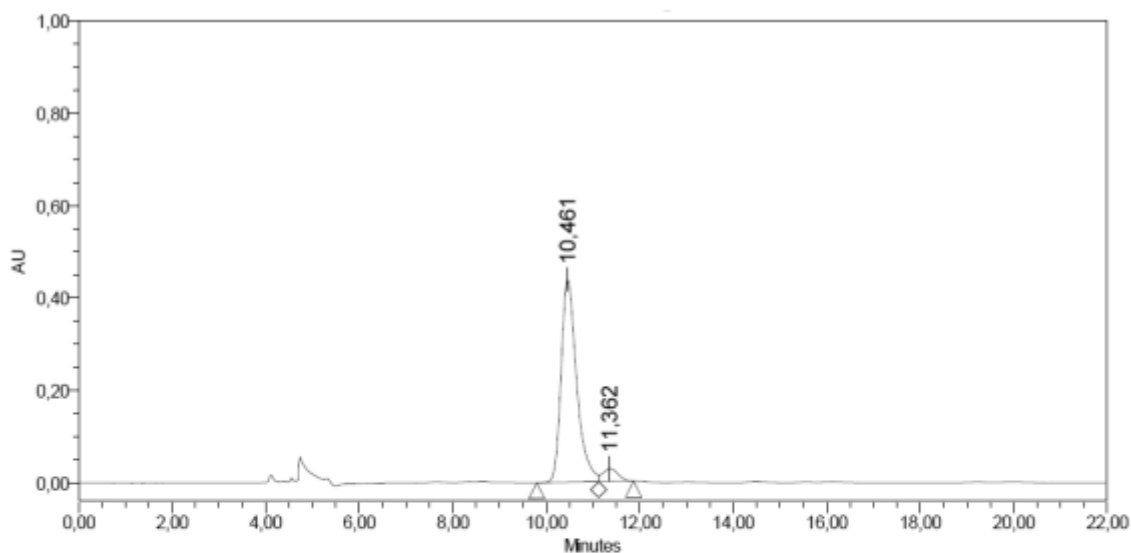

**Peak Results**

|   | RT     | Area     | Height | % Area |
|---|--------|----------|--------|--------|
| 1 | 10,461 | 10105834 | 438968 | 93,99  |
| 2 | 11,362 | 646645   | 28138  | 6,01   |

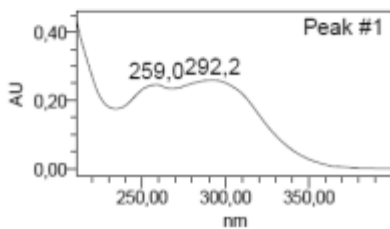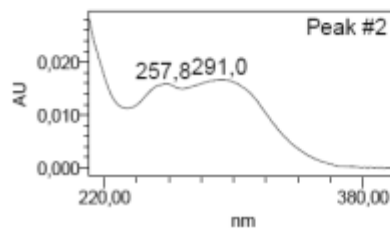

**Figure SI-104. HPLC traces of compound 11**

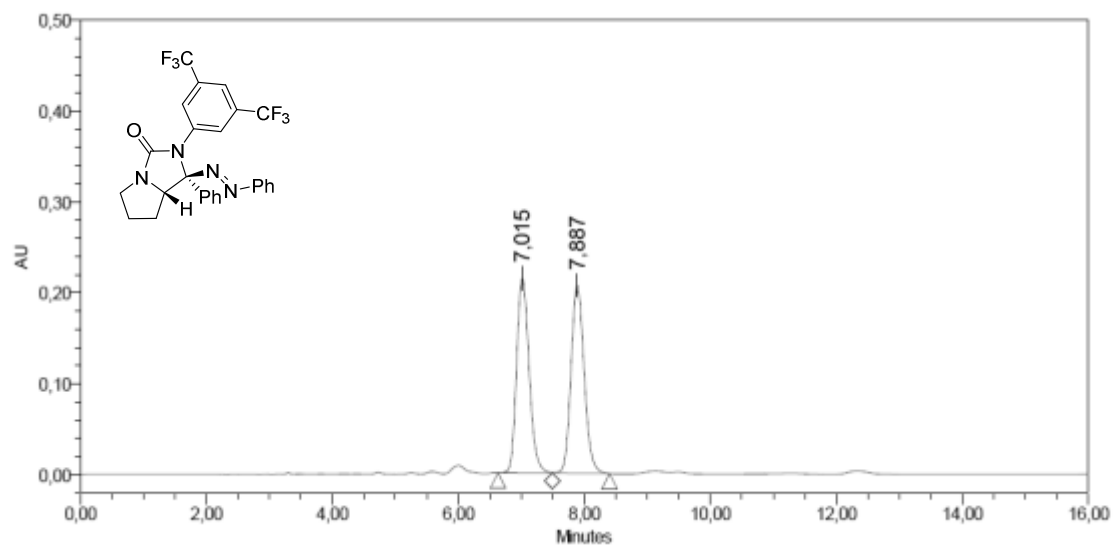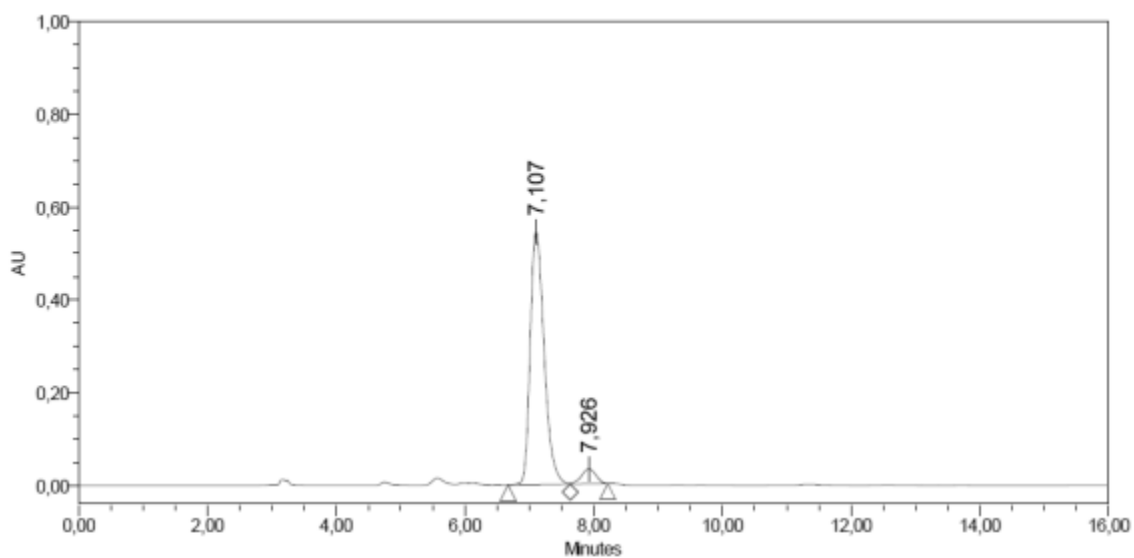

**Peak Results**

|   | RT    | Area    | Height | % Area |
|---|-------|---------|--------|--------|
| 1 | 7,107 | 8192095 | 545097 | 94,22  |
| 2 | 7,926 | 502868  | 32115  | 5,78   |

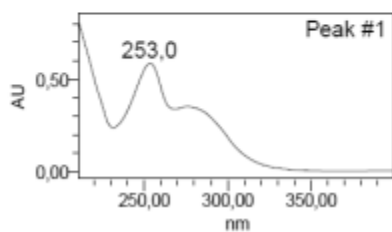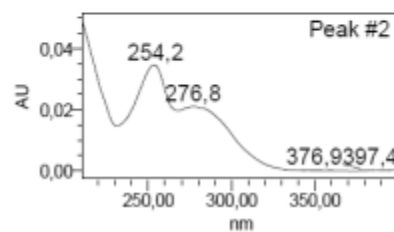

**Figure SI-105. HPLC traces of compound 12**
